# Supplementary material for: Development and validation of a novel risk score to predict 5-year mortality in patients with acute myocardial infarction in China: a retrospective study
Source: PeerJ. 2022 Jan 4;10:e12652. doi: 10.7717/peerj.12652 (PMC8740514; doi:10.7717/peerj.12652)
Supplement: Supplemental Information 4 — Notes: Items relevant only to the development of a prediction model are denoted by D, items relating solely to a validation of a prediction model are denoted by V, and items relating to both are denoted D; V. We recommend using the TRIPOD Checklist in conjunction with the TRIPOD Explanation and Elaboration document. [file peerj-10-12652-s004.doc]

**Table S1 TRIPOD Checklist: Prediction Model Development and Validation.**

| **Section/Topic** | **Item** |  | **Checklist Item** | **Page** |
| --- | --- | --- | --- | --- |
| **Title and abstract** | | | | |
| Title | 1 | D; V | Identify the study as developing and/or validating a multivariable prediction model, the target population, and the outcome to be predicted. | 1 |
| Abstract | 2 | D; V | Provide a summary of objectives, study design, setting, participants, sample size, predictors, outcome, statistical analysis, results, and conclusions. | 2-3 |
| **Introduction** | | | | |
| Background and objectives | 3a | D; V | Explain the medical context (including whether diagnostic or prognostic) and rationale for developing or validating the multivariable prediction model, including references to existing models. | 4-5 |
| 3b | D; V | Specify the objectives, including whether the study describes the development or validation of the model or both. | 5 |
| **Methods** | | | | |
| Source of data | 4a | D; V | Describe the study design or source of data (e.g., randomized trial, cohort, or registry data), separately for the development and validation data sets, if applicable. | 5-7 |
|  | 4b | D; V | Specify the key study dates, including start of accrual; end of accrual; and, if applicable, end of follow-up. | 5-7 |
| Participants | 5a | D; V | Specify key elements of the study setting (e.g., primary care, secondary care, general population) including number and location of centres. | 5-7 |
| 5b | D; V | Describe eligibility criteria for participants | 5-7 |
| 5c | D; V | Give details of treatment received, if relevant. | NA |
| Outcome | 6a | D; V | Clearly define the outcome that is predicted by the prediction model, including how and when assessed. | 5-7 |
| 6b | D; V | Report any actions to blind assessment of the outcome to be predicted. | NA |
| Predictors | 7a | D; V | Clearly define all predictors used in developing or validating the multivariable prediction model, including how and when they were measured. | 7-11 |
| 7b | D; V | Report any actions to blind assessment of predictors for the outcome and other predictors. | NA |
| Sample size | 8 | D; V | Explain how the study size was arrived at | 5-12 |

**Table S1 *(Continued).***

| **Section/Topic** | **Item** |  | **Checklist Item** | **Page** |
| --- | --- | --- | --- | --- |
| **Methods** | | | | |
| Missing data | 9 | D; V | Describe how missing data were handled (e.g., complete-case analysis, single imputation, multiple imputation) with details of any imputation method. | 11-12 |
| Statistical analysis methods | 10a | D | Describe how predictors were handled in the analyses. | 5-13 |
| 10b | D | Specify type of model, all model-building procedures (including any predictor selection), and method for internal validation. | 7-13 |
| 10c | V | For validation, describe how the predictors were calculated | 7-13 |
| 10d | D; V | Specify all measures used to assess model performance and, if relevant, to compare multiple models. | 7-13 |
| 10e | V | Describe any model updating (e.g., recalibration) arising from the validation, if done. | 7-13 |
| Risk groups | 11 | D; V | Provide details on how risk groups were created, if done. | 9-10 |
| Development  vs. validation | 12 | V | For validation, identify any differences from the development data in setting, eligibility criteria, outcome, and predictors. | 5-13 |
| **Results** | | | | |
| Participants | 13a | D; V | Describe the flow of participants through the study, including the number of participants with and without the outcome and, if applicable, a summary of the follow-up time. A diagram may be helpful. | 13-19 |
| 13b | D; V | Describe the characteristics of the participants (basic demographics, clinical features, available predictors), including the number of participants with missing data for predictors and outcome. | 13-19 |
| 13c | V | For validation, show a comparison with the development data of the distribution of important variables (demographics, predictors and outcome). | 13-19 |
| Model development | 14a | D | Specify the number of participants and outcome events in each analysis. | 14-19 |
| 14b | D | If done, report the unadjusted association between each candidate predictor and outcome. | NA |
| Model specification | 15a | D | Present the full prediction model to allow predictions for individuals (i.e., all regression coefficients, and model intercept or baseline survival at a given time point). | 14-20 |
| 15b | D | Explain how to the use the prediction model. | 15-20 |

**Table S1 *(Continued).***

| **Section/Topic** | **Item** |  | **Checklist Item** | **Page** |
| --- | --- | --- | --- | --- |
| **Results** | | | | |
| Model performance | 16 | D; V | Report performance measures (with CIs) for the prediction model. | 14-19 |
| Model-updating | 17 | V | If done, report the results from any model updating (i.e., model specification, model performance). | 14-20 |
| **Discussion** | | | | |
| Limitations | 18 | D; V | Discuss any limitations of the study (such as nonrepresentative sample, few events per predictors, missing data) | 25-26 |
| Interpretation | 19a | V | For validation, discuss the results with reference to performance in the development data, and any other validation data. | 20-26 |
| 19b | D; V | Give an overall interpretation of the results, considering objectives, limitations, results from similar studies, and other relevant evidence. | 20-26 |
| Implications | 20 | D; V | Discuss the potential clinical use of the model and implications for future research. | 20-26 |
| **Other information** | | | | |
| Supplementary information | 21 | D; V | Provide information about the availability of supplementary resources, such as study protocol, Web calculator, and data sets. | 28, S |
| Funding | 22 | D; V | Give the source of funding and the role of the funders for the present study. | 26-27 |

**Notes:** Items relevant only to the development of a prediction model are denoted by D, items relating solely to a validation of a prediction model are denoted by V, and items relating to both are denoted D; V. We recommend using the TRIPOD Checklist in conjunction with the TRIPOD Explanation and Elaboration document.
