# Supplementary material for: Development and validation of a novel risk score to predict 5-year mortality in patients with acute myocardial infarction in China: a retrospective study
Source: PeerJ. 2022 Jan 4;10:e12652. doi: 10.7717/peerj.12652 (PMC8740514; doi:10.7717/peerj.12652)
Supplement: Supplemental Information 16 — Abbreviations: AMI, acute myocardial infarction; IQR, interquartile range; BMI, body mass index; STEMI, ST segment elevation myocardial infarction; Door-to-Balloon time, Time from hospital arrival to first balloon inflation; HR, heart rate; WBC, white blood cell; Hb, hemoglobin; PLT, platelet; ALT, alanine transaminase; Cr, creatinine; FBG, fast blood glucose; LDL-C, low-density lipoprotein cholesterol; NT-proBNP, N-terminal pro-brain natriuretic peptide; cTnI, cardiac Troponin I; MI, myocardial infarction; PCI, percutaneous transluminal coronary intervention; AF, atrial fibrillation; LVEF, left ventricular ejection fraction; LA, left atrial; LVDd, left ventricular end-diastolic diameter; RA, right atrial; RV, right ventricular; LV, left ventricular; Antiplatelets, aspirin, clopidogrel, ticagrelor; Antihypertensives, angiotensin-converting enzyme inhibitor, angiotensin receptor blocker, calcium-channel blocker, β-receptor blocker; CABG, coronary artery bypass grafting. [file peerj-10-12652-s016.xlsx]

## Sheet: Data of Development Cohort
ST segment depression	Prior PCI	Prior MI	STEMI	Acute Anterior MI	Door-to-door time<4h	gender	Age	BMI	Smoke	Hb	antihypertensiondrugs	Left main coronary lesion	Atrial Fibrillation	Heart Rate	Admission Systolic Blood Pressure	Admission Diastolic Blood Pressure	WBC	PLT	cTnI	NT-proBNP	FBG	ALT	LDL-C	Cr	PCI	Statins	Antiplateletdrugs	Killip	Diabetes	Hypertension	Stroke	Cardiac Arrest	Mitral Regurgitation	Aortic Regurgitation	Tricuspid Regurgitation	Pulmonic Regurgitation	Left Ventricular Compliance Decreased	LVEF	LA	RA	LVDd	RV	CABG	Coronary multivessel lesion	Survival Time	Death
0	0	0	1	1	1	M	39	28.34	1	162	5	0	0	107	145	84	17.67	255	8.922	888.94	4.65	73	3.19	30	1	1	5	1	0	1	0	0	0	0	1	0	0	42	33	35	55	31	0	0	65	0
0	0	1	1	0	0	M	41	25.69	1	152	5	0	0	74	114	66	11.54	177	16	712.67	7.73	73	2.27	32	1	1	4	1	1	0	0	0	1	0	1	0	1	58	37	33	58	35	0	0	88	0
0	0	0	1	1	0	F	55	21.88	0	139	5	0	0	79	130	90	8.44	171	6.137	787.2	13.1	45	0.16	34	0	1	4	1	1	0	0	0	1	0	0	0	0	54	33	30	49	29	0	0	4	1
0	0	0	1	0	0	M	63	23.94	0	86	0	0	0	104	128	76	12.61	323	0.074	1640	6.7	40	2.52	36	0	1	2	1	1	0	1	0	1	0	0	0	0	54	33	30	49	29	0	0	1	1
0	0	0	1	1	0	F	64	18.59	1	121	7	0	0	74	164	106	11.63	368	16	1030.27	5.13	43	3.32	37	0	1	4	1	0	0	0	0	1	1	0	1	0	53	36	31	50	25	0	0	103	0
0	0	0	1	0	0	F	56	28.58	0	147	5	0	0	136	140	81	19.98	250	6.176	6703.42	7.72	46	3.46	37	0	1	4	3	1	1	0	0	3	0	2	1	0	35	44	34	65	30	0	1	4	1
1	0	0	0	1	0	F	64	20.7	1	128	5	0	0	78	128	80	12.65	230	11.707	2069.05	15.21	40	3.95	38	0	1	4	2	1	1	0	0	1	0	0	0	0	51	33	28	37	26	0	1	79	0
1	0	0	0	1	0	F	33	28.28	1	116	5	0	0	105	127	82	15	214	9.061	1911.72	11.82	34	2.53	38	1	1	4	1	1	0	0	0	1	0	0	0	0	47	34	28	38	29	0	0	75	0
1	0	0	0	0	0	F	70	19.72	0	114	7	0	0	62	120	61	8.15	236	3.952	371.97	16.13	19	2.11	39	0	1	4	1	1	1	0	0	1	0	0	0	0	54	33	30	49	29	0	0	75	0
1	0	0	0	0	0	F	50	28.04	0	119	7	0	0	72	180	92	11.88	271	6.961	689.97	10.77	18	2.7	40	1	1	5	1	1	1	0	0	0	0	0	0	1	66	31	33	44	29	0	0	80	0
1	0	0	0	0	0	F	62	24.9	0	139	5	0	0	89	145	75	9.32	231	0.751	1017.92	7.3	37	4.08	40	1	1	5	1	0	1	0	0	1	0	1	0	1	68	30	32	49	29	0	1	69	0
1	0	0	0	0	1	F	48	23.62	1	138	4	0	0	88	158	78	8.22	212	7.06	141.88	4.97	30	2.69	41	0	1	5	1	0	1	0	0	1	0	1	0	1	66	30	29	44	27	0	0	68	0
1	0	0	0	1	0	F	79	18.97	0	124	5	0	0	92	150	84	13.89	250	16	626.22	7.9	36	3.61	41	1	1	5	1	0	1	0	1	1	0	0	0	0	54	33	30	49	29	0	0	2	1
1	0	0	0	0	1	F	72	23.94	0	115	3	0	0	101	104	67	10.41	169	9.793	7543.28	6.7	31	2.52	41	0	1	4	3	0	0	0	0	1	0	0	0	0	54	33	30	49	29	0	0	97	0
1	0	0	0	0	0	F	73	23.44	0	130	3	0	0	72	152	82	9.34	211	7.85	2497.16	6.52	43	2.91	41	1	1	4	1	0	1	0	0	1	0	0	0	1	58	33	33	53	30	0	1	101	0
1	0	0	0	0	0	F	63	24.65	0	117	3	0	0	100	102	60	10	167	14.945	319.59	5.82	185	1.77	42	1	1	4	1	0	1	0	0	0	1	0	0	1	56	31	30	44	33	0	1	89	0
1	0	0	0	1	0	M	60	22.83	1	123	5	0	0	104	145	82	14.46	255	16	678.4	9.11	70	1.97	42	0	1	4	1	1	1	0	0	1	0	1	1	0	45	36	31	46	30	0	1	75	0
0	0	0	1	0	0	F	53	25.39	0	101	5	1	0	68	134	72	7.26	151	1.551	2017.93	13.93	31	3.85	42	1	1	4	2	1	1	0	0	0	1	0	0	0	52	31	29	46	27	0	1	57	0
0	0	0	1	0	0	F	75	18.75	1	127	3	0	0	72	132	96	8.16	115	5.463	2351.19	10.31	69	2.04	42	0	1	5	3	0	0	0	0	1	0	0	0	0	49	34	31	46	31	0	1	32	1
0	0	0	1	0	0	F	68	24.44	0	103	0	0	0	114	104	62	12.44	362	11.539	14299.7	6.21	55	2.19	42	0	1	4	1	0	1	0	0	1	0	0	0	0	54	33	30	49	29	0	0	64	1
0	0	0	1	0	0	F	63	18.97	0	112	5	1	0	80	168	90	5.49	251	3.075	1798.33	4.51	18	2.14	42	0	1	5	1	0	1	0	0	0	1	0	0	0	51	36	31	54	27	0	1	80	0
1	0	0	0	0	0	F	78	22.83	0	104	1	0	0	81	128	76	10.42	226	16	2312.54	5.87	46	2.05	43	1	1	4	2	0	0	0	0	1	0	0	0	1	56	29	26	45	25	0	0	53	0
1	0	0	0	0	1	F	55	24.12	1	125	5	0	0	95	198	113	12.54	231	0.245	410.36	4.9	41	4.32	43	1	1	4	1	0	1	0	0	1	0	1	1	1	72	30	33	47	32	0	1	67	0
1	0	0	0	0	0	F	48	23.8	0	113	5	0	0	92	148	68	11.4	299	9.267	311.13	5.2	9	2.09	43	0	1	5	1	0	1	0	0	0	0	0	1	0	60	33	32	48	29	0	0	80	0
0	0	0	1	0	0	M	66	23.03	1	125	5	0	0	72	149	89	8.24	227	1.877	1470.38	4.74	15	2.43	43	0	1	4	1	0	1	0	0	0	2	0	0	0	69	30	31	50	31	0	0	64	0
0	1	1	1	1	0	F	64	24.65	0	118	5	0	0	88	176	88	8.75	169	16	2823.31	12.33	24	2.3	43	0	1	5	1	1	1	0	0	1	0	0	0	0	52	34	26	50	24	0	0	82	0
0	0	0	1	1	0	F	57	22.31	0	134	5	0	0	104	144	94	16.78	220	16	3846.46	8.91	53	3.98	43	0	1	4	1	1	1	0	0	2	0	2	0	0	38	36	30	59	29	0	0	93	0
1	0	0	0	0	0	F	69	25.39	0	117	1	0	0	66	157	70	8.17	284	10.466	2444.77	10.69	33	1.86	43	0	1	4	1	1	1	0	0	2	0	0	0	0	37	39	31	63	32	0	0	70	0
1	0	0	0	0	1	F	72	19.03	0	110	5	0	0	72	128	76	6.81	180	1.748	934.04	9.22	17	1.71	44	1	1	5	1	0	1	0	0	1	2	1	0	1	60	33	28	46	32	0	0	6	1
1	0	0	0	1	0	F	65	21.12	0	141	5	0	0	79	150	90	6	195	0.117	1106.88	6.7	45	2.52	45	0	1	4	1	0	1	0	0	0	0	1	0	0	51	29	28	44	25	0	0	79	0
0	0	0	1	1	0	F	64	20.55	0	144	5	0	0	90	140	90	9.44	236	5.665	2160.4	10.48	17	5.18	45	1	1	4	1	1	1	0	0	0	0	0	0	0	48	33	31	48	25	0	0	94	0
0	0	0	1	0	0	F	55	24.61	1	133	3	0	0	77	120	70	9.17	315	0.953	2638.76	12.14	40	2.54	45	0	1	4	1	1	0	0	0	1	0	0	0	0	54	33	30	49	29	0	0	83	0
0	0	0	1	0	0	F	73	21.23	1	105	1	0	0	46	104	62	8.84	136	9.697	3977.19	6.84	79	1.84	45	0	1	4	1	1	0	0	0	1	0	0	0	0	54	33	30	49	29	0	1	88	0
0	0	0	1	1	1	F	59	21.37	0	134	5	0	0	67	126	70	10.21	184	2.495	858.32	7.38	18	3.46	45	0	1	4	1	0	0	0	0	0	0	1	0	0	59	28	32	50	33	0	0	89	0
1	0	0	0	0	0	F	65	25.89	0	125	5	0	0	75	145	83	4.63	172	7.24	457.79	9.33	26	2.44	46	0	1	7	1	1	1	1	0	1	1	1	0	1	61	28	30	41	29	0	0	81	0
0	0	0	1	1	0	M	78	20.83	1	115	4	0	0	73	118	54	17.14	285	16	2867.96	6.68	47	2.59	46	0	1	4	3	0	1	0	0	0	0	1	0	0	44	28	31	48	28	0	0	1	1
1	0	0	0	1	1	F	70	18.49	0	136	5	0	0	62	140	87	12.08	40	1.886	624.21	11.76	32	2.26	46	1	1	5	1	1	1	0	0	0	0	0	0	0	46	28	21	49	21	0	0	47	0
0	0	0	1	0	0	F	70	17.78	0	121	4	0	0	65	106	70	10	200	8.018	2078.63	5.99	28	3.02	46	0	1	5	1	0	1	0	0	1	0	0	0	0	54	33	30	49	29	0	0	85	0
0	0	0	1	0	0	M	49	20.2	1	83	3	0	0	63	138	83	15.43	446	16	1910.67	7.47	64	2.82	46	1	1	5	1	0	0	0	0	1	0	1	0	0	55	35	33	53	30	0	1	66	0
1	0	0	0	1	0	F	70	23.33	0	126	5	0	0	92	102	72	15.68	247	2.8	2638.76	6.91	56	3.07	47	0	1	4	2	1	1	1	0	1	0	0	0	0	54	33	30	49	29	0	0	11	1
1	0	0	0	0	0	M	67	22.03	1	159	5	0	0	75	124	76	15.88	237	16	3916.68	5.43	37	2.87	47	1	1	4	1	0	0	0	0	1	0	0	0	0	54	33	30	49	29	0	0	93	0
0	0	0	1	1	0	F	79	20.44	1	124	0	0	0	70	99	58	14.54	317	10	3650	4.35	57	2.52	47	0	1	4	1	0	1	1	0	2	0	0	1	0	44	35	23	53	27	0	0	80	0
1	0	0	0	0	0	F	70	43.56	0	90	5	0	0	70	120	66	8.25	405	16	1401.19	7.02	27	2.3	48	0	1	5	2	1	1	0	0	1	0	0	0	1	52	28	28	40	27	0	1	47	0
1	0	0	0	0	0	F	59	19.78	0	95	5	0	0	88	118	74	5.85	423	0.613	214.69	4.37	31	6.19	48	1	1	7	2	0	1	0	0	1	0	0	0	0	54	33	30	49	29	0	0	29	1
1	0	0	0	0	0	F	51	24.89	0	128	5	0	0	72	116	68	11.07	294	16	424.38	6.13	35	2.83	48	1	1	4	1	0	1	0	0	1	0	0	0	0	54	33	30	49	29	0	0	91	0
0	0	0	1	0	1	F	62	23.94	0	122	0	0	0	78	118	69	6.8	184	7.1	2638.76	6.7	13	2.52	48	1	1	5	4	0	0	1	0	1	0	0	0	0	54	33	30	49	29	0	0	1	1
0	0	0	1	0	0	M	68	16.12	1	121	5	0	1	104	104	69	5.88	165	5.748	5433.39	4.73	16	1.72	48	1	1	4	2	0	0	0	0	0	0	0	0	0	54	33	30	49	29	0	0	82	0
1	1	1	0	1	0	M	60	20.62	1	137	5	0	0	80	126	76	7.92	173	14.716	1265.75	7.23	62	4.09	48	1	1	5	1	0	0	0	0	1	0	1	0	0	60	32	27	51	25	0	0	87	0
0	0	0	1	0	1	F	65	22.48	0	150	5	1	0	103	103	98	11.02	271	1.209	1920.09	9.32	57	1.8	48	0	1	4	1	1	0	0	0	1	0	0	0	0	34	33	26	52	27	0	1	4	1
0	0	0	1	0	0	F	74	17.78	0	104	3	0	0	66	134	70	11.55	216	16	2435.57	6.26	51	3.79	48	0	1	5	1	0	0	0	0	0	1	1	0	0	40	35	29	52	29	0	1	77	0
0	0	0	1	0	0	F	66	21.23	0	105	7	0	0	66	148	90	8.54	265	1.955	757.71	6.82	24	3.04	49	1	1	5	1	0	1	0	0	0	0	0	0	1	62	28	26	38	25	0	1	68	0
1	0	0	0	0	0	F	61	21.21	0	121	5	0	0	74	145	95	11.01	289	2.08	243.9	5.25	45	3.47	49	1	1	5	2	0	0	0	0	0	0	0	0	1	66	29	30	41	28	0	0	52	0
0	0	0	1	0	0	F	45	28.94	0	148	5	0	0	65	129	75	9.57	213	2.187	813.83	8.72	33	3.98	49	1	1	4	1	1	1	0	0	1	0	0	0	0	63	28	26	42	26	0	0	62	0
1	0	0	0	0	0	M	62	19.83	1	135	7	0	0	63	158	98	6.7	195	0.241	2638.76	4.8	8	1.72	49	0	1	4	1	0	1	0	0	1	0	1	0	0	68	34	30	42	29	0	0	27	1
0	0	0	0	0	0	F	57	22.54	0	144	7	0	0	64	170	90	7.31	171	0.001	153.76	5.3	14	1.07	49	1	1	4	1	0	1	0	0	1	1	1	0	0	64	27	25	43	25	0	0	76	0
1	0	0	0	1	0	F	47	27.55	1	135	5	0	0	64	132	84	10.93	353	16	1116.41	5.2	19	2.99	49	1	1	4	1	0	1	0	0	0	0	1	0	0	74	30	31	46	31	0	0	79	0
0	0	0	1	0	0	F	61	25.97	0	129	7	0	0	62	170	87	7.24	222	0.031	1135.13	6.7	35	1.91	49	1	1	4	1	1	1	0	0	2	1	1	0	0	50	33	29	48	30	0	0	81	0
1	0	0	0	0	0	F	77	19.72	0	126	3	0	0	72	118	76	15.97	293	9.425	334.04	6.76	37	1.86	49	1	1	4	1	0	0	0	0	1	0	0	0	0	54	33	30	49	29	0	1	67	0
1	0	0	0	0	0	F	55	24.64	0	115	7	0	0	75	130	80	8.19	220	3.957	1379.41	6.7	17	1.95	50	0	1	4	1	0	1	0	0	1	0	1	0	0	71	30	27	40	27	0	0	83	0
1	0	0	0	0	0	M	62	24.44	0	130	3	0	0	70	110	70	8.35	263	0.636	382.16	5.11	99	3.63	50	1	1	4	1	0	0	0	0	0	0	1	0	0	72	30	29	42	29	0	1	59	0
0	0	0	1	1	0	F	77	18.41	0	118	3	0	0	89	128	76	13.05	123	11.868	7931.51	5.66	86	2.23	50	0	1	4	2	0	1	0	0	1	1	1	0	0	35	33	33	44	23	0	0	49	1
0	0	0	1	0	0	F	72	21.63	0	126	3	0	0	115	126	74	7.84	247	3.153	2711.23	6.93	23	2.15	50	0	1	4	1	1	0	0	0	0	1	0	0	0	50	28	25	45	22	0	0	74	0
0	0	0	0	1	0	F	49	23.5	0	122	5	0	0	55	136	74	9.53	154	4.103	1984.36	3.93	51	2.35	50	1	1	4	1	1	1	0	0	1	0	0	0	1	70	32	29	47	30	0	0	98	0
1	1	1	0	0	0	M	49	27.34	1	170	5	0	0	65	160	100	7.48	205	0.275	145.82	6.52	34	2.78	50	0	1	4	1	0	0	0	0	1	0	0	0	0	54	33	30	49	29	0	0	78	0
1	0	0	0	0	0	F	56	30.82	0	136	5	0	0	79	120	70	8.8	208	13.311	2638.76	5.76	32	4.07	50	1	1	4	1	1	1	0	0	0	0	1	0	1	63	36	32	49	33	0	0	87	0
0	0	0	1	1	0	F	71	26.67	1	117	5	0	0	80	102	55	10.01	211	4.294	3295.79	5.25	26	2.7	51	1	1	5	1	0	0	0	0	0	1	0	1	0	41	29	27	41	25	0	0	70	0
0	0	0	1	0	1	F	48	23.73	0	124	5	0	0	99	108	70	9.74	277	16	2442.68	7.51	51	3.3	51	1	1	5	1	1	0	0	0	0	0	0	0	1	55	29	26	44	31	0	1	47	0
0	0	0	1	0	0	F	74	23.44	0	124	3	0	0	106	140	86	10.62	286	1.515	4442.65	5.99	21	2.57	51	0	1	5	1	0	0	0	0	0	2	1	0	0	60	30	28	45	30	0	0	79	0
1	0	0	0	0	0	F	65	22.89	0	103	1	0	0	78	106	62	8.73	98	4.727	160.39	12.95	55	0.91	51	1	1	7	1	0	0	0	0	1	0	0	0	0	50	30	30	48	32	0	0	80	0
1	0	0	0	0	0	F	75	22.89	0	111	5	1	0	82	153	56	4.36	151	0.265	1388.41	5.73	29	1.99	51	0	1	4	1	1	0	0	0	1	0	0	0	0	54	33	30	49	29	0	1	44	0
1	0	0	0	1	0	F	54	26.3	0	96	7	0	0	87	173	82	7.42	284	1.451	1954.07	5.55	19	2.05	51	1	1	4	1	0	1	0	0	1	0	0	0	0	54	33	30	49	29	0	1	63	0
0	0	0	1	0	0	F	62	23.12	0	112	1	1	0	69	147	84	6.47	180	16	2124.59	9.17	36	2.95	51	0	1	5	1	1	1	1	0	1	0	0	0	0	54	33	30	49	29	0	1	76	0
1	0	0	0	1	0	M	45	24.8	1	150	5	0	0	96	146	106	17.37	206	16	28.54	6.98	119	3.49	51	0	1	5	1	0	1	0	0	1	0	1	0	0	50	36	29	59	28	0	0	81	0
1	0	0	0	0	0	F	59	24.97	1	130	5	0	0	70	145	95	7.36	218	0.168	1829.56	5.61	11	3.35	52	1	1	5	1	0	0	0	0	0	0	0	0	1	54	32	32	38	28	0	0	45	0
0	0	0	1	1	1	F	59	22.89	0	119	5	0	0	72	100	58	11.66	177	0.098	2638.76	8.86	114	0.91	52	0	1	5	1	1	1	0	0	0	0	0	0	0	40	22	25	42	20	0	0	70	0
0	0	0	1	1	0	F	73	21.33	0	127	5	0	0	86	137	76	8.67	185	5.8	11066.5	4.83	20	2.17	52	1	1	5	4	1	1	0	0	1	1	1	1	0	37	30	30	43	23	0	1	55	0
1	0	0	0	0	0	F	71	26.67	0	98	5	0	0	72	127	65	7.81	393	1.287	719.02	7.2	14	3.13	52	0	1	4	1	1	1	0	0	1	0	1	0	1	73	27	27	45	26	0	0	76	0
1	0	0	0	0	0	F	53	27.34	0	134	1	0	0	72	126	56	5.78	191	1.472	256.18	5.29	21	1.77	52	0	1	5	1	0	0	0	0	0	0	1	0	0	69	31	29	47	29	0	0	63	0
0	0	0	1	0	0	F	71	20.13	1	108	1	0	0	75	124	92	4.81	215	0.017	582.76	4.71	19	2.83	52	0	1	5	1	0	0	0	0	1	1	1	0	0	60	29	29	47	28	0	0	81	0
1	0	0	0	0	0	F	69	19.78	1	113	3	1	0	72	111	77	10.7	231	13.034	4076.48	9.67	60	2.08	52	1	1	5	1	1	0	0	0	0	0	0	0	0	39	25	29	48	30	0	0	47	0
0	0	0	1	0	0	F	87	23.94	0	127	0	0	0	107	109	75	7.77	140	0.39	5220	4.59	13	1.86	52	0	1	4	3	0	1	0	0	1	0	0	0	0	54	33	30	49	29	0	0	1	1
1	0	0	0	0	0	F	72	19.81	0	99	5	0	0	72	112	60	10.56	158	11.229	2885.78	5.42	38	2.66	53	1	1	4	3	0	1	0	0	0	1	0	0	0	67	32	26	42	24	0	0	83	0
0	0	0	1	1	0	F	62	25.51	0	133	5	0	0	90	100	60	12.3	350	16	1970.18	6.7	45	2.52	53	1	1	4	3	0	0	0	0	0	0	0	0	0	39	36	28	44	25	0	0	78	0
1	0	0	0	1	0	F	35	22.31	0	122	3	0	0	70	100	76	6.1	204	11.076	447.61	6.7	27	2.06	53	0	1	5	1	0	0	0	0	0	0	0	0	0	69	24	28	45	27	0	0	69	0
0	0	0	1	0	1	M	42	26.12	0	140	5	0	0	103	151	95	8.9	208	1.136	1	16.08	25	1.27	53	1	1	4	1	1	1	0	0	1	0	1	0	0	55	32	31	46	32	0	0	49	0
1	0	0	0	0	0	M	40	23.92	1	151	5	1	0	50	119	89	11.55	208	16	1	10.79	119	1.53	53	0	1	4	4	1	0	0	0	0	0	0	0	1	66	30	28	47	28	0	0	83	0
1	1	0	0	0	0	F	65	25.56	0	129	7	0	0	78	150	86	5.06	167	0.13	1736.62	10.03	60	0.59	53	1	1	5	1	1	1	0	0	0	0	0	1	1	64	27	26	47	26	0	0	45	1
0	1	1	0	0	0	F	82	23.83	0	114	5	0	0	73	127	77	5.36	177	6.957	3559.57	5.03	16	3.93	53	0	1	4	2	0	1	1	0	1	1	1	0	0	45	34	27	47	28	0	1	59	0
0	0	0	1	1	1	F	67	27.53	0	129	5	0	0	68	111	75	16.23	238	16	698.82	11.46	100	2.77	53	1	1	4	2	0	1	0	0	1	1	0	0	0	43	29	25	48	23	0	1	48	1
0	0	0	1	1	0	F	55	23.33	0	144	7	0	0	92	152	76	11.37	191	7.906	1507.53	6.7	42	4.2	53	0	1	5	1	1	1	0	0	1	0	0	0	0	54	33	30	49	29	0	0	70	0
1	0	0	0	1	0	F	62	22.22	0	112	1	0	0	96	131	78	6.41	236	14.441	15000	6.5	20	1.63	53	0	1	4	1	0	0	0	0	1	0	0	0	0	60	31	33	53	34	0	0	87	0
0	1	1	1	1	0	M	50	23.88	1	124	5	0	0	96	104	65	9.28	314	16	4844.98	14.7	13	1.46	53	1	1	4	2	1	0	0	0	1	1	1	0	0	43	34	33	54	34	0	0	51	0
1	0	0	0	0	0	M	66	23.62	0	139	5	0	0	103	122	73	7.92	152	0.089	4173.44	4.7	69	1.97	53	0	1	4	2	1	1	1	0	3	1	0	0	0	31	35	33	56	28	0	0	71	0
0	0	0	1	0	0	M	59	23.81	1	139	5	0	0	78	113	75	13.68	219	16	336.97	8.93	45	2.26	54	1	1	5	1	1	1	0	0	0	0	1	0	1	67	36	28	44	30	0	1	44	0
0	0	0	1	1	0	F	75	22.03	1	121	1	0	0	96	126	74	16.56	384	16	3950.91	8.41	33	2.28	54	0	1	7	3	1	1	0	0	0	0	1	0	1	65	28	31	45	30	0	1
1	0	0	0	0	0	F	81	25.71	0	125	4	0	0	82	144	87	7.8	309	13.363	13819.2	5.44	12	2.67	54	0	1	4	3	0	1	0	0	2	0	0	0	1	43	37	25	46	27	0	0	55	1
0	0	0	1	0	1	M	60	27.34	1	127	7	0	0	88	128	76	8.32	203	1.677	174	5.02	40	3.36	54	1	1	5	1	1	1	1	0	1	0	0	0	0	52	32	30	47	27	0	1	46	0
1	0	0	0	1	0	F	65	21.64	0	127	7	0	0	59	124	80	9.16	116	16	1806.48	4.79	130	2.84	54	1	1	4	1	0	1	0	0	1	1	1	0	1	70	36	31	48	29	0	0	99	0
1	0	0	0	0	0	M	54	29.38	1	132	5	0	0	64	102	78	8.8	188	8.151	227.49	10.37	61	2.77	54	1	1	5	1	1	0	0	0	0	0	0	0	1	54	33	30	49	29	0	0	82	0
0	0	0	1	0	0	F	75	17.26	1	119	1	0	0	84	118	70	11.33	215	13.198	1083.57	6.25	54	1.95	54	0	1	4	4	0	0	0	0	1	0	0	0	0	54	33	30	49	29	0	0	4	1
0	0	0	1	0	0	F	70	26.67	0	134	5	0	0	125	136	90	11.75	322	1.661	9073.48	20.97	21	6.52	54	0	1	4	1	1	1	0	0	1	0	0	0	0	54	33	30	49	29	0	1	80	0
0	0	0	1	1	0	F	74	20.55	0	121	3	0	0	72	120	76	4.06	86	3.479	2018.07	5.47	45	2.52	54	1	1	4	1	0	1	0	0	1	0	2	0	1	52	27	30	50	31	0	0	97	0
0	0	0	1	0	0	F	49	25.6	0	144	1	0	0	68	123	72	8.7	266	0.05	906.3	4.63	45	1.58	55	0	1	4	1	0	1	0	0	1	0	1	0	1	66	30	27	40	27	0	0	49	0
0	0	0	1	1	0	M	76	23.8	0	127	5	0	1	88	131	87	10.25	156	16	4675.73	5.44	35	3.12	55	1	1	5	1	0	0	1	0	1	1	3	0	0	63	44	42	42	27	0	0	79	0
0	0	0	1	0	1	M	59	23.88	1	137	1	0	0	98	138	86	12.41	237	1.061	20.07	6.86	40	3.36	55	1	1	4	1	0	0	0	0	0	0	0	1	1	63	34	27	44	28	0	1	71	0
1	0	0	0	0	0	F	62	26.67	0	138	5	0	0	66	110	70	11.38	230	0.002	118.7	5.54	11	2.01	55	0	1	4	1	0	1	0	0	1	0	1	1	1	66	34	32	47	27	0	0	78	0
1	0	0	0	1	0	F	67	23.23	0	115	5	0	0	80	144	76	6.93	95	16	1661.28	5.13	39	3.59	55	1	1	4	2	0	1	0	0	2	1	2	1	1	57	37	28	48	27	0	1	100	0
1	0	0	0	0	0	F	86	18.67	1	108	0	0	0	88	120	75	11.91	161	16	2513.69	8.74	101	2.3	55	0	1	7	4	0	1	0	0	1	0	1	0	1	60	31	31	48	30	0	0	4	1
0	0	0	1	1	0	M	72	20.96	1	132	3	0	0	70	109	69	6.3	123	15.628	644.52	5.2	43	2.52	55	0	1	4	1	0	1	0	0	1	0	0	0	0	54	33	30	49	29	0	1	71	0
0	0	0	1	1	0	F	72	20.55	0	97	5	0	0	76	168	76	8.79	218	2.37	1572.81	9.25	54	1.23	55	1	1	4	1	1	1	0	0	1	0	0	0	0	54	33	30	49	29	0	0	2	1
0	0	0	1	0	0	F	61	19.31	1	124	5	0	0	85	128	84	7.52	326	4.2	2880	4.98	21	3.37	55	1	1	5	1	0	1	0	0	3	1	2	1	0	30	40	45	58	38	0	0	77	0
1	0	0	0	0	0	F	78	23.94	0	132	5	0	0	106	146	76	4.54	151	0.714	15000	5.14	102	1.81	55	0	1	4	4	0	1	0	0	3	0	1	0	0	33	38	37	66	31	0	0	65	1
0	0	0	1	0	1	F	61	22.27	0	120	3	0	0	58	86	50	15.75	226	16	674.94	16.08	125	2.51	56	1	1	5	1	1	1	0	0	1	0	0	0	1	54	30	33	37	34	0	0	48	0
1	0	0	0	0	0	F	50	27.12	0	130	5	0	0	82	119	73	6.21	186	0.713	1342.72	15.8	48	1.83	56	1	1	4	1	1	0	0	0	1	1	0	0	0	50	29	25	42	28	0	0	46	0
1	0	0	0	0	0	F	62	24.14	0	117	5	0	0	75	100	61	13.35	305	16	838.28	10.29	85	3.95	56	0	1	4	1	1	1	0	0	2	1	1	0	0	53	25	28	43	26	0	0	35	1
1	0	0	0	0	1	F	67	22.71	1	143	5	0	0	62	152	84	8.67	207	10.517	1495.34	5.3	27	3.2	56	0	1	4	1	1	1	0	0	0	0	0	0	0	63	30	30	43	29	0	0	84	0
0	0	0	1	0	0	F	58	22.97	0	144	5	0	0	60	140	86	5.24	129	1.34	300.8	5.76	39	2.2	56	1	1	4	1	0	1	0	0	0	1	0	0	0	70	31	29	45	26	0	0	69	0
0	0	0	1	1	0	F	71	24.97	0	70	0	0	0	114	86	62	4.11	190	13	1150	9.12	7	1.15	56	0	1	5	4	0	0	0	0	0	1	1	0	0	28	27	24	46	28	0	0	1	1
1	0	0	0	0	1	M	37	27.28	1	166	5	0	0	84	139	79	7.73	183	14.881	457.87	5.15	57	2.4	56	1	1	7	1	1	0	0	0	0	0	0	0	0	74	31	31	48	30	0	1	87	0
0	0	0	1	0	0	M	56	16.9	1	107	0	0	0	74	109	48	7.58	241	9.787	500.99	5.64	45	1.52	56	1	1	5	1	0	0	0	0	0	0	0	0	1	66	36	31	48	28	0	0	69	0
0	0	0	1	0	0	F	73	24.46	0	125	7	0	0	90	139	82	4.22	155	1.043	1816.67	4.76	78	1.76	56	0	1	5	2	0	1	0	0	2	0	1	0	1	57	36	33	49	30	0	0	49	0
1	0	0	0	1	0	F	71	24.09	0	133	5	0	0	96	118	68	16.04	270	5.581	2439.12	7.8	54	2.13	56	0	1	5	1	0	0	0	0	1	0	1	0	0	48	26	31	49	26	0	0	73	0
1	0	0	0	0	0	F	62	22.51	0	118	7	1	0	115	156	101	11.84	247	13.205	15000	4.78	29	3.23	56	0	1	4	2	0	1	0	0	1	0	0	0	0	54	33	30	49	29	0	1	38	1
1	0	0	0	1	0	F	65	19.59	0	69	5	0	0	104	100	76	10.59	506	16	11888.9	4.05	44	2.44	56	0	1	4	1	0	0	0	0	3	1	2	1	1	43	36	37	50	33	0	1	1	1
0	0	0	1	0	0	F	55	20	0	117	5	1	0	86	110	74	7.93	196	1.05	720.39	5.48	13	2.62	56	0	1	4	1	0	1	0	0	1	0	0	0	1	57	35	27	53	24	0	1	99	0
1	0	0	0	0	1	F	55	22.43	0	106	0	0	0	56	144	76	7.7	155	16	174.87	6.15	36	1.63	56	1	1	4	1	0	0	0	0	1	1	0	0	1	56	35	30	59	23	0	1	100	0
1	0	0	0	0	0	F	47	21.34	0	121	5	0	0	70	123	83	4.99	248	0.281	257.71	5.94	115	1.63	57	1	1	4	1	0	1	0	0	0	0	1	0	0	67	31	28	39	28	0	0	79	0
1	0	0	0	0	0	F	61	20.03	0	117	5	0	0	82	156	67	8.72	199	1.611	491.77	5.72	36	2.01	57	1	1	5	2	0	1	0	0	0	0	0	0	0	47	26	26	43	26	0	0	45	0
0	0	0	1	1	0	F	57	22.19	0	129	3	0	0	73	129	79	8.05	201	16	579.98	5.07	45	2.52	57	1	1	5	1	0	0	0	0	0	0	0	0	1	61	27	29	44	26	0	0	68	0
0	1	1	1	1	0	F	74	21.37	0	117	7	0	0	70	156	90	5.29	238	12.34	762.31	6	23	2.32	57	1	1	4	1	0	1	0	0	0	0	1	0	1	61	31	30	44	28	0	0	54	1
1	0	0	0	0	0	F	60	24.44	0	129	5	0	0	83	83	54	9.03	202	1.863	3131.29	6.8	43	1.91	57	1	1	4	1	0	0	0	0	1	0	0	0	0	52	30	27	44	24	0	1	64	0
0	0	0	1	1	0	F	71	21.4	0	117	1	0	0	68	136	76	7.57	265	16	1529.84	6.94	53	4.04	57	0	1	4	2	0	0	0	0	1	0	1	0	1	62	35	29	45	27	0	0	100	0
0	0	0	1	1	0	F	73	20.31	0	109	5	0	0	95	125	87	12.25	376	6.111	7590.84	6.36	40	3.44	57	1	1	5	2	0	1	0	0	1	0	1	0	0	44	35	26	48	27	0	1	48	0
0	0	0	1	0	0	M	58	21.26	1	134	5	1	0	80	120	80	13.56	165	0.356	335.2	5.11	13	2.15	57	0	1	4	1	0	0	0	0	1	0	1	1	0	60	27	27	49	27	0	1	82	0
0	0	0	1	1	1	M	35	22.49	1	159	5	0	0	73	128	76	14.08	226	16	750.26	5.91	43	1.6	57	1	1	5	1	0	0	0	0	1	0	1	0	0	61	29	26	49	25	0	1	46	0
1	0	0	0	0	0	M	66	24.22	1	144	3	0	0	72	120	74	6.86	122	16	1385.69	6.61	41	3.28	57	1	1	4	1	0	0	0	0	1	0	0	0	0	54	33	30	49	29	0	0	82	0
1	0	0	0	0	0	F	64	22.5	0	143	5	0	0	60	106	54	9.62	299	2	2638.76	16.34	21	1.98	57	0	1	4	1	1	1	0	0	1	0	0	0	0	54	33	30	49	29	0	0	75	0
1	0	0	0	1	0	F	74	21.43	0	127	0	0	0	80	91	66	5.7	191	16	3581.13	3.86	40	3.15	57	0	1	5	1	0	0	0	0	1	1	1	1	0	49	35	32	49	25	0	0	82	0
0	0	0	1	0	0	M	67	23.94	1	124	0	0	0	117	94	69	10.03	96	13.922	4977.96	6.7	88	3.36	57	0	1	4	4	0	0	0	0	1	0	0	0	0	54	33	30	49	29	0	0	67	0
0	0	0	1	0	0	F	59	22.73	0	132	5	0	0	119	120	80	17.28	186	2.964	5876.52	6.28	23	2.07	57	0	1	4	3	1	1	0	0	1	0	1	1	1	50	36	22	50	34	0	1	99	0
1	0	0	0	0	1	M	63	19.03	1	142	3	0	0	90	152	91	7.05	119	0.033	305.71	5.85	45	2.3	58	1	1	4	1	0	0	0	0	0	0	1	1	0	67	29	23	40	23	0	1	61	0
0	0	0	1	1	0	F	78	25.39	0	147	5	0	0	65	130	70	6.59	200	16	2278.43	3.7	51	3.96	58	1	1	4	1	0	1	0	0	0	0	0	0	1	50	32	30	40	22	0	0	101	0
1	0	0	0	1	0	F	75	21.33	0	115	5	0	0	78	128	88	9.48	160	5.142	5155.18	5.92	84	3.04	58	0	1	4	1	0	1	0	0	2	0	0	0	0	46	33	26	47	25	0	0	86	0
0	0	0	1	1	0	F	61	20.83	0	122	3	0	0	78	124	80	15.2	218	16	15000	7.06	39	3.99	58	0	1	5	3	0	0	0	0	1	0	1	1	0	29	35	35	48	32	0	1	14	1
0	0	0	1	0	0	F	69	28.3	0	117	6	0	0	93	126	68	5.21	160	0.212	156.36	3.5	14	1.98	58	1	1	4	1	1	1	1	0	1	0	0	0	0	54	33	30	49	29	0	0	54	0
1	0	0	0	0	1	F	77	25.48	0	98	5	0	0	56	110	56	12.81	198	0.05	327.16	7.39	32	1.67	58	1	1	4	1	0	1	0	0	1	0	0	0	0	54	33	30	49	29	0	0	69	0
1	0	0	0	0	0	F	63	20	0	108	1	0	0	62	134	72	10.81	196	4.089	949.31	6.37	26	1.38	58	1	1	4	1	0	1	0	0	1	0	0	0	0	54	33	30	49	29	0	0	75	0
1	0	0	0	1	0	M	45	27.04	1	165	5	0	0	78	147	87	14.2	222	8.957	860.24	5.93	63	3.35	58	0	1	4	1	1	0	0	0	1	0	1	0	1	71	32	33	50	29	0	0	68	0
0	0	0	1	1	1	M	63	21.77	1	125	5	0	0	83	127	81	13.08	283	16	3249.18	7.18	136	2.4	58	1	1	5	2	0	0	0	0	1	0	0	0	0	47	26	32	50	24	0	0	69	0
0	0	0	1	1	1	M	60	21.45	1	150	5	0	0	204	120	80	6.19	180	0.066	788.55	5.39	27	1.1	58	0	1	4	1	0	0	0	0	1	1	1	0	1	55	33	33	51	31	0	0	63	0
0	0	1	0	0	1	M	70	26.21	1	156	5	0	0	72	160	108	6.73	84	0.001	49.84	6.48	29	1.99	58	1	1	4	1	0	1	0	0	0	1	0	1	1	78	31	30	54	26	0	0	99	0
0	0	0	1	1	0	M	62	22.15	1	132	5	0	0	68	80	50	6.52	283	16	1499.98	5.61	38	2.92	58	1	1	4	1	0	0	0	0	0	1	1	1	1	57	33	32	54	33	0	0	91	0
1	0	0	0	1	1	M	58	25.71	1	148	3	0	0	70	83	60	13.57	190	4.2	3610	5.83	102	5.1	58	0	1	5	2	0	0	0	0	0	1	0	0	0	33	36	32	58	28	0	0	5	1
0	0	0	1	1	0	F	61	22.19	0	136	7	0	0	89	174	94	12.8	515	1.544	2434.69	6.35	21	1.41	59	1	1	5	1	0	1	0	0	0	1	0	0	0	60	27	25	36	27	0	0	77	0
0	0	0	1	1	0	M	88	20.76	1	118	3	0	0	85	114	68	5	161	11	2692.12	9.24	27	1.35	59	0	1	4	1	1	0	0	0	1	1	0	1	0	36	25	27	36	25	0	0	76	0
0	0	0	1	0	0	F	78	17.12	0	109	3	0	0	88	150	80	5.15	260	0.07	1492.19	4.41	14	1.27	59	0	1	5	1	0	0	0	0	0	1	1	0	0	57	22	23	37	24	0	0	76	0
1	0	0	0	0	0	M	66	24.22	1	124	4	0	0	82	173	93	11.74	230	16	961.06	4.78	38	2.86	59	0	1	5	1	0	1	0	0	1	0	1	1	1	67	31	32	41	29	0	1	84	0
0	0	0	1	1	0	M	63	24.91	1	179	5	0	0	70	131	83	9.5	192	16	1386.42	11.35	56	2.27	59	1	1	5	2	1	0	1	0	1	0	0	0	0	45	31	25	43	30	0	1	54	0
1	0	0	0	1	1	M	64	22.68	1	149	3	0	0	75	109	61	11.11	189	0.037	1	8.47	52	2.25	59	1	1	5	1	1	0	0	0	0	0	0	0	0	65	30	25	44	26	0	0	61	0
0	0	0	1	0	0	M	54	19.45	0	143	5	0	0	82	95	61	8.36	234	1.397	855.03	6.54	20	4.4	59	1	1	7	1	0	0	0	0	0	0	0	0	0	56	30	30	44	30	0	1	58	0
0	0	0	1	0	0	F	69	23.92	0	130	4	0	0	63	143	78	8.38	135	2.259	881.14	7.23	25	2.91	59	1	1	4	2	0	1	0	0	2	1	0	0	1	56	30	28	45	27	0	0	53	0
0	1	0	0	0	0	M	51	24.22	1	124	7	0	0	114	124	86	12.79	315	5.202	2065.99	5.31	27	3.11	59	1	1	4	1	0	0	0	0	1	1	0	0	1	59	31	29	45	28	0	0	77	0
0	0	0	1	0	0	M	55	26.64	1	164	5	0	0	90	170	110	12.25	229	13.311	242.56	6.38	54	3.4	59	1	1	4	1	0	0	0	0	1	1	1	0	1	57	33	29	46	26	0	1	67	0
1	0	0	0	1	0	M	47	25.7	1	146	5	0	0	86	140	90	9.99	250	3.726	667.19	5.21	50	2.38	59	0	1	5	1	0	1	0	0	0	0	0	0	1	68	30	28	46	27	0	0	68	0
1	0	0	0	1	1	F	70	22.97	0	106	7	1	0	81	155	111	11.95	120	1.436	5040.28	16.2	28	3.03	59	1	1	4	4	1	1	0	1	1	0	1	0	0	41	35	31	46	31	0	1	58	1
1	0	0	0	0	0	F	72	25.89	0	124	3	0	0	76	173	117	5.27	139	16	6161.34	6.06	39	1.78	59	0	1	4	1	0	1	1	0	0	0	0	0	0	82	35	35	46	23	0	0	12	1
1	0	0	0	0	0	M	84	21.63	1	112	5	0	0	90	140	53	8.22	201	2.418	7571.6	7.2	47	2.39	59	1	1	5	2	0	1	0	0	1	1	0	0	0	57	40	35	46	33	0	0	39	1
1	0	0	0	1	0	F	67	28.76	1	132	1	0	0	56	130	80	5.08	253	0.001	663.92	5.69	22	2.93	59	0	1	7	1	0	1	0	0	1	0	0	0	0	60	39	30	48	28	0	1	60	0
1	0	0	0	0	0	M	53	30.46	0	132	7	0	0	78	158	98	10.8	155	16	593.82	14.05	39	2.58	59	0	1	4	2	1	1	0	0	1	0	0	0	0	54	33	30	49	29	0	0	41	1
1	0	0	0	0	1	F	75	22.6	0	116	3	0	0	74	126	85	10.44	238	16	757.53	5.73	38	1.93	59	1	1	4	1	1	1	0	0	1	0	0	0	0	54	33	30	49	29	0	0	57	0
1	0	0	0	0	0	F	74	28.06	0	139	7	0	0	73	148	80	4.72	260	0.642	922.43	3.95	89	2.79	59	0	0	4	1	0	1	0	0	1	0	0	0	0	54	33	30	49	29	0	0	95	0
0	0	0	1	1	0	F	64	19.53	0	115	5	0	0	84	104	61	9.96	260	15.064	2977.35	6.02	22	2.85	59	0	1	4	1	0	0	0	0	1	0	0	0	0	54	33	30	49	29	0	0	98	0
0	0	0	1	0	0	F	82	18.31	0	76	1	0	0	75	142	80	8.82	288	3.053	9479.43	6.31	31	2.87	59	0	1	2	1	0	0	0	0	1	0	0	0	0	54	33	30	49	29	0	0	83	0
1	0	0	0	1	0	F	58	24.22	0	123	7	0	0	60	140	88	8.45	221	10.376	715.44	6.05	35	2.7	59	0	1	4	1	0	1	0	0	1	0	1	0	0	62	38	34	52	35	0	0	91	0
1	0	0	0	1	0	M	57	22.48	1	154	7	0	0	66	166	94	7.67	205	12.52	1257.38	6.4	20	2.56	59	1	1	4	1	1	1	0	0	0	0	1	0	1	56	34	33	56	33	0	0	100	0
0	0	0	1	0	0	F	61	19.22	0	118	0	0	0	64	112	70	14.08	307	14.511	5651.28	9.85	38	1.46	60	1	1	4	4	0	0	0	0	0	0	1	1	1	68	32	31	33	28	0	0	66	0
0	0	0	1	1	0	F	53	25.81	0	147	5	0	0	82	150	80	8.65	248	0.036	612.32	4.46	26	3.19	60	1	1	4	1	0	0	0	0	1	1	1	0	1	60	29	30	40	29	0	1	50	0
0	0	0	1	0	0	F	76	19.81	1	115	7	0	0	64	140	81	3.25	108	5.916	1058.32	6.7	20	2.34	60	1	1	5	1	1	1	1	0	1	0	0	0	1	57	27	29	40	23	0	0	60	0
0	0	0	1	0	0	F	64	16	0	126	5	0	0	78	160	104	14.77	236	7.1	2638.76	10.49	13	2.39	60	1	1	4	1	1	1	0	0	0	1	0	0	1	72	31	31	40	29	0	0	97	0
0	0	0	1	0	0	F	51	25.39	1	124	5	0	0	64	140	72	12.27	308	15.046	275.19	4.75	27	3.87	60	0	1	7	1	1	1	0	0	0	0	0	0	1	70	29	27	42	28	0	0	78	0
0	0	0	1	0	0	M	50	23.03	1	142	5	0	0	98	156	106	11.69	280	0.273	106.51	6.7	45	2.52	60	1	1	5	2	0	0	0	0	1	0	0	0	0	43	32	33	43	29	0	1	75	0
1	0	0	0	1	0	F	70	16.87	1	115	3	0	0	96	98	74	12.32	144	4.554	406.65	7.69	143	2.73	60	1	1	5	4	1	0	0	0	1	1	1	0	0	44	28	27	43	27	0	0	18	1
0	0	0	1	1	0	F	53	19.03	0	116	5	0	0	72	120	70	15.91	252	16	327.44	9.66	98	2	60	1	1	5	1	0	0	0	0	0	1	0	0	0	40	24	22	45	25	0	1	2	1
1	0	0	0	0	0	F	62	20.31	0	149	5	0	0	83	147	98	11.16	310	0.247	2039.75	5.84	14	5.16	60	0	1	4	1	0	0	0	0	0	0	0	0	1	65	25	25	45	24	0	1	63	1
1	0	0	0	0	0	M	44	26.45	0	128	5	0	0	70	124	75	6.13	222	0.001	326.35	4.4	26	2.1	60	1	1	5	1	0	0	0	0	1	1	0	0	1	60	31	31	46	24	0	1	70	0
0	0	0	0	0	0	F	64	26.93	0	121	5	0	0	63	121	67	3.69	217	0.857	1810.17	4.93	14	3	60	0	1	5	1	1	1	0	0	1	0	0	1	0	65	27	34	46	28	0	1	74	0
1	0	0	0	0	0	F	73	22.89	0	128	5	0	0	79	146	76	10.31	334	10.915	1092.89	7.12	33	2.46	60	1	1	4	1	1	1	0	0	1	0	1	0	0	49	30	31	47	29	0	0	79	0
1	0	0	0	0	0	F	54	27.82	0	99	3	0	0	64	93	58	10.81	159	16	784.51	5.87	28	1.56	60	0	1	4	1	0	1	0	0	2	0	0	1	0	50	36	30	48	33	0	0	76	0
0	0	0	1	0	1	M	51	26.78	0	145	1	0	0	84	120	80	8.26	164	16	5566.69	11.1	38	2.85	60	1	1	4	4	1	0	0	0	0	0	0	0	1	61	30	31	48	28	0	0	83	0
0	0	0	1	0	1	M	37	25.51	1	140	5	0	0	83	119	79	7.21	268	14.635	1	5.92	26	2.52	60	1	1	5	1	0	0	0	0	0	0	0	0	1	54	33	30	49	29	0	0	71	0
0	0	0	1	0	0	M	38	26.07	1	169	5	0	0	68	140	92	7.33	237	0.009	20.48	4.44	35	2.85	60	1	1	4	1	0	0	0	0	1	0	0	0	0	54	33	30	49	29	0	0	69	0
0	0	0	0	0	0	M	68	32.84	1	93	7	0	0	102	145	70	15.05	540	0.335	629.69	7.14	29	2.66	60	0	1	4	1	0	1	0	0	1	0	0	0	0	54	33	30	49	29	0	0	81	0
0	1	0	0	0	0	M	36	23.53	0	154	5	0	0	90	104	68	13.07	100	16	1208.78	5.74	33	2.09	60	1	1	4	1	0	0	0	0	1	0	0	0	0	54	33	30	49	29	0	0	89	0
0	0	0	1	0	0	M	57	31.22	1	139	5	0	1	65	132	89	12.75	183	16	1884.2	5.07	79	3.32	60	0	1	4	1	0	1	0	0	1	0	0	0	0	54	33	30	49	29	0	0	100	0
0	0	0	1	1	0	F	57	22.66	0	156	0	0	1	82	110	70	17.61	308	11.47	162.51	9.29	144	4.14	60	0	1	4	4	0	1	0	0	1	1	1	0	0	41	36	26	52	27	0	0	1	1
1	0	0	0	0	0	F	69	21.64	0	117	3	0	0	42	80	56	13.8	129	16	2874.16	16.76	38	1.29	60	0	1	4	4	1	1	1	0	1	0	1	0	0	44	36	36	53	29	0	0	84	0
1	0	0	0	0	0	M	66	23.83	1	127	0	0	0	75	100	72	16.6	164	16	3338.46	4.67	32	2.16	60	0	1	5	1	0	1	0	0	1	0	0	0	0	53	36	31	53	31	0	0	3	1
0	0	0	1	0	0	M	57	22.15	1	138	0	0	0	81	90	68	12.16	137	16	2894.33	14.59	59	3.03	60	0	1	5	2	1	1	0	0	0	0	1	0	0	40	36	30	56	27	0	0	84	0
1	0	0	0	1	1	M	75	17.58	1	118	5	0	0	101	138	98	6.25	80	3.474	4022.58	10.39	32	1.5	60	0	1	4	2	1	1	0	0	1	1	0	1	0	39	41	33	58	28	0	0	7	1
0	0	0	1	0	0	M	73	24.65	1	115	1	0	0	91	138	76	11.77	296	0.001	5559.12	3.27	90	3.28	60	0	1	4	3	1	1	0	0	2	0	1	0	1	37	43	30	58	30	0	0	1	1
1	0	0	0	0	0	M	50	26.67	1	110	5	0	0	101	107	67	5.12	176	0.001	2365.37	6	32	3.66	60	0	1	2	2	0	1	0	0	2	1	1	1	0	46	48	36	65	35	0	0	93	0
0	0	0	1	0	0	M	79	17.78	0	117	5	0	0	60	111	58	7.31	288	11.63	7752.53	5.27	27	3	61	0	1	4	1	0	0	0	0	1	1	1	1	0	44	33	32	37	32	0	0	45	0
0	0	0	1	0	0	F	57	27.22	0	128	5	0	0	100	146	88	9.55	257	0.125	550.87	4.1	17	2.43	61	1	1	5	1	0	1	0	0	0	0	0	0	0	64	30	30	42	30	0	1	72	0
0	0	0	1	0	0	M	37	21.88	1	155	5	0	0	79	140	90	10.62	213	0.219	80.86	10.86	20	1.42	61	0	1	4	1	1	1	0	0	0	0	1	0	0	73	30	33	44	32	0	0	45	0
0	0	0	1	1	0	F	56	27.06	0	128	7	0	0	68	160	95	11.73	162	16	1806.8	4.96	40	2.81	61	1	1	4	1	0	0	0	0	0	0	0	0	1	52	35	26	44	31	0	0	99	0
0	0	0	1	1	1	M	62	21.85	1	133	5	0	0	56	146	75	11.56	210	0.99	1	9.75	21	2.66	61	1	1	7	1	1	1	0	0	0	0	0	0	1	65	29	32	45	31	0	1	48	0
0	0	0	1	0	1	M	55	19.03	0	133	0	1	0	78	92	71	6.58	174	1.994	2020	4.37	69	1.88	61	0	1	4	2	0	0	0	1	1	0	1	1	0	51	32	28	47	32	0	1	61	0
0	0	0	1	1	1	F	67	25.39	0	109	1	0	0	70	142	68	11.14	176	7.619	487.4	6.4	31	3.84	61	1	1	5	2	0	0	0	0	1	1	0	0	0	45	34	30	48	32	0	0	53	0
0	0	0	1	1	1	F	80	19.4	0	105	3	0	0	78	108	72	7.82	239	9.94	824.47	14.16	33	2	61	1	1	5	1	1	0	0	0	1	0	2	1	0	46	26	29	48	26	0	0	63	0
0	0	0	1	0	0	F	76	21.63	0	119	0	0	0	66	106	68	14.22	228	11.621	4812.98	5.28	39	4.03	61	1	1	5	1	0	1	0	0	1	0	0	1	0	48	38	28	48	32	0	1	42	1
0	0	0	1	0	0	M	41	24.24	1	152	0	0	0	75	98	70	14.64	240	11.037	291.46	7.88	34	2.98	61	1	1	4	1	0	0	0	0	0	0	0	0	0	54	33	30	49	29	0	0	73	0
1	0	0	0	0	0	M	51	22.11	1	127	1	0	0	62	134	70	5.36	107	11.848	1437.51	5.42	30	2.12	61	1	1	4	1	1	1	0	0	1	0	0	0	0	54	33	30	49	29	0	0	58	0
1	0	0	0	0	0	F	52	26.67	1	137	0	0	0	54	105	78	7.28	193	8.955	2275.28	6.41	70	1.87	61	1	1	5	1	0	1	0	0	1	0	0	0	0	54	33	30	49	29	0	1	68	0
0	0	0	1	0	0	M	44	31.14	1	140	5	0	0	72	134	82	7.2	186	13.008	2638.76	5.34	61	1.82	61	1	1	4	1	0	1	0	0	1	0	0	0	0	54	33	30	49	29	0	0	103	0
1	0	0	0	1	0	M	36	24.03	0	152	3	0	0	104	130	74	12.12	256	12.513	2486.68	6.2	52	5.62	61	1	1	5	1	0	0	0	0	1	0	0	0	0	46	29	28	51	28	0	1	66	0
0	0	0	1	1	0	M	46	20.9	1	118	5	0	0	72	128	76	9.26	208	16	473.3	6.7	63	2.52	61	1	1	4	1	0	0	0	0	0	0	0	0	0	61	39	32	52	30	0	0	62	0
0	0	0	1	0	0	M	63	24.03	0	138	5	0	0	70	127	83	10.61	181	16	2403.36	6.42	42	2.45	61	1	1	4	1	0	0	1	0	1	1	0	0	0	56	38	32	52	29	0	0	78	0
1	0	0	0	0	0	M	50	21.97	0	148	1	0	0	67	91	49	12.29	262	1.932	3756.11	5.55	11	3.74	61	0	1	5	2	0	0	0	0	2	0	0	1	1	59	38	34	58	30	0	0	55	0
1	0	0	0	0	1	M	58	21.72	1	118	3	0	0	77	102	60	14.61	212	4.929	21.43	4.43	13	2.52	62	0	1	7	2	0	0	0	0	0	0	0	0	0	71	32	29	41	30	0	1	59	0
0	0	0	1	0	0	M	57	20.96	1	141	3	0	0	78	132	65	14.29	210	7.7	231	6.18	94	2.14	62	1	1	4	1	0	0	0	0	0	2	0	0	1	77	31	27	41	26	0	0	73	0
0	0	0	1	0	0	M	65	24.24	0	147	5	0	0	66	110	80	6.63	188	0.025	2638.76	5.45	35	2.98	62	1	1	5	1	0	1	0	0	0	0	0	0	0	77	31	31	41	28	0	0	80	0
0	0	0	1	1	0	M	51	28.04	1	138	5	1	0	90	152	82	9.85	207	16	522.32	7.6	54	2.3	62	1	1	4	2	0	1	0	0	0	0	0	0	0	51	33	28	42	31	0	1	62	0
0	0	0	0	1	0	F	50	17.53	0	128	5	0	0	70	170	100	14.54	219	13.9	5639.51	5.56	32	2.05	62	1	1	4	1	0	1	0	0	1	0	1	0	0	48	31	31	43	28	0	0	50	0
1	0	0	0	1	1	F	64	19.15	0	127	1	0	0	72	114	71	9.55	218	16	1412.72	5.77	79	1.9	62	1	1	7	1	0	0	0	0	1	1	1	1	0	47	28	24	44	25	0	0	61	0
0	0	0	1	1	0	M	62	22.37	1	123	5	0	0	90	121	71	6.49	315	0.11	2126.35	5.51	23	1.62	62	1	1	4	1	1	1	1	0	0	0	0	0	1	57	32	31	44	27	0	1	68	0
1	0	0	0	0	0	F	65	21.93	0	117	5	0	0	60	112	80	8.39	165	16	2230.61	5.41	39	2.96	62	1	1	5	1	0	1	0	0	1	0	0	0	1	58	32	26	44	25	0	0	51	0
1	0	0	0	0	0	F	81	27.89	0	130	5	0	0	85	124	76	9.48	212	2.576	6099.54	4.46	31	3.26	62	0	1	4	3	0	0	0	0	1	3	2	1	0	47	24	27	44	28	0	0
0	0	0	1	1	0	F	65	24.41	0	139	5	0	0	81	128	76	9.93	303	15.634	395.42	21.17	34	3.99	62	1	1	4	1	1	1	0	0	1	1	0	0	1	60	35	28	46	27	0	1	45	0
0	1	1	1	0	0	F	66	25	0	141	7	1	0	66	154	88	10.7	270	0.305	917.55	5.19	15	3.14	62	0	1	7	1	0	1	1	0	0	1	0	0	1	64	35	31	47	35	0	1	53	0
1	0	0	0	1	0	F	65	22.43	0	128	5	0	0	73	114	57	16.79	127	16	190.2	6.7	110	2.23	62	0	1	4	1	0	0	0	0	1	0	0	0	1	46	30	27	48	29	0	0	103	0
0	0	0	1	1	0	M	73	25.71	0	153	7	0	0	94	215	107	9.4	282	16	559.81	7.59	53	3	62	1	1	5	1	0	1	0	0	0	0	0	0	0	73	31	27	48	27	0	0	69	0
0	0	0	1	0	1	M	67	23.31	1	148	0	0	0	38	68	48	10.55	174	0.539	1	5.2	71	2.23	62	1	1	5	4	0	0	0	0	1	0	0	0	0	54	33	30	49	29	0	0	75	0
1	0	0	0	0	0	M	34	23.32	1	157	5	0	0	72	122	89	13.73	251	10.063	113.74	5.78	57	2.47	62	1	1	7	1	0	1	0	0	1	0	0	0	0	54	33	30	49	29	0	0	58	0
1	0	0	0	1	0	F	68	22.52	0	129	5	0	0	73	160	90	4.42	208	0.001	126.02	4.57	58	2.94	62	1	1	4	1	0	0	0	0	1	0	0	0	0	54	33	30	49	29	0	1	69	0
0	0	0	1	1	0	M	67	20.9	1	112	1	0	0	65	178	68	4.8	132	0.001	247.76	3.87	18	3.29	62	1	1	4	1	0	1	1	0	1	0	0	0	0	54	33	30	49	29	0	0	80	0
0	0	0	1	1	0	M	45	21.86	0	128	5	0	0	70	145	90	9.43	293	0.903	741.81	6.2	29	1.24	62	1	1	4	1	0	1	0	0	0	0	0	0	0	65	28	33	49	32	0	0	72	0
1	0	1	0	1	0	F	70	20.4	0	108	5	0	0	70	113	49	5.73	162	7.786	984.3	5.97	15	2.89	62	1	1	5	2	1	0	0	0	1	0	0	0	0	54	33	30	49	29	0	1	54	0
0	0	0	1	0	0	M	61	22.58	1	146	5	0	0	66	125	83	10.43	202	16	152.53	14.64	52	2.87	62	1	1	4	1	0	0	0	0	1	1	0	0	0	63	33	33	50	32	0	0	70	0
0	0	0	1	1	0	M	66	25.56	1	149	7	0	0	71	120	80	5.48	212	0.001	1	5.15	16	2.81	62	1	1	4	1	0	0	0	0	0	0	0	0	1	57	36	36	53	30	0	0	80	0
0	0	0	1	1	0	M	62	23.4	0	128	5	0	0	66	135	84	11.36	262	3.019	2703.24	5.23	39	2.74	62	0	1	4	1	0	0	0	0	1	1	1	0	0	43	34	33	55	32	0	0	76	0
0	0	0	1	1	0	M	72	22.86	1	145	7	0	0	69	161	102	5.78	219	0.714	2074.47	4.88	17	1.92	62	0	1	4	1	0	1	0	0	1	1	1	0	0	47	37	34	58	33	0	0	82	0
0	0	0	0	1	0	M	45	27.18	0	156	5	0	0	91	138	82	14.62	215	16	1638.61	9.81	82	2.99	62	0	1	5	4	1	0	0	0	0	0	0	0	0	31	42	29	59	28	0	0	76	0
0	0	0	1	0	0	F	72	19.52	0	128	7	1	0	83	156	80	10.49	182	2.495	317	4.48	22	3.41	63	1	1	7	1	0	1	0	0	0	0	0	0	1	58	27	25	39	26	0	1	54	0
1	0	0	0	1	0	F	69	20.81	0	87	5	0	0	96	94	62	13.18	204	16	1301.31	7.5	97	3.5	63	1	1	4	1	1	0	0	0	0	0	0	0	1	71	30	24	39	22	0	1	99	0
0	0	0	1	1	0	F	69	22.27	0	138	7	0	0	69	180	110	9.14	233	0.166	391.97	9.21	14	3.72	63	1	1	4	1	0	1	1	0	0	0	0	0	1	62	28	30	40	28	0	0	88	0
1	0	0	0	1	0	M	60	29.03	0	155	7	0	0	66	153	102	14.39	189	16	697.97	16.08	103	5.62	63	0	1	5	1	1	1	0	0	0	0	0	0	0	48	31	26	40	27	0	0	31	1
0	0	0	1	1	0	F	84	27.89	0	114	5	0	0	66	152	66	8.37	171	16	1843.28	10.53	31	3.64	63	0	1	5	1	1	1	0	0	0	0	1	0	0	43	31	26	40	23	0	0	73	1
1	0	0	0	0	0	F	75	24.73	0	108	5	1	0	106	165	76	8.61	282	1.148	758.28	11.59	61	2.89	63	0	1	5	2	1	1	0	0	0	1	0	0	1	75	32	25	41	27	0	1	45	0
0	0	0	1	1	1	F	49	20.7	0	137	5	0	0	86	132	76	7.51	202	8.862	191.13	5.03	51	2.92	63	1	1	5	1	0	0	0	0	0	0	0	0	1	73	26	30	43	29	0	0	54	0
0	0	0	1	0	0	F	60	18.49	0	123	1	0	0	45	140	54	9.9	265	16	181.62	10.49	66	1.33	63	1	1	4	1	1	0	0	0	0	0	0	0	1	65	29	30	45	26	0	1	68	0
0	0	0	1	0	0	F	59	25.44	0	117	7	1	0	62	175	65	9.76	148	2.326	362	6.07	50	2.84	63	1	1	4	1	1	1	0	0	1	0	1	0	1	65	33	26	45	29	0	1	46	0
0	0	0	1	0	1	F	76	19.23	0	80	0	0	0	72	120	80	4.81	504	0.001	1546	4.13	26	2.81	63	0	0	0	1	0	0	0	0	0	1	0	0	0	63	26	27	45	26	0	0	90	0
0	0	0	1	0	0	M	61	24.57	0	151	1	0	0	69	147	86	7.63	156	0.99	20.16	7.83	39	2.02	63	1	1	7	2	0	1	0	0	1	0	0	0	1	64	31	31	46	28	0	1	54	0
1	0	0	0	0	0	M	64	27.99	1	131	7	0	0	92	150	78	8.14	149	11.482	366.77	3.94	42	2.08	63	0	1	4	1	1	1	0	0	1	1	0	0	1	65	35	28	46	28	0	0	75	0
0	0	0	1	0	0	F	63	19.63	1	115	1	0	0	81	122	72	10.44	204	4.057	1734.15	4.88	31	2.46	63	1	1	5	2	1	0	0	0	1	1	0	0	0	60	34	28	46	26	0	0	53	0
0	0	0	1	0	1	M	42	21.97	1	161	5	0	0	86	116	72	14.38	198	5.086	36.58	4.72	26	3.68	63	1	1	5	1	0	0	0	0	1	0	0	0	0	72	29	30	48	30	0	0	80	0
0	0	0	1	1	0	M	47	24	1	173	5	0	0	73	131	72	8.15	147	0.553	286.88	7.19	36	2.28	63	0	1	4	1	1	0	0	0	1	0	0	0	0	54	33	30	49	29	0	0	88	0
1	0	0	0	0	0	M	55	22.84	1	143	3	0	0	73	116	72	7.77	141	16	643.4	8.67	93	2.85	63	0	1	4	1	1	0	0	0	1	0	0	0	0	54	33	30	49	29	0	0	89	0
0	0	0	1	0	0	F	66	24.03	0	134	3	0	0	90	115	66	8.45	246	3.13	917.25	4.59	25	4.53	63	1	1	5	1	0	0	0	0	1	0	0	0	0	54	33	30	49	29	0	1	69	0
0	0	0	1	0	0	F	76	24.39	0	118	5	0	1	86	142	78	10.3	200	0.62	1047.3	7	63	2.06	63	1	1	4	1	0	1	0	0	1	0	0	0	1	55	37	28	49	24	0	1	15	1
0	0	0	1	0	0	F	67	18.31	0	149	5	0	0	62	142	68	13.86	206	3.386	1408.78	6.51	31	2.43	63	1	1	4	1	0	0	0	0	1	0	0	0	0	54	33	30	49	29	0	0	73	0
0	0	0	1	0	0	F	68	19.56	0	122	7	0	0	66	170	80	6.02	133	0.018	1569.05	4.11	182	1.97	63	0	1	4	1	0	1	0	0	1	0	0	0	0	54	33	30	49	29	0	1	97	0
0	0	0	1	0	0	F	68	30.22	0	125	5	0	0	80	130	55	6.94	223	0.21	1668.81	4.71	57	2.91	63	1	1	4	1	0	0	0	0	1	0	0	0	0	54	33	30	49	29	0	0	52	1
0	0	0	1	0	0	M	66	25.35	0	161	3	0	0	76	140	90	9.74	238	0.577	710.58	7.99	31	1.54	63	1	1	4	1	1	0	0	0	1	0	0	1	0	67	33	28	51	31	0	1	68	0
0	0	0	1	1	0	M	60	23.66	1	134	5	0	0	53	107	69	6.86	160	16	2638.76	3.63	33	3.42	63	0	1	5	1	0	0	0	0	0	0	1	1	1	68	28	31	52	30	0	0	78	0
1	0	0	0	1	0	F	51	26.12	0	91	5	0	0	104	124	94	7.82	295	0.056	6663.17	5.55	9	2.91	63	0	1	4	1	0	1	0	0	1	1	1	0	0	19	36	28	54	24	0	0	86	0
0	0	0	1	0	1	F	78	26.71	0	120	0	0	0	55	112	60	14.3	304	16	2878.86	6.7	15	1.22	63	0	1	5	1	0	0	0	0	2	1	1	2	0	49	47	36	56	33	0	0	80	1
0	0	0	1	1	0	F	76	19.22	0	117	5	0	0	68	106	66	7.56	161	12.828	431.17	6.25	11	1.87	64	1	1	5	1	0	1	0	0	0	0	0	0	1	61	25	24	40	24	0	0	71	0
0	0	0	1	0	0	M	67	23.92	0	147	3	0	0	90	106	90	10.98	118	10.467	970.59	8.26	76	2.56	64	1	1	5	1	0	1	1	0	1	0	0	0	0	73	27	29	40	28	0	1	69	0
0	0	0	1	1	0	F	71	21.33	1	124	5	1	0	110	140	80	14.4	202	2.003	6160.79	6.41	52	0.21	64	1	1	7	2	0	1	0	0	0	0	0	0	0	51	24	30	40	24	0	1	47	0
0	0	0	1	0	0	F	35	24.24	0	115	0	0	0	64	102	48	7.09	229	16	2638.76	4.31	19	2.5	64	1	1	4	1	0	0	0	0	0	0	0	0	0	62	30	27	43	28	0	0	101	0
0	0	0	1	0	1	F	45	25.44	0	128	5	0	0	88	122	76	14.55	247	16	80.01	6.22	70	2.1	64	1	1	4	1	0	0	0	0	1	0	0	0	1	57	31	33	44	28	0	0	45	0
0	0	0	1	1	0	M	73	23.03	0	158	1	0	0	88	128	76	12.6	186	16	3588.26	6.7	112	3.23	64	1	1	7	2	1	1	0	0	2	1	2	0	0	48	30	31	44	26	0	1	44	0
0	0	0	1	1	1	F	75	23.22	0	119	5	0	0	78	120	60	8.98	215	16	559.86	6.31	38	2.78	64	1	1	5	1	0	1	0	0	0	0	0	0	0	55	35	27	45	27	0	1	47	0
0	0	0	1	0	0	M	48	25.56	0	156	5	0	0	104	138	82	15.32	222	16	204.11	8.82	85	2.99	64	1	1	5	1	0	0	0	0	0	0	0	0	1	57	25	26	46	25	0	1	69	0
0	0	0	1	0	1	F	73	22.19	0	139	5	0	0	87	154	68	11.33	242	16	421.53	4.83	14	2.48	64	1	1	4	1	0	1	0	0	1	0	0	0	1	62	29	24	46	26	0	0	100	0
0	0	0	1	1	0	M	61	19.49	1	137	0	0	0	60	108	68	5.91	179	0.394	2413.3	4.33	11	2.12	64	1	1	4	1	0	0	0	0	0	0	2	0	1	60	29	30	47	29	0	1	54	0
0	0	0	1	1	0	M	52	24.98	0	161	5	0	0	79	128	76	10.89	255	16	364.1	7.82	68	2.85	64	1	1	4	1	0	0	0	0	1	1	0	0	1	54	28	27	48	25	0	0	44	0
0	0	0	1	1	0	M	53	25.95	0	148	5	0	0	65	119	62	9.9	225	16	371.25	6.01	46	3.66	64	1	1	4	1	0	0	0	0	1	1	0	1	0	46	30	28	48	28	0	1	66	0
0	0	0	1	1	0	M	67	21.59	1	128	1	0	0	82	140	78	9.36	193	12.095	1902.18	6.9	95	1.9	64	1	1	5	2	0	0	0	0	0	0	0	0	0	46	25	26	48	28	0	0	72	0
0	0	0	1	0	0	M	63	21	1	146	3	0	0	56	154	82	12.81	175	0.268	42.57	7.15	35	3.71	64	1	1	4	1	1	1	0	0	1	0	0	0	0	54	33	30	49	29	0	1	74	0
1	0	0	0	0	0	F	62	22.6	0	118	5	0	0	90	102	70	17.86	261	15.672	275.77	5.01	47	3.18	64	1	1	5	1	0	0	0	0	1	0	0	0	0	54	33	30	49	29	0	1	85	0
1	0	0	0	0	0	F	69	15.81	0	136	3	0	0	61	108	48	17.79	797	0.295	942.16	3.91	15	2.05	64	0	1	4	1	0	1	0	0	1	0	0	0	0	54	33	30	49	29	0	1	72	0
0	0	0	1	0	0	F	79	13.15	0	139	0	1	0	40	134	81	5.87	199	15.601	1091.26	4.52	50	2.62	64	1	1	5	4	0	0	0	0	1	0	0	0	0	54	33	30	49	29	0	1	65	0
0	0	0	1	0	0	M	54	27.39	1	119	5	0	0	72	113	89	12.17	259	4.512	1409.4	4.74	67	2.68	64	1	1	4	1	0	0	0	0	1	0	0	0	0	54	33	30	49	29	0	0	75	0
0	0	0	1	0	0	M	56	23.84	1	133	5	0	0	60	130	90	9.37	333	0.001	2638.76	6.7	24	1.17	64	1	1	4	1	1	1	0	0	1	0	0	0	0	68	29	28	49	30	0	0	79	0
0	0	0	1	1	0	F	69	22.03	0	125	3	0	0	54	90	56	10.92	216	0.18	368	5.1	28	2.52	64	1	1	7	1	0	0	0	0	1	1	1	0	0	47	33	30	51	30	0	0	71	0
1	0	0	0	0	0	M	55	24.22	1	158	5	0	0	73	120	70	12.49	195	16	1678.75	7.09	37	2.36	64	1	1	4	1	0	1	0	0	2	0	1	0	0	50	40	33	51	31	0	0	61	0
1	0	0	0	0	0	F	61	24.44	0	140	7	0	0	85	152	90	8.33	256	0.135	459.47	15.83	45	3.64	64	1	1	4	2	1	1	0	0	1	0	0	0	0	50	32	28	53	24	0	1	74	0
0	0	0	1	1	0	F	65	20.45	0	134	5	0	0	97	120	84	13.75	219	16	4211.39	5.98	70	3.11	64	1	1	4	1	1	0	0	0	1	0	1	0	0	40	29	26	54	24	0	1	29	1
1	0	0	0	0	0	M	71	20.76	1	137	0	0	0	76	128	76	8.83	168	2.92	2382.16	6.7	35	2.98	64	1	1	5	1	0	0	0	0	1	1	1	0	0	37	36	37	56	33	0	1	50	0
0	0	0	1	0	1	M	61	21.46	1	152	5	0	0	84	134	86	5.36	205	11.683	10304.7	6.05	340	2.71	64	1	0	4	1	0	0	0	0	2	1	2	1	0	36	48	50	61	47	0	0	21	1
0	0	0	1	1	1	F	83	21.78	0	119	5	0	0	75	96	63	10.05	185	15.721	2326.75	6.78	68	2.99	65	0	1	4	1	0	0	0	0	0	1	0	0	0	52	22	24	40	21	0	0	58	1
0	0	0	0	0	0	M	54	25.97	1	130	7	0	0	68	135	74	9.48	212	0.033	1	5.06	116	2.41	65	1	0	4	1	0	1	0	0	1	0	2	0	1	60	29	36	41	30	0	1	47	0
0	0	0	1	0	0	F	75	26.4	0	145	7	0	0	76	186	80	7.44	223	8.503	594.37	10.83	32	2.73	65	1	1	5	1	1	1	0	0	0	1	0	0	1	63	27	26	41	26	0	1	68	0
0	0	0	1	0	0	M	49	19.53	0	126	0	0	0	57	110	78	13.73	186	16	1129	12.95	32	1.93	65	0	1	4	1	1	0	0	0	0	0	0	1	1	71	28	28	41	22	0	0	80	0
0	0	0	0	0	0	M	62	24.8	1	155	5	0	0	75	146	88	11.35	290	13.958	2638.76	5.77	38	3.07	65	1	1	5	1	0	0	0	0	0	0	0	0	0	76	33	29	45	30	0	0	77	0
0	0	0	1	0	0	M	58	23.44	1	128	1	0	0	60	120	60	7.22	252	3.568	2843.84	5.7	38	2.22	65	0	1	7	1	1	0	0	0	0	0	0	0	1	65	28	32	45	3	0	1	81	0
1	0	0	0	0	0	M	69	20.94	1	117	1	0	0	88	106	68	11.95	281	16	327.9	5.66	74	2.6	65	1	1	5	1	0	0	0	0	1	0	0	0	1	64	33	29	47	27	0	0	67	1
1	0	0	0	0	1	F	69	30.48	0	143	5	0	0	90	190	110	7.53	196	0.088	1825.5	6.16	25	2.22	65	1	1	5	2	1	1	0	0	1	0	0	0	1	60	35	33	47	35	0	1	47	0
0	0	0	1	0	0	M	51	26.13	1	136	5	0	0	76	154	96	5.89	218	3.748	453.53	9.84	40	2.4	65	0	1	5	1	1	1	0	0	0	0	0	0	1	66	34	32	48	31	0	1	84	0
1	0	0	0	0	0	M	56	26.22	1	149	5	0	0	85	145	91	11.96	163	16	960.46	6.7	45	3.5	65	0	1	4	1	0	0	0	0	1	0	0	0	0	54	33	30	49	29	0	0	76	0
0	0	0	1	0	0	F	67	22.06	0	113	5	0	0	94	149	81	10.99	215	8.714	1786.6	6.31	21	2.18	65	1	1	5	1	0	1	0	0	1	0	0	0	0	54	33	30	49	29	0	0	65	0
0	0	0	1	1	0	M	64	23.26	0	109	5	0	0	76	132	86	6.08	164	0.11	2394.61	3.37	40	2.34	65	0	1	4	2	1	1	1	0	0	0	0	0	1	26	24	24	49	26	0	0
0	0	0	1	1	0	F	63	20.03	0	132	5	0	0	97	118	74	13.91	267	11.882	3258.77	5.69	115	2.68	65	1	1	5	2	0	0	0	0	1	0	0	0	0	41	32	34	49	29	0	0	46	0
0	0	0	1	0	0	F	70	24.17	0	99	7	0	0	74	199	91	12.94	277	0.64	3560	6.9	22	2.72	65	0	1	4	3	0	1	1	0	0	2	1	1	0	44	36	36	49	26	0	0	11	1
0	0	0	0	0	0	M	66	21.61	1	124	1	0	0	68	110	64	6.3	205	16	5714.51	6.21	45	1.67	65	1	1	4	1	0	0	0	0	1	0	0	0	0	54	33	30	49	29	0	0	103	0
1	0	0	0	1	1	M	58	22.58	1	135	1	0	0	66	128	76	14.22	172	10.803	2638.76	5.63	62	2.09	65	1	1	5	1	0	0	0	0	0	0	1	0	1	56	32	28	53	29	0	0	46	0
0	0	0	1	0	1	M	40	25.95	1	151	5	0	0	75	120	71	11.69	192	14.711	178.18	7.1	128	2.29	65	1	1	5	1	0	0	0	0	1	0	0	0	1	64	37	27	54	32	0	1	47	0
0	0	0	1	1	0	F	70	21.48	1	106	5	0	0	68	174	82	4.99	249	16	1781.3	11.15	66	3.11	65	1	1	4	1	1	1	0	0	1	2	1	0	1	67	37	30	55	27	0	0	95	0
0	0	0	1	1	0	M	70	19.49	1	119	5	0	0	103	120	70	11.18	422	16	3872.74	8.36	110	2.44	65	0	1	5	1	0	1	0	0	1	1	2	0	0	46	37	33	62	33	0	0	73	0
1	0	0	0	1	0	F	80	14.79	0	106	1	0	0	70	111	73	5	124	12.724	6757.56	8.24	21	1.66	66	1	1	4	1	1	0	0	0	1	0	0	0	0	40	27	22	38	22	0	1	60	0
1	0	0	0	0	0	F	74	20.83	0	108	1	0	0	72	134	68	4.98	92	0.886	3600.12	4.71	80	2.86	66	1	1	5	1	0	1	0	0	1	1	1	0	0	50	37	27	41	26	0	0	57	0
0	0	0	1	1	0	F	79	21.09	1	107	5	0	0	100	127	78	11.08	222	13.173	1258.48	10.34	85	2.82	66	1	1	4	3	0	1	0	0	0	1	0	0	0	53	24	29	42	23	0	1	68	0
0	0	0	1	0	1	M	59	23.63	1	163	3	1	0	89	118	70	7.92	189	4.196	177.23	4.96	30	4.25	66	0	1	4	1	0	0	0	0	1	1	1	1	1	61	29	29	44	25	0	1	103	0
0	0	0	1	1	0	M	63	22.76	1	146	5	0	0	76	122	92	9.4	243	16	1122.12	4.49	29	2.16	66	1	1	4	2	0	0	0	0	1	0	0	0	1	62	29	26	45	28	0	0	98	0
1	0	0	0	0	0	M	69	26.73	1	129	7	0	0	59	124	82	10.47	179	0.47	2638.76	4.99	45	3.4	66	1	1	4	2	0	1	0	0	0	0	0	1	1	65	33	30	45	29	0	1	68	0
0	0	0	1	0	0	M	46	27.01	1	140	5	0	0	94	136	90	8.7	229	4.524	2788.31	6.51	40	2.85	66	1	1	5	1	0	0	0	0	1	0	1	0	0	48	28	31	45	31	0	1	65	0
0	0	0	1	1	0	M	84	21.51	0	139	5	0	0	76	160	80	8.37	148	2.658	3291.66	16.46	59	2.43	66	1	1	4	2	1	1	0	0	0	0	0	0	0	45	27	32	45	24	0	0	47	0
1	0	0	0	0	0	F	49	17.26	0	82	3	0	0	63	95	60	4.15	226	1.237	613.82	3.95	10	2.34	66	0	1	4	1	0	0	0	0	1	0	1	0	1	57	34	28	46	30	0	0	51	0
0	0	0	1	0	0	F	61	23.42	0	127	0	0	0	90	180	100	10.44	214	12.303	314.89	5.41	38	2.29	66	0	1	5	1	0	1	1	0	1	0	0	1	1	71	36	30	47	33	0	0	74	0
0	0	0	1	0	0	F	80	24.97	0	115	3	0	0	52	108	60	8.79	267	16	592.15	5.22	33	3.26	66	0	1	7	2	0	1	0	0	0	1	1	1	0	48	31	24	48	27	0	0	78	0
0	0	0	1	0	0	F	75	19.88	0	96	3	0	0	75	90	59	6.68	230	9.01	5476.52	5.38	59	1.65	66	1	1	5	1	1	0	0	0	2	1	2	0	0	51	35	28	48	31	0	1	63	0
0	0	0	1	1	1	M	47	23.12	1	137	5	0	0	80	146	86	11.55	79.9	5.247	51.09	4.71	28	3.09	66	1	1	5	1	0	1	0	0	1	0	0	0	1	61	31	28	49	27	0	0	47	0
1	0	0	0	0	0	F	72	25.39	0	122	5	0	0	62	149	55	6.08	204	5.928	601.37	6.17	30	2.85	66	0	1	2	2	0	1	1	0	0	0	0	0	1	54	33	30	49	29	0	0	72	0
0	0	0	1	0	1	F	74	20.96	0	91	0	0	0	99	103	55	4.6	52	4.67	2036.55	5.51	30	1.09	66	0	1	0	4	0	0	0	0	1	0	0	0	0	54	33	30	49	29	0	0	4	1
0	0	0	1	0	0	M	73	28.04	1	123	5	0	0	90	120	80	8.7	193	7.1	2981.26	4.7	39	2.25	66	1	1	4	1	0	0	0	0	1	0	0	0	0	54	33	30	49	29	0	0	83	0
0	0	0	1	1	0	M	79	21.48	1	124	5	0	0	80	128	70	15.88	169	16	6250.13	6.7	62	2.21	66	1	1	4	1	0	0	0	0	1	0	0	0	0	54	33	30	49	29	0	0	70	0
0	0	0	1	1	0	F	61	25.63	1	141	7	0	0	110	198	120	16	225	16	255.22	11.96	62	2.89	66	1	1	4	1	1	1	0	0	2	0	1	0	1	56	34	30	50	24	0	0	100	0
0	0	0	1	0	0	F	85	21.88	0	114	5	0	0	72	136	72	10.85	178	1.416	1690.58	6.35	17	2.13	66	0	1	5	2	0	0	0	0	1	0	1	0	0	55	34	32	52	29	0	0	39	1
1	0	0	0	0	0	M	49	28.93	0	145	5	0	0	55	150	84	14.47	354	0.08	1557.51	5.44	46	2.25	66	1	1	5	1	1	0	0	0	0	0	0	0	0	71	33	31	53	30	0	0	57	0
0	0	0	1	0	0	M	54	26.57	0	162	5	1	0	64	144	90	8.97	153	0.001	416.38	3.41	111	6.02	66	0	1	4	1	0	1	0	0	0	0	0	0	1	50	36	30	63	32	0	1	47	1
0	0	0	1	0	1	M	54	18.36	1	120	0	1	0	74	86	58	13.61	302	6.417	265.52	6.49	65	1.51	67	1	1	7	4	0	0	0	1	2	0	0	0	0	51	31	30	44	25	0	1	61	1
1	0	0	0	1	1	M	52	27.04	1	148	5	0	0	72	107	66	12.75	194	16	230.55	10.41	75	2.27	67	1	1	5	1	1	1	0	0	1	0	0	1	1	58	35	30	45	29	0	0	69	0
0	0	0	1	0	0	F	57	21.09	0	117	5	0	0	67	90	61	6.87	177	4.625	410.2	7.16	81	3.93	67	1	1	5	2	0	0	0	0	1	1	1	0	0	53	29	33	45	31	0	1	65	0
0	0	0	1	0	0	F	55	18.86	0	124	5	0	0	68	138	78	9.69	322	0.064	2211.46	5.57	27	3.26	67	1	1	4	1	0	1	0	0	0	0	0	0	1	72	26	27	45	25	0	0	35	1
0	1	0	1	0	1	M	71	26.17	0	78	3	0	0	94	140	61	11.34	205	5.427	7140.58	6.7	35	1.97	67	0	1	7	4	0	1	1	0	0	1	1	1	0	58	22	24	45	25	0	0	1	1
0	1	0	1	1	0	F	68	19.72	0	134	3	0	0	108	92	68	14.48	208	16	7825.82	6.61	71	2.82	67	0	1	4	2	0	0	0	0	2	0	2	0	0	37	31	26	46	25	0	0	77	0
0	0	0	1	1	0	M	40	27.28	0	67	5	0	0	90	128	76	7.76	302	16	243.16	7.5	53	1.77	67	1	1	5	1	0	1	0	0	0	1	0	0	0	53	32	27	47	26	0	0	44	0
0	0	0	1	0	0	M	51	19.14	1	127	0	0	0	55	107	57	9.91	201	16	1216.56	5.42	15	2.45	67	1	1	4	1	0	0	0	0	0	0	0	0	0	58	26	27	47	28	0	0	75	0
0	0	0	1	0	0	M	57	25.64	1	134	7	0	0	90	133	95	8.48	231	16	249.41	7.15	61	2.66	67	0	1	4	2	1	1	1	0	1	1	0	0	1	56	34	28	48	30	0	0	78	0
0	0	0	1	0	0	M	55	20.69	1	138	3	0	0	72	110	70	5.2	180	3.34	445.57	4.81	10	2.71	67	1	1	4	1	0	0	0	0	0	0	1	0	0	62	31	32	48	30	0	0	74	0
0	0	0	1	1	0	M	62	23.18	1	131	5	0	0	60	99	65	9.75	257	6.235	1111.64	7.44	80	1.15	67	1	1	4	2	0	1	0	0	1	0	0	0	0	57	33	31	48	28	0	1	51	0
0	0	0	1	0	0	F	71	24.41	0	131	5	0	0	72	119	68	11.47	232	16	2529.4	7.27	39	2.5	67	0	1	4	1	1	1	0	0	1	0	0	0	0	33	34	28	48	25	0	1	62	0
0	0	0	1	0	1	F	77	24.84	0	108	3	0	0	92	109	72	11.77	188	7.743	2164.44	7.17	43	2.14	67	0	1	4	2	0	0	0	0	1	0	0	0	0	54	33	30	49	29	0	0	69	0
0	0	0	1	0	0	F	61	25.39	0	121	5	0	0	91	100	70	14.18	198	16	4531.99	9.5	87	2.53	67	0	1	4	1	1	1	0	0	0	0	0	0	0	54	33	30	49	29	0	1	77	0
1	0	0	0	1	0	M	63	24.61	1	150	0	0	0	87	118	73	4.65	114	16	2135.56	5.98	46	3.51	67	1	1	5	2	0	0	0	0	1	1	0	0	0	49	31	30	50	27	0	0	49	0
0	0	0	1	1	0	M	41	25.82	1	161	5	0	0	86	132	81	20.54	284	16	389.28	5.48	121	2.62	67	0	1	4	2	0	0	0	0	0	0	0	0	1	52	35	33	53	31	0	0	95	0
0	0	0	1	1	0	F	74	22.22	0	109	5	1	0	71	150	110	11.12	246	7.62	761.19	5.73	61	3.59	67	1	1	5	1	0	0	0	0	0	1	1	0	0	38	37	25	53	26	0	1	69	0
1	0	0	0	0	0	M	49	31.57	0	149	5	0	0	90	118	70	15.8	147	15.42	1295.06	5.49	38	2.87	67	1	1	4	1	0	0	0	0	0	0	0	0	1	60	34	29	53	30	0	0	102	0
0	0	0	1	0	0	M	60	23.67	0	121	1	0	0	48	105	71	5.92	160	1.148	1531.2	6.7	77	2.52	67	1	1	5	2	0	1	0	0	1	0	3	0	0	44	42	42	57	40	0	1	58	0
0	0	0	1	0	0	F	84	20.55	0	110	5	0	0	93	107	67	8.97	265	3.091	202.09	4.4	14	2.14	68	0	1	4	1	1	0	0	0	0	1	0	0	0	80	29	24	36	21	0	0	46	0
1	0	0	0	1	0	M	66	23.88	0	125	5	0	0	84	146	82	13.36	153	16	329.65	9.79	45	3.18	68	1	1	5	1	1	1	0	0	0	0	0	0	0	74	34	34	39	33	0	1	71	0
0	0	0	1	0	0	M	53	24.61	1	138	1	1	0	88	122	76	9.58	277	0.526	1069.91	5.48	27	2.55	68	0	1	5	2	0	0	0	0	1	0	0	0	1	65	26	30	42	25	0	1	54	0
0	0	0	1	0	1	M	38	26.64	1	151	5	0	0	88	124	64	13.26	160	16	363.13	5.06	57	2.04	68	1	1	4	1	0	0	0	0	0	0	0	1	1	68	25	28	43	32	0	0	98	0
0	0	0	1	0	0	F	66	25.47	0	107	7	0	0	78	128	84	8.47	261	0.598	2385.55	5.28	75	2.33	68	1	1	4	1	0	0	0	0	1	1	1	0	1	70	28	30	43	26	0	0	82	0
0	0	0	1	1	0	M	72	17.15	1	105	3	0	0	68	160	78	4.29	136	0.964	425.1	28.61	14	1.86	68	1	1	5	1	0	1	0	0	1	0	1	0	0	47	28	29	45	30	0	1	58	0
0	0	0	1	0	0	F	80	19.15	1	104	1	0	0	66	106	68	5.8	191	7.834	1745.36	4.85	20	2.85	68	0	1	4	1	0	1	0	0	2	1	0	0	0	61	35	24	45	24	0	0	83	0
0	0	0	1	0	0	F	80	28.54	0	121	5	0	0	90	137	81	10.77	180	7.426	761.01	7.4	73	2.94	68	1	1	4	2	0	1	0	0	0	1	1	0	0	38	28	24	46	22	0	0	51	0
0	0	0	1	0	0	M	53	23.72	1	152	5	0	0	77	104	75	11.29	218	0.864	277.07	5.14	23	2.52	68	0	1	5	1	0	0	0	0	0	0	0	0	1	74	28	29	47	26	0	0	54	0
0	0	0	1	0	0	F	84	23.46	0	107	1	0	0	62	158	72	13.42	242	14.598	6002.81	4.31	60	2.64	68	0	1	5	2	0	0	0	0	0	0	0	0	1	53	30	32	48	29	0	0	68	0
0	0	0	1	0	0	F	71	19.53	0	97	0	0	0	64	80	53	13.87	157	16	2010.39	6.8	67	3.69	68	0	1	4	4	0	0	0	0	1	0	0	0	0	54	33	30	49	29	0	0	1	1
0	0	0	1	0	0	F	81	22.89	0	130	1	0	0	50	120	66	10.9	199	16	2370.35	10.85	21	2.74	68	0	1	7	4	1	1	0	0	1	0	0	0	0	54	33	30	49	29	0	0	77	0
0	0	0	1	0	0	F	70	19.72	1	97	5	0	0	85	113	71	8.1	237	2.784	15000	11.46	24	2.25	68	0	1	4	4	1	1	0	0	1	0	1	0	0	39	36	29	49	27	0	1	62	0
0	0	0	1	0	0	M	60	24.34	1	140	1	0	0	54	126	70	7.85	183	4.567	878.76	6.85	26	2.55	68	1	1	5	1	1	1	0	0	1	0	1	1	1	66	37	33	50	31	0	0	52	0
0	0	0	1	0	1	M	86	25.39	0	124	1	0	0	57	133	64	10.27	169	15.356	455.27	5.49	25	1.7	68	0	1	4	1	0	0	0	0	1	0	1	0	1	50	38	34	51	31	0	0	74	0
0	0	0	1	0	0	F	44	22.64	0	136	5	0	0	88	157	100	10.1	161	6.47	7346.1	6.7	84	2.43	68	1	1	5	1	0	1	0	0	2	1	2	1	0	29	37	37	51	28	0	1	44	0
0	0	0	1	0	0	M	66	21.48	1	108	1	0	0	65	128	76	11.25	185	16	1508.37	5.89	45	1.36	68	1	1	4	1	0	0	0	0	1	0	2	1	0	51	37	37	54	31	0	0	44	0
0	0	0	1	0	1	M	45	25.85	1	160	7	0	0	72	140	100	11.21	267	11.617	169.31	5.89	105	3.03	69	1	1	5	1	0	1	0	0	0	0	0	0	1	76	29	29	41	27	0	0	71	0
1	1	0	0	0	1	F	61	24.52	1	122	3	0	0	70	109	99	12.32	237	2.478	136.32	7.58	35	2.54	69	1	1	7	1	0	1	0	0	2	0	1	0	0	51	35	26	42	25	0	0	57	0
1	0	0	0	0	0	F	80	18.73	0	91	5	0	0	85	130	80	11.05	149	16	1087.25	12.11	68	1.52	69	1	1	4	1	1	0	0	0	3	0	2	0	1	50	34	36	42	33	0	1	97	0
0	0	0	1	1	0	M	78	23.39	1	133	5	0	0	78	115	75	6.54	161	9.66	2638.76	4.7	22	2.04	69	1	1	7	1	0	1	1	0	0	0	0	1	1	61	30	30	42	33	0	1	83	0
0	0	0	1	0	0	F	62	25.47	1	119	7	0	0	72	140	90	9.49	316	0.001	1554.47	7.29	14	2.12	69	1	1	4	1	1	1	0	0	1	0	0	1	0	71	27	32	43	29	0	0	82	0
0	0	0	1	0	0	F	48	21.09	0	127	4	0	0	69	154	79	10.33	184	10.874	486.08	7.91	28	2.46	69	1	1	5	1	0	1	0	0	0	0	1	0	0	55	26	30	44	28	0	0	46	0
0	0	0	1	1	0	M	61	17.63	1	118	5	0	0	82	148	74	6.99	298	1.536	597.68	5.4	25	1.54	69	1	1	4	1	0	0	0	0	0	0	1	0	1	67	31	30	44	27	0	0	63	0
0	0	0	1	1	0	M	61	21.26	1	111	3	0	0	80	102	62	3.66	124	11.885	5415.05	4.95	88	2.3	69	1	1	4	2	0	1	0	0	1	0	1	0	1	53	31	35	44	34	0	0	65	0
0	0	0	1	1	0	M	66	24.86	1	128	0	0	0	85	138	69	7.32	124	2.325	342.48	5.26	30	2.6	69	1	1	5	1	0	0	0	0	1	1	1	0	0	47	28	29	46	31	0	0	49	0
0	0	0	0	1	0	F	66	27.06	0	127	5	0	0	96	168	100	18.73	146	13.88	1705.32	7.6	69	3.31	69	0	1	2	2	0	1	0	0	0	0	1	0	0	42	30	29	46	27	0	0	84	0
1	0	0	0	0	0	M	53	25.43	1	154	1	0	0	94	146	94	8.78	147	16	2541.88	7.11	149	1.85	69	1	1	5	1	1	1	0	0	1	0	1	0	0	65	30	33	46	31	0	1	9	1
1	0	0	0	1	0	F	76	20.03	0	108	3	1	0	88	140	81	9.77	176	5.46	4024.3	14.41	26	2.3	69	1	1	4	1	1	1	0	0	0	0	0	0	1	56	33	31	46	31	0	1	82	0
0	0	0	1	0	1	M	49	21.77	1	124	7	0	0	90	174	123	8.77	211	8.468	681.84	5.19	45	2.86	69	1	1	4	1	0	1	0	0	1	0	0	0	1	60	31	29	48	29	0	1	65	0
0	1	0	0	1	0	F	62	22.43	0	155	5	0	0	82	136	76	17.43	204	12.074	251.63	9.57	11	3	69	0	1	4	2	1	1	0	0	1	0	0	0	0	54	33	30	49	29	0	0	84	0
0	0	0	1	0	0	M	60	26.22	1	135	5	0	0	82	124	82	7.58	202	0.001	441.97	5.61	70	1.68	69	1	1	4	1	0	0	0	0	1	0	0	0	0	54	33	30	49	29	0	1	91	0
0	0	0	1	0	0	M	61	29.39	1	147	7	0	0	65	154	82	10.17	227	9.654	455.65	17.27	51	2.52	69	0	1	5	1	1	1	0	0	1	0	0	0	0	54	33	30	49	29	0	0	66	0
1	0	0	0	1	1	M	63	23.81	1	134	7	0	0	81	128	76	11.46	290	16	1091.42	4.97	34	5.2	69	1	1	5	1	1	0	0	0	1	0	1	0	1	77	36	32	49	29	0	1	46	0
0	0	0	1	1	0	M	63	22.68	1	144	5	0	0	86	116	76	22.69	149	16	1999.04	5.81	48	1.7	69	1	1	5	1	0	0	0	0	1	0	0	0	0	54	33	30	49	29	0	1	74	0
0	0	0	1	0	0	M	47	31.53	1	148	5	0	0	82	120	80	6.08	171	0.198	345.76	5.7	41	1.73	69	1	1	4	1	0	0	0	0	0	0	0	0	1	69	33	32	50	28	0	0	97	0
1	1	1	0	0	0	M	35	26.23	1	156	5	0	0	80	125	80	9.02	258	0.442	470.61	5.41	58	3.86	69	1	1	4	1	0	1	0	0	0	0	0	0	1	63	35	35	51	35	0	1	64	0
0	0	0	1	0	0	M	61	24.61	1	140	5	0	0	59	138	79	10.07	229	2.393	2424.11	6.55	34	2.54	69	1	1	5	2	0	0	0	0	1	0	0	0	0	48	32	35	51	29	0	1	57	0
0	0	0	1	1	0	M	83	27.04	1	146	1	1	0	66	128	76	11.11	187	16	2983.29	7.83	45	2.14	69	1	1	4	2	1	0	0	0	1	1	0	0	1	55	38	33	51	30	0	1	46	0
0	0	0	1	0	0	M	45	24.51	1	139	3	0	0	68	105	71	15.19	203	0.746	146	6.5	46	3.03	69	0	1	4	1	0	1	1	0	1	0	1	1	0	57	33	35	52	35	0	1	76	0
1	0	0	0	0	0	M	50	23.44	1	124	7	0	0	95	172	123	11.68	349	0.01	280.07	15.61	32	3.51	69	1	1	4	1	1	1	0	0	1	1	0	0	1	55	32	20	52	23	0	0	102	0
1	0	0	0	1	0	M	38	39.79	1	152	5	0	0	61	96	62	10.62	251	3.252	671.31	6.06	34	2.16	69	1	1	4	2	0	0	0	0	1	0	0	0	0	48	35	33	52	32	0	0	53	0
0	0	0	1	1	0	M	70	28.51	0	139	7	0	0	80	156	93	5.44	113	3.904	2796.53	6.31	21	2.02	69	1	1	4	1	1	1	0	0	0	1	0	0	0	57	27	33	54	31	0	0	85	0
0	0	0	1	0	0	M	52	25.16	1	120	5	0	0	69	93	50	8.36	268	1.664	4208.12	6.49	33	1.24	69	1	1	5	1	1	0	0	0	1	0	1	0	0	44	43	35	57	28	0	0	44	0
0	0	0	1	0	0	M	65	17.92	1	132	3	0	0	60	110	60	4.99	259	0.001	241.76	5.8	38	2.29	70	1	1	4	1	0	0	0	0	0	0	1	0	1	66	24	27	38	27	0	0	66	0
0	0	0	1	1	0	F	71	20.83	0	111	5	0	1	66	120	84	5.07	279	0.001	2994.91	3.9	45	1.6	70	1	1	4	1	0	0	0	0	1	1	0	1	0	74	43	22	40	24	0	0	70	0
0	0	0	1	0	0	M	53	21.22	1	152	6	0	0	119	128	76	10.29	210	16	513.74	5.55	58	3.12	70	1	1	5	1	0	1	0	0	1	0	0	0	0	58	29	30	43	27	0	1	54	0
0	0	0	1	0	0	M	70	18.37	1	99	7	0	0	100	155	78	10.42	304	5.206	3416.18	9.39	16	2.52	70	1	1	5	2	1	1	0	0	0	1	1	1	1	65	29	34	43	33	0	1	50	0
0	0	0	1	0	0	M	58	34.45	0	156	5	0	0	88	144	94	7.26	166	0.83	480.48	5.72	34	2.26	70	0	1	5	1	0	1	0	0	0	0	0	0	0	69	37	28	44	28	0	1	81	0
0	0	0	1	0	0	M	50	23.41	1	151	5	0	0	58	128	80	8.35	336	2.27	1562.35	4.81	52	2.69	70	1	1	4	1	1	1	0	0	1	0	1	0	0	66	31	27	44	31	0	0	59	0
0	0	0	1	0	0	M	73	21.86	1	95	5	0	0	77	120	74	4.3	198	0.702	2014.47	4.36	75	1.78	70	1	1	4	1	0	0	0	0	1	0	1	1	0	58	28	25	44	27	0	1	81	0
0	0	0	1	0	0	F	66	28.3	0	128	7	0	0	76	155	80	6.68	184	2.97	1654.98	5.68	55	4.36	70	0	1	4	1	0	1	0	0	1	1	0	1	1	62	36	34	46	35	0	0	51	0
0	0	0	1	1	0	M	57	25.95	1	146	1	0	0	58	120	78	9.1	317	0.194	337.23	4.51	184	1.92	70	1	1	4	1	0	1	0	0	0	0	0	0	1	64	26	25	47	33	0	0	79	0
1	0	0	0	0	0	F	73	24.14	0	115	5	0	0	65	150	88	10.14	265	0.398	743.04	6.87	10	2.94	70	1	1	5	1	1	0	0	0	1	0	0	0	0	42	26	29	47	24	0	1	49	0
0	0	0	1	0	0	M	65	24.17	1	117	5	0	0	80	154	96	8.14	271	0.045	170	6.59	36	1.17	70	1	1	4	1	0	0	0	0	0	0	1	0	1	62	25	28	48	25	0	1	103	0
0	0	0	1	0	1	M	44	27.45	1	157	5	0	0	82	113	71	12.77	205	16	216.86	9.36	97	5.43	70	1	1	5	4	1	1	0	0	0	0	0	0	1	65	37	30	48	30	0	1	64	0
0	0	0	1	0	1	M	72	26.42	1	125	7	0	0	88	142	86	16	195	16	88.93	5.23	57	1.45	70	1	1	4	1	0	1	0	1	1	0	0	0	0	54	33	30	49	29	0	1	15	1
0	0	0	1	0	0	M	52	25.95	1	152	5	0	0	70	110	70	6.67	163	0.443	127.25	5.18	26	2.27	70	1	1	4	1	0	0	0	0	0	0	0	1	0	60	31	33	50	33	0	1	79	0
0	0	0	1	1	0	F	73	23.11	0	114	5	0	0	82	130	81	10.09	245	0.085	6179.82	5.15	13	1.58	70	1	1	4	2	0	1	0	0	2	0	1	1	0	43	38	31	50	30	0	0	58	0
0	0	0	1	1	0	M	64	22.58	0	127	5	0	0	87	143	86	5.37	164	5.551	1577.31	13.41	34	3.06	70	0	1	4	1	1	1	0	0	1	1	1	1	1	54	31	29	51	30	0	1	77	0
1	0	0	0	0	0	M	53	24.22	1	143	5	0	0	76	168	105	9.78	250	16	1858.74	9.99	26	4.14	70	1	1	5	1	0	1	0	0	0	0	0	0	1	56	27	25	51	23	0	0	70	0
1	0	0	0	0	0	M	45	24.8	0	156	5	0	0	72	114	82	14.62	255	16	221.86	18.47	45	4.09	70	1	1	4	1	1	0	1	0	0	0	0	0	0	60	40	27	52	27	0	1	70	0
0	0	0	1	0	0	M	61	26.79	0	141	5	1	0	94	128	84	6.31	154	3.349	1180	7.77	16	1.9	70	0	1	4	1	1	1	0	0	2	1	1	0	0	31	35	34	52	34	0	1	51	1
0	0	0	1	1	0	M	49	27.94	1	136	1	0	0	66	112	80	6.96	181	0.001	23.56	4.81	38	2.09	70	1	1	7	4	0	1	0	1	0	0	0	0	0	25	25	33	55	33	0	0	3	1
0	0	0	1	0	1	M	60	23.03	1	122	5	0	0	76	110	75	7.22	144	8.669	3083.09	6.21	83	2.16	70	0	1	4	2	1	0	0	0	2	1	1	1	0	41	37	32	56	32	0	1	77	0
0	0	0	1	1	0	M	60	26.22	1	151	5	0	0	84	98	78	6.04	129	9.427	3339.77	5.23	65	3.73	70	0	1	4	2	0	0	0	0	1	1	1	0	0	35	32	27	56	25	0	0	53	1
0	0	0	1	0	0	F	76	22.99	1	109	3	0	0	92	98	48	5.57	157	2.271	8568.77	6.14	16	6.06	70	0	1	4	1	0	1	0	0	3	1	1	0	0	43	39	29	57	27	0	1	81	0
0	0	0	1	1	0	M	62	29.07	1	143	5	0	0	53	132	78	5.03	140	1.335	1917.23	4.67	39	1.37	70	1	1	4	2	0	1	0	0	0	1	0	0	0	32	45	36	70	36	0	0	70	0
0	0	0	1	0	0	M	69	23.55	1	133	5	0	0	68	125	71	8.31	193	2.358	248.6	4.48	11	2.84	71	1	1	4	1	0	0	0	0	0	0	1	0	1	71	32	30	40	29	0	0	47	0
0	0	0	1	0	0	F	66	19.22	1	132	3	0	0	90	128	76	9.23	262	15.207	3009.33	4.84	24	2.17	71	1	1	5	2	0	0	0	0	1	1	0	0	0	52	23	24	41	24	0	0	55	0
0	0	0	1	0	1	M	52	22.06	1	150	5	0	0	70	102	58	18.44	161	0.111	58.15	6.7	110	2.61	71	1	1	4	1	1	0	0	1	0	0	0	0	1	66	29	29	43	29	0	0	88	0
1	0	0	0	0	0	M	33	28.76	0	148	5	0	0	51	100	52	8.73	323	0.566	1327.46	5.14	56	2.43	71	1	1	4	1	0	0	0	0	0	0	1	0	0	73	29	29	44	27	0	0	66	0
1	0	0	0	0	1	M	45	25.95	1	148	5	0	0	86	154	97	7.91	205	12.4	2638.76	6.7	45	2.71	71	1	1	5	1	1	1	0	0	0	0	0	0	1	59	31	34	44	33	0	0	45	0
0	0	0	1	0	0	M	61	19.92	1	162	5	0	0	89	138	90	11.91	218	16	2539.32	4.85	32	3.24	71	1	1	4	1	0	0	0	0	0	0	1	0	1	67	33	28	45	28	0	0	77	0
0	0	0	1	1	1	M	63	25.71	1	149	5	0	0	86	130	86	11.8	308	0.891	708.87	5.04	29	3.64	71	1	1	5	1	0	0	0	0	0	1	1	0	1	56	31	30	47	30	0	0	47	0
0	0	0	1	0	0	M	52	20.2	0	138	5	1	0	77	102	72	6.66	190	14.744	786.92	6.7	45	2.52	71	0	1	4	1	1	0	0	0	1	1	0	0	0	57	30	27	47	28	0	1	68	0
0	0	0	1	1	0	M	76	22.83	1	147	5	0	0	79	126	76	10.14	221	14.964	1743.08	5.11	26	4.2	71	1	1	4	1	0	0	0	0	1	0	1	1	1	58	28	32	48	28	0	0	78	0
1	0	0	0	1	0	M	58	23.38	1	156	3	0	0	74	92	62	8.18	124	18	67	6.02	45	3.51	71	1	1	5	1	0	0	0	0	1	1	0	1	1	58	30	32	49	32	0	0	80	0
0	0	0	1	0	1	M	56	24.8	1	154	5	0	0	66	110	76	10.23	108	0.014	86	6.39	64	1.29	71	0	1	4	1	1	1	1	0	1	0	0	0	0	54	33	30	49	29	0	1	97	0
0	0	0	1	0	0	M	51	26.85	1	157	5	0	0	62	130	65	8.69	252	0.2	132.44	5.02	24	2.34	71	1	1	4	1	0	1	0	0	1	0	0	0	0	54	33	30	49	29	0	0	82	0
1	0	0	0	1	0	M	50	28.17	0	118	5	0	0	68	115	70	5.67	241	1.185	319	6.79	13	1.05	71	1	1	4	3	1	0	0	0	1	0	0	0	0	54	33	30	49	29	0	0	58	0
0	0	0	1	0	0	M	65	23.88	1	130	0	0	0	61	124	74	10.47	225	14.514	1095.83	5.12	37	2.14	71	0	1	7	1	0	0	0	0	1	0	0	0	0	54	33	30	49	29	0	0	86	0
1	0	0	0	0	1	M	46	26.67	1	145	5	0	0	58	132	78	9.02	206	16	1	4.89	18	2.52	71	1	1	5	1	0	1	0	0	1	0	0	0	0	53	27	30	50	31	0	1	79	0
1	0	0	0	1	0	F	58	28.54	0	141	3	0	0	70	102	68	7.42	320	0.862	1884.62	4.89	56	2.56	71	1	1	4	2	0	1	0	0	0	2	0	0	0	37	29	25	50	24	0	0	59	0
0	0	0	1	0	0	M	67	21.45	1	149	3	0	0	78	112	72	9.49	170	0.8	172	5.77	33	3.33	71	1	1	4	1	1	0	0	0	1	0	0	0	1	59	34	33	51	34	0	1	91	0
1	0	0	0	1	0	M	51	30.07	1	144	5	0	0	100	134	83	12.86	237	15.965	1275.88	7.09	30	3.08	71	1	1	5	1	1	1	0	0	0	0	0	0	0	47	32	29	51	29	0	0	68	0
1	0	0	0	0	0	M	75	24.98	1	139	4	0	0	96	177	83	17.52	311	1.012	8258.58	11.54	14	2.92	71	0	1	4	1	1	1	0	0	1	1	1	0	0	43	37	34	52	28	0	0	80	0
0	0	0	1	1	0	M	36	23.84	0	142	3	0	0	61	101	67	2.28	132	16	1239.23	6.7	29	2.12	71	0	1	4	1	0	0	0	0	0	0	1	0	1	51	30	35	54	32	0	0	71	0
0	0	0	1	0	0	M	48	26.77	1	164	5	0	0	75	120	80	21.55	251	16	172.45	5.54	55	3.66	71	1	1	4	1	0	0	0	0	1	0	0	0	1	57	39	26	55	30	0	0	101	0
0	0	0	1	1	1	M	77	26.85	0	98	5	0	0	74	120	80	5.81	88	16	4496.13	6.51	53	2.06	71	0	1	4	1	0	1	0	0	1	0	1	1	1	52	39	29	55	32	0	0	102	0
0	0	0	1	1	0	F	68	19.99	0	123	5	0	0	110	116	80	9.3	181	5.339	10563.8	5.84	30	2.4	71	0	1	5	2	0	1	0	0	1	0	0	0	0	23	30	25	62	24	0	1	1	1
0	0	0	1	1	0	M	60	27.92	1	161	3	0	0	72	130	70	7.73	204	0.001	564	4.68	23	2.61	71	1	1	5	1	1	0	0	0	1	0	1	0	0	32	43	34	72	32	0	0	70	0
0	0	0	1	1	1	M	78	17.58	1	130	1	0	0	69	102	60	13.45	184	2.919	779.62	5.15	13	3.39	72	1	1	4	2	0	0	0	0	1	1	1	1	1	65	31	29	39	28	0	0	47	0
1	0	0	0	0	0	F	63	26.22	0	105	3	1	0	83	118	58	6.85	123	10.499	2419.57	10.34	22	2.96	72	0	1	7	3	1	0	0	0	2	1	2	1	0	45	37	34	40	31	0	1	9	1
0	0	0	1	1	0	M	60	21.88	1	149	5	0	0	75	140	78	8.57	115	16	587.76	11.02	31	4.08	72	1	1	4	1	0	0	0	0	0	1	1	0	1	56	25	31	41	27	0	0	84	0
0	0	0	1	1	0	M	85	17.1	1	124	0	0	0	70	98	53	9.03	217	1.975	8074.83	6.22	25	1.94	72	1	1	7	2	0	0	0	0	0	1	1	1	0	37	28	34	41	31	0	0	46	1
1	0	0	0	0	0	F	70	20.83	0	118	0	0	0	60	136	72	5.8	193	0.175	3030.91	6.3	22	2.65	72	0	1	4	1	0	0	0	0	0	0	1	0	0	50	29	31	42	28	0	1	77	0
0	0	0	1	0	0	F	83	33.3	0	146	3	0	0	118	92	69	10.28	288	9.512	13413.7	7.47	67	3.25	72	0	1	5	2	0	0	0	0	1	0	1	0	1	56	22	27	42	27	0	0	80	0
0	0	0	1	0	0	F	66	23.83	0	117	5	0	0	65	125	70	9.41	165	0.25	1270	5.34	18	2.29	72	0	1	4	2	0	1	0	0	1	0	0	0	1	73	28	31	43	30	0	1	69	0
0	0	0	1	0	0	M	62	21.6	1	158	3	0	0	65	90	68	8.48	152	16	1902.31	7.12	44	3.13	72	1	1	5	1	0	0	0	0	0	0	1	0	1	61	29	27	44	28	0	0	70	0
0	0	0	1	1	0	F	72	25.39	0	121	5	0	0	94	120	76	10.81	276	3.899	2592.6	4.1	31	2.17	72	1	1	5	1	0	1	0	0	0	0	0	1	0	61	30	27	44	27	0	0	59	0
0	0	0	1	0	0	M	50	22.84	1	137	5	0	0	87	118	74	10.86	266	10.07	2638.76	7.33	36	5.98	72	1	1	4	1	1	0	0	0	1	0	1	0	1	56	34	32	46	32	0	0	102	0
0	0	0	1	0	0	F	56	21.6	0	106	7	0	0	114	156	88	10.15	226	4.933	5092.02	16.64	22	2.52	72	0	1	4	2	1	1	1	0	1	1	1	0	0	45	38	29	46	26	0	0	20	1
0	0	0	1	0	0	M	43	28.28	0	153	1	0	0	74	120	72	11.77	190	13.672	659.16	4.96	30	3.64	72	1	1	4	1	0	1	0	0	0	0	0	1	1	73	27	28	47	28	0	0	81	0
0	0	0	1	0	0	M	77	22.41	1	130	7	0	0	80	181	84	3.23	93	0.201	1228.75	5.65	32	1.56	72	1	1	4	1	1	1	0	0	1	0	1	0	1	63	33	25	47	25	0	1	49	0
0	0	0	1	0	0	M	52	22.72	1	131	3	0	0	74	118	90	10.87	242	1.214	1280.87	5.54	24	1.9	72	1	1	4	1	0	0	0	0	1	0	0	0	1	59	39	32	47	32	0	0	57	0
1	0	0	0	0	0	M	75	18.59	1	133	0	0	0	52	129	70	6.88	165	4.661	2836.91	4.78	18	1.9	72	1	1	4	2	0	1	0	0	1	0	1	0	0	53	27	30	47	25	0	0	56	0
0	0	0	1	1	1	M	65	24.57	1	154	5	0	0	69	132	60	13.71	174	13.272	191.97	6.93	120	3.49	72	1	1	5	1	1	1	0	0	1	0	0	0	0	51	28	28	48	31	0	1	67	0
0	0	0	1	0	0	M	68	19.95	1	118	5	0	0	96	142	78	6.06	170	6.288	1354.65	4.59	12	2.95	72	1	1	4	1	0	0	1	0	0	0	0	1	0	62	32	32	48	29	0	1	102	0
0	0	0	0	0	0	M	57	24.22	1	139	5	0	0	68	136	62	8.06	138	16	105.14	5.36	25	1.75	72	0	1	4	1	0	0	0	0	1	0	0	0	0	54	33	30	49	29	0	0	99	0
0	0	0	1	0	0	M	79	19.96	1	122	5	0	0	72	136	78	6.9	217	3.813	2199.9	3.89	15	2.4	72	1	1	4	1	0	1	0	0	1	0	0	0	0	54	33	30	49	29	0	0	36	1
0	0	0	1	1	1	M	54	28.73	1	127	1	0	0	106	135	87	10.62	158	5.429	2581.11	14.02	25	1.21	72	1	1	7	2	1	0	0	0	1	0	0	0	0	46	31	32	49	30	0	0	52	0
0	0	0	1	0	0	M	63	25.17	1	140	7	0	0	71	122	88	7.83	278	3.06	2151.08	4.99	31	2.33	72	1	1	4	1	0	1	0	0	1	1	1	0	0	50	33	32	50	34	0	0	55	0
0	0	0	1	0	0	M	55	25.26	0	139	5	0	0	72	132	76	8.36	415	0.001	303.43	5.34	20	2.25	72	0	1	4	1	0	1	0	0	1	0	0	0	0	60	37	28	51	26	0	0	81	0
0	0	0	1	0	0	M	54	24	1	68	5	0	0	99	148	88	11.77	160	6.468	1572.72	6.7	48	1.14	72	1	1	4	1	1	1	0	0	0	0	0	0	0	69	30	34	53	28	0	0	92	0
1	1	1	0	0	0	M	70	24.77	0	148	5	1	0	70	145	97	5.7	195	0.081	1502.64	4.67	102	0.88	72	1	1	5	1	0	1	0	0	1	1	1	0	0	39	34	31	54	29	0	1	44	0
0	0	0	1	0	0	M	50	26.2	1	126	5	0	0	57	120	80	6.25	239	0.035	2633.03	7.21	20	1.65	72	1	1	4	2	1	1	0	0	1	0	0	0	1	63	39	34	54	32	0	0	50	0
0	0	0	1	0	0	M	55	23.8	1	159	5	0	0	69	108	67	9.92	207	16	1348.92	6.28	55	1.88	72	1	1	5	2	0	0	0	0	1	0	1	0	0	48	38	31	57	30	0	1	51	0
0	0	0	1	0	0	F	74	24.03	0	109	5	0	0	64	130	90	5.62	107	0.511	1783.43	5.04	24	2.12	72	1	1	4	1	0	0	0	0	2	1	1	1	1	40	33	38	58	33	0	0	98	0
1	0	0	0	0	0	M	59	22.66	0	131	5	0	0	84	146	78	5.88	88	16	2638.76	6.59	19	2.09	73	1	1	5	1	1	0	0	0	0	0	0	0	1	63	30	30	40	29	0	0	80	0
1	0	0	0	1	1	M	58	24.52	1	134	5	0	0	82	121	74	8.2	183	14.98	327.92	5.48	49	3.95	73	1	1	4	2	0	0	0	0	2	1	1	1	1	48	29	30	41	30	0	0	98	0
1	0	0	0	1	0	M	78	24.8	1	136	7	0	0	72	154	80	6.58	237	2.566	987.85	7.27	23	1.91	73	0	1	4	2	0	1	0	0	0	1	0	0	0	47	26	26	42	29	0	1	65	0
0	0	0	1	0	0	M	65	24.39	1	121	5	0	0	78	128	76	7.55	230	0.28	2187.11	4.5	27	2.62	73	1	1	7	1	1	1	1	0	0	0	1	0	1	66	35	29	43	28	0	0	57	0
0	0	0	1	1	0	M	58	22.72	0	128	5	0	0	69	100	70	6.3	168	0.03	1870.29	4.84	18	1.56	73	1	1	4	1	0	0	0	0	1	0	0	0	1	56	38	29	44	29	0	0	75	0
0	0	0	1	1	0	M	42	28.34	1	149	4	0	0	99	115	64	9.58	229	4.628	884.56	10.48	94	1.56	73	0	1	5	1	1	1	0	0	0	0	0	0	0	51	33	27	46	27	0	1	48	0
1	0	0	0	1	0	F	63	28.04	0	136	5	0	0	76	116	62	9.51	168	7.1	2638.76	5.25	34	3.49	73	1	1	4	1	1	0	0	0	0	0	0	0	1	61	31	32	46	30	0	1	97	0
1	0	0	0	0	0	M	71	23.83	1	132	5	1	0	65	124	62	11.7	227	10.827	2886.06	7.79	26	3.73	73	0	1	4	1	1	1	0	0	0	1	0	1	1	67	27	28	46	27	0	1	70	0
0	0	0	1	1	1	M	55	23.03	1	140	5	0	0	70	140	90	16.75	221	4.99	98.66	9.51	136	4.6	73	1	1	4	1	1	0	0	0	1	0	1	0	1	68	29	28	47	25	0	0	100	0
1	0	0	0	0	0	M	57	28.4	0	130	3	0	0	90	100	60	9.48	212	11.288	328.98	7.39	59	2.85	73	0	1	7	1	1	0	0	0	0	0	1	0	1	55	32	30	48	31	0	0	67	0
0	0	0	1	0	1	M	53	30.04	1	139	5	1	0	105	128	76	18.67	319	1.753	442.65	7.84	155	3.5	73	1	1	5	1	0	1	1	0	0	1	0	0	0	57	35	34	48	33	0	1	49	0
0	0	0	1	0	0	M	71	22.04	1	125	5	0	0	77	156	83	7.81	209	1.989	216.07	8.88	22	2.55	73	0	1	4	1	1	1	1	0	0	0	0	0	1	54	33	30	49	29	0	0	81	0
0	0	0	1	0	0	M	62	22.32	1	153	3	1	0	66	142	74	10.5	263	3.155	225.35	5.89	39	2.63	73	1	1	5	1	0	0	0	0	1	0	1	0	0	53	38	33	49	29	0	1	49	0
0	0	0	1	1	0	M	49	29.38	1	168	5	0	0	98	137	90	12.25	290	12.814	297.48	6.18	56	3.88	73	0	1	5	1	0	0	0	0	0	0	0	0	0	51	34	29	49	32	0	0	73	0
0	0	0	1	1	0	F	75	25.39	1	100	5	0	0	99	129	66	7.37	287	0.079	984.02	5.32	11	2.22	73	1	1	4	1	0	1	1	0	1	0	0	0	0	54	33	30	49	29	0	0	69	0
0	0	0	1	1	0	M	52	25.86	1	141	5	0	0	67	120	80	5.55	177	0.312	2638.76	17.47	41	2.55	73	1	1	4	1	1	1	0	0	1	0	0	0	0	54	33	30	49	29	0	0	71	0
1	0	0	0	0	0	M	43	28.36	1	156	7	1	0	75	125	80	7.25	165	0.004	354.92	11.25	39	0.88	73	0	1	4	1	1	1	0	0	1	0	1	0	1	49	36	31	50	27	0	1	66	0
0	0	0	1	0	0	M	54	27.77	1	142	1	0	0	78	153	86	8.99	169	1.85	963.96	5.48	33	1.96	73	1	1	4	2	1	1	0	0	1	0	0	0	1	55	34	35	50	35	0	0	52	0
0	0	0	1	1	0	M	45	23.53	1	129	5	0	0	48	124	84	9.1	259	4.339	1270.47	4.71	45	3.47	73	1	1	4	1	0	1	1	0	0	0	0	0	1	58	31	33	51	28	0	0	78	0
1	0	0	0	1	0	M	54	22.72	1	141	5	0	0	68	122	84	7.39	149	5.783	2098	5.1	25	5.57	73	0	1	4	1	0	0	0	0	1	1	1	0	0	49	34	32	51	30	0	1	77	0
1	0	0	0	1	1	M	70	24.42	1	135	5	1	0	90	158	82	9.12	199	16	3935.82	6.37	24	1.41	73	1	1	5	2	1	1	0	0	1	0	1	0	0	46	42	35	52	32	0	1	45	0
1	0	0	0	1	0	M	58	24.88	1	134	5	0	0	68	102	50	6.78	258	10.099	2109.2	5.75	43	2.97	73	1	1	4	1	0	1	1	0	1	1	1	0	0	40	36	28	55	28	0	1	75	0
0	0	0	1	1	0	M	60	19.82	1	119	5	0	0	81	100	60	8.74	171	6.34	3139.84	3.87	42	2.33	73	1	1	4	4	0	0	0	1	2	0	1	0	1	49	37	27	57	28	0	1	100	0
1	0	0	0	0	0	F	68	24.44	0	135	7	0	0	75	176	75	10.37	225	0.001	611.17	7.66	6	3.73	74	0	1	4	2	1	1	0	0	0	0	0	0	0	66	25	23	36	27	0	1	80	0
1	0	0	0	1	0	F	46	21.23	1	138	7	0	0	68	158	86	4.98	179	4.12	354.4	5.55	20	3.71	74	1	1	4	1	0	1	0	0	0	0	1	0	1	74	24	27	39	25	0	0	68	0
0	0	0	1	0	0	M	65	24.61	1	125	5	0	0	76	118	64	18.6	192	1.916	2465.06	7.11	72	2.28	74	0	1	5	1	1	1	0	0	1	1	1	0	1	69	26	30	41	32	0	0	83	0
0	0	0	1	0	1	M	34	26.89	0	151	5	0	0	92	152	94	8.32	232	5.687	2638.76	6.7	14	3.11	74	0	1	4	1	0	1	0	0	1	0	2	0	0	37	29	43	41	38	0	0	81	0
0	0	0	1	0	0	M	49	25.07	1	147	7	0	0	74	158	104	17.15	281	5.627	532.47	7.27	32	2.18	74	1	1	5	1	1	0	0	0	0	0	0	0	1	60	25	27	42	29	0	1	53	0
0	0	0	1	0	0	M	58	22.04	1	140	5	0	0	90	124	78	10.06	196	2.515	632.12	5.55	16	2.86	74	1	1	4	1	0	0	0	0	1	0	0	0	1	66	32	27	43	26	0	0	75	0
1	0	0	0	1	0	M	66	49.95	1	120	1	0	0	55	154	72	5.39	219	2.933	1258.51	4.66	12	2.71	74	1	1	7	1	0	0	0	0	0	0	1	1	1	75	28	33	43	32	0	0	80	0
1	0	0	0	0	0	M	51	28.49	0	139	5	0	0	69	165	98	11.39	255	8.356	164.63	6.34	35	2.82	74	1	1	5	1	0	1	0	0	0	0	0	0	1	72	32	30	44	28	0	1	69	0
0	0	0	1	0	1	M	62	26.08	0	151	7	0	0	55	136	69	7.34	133	10.385	464.01	8.38	35	1.73	74	1	1	4	1	1	1	0	0	0	1	0	1	1	77	31	32	44	31	0	0	12	1
1	0	0	0	0	0	M	51	28.28	1	134	5	0	0	63	111	52	13.14	309	16	1262.76	4.27	57	4.42	74	1	1	5	1	0	1	0	0	1	1	1	0	1	51	44	40	44	32	0	0	79	0
1	0	0	0	0	1	F	64	23.56	0	131	3	0	0	98	107	77	13.77	236	10.448	2638.76	4.43	54	2.11	74	1	1	5	1	1	1	0	0	0	0	0	0	0	49	34	28	45	26	0	1	47	0
1	0	0	0	0	0	F	78	23.88	0	98	7	0	0	65	150	80	4.92	188	0.499	2090.07	5.44	45	1.85	74	0	1	4	1	0	1	0	0	1	1	0	1	1	60	28	32	46	32	0	1	80	0
1	0	0	0	0	0	M	50	19.95	0	130	0	0	0	67	74	45	3.73	231	0.507	1400.38	6.23	54	3.58	74	0	1	4	1	1	0	0	0	1	0	1	0	0	67	33	27	47	26	0	0	73	0
0	0	0	1	0	0	F	60	23.42	0	120	5	0	0	74	148	76	4.05	174	6.298	538.59	6.7	45	2.52	74	1	1	4	1	0	1	0	0	0	0	1	0	0	61	27	31	48	29	0	1	74	0
1	0	0	0	0	1	M	62	25.86	1	117	3	0	0	78	140	78	12.98	218	0.246	30.55	4.24	10	3.81	74	1	1	4	1	1	0	0	0	1	0	0	0	0	54	33	30	49	29	0	0	89	0
1	0	0	0	1	1	M	42	20.7	1	148	7	0	0	68	150	87	7.72	278	0.015	155.05	4.9	38	3.26	74	1	1	5	1	0	0	0	0	1	0	0	0	0	54	33	30	49	29	0	0	68	0
0	0	0	1	0	0	F	59	26.94	1	99	5	0	0	64	92	60	7.39	194	6.621	191.1	7.41	35	3.72	74	1	1	4	1	1	0	0	0	1	0	0	0	0	54	33	30	49	29	0	0	103	0
1	0	0	0	0	0	M	54	24.84	1	134	5	0	0	90	146	95	7.94	199	14.808	628.19	7.96	45	2.63	74	0	1	4	1	1	1	0	0	1	0	0	0	0	54	33	30	49	29	0	0	101	0
0	0	0	1	0	0	M	75	23.05	0	122	0	0	0	48	144	78	9.33	151	7.639	1708.44	7.8	43	2.84	74	0	1	4	1	1	1	0	0	1	0	0	0	0	54	33	30	49	29	0	1	88	0
1	0	0	0	1	0	M	39	25.34	1	131	5	0	0	68	122	65	9.62	166	13.23	2600.52	6.7	40	2.8	74	1	1	4	1	0	0	0	0	0	0	1	0	0	77	29	30	49	32	0	0	61	0
1	0	0	0	0	0	M	57	19.53	0	136	5	0	0	62	110	58	9.69	222	0.103	4756.45	4.57	21	2.12	74	1	1	2	1	0	0	0	0	1	0	0	0	0	54	33	30	49	29	0	0	55	0
0	0	0	1	0	0	F	69	23.94	0	117	0	0	0	92	107	61	10.76	246	3.498	7515.37	6.7	32	2.52	74	0	0	0	1	0	0	0	0	1	0	0	0	0	54	33	30	49	29	0	0	22	1
0	0	0	1	0	1	M	42	22.86	1	128	3	0	0	84	104	72	14.28	378	3.692	148.64	5.99	112	3.93	74	1	1	4	3	0	0	0	0	1	0	1	0	0	43	32	30	50	32	0	0	76	0
0	0	0	1	1	0	M	57	26.18	1	152	7	0	0	96	136	88	11.27	158	16	927.53	5.92	45	2.12	74	0	1	5	1	0	1	0	0	0	0	1	1	0	53	27	27	51	26	0	1	81	0
0	0	0	1	1	0	M	51	23.32	1	140	5	0	0	91	110	74	10.05	165	12.401	1883.29	4.96	135	2.18	74	1	1	4	2	0	0	0	0	1	0	0	0	0	53	33	27	51	29	0	0	55	0
0	0	0	1	0	0	F	62	27.34	0	139	7	0	0	76	156	116	5.8	296	1.32	722.72	4.99	39	2.98	74	1	1	4	1	0	1	1	0	1	0	0	0	0	69	37	31	52	30	0	1	72	0
0	0	0	1	0	0	M	75	26.18	1	123	5	0	0	66	164	90	7.09	220	0.021	2576.75	6.7	18	2.52	74	1	1	4	1	0	1	1	0	0	0	1	1	0	52	38	29	53	28	0	0	71	0
1	0	0	0	1	1	M	48	18.29	0	139	1	0	0	59	128	89	10.35	227	16	173.88	6.7	106	2.48	74	1	1	5	1	0	1	0	0	0	0	1	0	0	38	32	25	54	27	0	0	61	0
0	0	0	1	0	1	M	73	21.3	1	135	5	0	0	68	142	83	7.15	197	2.113	281.46	6.43	15	3.52	74	0	1	5	1	0	0	0	0	0	1	0	0	1	52	27	35	54	34	0	0	52	0
0	0	0	1	1	0	M	58	27.84	1	136	5	0	0	83	104	70	5.47	262	0.017	918.22	5.2	27	2.71	74	1	1	4	1	0	0	0	0	0	0	1	0	0	47	31	31	55	31	0	0	66	0
0	0	0	1	1	0	M	45	21.22	1	144	3	0	0	99	104	74	4.76	298	0.032	511.11	13	13	1.82	74	0	1	4	1	1	0	1	0	1	0	0	0	0	64	40	26	57	26	0	0	4	1
0	0	0	1	0	0	M	51	30.86	1	125	1	0	0	66	110	70	12.1	277	0.107	1316.99	4.64	25	3.22	74	1	1	4	1	0	1	0	0	1	0	1	0	0	34	37	38	57	31	0	1	63	0
0	0	0	1	1	0	M	62	24.98	1	155	7	0	0	95	135	90	13.29	233	15.134	2252.36	10.18	45	3.38	74	1	1	5	1	0	0	0	0	0	1	0	1	0	49	32	34	57	34	0	1	70	0
1	0	0	0	1	0	M	62	22.84	0	128	5	0	0	81	130	84	9.56	336	4.536	5093.76	6.11	71	2.17	74	1	1	4	1	0	0	0	0	1	0	0	0	0	30	40	33	61	32	0	0	62	0
0	0	0	1	0	0	M	58	21.22	1	161	5	0	0	78	98	62	11.32	150	16	474.63	6.65	79	3.61	75	1	1	5	1	1	1	0	0	1	0	1	0	0	49	29	30	37	28	0	0	77	0
0	0	0	0	1	0	F	57	28.04	0	103	0	0	0	82	74	48	13.29	211	3.301	751.18	8.4	30	2.52	75	0	0	0	4	0	0	0	0	0	0	0	0	0	36	22	26	38	29	0	0	3	1
0	0	0	1	0	0	M	58	21.83	0	161	5	0	0	62	115	72	7.43	237	0.001	231.93	4.35	28	1.96	75	1	1	4	1	0	0	0	0	1	0	0	0	0	67	27	30	42	29	0	1	60	0
1	0	0	0	1	0	M	29	24.8	0	104	5	0	0	90	101	80	8.71	202	5.109	1041.2	4.66	43	1.93	75	0	1	4	1	0	0	0	0	0	0	0	1	0	46	28	28	42	32	0	0	52	0
0	0	0	1	0	0	F	56	30.43	0	156	5	0	0	88	153	102	6.55	251	1.802	162.57	7.3	80	3.67	75	1	1	5	2	0	1	1	0	0	0	0	0	0	67	29	29	43	29	0	1	70	0
0	0	0	1	0	0	M	72	24.24	0	125	7	0	0	70	120	80	6.63	108	0.564	750.38	5.46	92	1.7	75	1	1	4	2	0	1	1	0	1	0	0	0	1	64	31	29	45	28	0	1	68	0
0	0	0	1	1	1	F	73	19.23	1	116	5	0	0	69	130	70	3.64	127	2.028	3148.38	4.46	25	1.61	75	1	1	4	1	0	1	0	0	1	1	1	0	0	43	35	23	45	24	0	0	48	0
0	0	0	1	0	0	M	71	17.7	1	121	0	0	0	56	102	62	10.31	200	12.347	1000.16	6.95	29	2.48	75	0	1	4	2	0	0	0	0	1	0	0	0	0	65	33	27	46	31	0	0	75	0
1	0	0	0	0	0	F	71	22.07	0	126	5	0	0	75	124	56	4.51	142	1.03	2638.76	4.25	26	2.53	75	0	1	4	3	0	1	0	0	1	2	0	0	0	30	40	24	46	22	0	0	66	0
1	0	0	0	0	0	M	45	20.94	0	126	7	0	0	71	130	84	6.45	185	1.749	2638.76	5.49	18	1.53	75	0	1	4	1	0	0	0	0	0	0	0	0	0	78	24	24	46	25	0	0	76	0
1	0	0	0	0	0	M	58	24.51	1	156	5	0	0	92	146	84	10.13	299	16	256.36	7.98	51	2.56	75	1	1	4	1	1	0	0	0	1	0	1	0	1	64	28	34	48	28	0	0	78	0
0	0	0	1	0	0	M	62	22.94	1	138	3	0	0	61	100	71	9.88	224	2.419	317.72	8.01	26	2.6	75	1	1	4	1	1	0	0	0	0	1	1	0	1	55	29	30	48	27	0	0	48	0
1	0	0	0	0	0	M	71	20.2	1	130	5	0	0	58	130	70	9.48	212	0.142	912.87	4.08	45	2.57	75	0	1	4	1	0	0	0	0	1	0	0	0	1	62	35	33	48	27	0	1	44	1
1	0	0	0	0	0	M	82	22.86	0	120	0	0	0	65	130	72	4.35	141	1.772	1981.82	9.09	19	2.45	75	0	1	4	1	1	1	0	0	2	0	1	1	1	56	33	32	48	32	0	0	24	1
0	0	0	1	1	0	M	80	23.03	1	126	5	0	0	64	137	73	6.94	194	16	4347.83	4.76	24	1.79	75	1	1	4	2	0	0	0	0	1	0	0	0	0	50	29	33	48	31	0	0	52	0
0	0	0	1	1	0	M	53	31.25	1	142	5	0	0	82	128	76	13.16	143	3.247	149.37	7.4	103	3.03	75	1	1	5	1	0	0	0	0	1	0	0	0	0	54	33	30	49	29	0	0	45	0
0	0	0	1	0	0	M	63	22.14	1	161	5	0	0	102	120	70	9.84	219	2.502	197.19	9.1	68	2.44	75	1	1	5	1	0	1	0	0	1	0	0	0	0	54	33	30	49	29	0	1	45	0
0	0	0	1	1	0	M	37	27.04	1	145	5	0	0	74	115	70	10.96	260	16	859.2	5.98	62	2.52	75	0	1	5	1	0	0	0	0	1	0	0	0	0	54	33	30	49	29	0	0	66	0
1	0	0	0	0	0	M	58	25.26	1	146	7	0	0	90	155	86	18.59	290	5.472	953.74	7.26	40	2.8	75	1	1	5	2	1	1	0	0	1	0	0	0	0	54	33	30	49	29	0	1	66	0
0	0	0	1	0	1	M	73	25.46	1	157	5	0	1	100	138	100	7.89	125	0.13	2485.37	5.17	16	2.27	75	0	1	4	1	0	0	0	0	1	0	0	0	0	54	33	30	49	29	0	0	99	0
0	0	0	1	0	1	M	69	23.53	0	147	3	1	0	75	131	78	10.06	205	0.642	2638.76	6.97	25	3.97	75	0	1	4	1	0	0	0	0	1	0	0	0	0	54	33	30	49	29	0	1	74	0
1	0	0	0	0	0	M	71	23.94	0	128	3	0	0	129	170	89	7.12	123	0.65	3460	9.77	39	2.3	75	0	1	4	3	1	1	0	0	1	0	0	0	0	54	33	30	49	29	0	0	1	1
1	0	0	0	1	1	M	59	25.12	1	129	7	0	0	88	128	78	13.53	298	16	135.69	7.9	109	3.33	75	1	1	5	1	0	1	0	0	0	0	0	1	1	54	24	33	50	34	0	0	83	0
0	0	0	1	0	0	M	64	22.59	1	151	5	1	0	75	100	60	18.94	239	2.446	859.45	7.82	43	3.19	75	1	1	4	1	1	0	0	0	2	0	0	0	1	57	35	31	54	33	0	1	73	0
1	0	0	0	1	0	M	44	28.73	1	145	3	0	0	88	99	71	13.3	185	16	1143.94	4.54	120	3.21	75	1	1	4	1	0	0	0	0	1	0	1	0	0	52	30	30	55	30	0	0	83	0
0	0	0	1	1	0	M	63	26.99	1	116	5	0	0	83	130	78	8.2	269	8.879	6822.31	4.01	22	1.9	75	0	1	1	2	0	0	0	0	2	0	1	1	0	42	39	40	60	37	0	0	3	1
1	0	0	0	0	0	F	45	19.97	0	135	5	0	0	74	108	80	17.11	199	2.481	2758.35	4.25	62	1.89	75	1	1	5	2	0	0	0	0	2	0	2	1	0	26	40	34	65	32	0	0	71	0
0	0	0	1	0	0	M	44	22.98	1	136	5	0	0	77	107	77	14.34	264	7.353	1453.68	4.98	34	2.43	76	1	1	4	1	1	0	0	0	2	0	2	0	0	61	31	35	40	32	0	1	48	0
0	0	0	1	0	1	M	62	21.48	0	133	1	0	0	68	148	82	9.33	167	1.143	267.3	15.77	20	2.89	76	0	1	5	1	1	1	0	0	0	0	0	1	0	64	29	27	42	31	0	1	56	1
0	0	0	1	0	0	M	58	30.44	1	128	7	0	0	76	176	112	5.93	223	1.236	2994.76	5.47	27	3.82	76	0	1	4	2	0	1	1	0	0	0	0	0	0	68	34	34	42	31	0	0	88	0
0	0	0	1	0	0	F	67	22.6	1	113	5	0	0	76	140	70	8.28	248	2.157	518.32	4.94	21	3.76	76	0	1	4	1	0	1	1	0	0	0	0	0	1	71	29	30	43	30	0	1	71	0
1	0	0	0	0	0	M	72	22.49	0	159	7	0	0	78	135	80	9.2	330	16	682.53	5.62	23	1.65	76	0	1	4	1	1	1	0	0	1	1	0	0	1	68	34	32	44	29	0	0	52	0
0	0	0	1	1	0	M	53	24.51	1	146	3	0	0	65	135	96	9.24	229	2.559	758.02	9.46	81	1.6	76	1	1	5	1	1	1	0	0	0	0	0	0	0	47	28	27	45	28	0	1	46	0
0	0	0	1	1	0	F	77	16.56	0	99	7	0	0	122	144	92	11.92	380	10.181	9311.85	8.1	16	3.29	76	0	1	5	2	1	1	0	0	1	1	0	0	0	49	31	26	45	26	0	0	79	0
0	0	0	1	0	0	M	61	25.27	1	152	4	0	0	70	180	110	7.46	161	0.28	156.84	5.75	34	3.7	76	1	1	4	1	0	1	0	0	0	0	0	1	0	62	34	33	46	30	0	0	83	0
0	0	0	1	1	0	M	66	22.21	1	134	5	0	0	88	128	88	10.09	175	16	1187.31	8.12	62	2.33	76	1	1	5	1	0	0	0	0	0	0	1	0	0	46	35	35	46	30	0	0	28	1
0	0	1	1	1	0	M	61	20.2	1	142	5	0	0	98	128	76	5.33	176	0.077	347.97	5.31	45	1.7	76	1	1	5	1	0	1	0	0	0	0	0	0	0	50	26	27	47	30	0	0	45	0
1	0	0	0	0	0	M	52	23.88	0	132	5	0	0	75	128	76	11.3	257	2.555	1728.09	6.7	46	2.4	76	1	1	5	1	0	1	0	0	1	1	1	0	1	54	38	35	47	31	0	0	50	0
0	0	0	1	1	0	M	42	20.21	1	154	3	0	0	96	142	90	20.93	342	11.652	2168.7	8.46	73	6.26	76	1	1	5	1	0	0	0	0	0	0	0	1	0	63	34	34	47	31	0	0	68	0
0	0	0	1	0	0	M	44	27.68	1	145	5	0	0	66	154	68	9.48	209	16	1008.76	6.41	27	4.45	76	0	1	4	1	1	1	0	0	0	0	0	0	0	64	33	29	48	30	0	1	76	0
0	0	0	1	1	0	M	52	21.77	1	165	5	0	0	64	106	60	13.15	202	16	1932.65	4.28	63	3.48	76	1	1	5	1	0	1	0	0	1	0	1	0	1	63	32	29	48	25	0	0	71	0
1	0	0	0	0	0	M	70	23.18	0	130	3	0	0	70	90	56	11.04	175	10.54	3075.54	4.35	27	1.93	76	1	1	4	1	0	0	0	0	0	0	0	1	1	57	29	27	48	24	0	0	57	0
1	0	0	0	1	1	M	54	25.34	1	160	5	1	0	76	128	76	15.84	356	1.666	75.73	7.74	104	2.19	76	1	1	5	1	1	1	0	1	0	0	0	0	1	62	30	33	49	33	0	1	46	0
0	0	0	1	0	0	M	60	27.34	1	171	7	0	0	79	175	80	10.72	244	2.428	144	15.18	35	3.69	76	0	1	4	1	1	1	1	0	0	0	1	0	1	64	30	28	49	28	0	1	77	0
1	0	0	0	0	1	M	31	23.14	1	157	3	0	0	70	132	88	10.04	304	6.667	196.37	4.97	59	1.81	76	0	1	4	1	1	0	0	0	1	0	0	0	0	54	33	30	49	29	0	0	69	0
0	0	0	1	1	0	M	60	25.25	1	146	5	0	0	74	129	55	7.82	314	5.429	1345.33	5.53	46	2.76	76	1	1	4	1	0	1	0	0	1	0	0	0	0	54	33	30	49	29	0	0	51	0
0	0	0	1	0	0	M	62	20.18	1	144	5	0	0	70	100	66	4.8	155	0.001	1399.14	4.58	22	3.23	76	0	1	4	1	0	0	0	0	1	0	0	0	1	58	27	35	49	36	0	0	98	0
0	0	0	0	0	0	M	76	27.34	0	118	0	0	0	75	122	66	11.02	138	16	1545.18	5.43	28	1.83	76	0	1	4	1	0	0	1	0	1	0	0	0	0	54	33	30	49	29	0	1	49	1
1	0	0	0	0	0	M	63	24.03	1	105	1	0	0	66	122	74	9.21	80	16	2469.53	6.01	41	1.7	76	0	1	5	1	0	0	0	0	1	0	0	0	0	54	33	30	49	29	0	0	82	0
0	0	0	1	0	0	M	51	25.71	1	130	6	0	0	83	140	90	7.9	291	0.348	2635.11	4.1	45	2.25	76	0	1	5	1	0	1	0	0	1	0	0	0	0	54	33	30	49	29	0	1	48	0
0	0	0	1	0	0	M	58	27.82	0	131	5	0	0	82	102	75	7.76	255	0.067	2638.76	5.41	50	1.84	76	1	1	4	1	0	1	0	0	1	0	0	0	0	54	33	30	49	29	0	0	76	0
0	0	0	1	0	0	M	64	19.83	1	129	1	0	0	59	97	61	11.02	226	16	3653.65	5.96	36	2.4	76	1	1	4	2	0	0	0	0	0	0	0	0	0	54	33	30	49	29	0	0	69	0
0	0	0	1	1	1	F	87	22.48	0	130	0	0	0	88	155	85	13.33	224	7.781	10454.9	6.04	19	3.58	76	0	1	4	2	0	0	1	0	1	0	0	0	0	54	33	30	49	29	0	0	45	1
1	0	0	0	1	1	M	52	26.01	1	154	5	0	0	85	137	96	7.92	218	16	1	6.63	36	3.22	76	1	1	5	1	0	0	0	0	1	0	1	0	1	61	27	30	50	25	0	0	46	0
1	0	0	0	0	0	F	69	17.59	0	112	4	0	0	113	154	77	9.8	238	0.698	5606.01	7.2	26	2.32	76	1	1	4	4	1	1	0	0	1	1	1	0	0	43	35	26	50	28	0	1	59	0
0	0	0	1	1	0	M	45	26.93	1	159	5	0	0	64	132	90	6	286	0.933	294.08	8.31	45	3.1	76	1	1	4	1	0	0	0	0	0	0	0	1	1	51	30	31	51	27	0	0	103	0
1	0	0	0	1	0	F	74	27.12	0	129	5	0	0	81	111	75	10.27	225	1.963	1803.1	7.72	103	2.86	76	0	1	5	2	0	1	0	0	3	1	2	1	0	49	44	31	53	30	0	0	71	0
0	0	0	1	1	1	M	60	26.22	1	156	5	0	0	68	136	78	5.87	228	9.241	1216.46	6.22	55	3.81	76	0	1	4	1	1	1	1	0	0	0	0	0	1	59	38	28	54	27	0	0	52	1
0	0	0	1	1	0	M	73	24.22	0	133	5	0	0	80	143	86	10.37	408	16	5035.64	9.11	30	2.33	76	1	1	4	2	1	1	1	0	1	0	1	0	0	50	31	32	55	29	0	1	63	0
0	0	0	1	0	0	M	77	28.96	0	118	3	0	0	70	120	64	5.63	197	0.028	3608.3	5.8	25	1.47	76	0	1	4	1	1	1	0	0	1	0	2	1	0	47	36	31	56	32	0	1	36	1
0	0	0	1	1	0	M	63	23.8	0	157	7	0	0	69	145	89	6.42	165	1.194	1190.82	3.68	48	1.57	76	1	1	4	2	0	1	0	0	2	0	0	0	0	45	38	33	57	31	0	0	52	0
0	0	0	1	0	0	M	48	31.25	1	132	5	1	0	65	110	80	13.5	253	16	1187.02	6.68	44	4.56	76	0	1	5	1	0	0	0	0	2	0	1	0	0	54	36	31	58	31	0	1	81	0
1	0	0	0	0	0	F	69	21.1	0	109	5	0	0	70	120	80	18.73	191	0.093	923.17	4.78	97	1.07	76	0	1	4	1	0	1	0	0	1	1	0	0	0	41	37	32	60	28	0	0	72	0
0	0	0	1	1	0	M	70	23.44	1	110	5	0	1	72	106	76	15.66	226	0.472	706.28	9.72	18	2.37	76	1	1	4	4	0	0	0	0	2	1	2	0	0	52	38	28	63	28	0	0	99	0
1	0	0	0	0	0	F	72	22.6	1	136	5	1	0	77	100	74	17.18	195	16	1326.7	6.88	48	3.04	77	0	1	4	3	0	0	0	0	1	1	0	0	1	44	31	24	23	54	0	1	95	0
1	0	0	0	1	0	M	68	19.38	1	113	5	0	0	68	132	80	6.86	390	0.001	413.46	6.32	18	1.83	77	0	1	5	1	0	1	0	0	0	0	0	0	0	72	27	31	38	25	0	0	74	0
0	0	0	1	0	1	M	26	24.49	0	123	0	0	0	88	100	58	9.52	168	6.843	903.18	6.33	10	4.61	77	0	1	7	1	0	0	0	0	1	0	0	0	0	47	36	45	38	36	0	0	72	0
1	0	0	0	1	1	F	76	22.19	0	106	5	0	0	68	109	73	9.65	197	16	1328.38	10.63	55	2.7	77	1	1	5	1	1	1	0	0	1	0	1	0	0	44	28	28	39	26	0	0	49	0
1	0	0	0	1	0	F	55	21.37	0	120	5	0	0	87	110	62	11.97	220	11.255	2990.6	6.57	79	2.38	77	0	1	5	1	0	1	0	0	0	0	1	1	0	46	37	28	42	25	0	0	48	0
1	0	0	0	0	0	M	63	22.33	1	131	5	0	0	63	150	83	5.6	243	0.243	133.54	5.46	22	2.17	77	1	1	4	1	0	0	0	0	1	0	1	1	1	57	32	34	43	29	0	0	47	0
1	0	0	0	0	0	M	53	20.76	1	147	5	0	0	72	122	75	5.99	166	16	563.64	3.98	19	2.14	77	1	1	5	1	0	0	0	0	0	0	1	0	0	54	31	28	43	27	0	0	49	0
0	0	0	1	0	1	F	40	25.39	0	128	3	0	0	94	82	56	18.55	240	16	226.79	15.42	138	1.49	77	1	1	5	4	1	1	0	1	1	0	1	0	0	64	38	31	44	31	0	0	55	0
0	0	0	1	0	0	M	64	23.74	1	129	3	0	1	61	118	76	11.84	194	16	1098.2	6.74	26	2.67	77	0	1	4	1	1	0	0	0	1	0	0	0	1	61	34	30	44	28	0	0	77	0
0	0	0	1	0	0	M	78	22.65	1	121	4	0	0	60	165	90	7.21	228	5.377	1025.24	4.86	15	2.19	77	0	1	4	1	0	1	0	0	0	0	0	0	0	57	31	29	45	31	0	1	41	0
0	0	0	0	0	0	F	72	25.78	0	104	5	0	0	66	114	65	6.9	234	4.058	3360.08	5.51	30	2.74	77	0	1	4	1	0	0	1	0	0	1	0	0	0	65	31	31	45	28	0	1	69	0
0	0	0	1	1	0	M	59	23.91	1	147	5	0	0	67	110	70	13.13	196	13.142	586.91	5.19	60	2.64	77	1	1	5	1	0	0	0	0	0	0	0	0	1	58	30	29	46	27	0	1	50	0
0	0	0	1	1	0	M	67	26.67	1	147	5	0	0	84	106	68	7.79	233	0.044	811.92	4.97	115	1.42	77	0	1	4	1	0	0	0	0	0	1	1	0	1	60	29	30	46	28	0	1	91	0
0	0	0	1	0	0	M	80	23.56	1	119	5	0	0	65	158	90	6.33	219	0.243	1293.53	7.06	20	2.79	77	0	1	4	1	1	1	0	0	1	0	0	0	0	66	34	32	46	31	0	0	85	0
0	0	0	1	1	0	M	51	28.28	0	126	5	0	0	86	107	68	5.39	246	3.833	1894.63	10.13	26	3.28	77	1	1	4	2	0	0	0	0	1	0	1	0	0	49	35	31	46	28	0	1	49	0
0	0	0	1	0	0	M	75	29.05	1	155	5	0	0	85	143	78	7.1	102	2.302	2079.38	5.92	46	3.63	77	0	1	4	1	1	1	0	0	0	2	0	0	0	67	34	34	46	29	0	1	59	1
1	0	0	0	0	0	M	78	26.45	1	128	5	1	0	70	120	80	6.82	230	1.666	862.27	5.2	19	2.66	77	0	1	4	1	0	1	0	0	0	0	0	1	0	58	35	35	47	33	0	1	79	0
0	0	0	1	1	0	M	45	20.76	1	163	5	0	0	68	130	70	15.98	218	16	249.94	4.86	87	2.42	77	1	1	4	1	0	0	0	0	0	0	0	0	1	62	26	30	48	32	0	0	98	0
1	0	0	0	1	0	M	27	25.62	1	167	5	0	0	69	120	70	10.81	535	0.001	312.21	4.66	115	1.55	77	1	1	4	1	0	0	0	0	1	0	0	0	0	54	33	30	49	29	0	0	77	0
1	0	0	0	0	0	M	48	24.38	1	121	3	1	0	54	96	64	8.53	213	16	890.58	4.5	33	6.55	77	1	1	4	4	0	0	0	0	1	0	1	0	0	52	34	35	49	33	0	1	54	0
0	0	0	1	1	0	M	72	27.14	0	136	5	0	0	62	107	66	13.02	203	2.373	2121.64	10.5	94	2.71	77	1	1	5	1	1	1	0	0	0	0	0	1	0	44	36	34	49	31	0	0	45	0
0	0	0	1	1	0	M	75	19.72	1	140	5	0	0	105	108	63	6.53	281	0.052	2638.76	4.86	45	3.27	77	0	1	4	2	0	0	0	0	1	0	0	0	0	54	33	30	49	29	0	0	22	1
0	0	0	1	0	0	M	81	20.93	0	128	5	0	0	76	140	70	6.59	255	1.365	2638.76	5.14	12	2.48	77	1	1	4	1	0	0	0	0	1	0	1	1	0	66	31	33	49	30	0	0	85	0
0	0	0	1	1	0	M	68	26.03	1	127	5	0	0	71	190	110	6.42	147	14.745	4963.61	7.87	19	3.09	77	0	1	4	1	1	1	0	0	1	0	0	0	0	54	33	30	49	29	0	1	63	0
1	0	0	0	0	1	M	80	21.38	0	135	4	0	0	58	150	78	7.47	99	1.847	12114.6	5.01	17	2.82	77	0	1	1	4	0	1	1	0	1	0	0	0	0	54	33	30	49	29	0	0	5	1
1	0	0	0	0	0	M	49	30.8	0	153	7	0	0	92	174	108	7.89	267	0.044	248.29	4.15	84	2.75	77	1	1	4	1	0	1	0	0	0	0	0	0	1	56	35	31	50	31	0	1	65	0
1	0	0	0	0	0	M	60	25.47	1	136	7	0	0	89	140	90	6.4	285	1.996	1711.72	4.22	17	2.07	77	0	1	4	1	0	1	0	0	1	0	1	0	1	64	36	32	52	27	0	1	56	0
0	0	0	1	1	0	M	67	26.37	1	136	3	0	0	75	142	88	16.78	195	16	3042.43	4.94	68	2.41	77	1	1	4	1	0	1	0	0	1	1	0	0	0	44	40	34	52	30	0	0	47	0
1	0	0	0	1	0	M	77	20.31	1	125	0	0	0	92	100	69	16.33	185	16	8476.43	5.65	45	1.5	77	0	1	5	3	0	0	0	0	2	0	1	1	0	30	34	30	52	28	0	1	75	0
0	1	1	1	0	0	F	76	26.67	0	101	5	0	0	70	160	80	9.71	161	1.956	15000	5.14	42	1.25	77	0	1	4	2	1	1	0	0	2	0	2	0	0	46	48	31	52	29	0	1
0	0	0	0	0	0	M	57	25.81	0	127	5	0	0	94	123	68	13.17	206	3.116	1430	4.7	45	2.52	77	1	1	4	1	0	0	0	0	1	0	0	0	1	57	39	29	54	29	0	1	67	0
0	0	0	1	1	0	M	62	22.49	1	143	5	0	0	79	106	64	8.43	132	16	2638.76	5.05	86	2.39	77	1	1	4	1	0	0	0	0	1	0	1	0	1	56	31	34	54	30	0	0	97	0
0	0	0	1	1	0	F	75	22.22	0	150	0	0	0	79	95	62	15.27	170	16	4205.97	6.23	83	2.12	77	0	1	4	3	0	0	1	0	0	0	2	0	0	46	33	32	54	27	0	1	85	0
1	0	0	0	1	0	M	66	28.03	0	114	7	0	0	93	182	96	8.93	174	5.257	2684.93	6.7	37	2.29	77	0	1	4	2	1	1	0	0	2	0	1	0	0	42	37	32	55	33	0	0	67	0
0	0	0	1	0	0	M	50	28.57	1	137	7	0	0	68	124	78	12.38	259	10.692	530.64	5.41	31	2.28	77	1	1	4	1	1	1	0	0	1	0	1	0	1	47	35	31	56	29	0	0	75	0
1	0	0	0	1	0	M	64	26.56	1	141	5	0	0	89	116	82	10.01	166	16	2593.33	6.7	88	1.84	77	1	1	4	2	1	0	0	0	0	1	0	0	0	52	34	31	56	29	0	1	98	0
1	0	0	0	0	0	F	62	25.89	0	132	5	0	0	66	148	80	7.6	203	0.229	1556.89	4.9	15	5.34	78	0	1	5	1	0	1	1	0	0	0	0	0	1	79	26	29	40	30	0	0	77	0
1	0	0	0	0	0	F	76	18.67	0	103	1	0	0	89	133	84	8.15	264	5.708	6377.09	6.7	19	2.52	78	1	1	4	3	1	1	1	0	2	0	0	0	0	51	32	27	40	25	0	0	47	0
1	0	0	0	0	0	M	83	20.36	1	130	3	0	0	67	118	60	6.39	200	0.2	455.89	3.54	13	1.46	78	1	1	4	1	0	0	0	0	1	0	0	1	1	68	30	27	41	27	0	0	54	0
1	0	0	0	0	0	M	56	20.96	1	129	0	0	0	58	76	64	11.76	221	0.084	163.64	5.75	13	3.37	78	0	1	4	1	0	1	0	0	1	0	1	0	0	61	30	27	43	27	0	0	97	0
0	0	0	1	0	0	M	56	23.44	1	140	5	0	0	88	112	68	10.23	288	16	2638.76	4.99	42	2.25	78	1	1	5	2	0	1	0	0	1	0	1	0	0	57	27	26	43	26	0	1	52	0
0	0	0	1	0	0	M	60	27.36	0	139	5	0	0	67	120	70	9.03	167	0.005	179.76	7.55	42	1.72	78	1	1	4	1	1	0	0	0	0	0	0	1	1	63	34	29	44	34	0	0	64	0
1	0	0	0	1	1	M	53	21.92	1	127	5	0	0	86	142	82	5.95	309	1.79	257.41	5.7	45	4.87	78	1	1	4	1	0	0	0	0	0	0	1	0	0	65	31	34	44	30	0	1	45	1
0	0	0	1	0	1	M	65	27.13	0	139	5	0	0	65	128	76	12.06	147	10.326	216.15	5.37	47	3.5	78	0	1	4	1	0	1	0	0	0	0	0	1	1	69	33	31	45	27	0	1	56	0
0	0	0	1	0	1	M	53	26.04	1	157	5	0	0	66	134	70	10.88	210	16	314.53	6.7	33	1.95	78	1	1	5	1	0	1	0	0	0	1	0	0	1	57	35	29	45	33	0	0	45	0
1	0	0	0	0	0	M	66	19.96	1	131	0	0	0	52	80	46	12.3	269	13.136	1625.96	5.76	50	2.94	78	1	1	4	2	0	0	0	0	0	0	0	0	0	50	28	31	45	32	0	1	89	0
0	0	0	1	0	0	M	67	22.21	1	144	5	0	0	52	152	90	5.89	139	9.238	372.32	5.5	43	3.24	78	1	1	4	1	0	0	0	0	0	0	0	0	1	65	31	32	47	29	0	0	76	0
1	0	0	0	0	0	F	67	24.44	1	126	7	0	0	77	140	71	10.29	145	7.409	1126.48	5.9	22	4.05	78	1	1	5	1	1	1	0	0	0	0	0	0	1	54	31	30	48	30	0	1	66	0
0	0	0	1	0	0	F	68	22.35	0	111	5	0	0	70	166	95	6.92	222	0.85	2638.76	2.9	20	3.41	78	0	1	4	1	1	1	1	0	0	1	0	0	0	32	34	34	48	30	0	0	18	1
0	0	0	1	0	0	M	42	25.61	1	141	5	0	0	76	118	71	7.41	306	0.11	622.22	8.32	8	1.05	78	1	1	4	1	1	0	0	0	1	0	0	0	0	54	33	30	49	29	0	0	47	0
0	0	0	0	1	0	M	64	22.75	0	147	5	0	0	88	114	70	11.56	175	12.056	1219.26	5.97	72	3.1	78	1	1	4	1	0	0	0	0	1	0	0	0	0	54	33	30	49	29	0	0	95	0
0	0	0	1	0	0	M	76	26.12	1	140	0	0	0	56	148	79	9.1	100	0.24	6220.22	4.88	14	2.17	78	0	1	4	1	0	1	0	0	1	0	0	0	0	54	33	30	49	29	0	0	3	1
0	0	0	1	1	0	M	59	17.4	1	120	5	0	0	74	132	69	11.24	315	16	1335.53	4.63	79	2.46	78	1	1	4	1	0	1	0	0	1	0	0	0	0	72	29	26	50	28	0	1	59	0
0	0	0	1	1	0	M	66	25.86	1	154	5	0	0	62	140	80	12.01	114	16	887.24	7.36	69	3.6	78	1	1	4	1	0	1	1	0	0	0	0	0	0	56	32	28	52	28	0	1	100	0
0	0	0	1	1	0	M	62	25.26	0	158	5	0	0	68	128	87	5.15	116	12.231	2676.38	4.69	30	1.29	78	1	1	5	1	0	0	0	0	1	0	1	0	0	38	33	33	53	31	0	0	55	0
0	0	0	1	0	1	M	70	25.95	0	102	3	0	0	60	97	58	8.47	160	16	346.36	8.08	46	2.69	78	1	1	7	1	0	0	0	0	1	0	1	0	0	50	38	33	56	32	0	1	69	0
0	0	0	1	1	0	M	52	27.76	0	137	1	0	0	72	152	81	10.14	172	16	1762.54	16.16	74	3.57	78	1	1	4	1	1	1	1	0	1	0	0	0	0	43	32	29	56	28	0	0	54	0
0	0	0	1	1	0	M	71	19.72	0	120	3	1	0	87	102	71	12.3	288	12.677	7755.98	5.85	33	2.79	78	0	1	4	1	1	0	0	0	3	1	2	1	0	48	40	30	59	30	0	1	82	0
0	0	0	1	0	0	F	87	22.03	0	123	5	0	0	85	140	80	8.75	121	6.052	1830.08	5.42	22	3.32	78	0	1	5	1	0	0	0	0	1	0	0	0	0	43	36	28	61	29	0	0	83	0
0	0	0	1	0	0	F	77	23.92	0	115	5	0	0	75	128	66	6.36	188	1.746	7445.99	4.92	10	2.41	78	0	1	7	2	0	0	0	0	3	3	1	1	0	46	38	32	61	34	0	0	15	1
0	0	0	1	0	0	M	73	19.48	0	140	5	0	0	63	139	85	7.48	231	0.653	920.14	3.96	15	1.51	79	0	1	5	1	0	0	0	0	0	0	0	0	1	55	27	24	41	25	0	0	47	0
1	0	0	0	1	0	M	72	20.66	1	151	5	0	0	66	126	76	6.31	263	0.356	3449.8	4.2	40	0.86	79	1	1	4	1	0	1	0	0	0	1	0	0	0	64	34	30	41	28	0	0
1	0	0	0	0	0	F	69	23.83	0	105	5	0	0	77	120	70	6.91	231	2.108	3883.59	6.27	18	3.42	79	1	1	4	1	1	1	0	0	0	0	1	0	1	53	32	31	41	32	0	1	65	0
0	1	0	1	0	0	M	53	23.11	1	159	5	0	0	65	121	71	9.45	236	4.694	236.92	5.71	36	2.89	79	1	1	5	1	0	1	0	0	0	0	0	0	0	57	29	32	43	32	0	0	80	0
0	0	0	1	0	1	M	44	23.39	0	153	4	0	0	85	147	68	9.41	172	0.136	70.18	9.19	76	3.12	79	0	1	5	1	1	0	0	0	2	0	0	0	0	54	33	35	44	31	0	0	48	0
0	0	0	1	0	0	F	59	28.3	0	106	0	0	0	91	94	66	9.62	292	5.048	4334.86	18.81	22	5.26	79	0	1	5	3	1	1	0	0	1	0	0	0	0	31	29	28	45	24	0	0	1	1
1	0	0	0	0	0	M	45	26.62	0	150	5	0	0	62	146	100	10.07	317	1.659	419.33	5.27	17	2.83	79	1	1	5	1	0	1	0	0	0	0	0	0	1	67	31	30	46	33	0	0	76	0
1	0	0	0	1	0	M	62	21.26	1	146	5	0	0	69	132	80	6.22	243	0.1	533.3	4.55	35	2.33	79	1	1	4	1	0	0	0	0	0	0	1	1	1	53	29	36	46	36	0	0	102	0
0	1	1	1	0	0	M	65	23.24	0	140	7	0	0	57	152	80	10.13	173	8.965	1164.82	6.6	21	2.17	79	1	1	4	1	1	1	0	0	0	0	0	0	1	75	30	30	46	30	0	1	63	1
0	0	0	1	1	0	M	49	26.15	1	128	6	0	0	76	150	96	8.23	163	0.017	409.11	10.85	31	1.87	79	1	1	5	1	1	1	1	0	1	0	0	0	0	68	37	30	48	27	0	1	61	0
0	0	0	1	0	0	M	48	24.86	0	164	5	0	0	94	122	92	13.23	169	16	2202.9	4.59	97	3.32	79	1	1	4	1	1	0	0	0	1	0	0	0	0	40	31	29	48	29	0	0	60	0
0	0	0	1	0	0	M	56	24.39	1	166	3	0	0	75	102	70	4.77	188	0.145	402.67	7.5	34	2.33	79	0	1	4	1	1	0	0	0	1	0	0	0	0	54	33	30	49	29	0	1	89	0
0	0	0	1	1	0	F	70	20.83	0	114	5	0	0	72	90	62	10.48	321	6.881	440.97	9.72	68	2.76	79	1	1	5	4	0	1	0	0	1	1	0	0	0	43	28	32	49	29	0	0	50	0
0	0	0	1	0	0	M	60	24.09	0	135	5	0	0	105	115	77	11.4	158	16	937.47	6.8	79	2.88	79	1	1	4	1	0	0	0	0	1	0	0	0	0	54	33	30	49	29	0	1	94	0
1	0	0	0	0	1	F	69	25.97	0	124	2	0	0	66	192	88	7.05	153	1.473	983.19	2.95	17	5.85	79	0	1	4	4	1	1	0	0	1	0	0	0	0	54	33	30	49	29	0	0	5	1
0	0	0	1	0	1	M	44	25.13	1	156	7	0	0	70	160	100	8.57	263	0.273	2638.76	5.06	81	2.58	79	0	1	4	1	1	1	0	0	1	0	0	0	0	54	33	30	49	29	0	0	85	0
0	0	0	1	0	0	M	71	25.71	1	91	7	1	0	68	140	84	5.44	161	7.873	3674.69	5.76	64	2.37	79	1	1	5	3	0	1	1	0	1	1	1	0	1	61	34	32	49	29	0	1	54	0
0	0	0	1	1	0	F	72	25.48	0	127	1	0	0	118	84	66	14.96	225	16	4479.67	13.13	101	2.82	79	1	1	5	4	1	0	1	0	1	0	0	0	0	54	33	30	49	29	0	0	2	1
0	0	0	1	0	1	M	72	22.6	1	136	5	0	0	80	123	78	9.99	253	16	496.64	5.55	42	3.8	79	1	1	4	1	0	0	0	0	1	0	1	0	0	51	37	32	50	32	0	1	66	0
1	0	0	0	0	0	M	57	24.8	1	156	5	0	0	80	165	84	13.36	223	16	676.52	11.58	43	2.65	79	1	1	4	2	1	0	0	0	1	1	0	0	0	54	38	34	50	30	0	1	54	0
1	0	0	0	1	0	M	62	28.34	0	144	7	0	0	98	158	69	10.73	278	3.953	1387.57	6.86	26	2.59	79	1	1	5	1	0	1	0	0	0	0	0	0	1	77	31	29	50	28	0	0	69	0
0	0	0	1	0	0	M	63	22.48	1	130	5	0	0	72	120	68	15.12	316	12.725	1395.61	6.25	37	2.5	79	0	1	4	2	0	1	0	0	1	2	0	0	0	60	34	30	50	33	0	1	76	0
0	0	0	1	1	0	M	35	28.09	1	168	5	0	0	88	134	78	14.36	221	16	2909.9	5.4	110	2.84	79	1	1	4	1	1	0	0	0	1	0	0	0	0	51	33	35	50	30	0	1	93	0
1	0	0	0	0	0	M	59	21.51	1	151	5	0	0	58	127	87	8	152	16	228.96	4.49	60	3.4	79	1	1	4	1	0	0	0	0	1	1	0	1	0	57	31	30	51	30	0	0	60	0
0	0	0	1	0	0	M	53	31.24	1	141	5	0	0	86	110	60	11.57	196	12.443	983.34	11.4	37	1.87	79	1	1	4	1	1	1	0	0	1	0	0	0	1	58	37	29	51	31	0	1	48	0
1	0	0	0	0	0	M	64	22.23	1	118	0	1	0	80	100	50	9.5	244	1.333	184.95	5.14	29	3.54	79	1	1	4	2	0	1	0	0	1	0	0	1	1	58	33	29	52	31	0	1	64	0
1	0	0	0	0	0	M	64	25.06	0	117	5	0	0	78	105	71	12.35	183	9	2781.75	9.3	52	1.89	79	1	1	5	2	1	0	0	0	0	0	0	0	0	40	29	31	53	30	0	1	47	0
1	0	0	0	0	0	M	67	23.31	1	156	5	0	0	58	124	70	17.36	184	16	189.58	6.71	73	2.1	79	1	1	4	1	0	1	0	0	0	0	0	0	1	63	32	32	54	33	0	0	88	0
0	0	0	0	0	0	M	65	21.3	1	122	5	1	0	75	119	82	8.51	145	16	3297.16	6.23	31	2.33	79	1	1	4	1	0	1	0	0	0	0	1	0	1	59	36	33	57	27	0	1	44	0
1	0	0	0	0	0	M	64	26.03	1	112	5	1	0	72	130	66	7.66	170	3.303	2638.76	5.11	13	1.47	80	1	1	4	1	1	1	0	0	0	0	0	0	1	69	37	25	37	27	0	1	103	0
1	0	0	0	0	0	F	84	17.51	0	93	5	0	0	70	138	75	7.07	206	0.169	1390.63	4.48	6	1.73	80	0	1	5	1	0	1	1	0	0	0	1	0	1	72	35	28	39	24	0	0	46	0
0	0	0	1	0	0	F	66	18.47	1	89	5	0	0	60	124	76	7.01	257	0.425	5717.98	4.29	152	1.87	80	1	1	5	1	1	1	0	0	1	0	1	0	1	62	31	23	41	23	0	0	51	0
1	0	0	0	0	0	M	77	29.41	1	89	5	1	0	81	122	60	4.76	227	1.027	1692.41	5.45	22	1.72	80	1	1	4	1	0	1	0	0	1	0	1	0	1	62	30	32	42	34	0	1	46	0
0	0	0	0	0	0	M	70	26.3	1	108	0	0	0	65	96	78	8.53	103	16	2027.42	6.34	73	1.63	80	0	1	4	2	0	0	0	0	1	0	3	0	1	65	27	46	42	36	0	1	83	0
0	0	0	1	0	0	F	83	22.48	0	88	0	0	0	71	128	76	3.45	157	0.343	2697.35	4.04	10	1.99	80	0	1	4	1	0	0	0	0	1	1	1	0	0	57	29	26	42	24	0	1	62	0
0	0	0	1	1	0	M	49	25.71	1	153	5	0	0	82	146	92	10.02	168	16	379.23	5.79	47	2.64	80	1	1	4	1	0	0	0	0	1	0	0	0	0	59	34	28	43	30	0	0	97	0
0	0	0	1	0	0	M	69	27.89	1	144	1	0	0	72	140	90	7.3	195	0.001	133.76	4.65	48	1.9	80	1	1	4	2	0	1	0	0	1	0	1	0	1	65	28	28	44	31	0	0	54	0
1	0	0	0	0	0	M	49	25.78	1	143	5	0	0	70	120	75	5.11	277	0.001	340.37	5.5	45	2.52	80	0	1	4	1	1	0	0	0	0	0	1	0	1	61	31	28	44	30	0	0	70	0
1	0	0	0	1	0	M	45	26.86	1	148	5	0	0	67	124	82	7.91	305	3.987	2638.76	12.82	56	2.49	80	1	1	4	1	1	0	0	0	0	0	0	0	1	65	26	32	44	33	0	0	81	0
1	0	0	0	0	0	M	66	24.8	1	142	0	0	0	54	136	77	10.92	198	11.188	463.61	6.66	20	2.95	80	1	1	5	1	0	1	0	0	0	1	1	1	1	71	32	28	45	33	0	0	73	0
0	0	0	1	0	0	M	53	25.35	1	153	3	0	0	118	114	68	12.08	236	16	1369.86	8.09	105	3.16	80	1	1	7	3	0	1	0	0	1	0	0	0	0	34	35	28	45	27	0	1	54	0
1	0	0	0	1	0	M	35	27.03	1	160	5	0	0	74	120	90	5.17	241	0.05	506.67	5.22	69	2.25	80	0	1	4	1	0	0	0	0	0	0	0	0	0	69	35	25	46	23	0	0	45	0
1	0	0	0	0	0	M	75	20.96	1	110	0	1	0	90	96	62	8.91	157	2.305	1696.3	8.22	69	3.49	80	0	1	5	2	0	1	0	0	1	0	1	0	0	42	30	26	46	27	0	1	51	0
0	0	0	1	0	1	M	48	25.95	1	149	5	0	0	70	117	79	13.37	253	0.666	10.86	5.51	45	5.27	80	1	1	5	1	0	0	0	0	1	0	0	0	1	64	32	29	47	30	0	1	70	0
0	0	0	1	1	0	M	69	26.04	1	139	5	0	0	102	147	87	7.62	149	8.009	1065.52	9.68	49	3.4	80	0	1	4	1	1	1	0	0	1	0	0	0	0	54	33	30	49	29	0	0	69	0
0	0	0	0	0	0	M	69	29.3	0	137	5	0	0	70	110	86	6.9	235	1.297	1432.83	6.44	18	1.74	80	0	1	5	1	1	1	0	0	1	0	0	0	0	54	33	30	49	29	0	1	36	1
0	0	0	1	0	0	F	78	23.83	0	112	5	0	0	71	148	98	7.62	196	1.761	2726.22	4.56	68	1.69	80	0	1	4	1	0	1	0	0	1	0	0	1	1	72	31	27	49	25	0	1	65	0
0	0	0	1	1	1	M	74	18.16	0	123	5	0	0	54	128	74	8.4	128	16	4222.11	1.57	49	2.74	80	0	1	4	2	0	1	1	0	2	0	3	1	1	53	36	37	50	35	0	0	97	0
0	0	0	1	0	0	M	67	26.35	0	134	5	0	0	90	139	87	7.54	170	2.595	105.36	10.16	19	2.59	80	0	1	5	1	1	0	0	0	0	0	1	1	0	73	35	32	52	28	0	0	80	0
1	0	0	0	0	0	M	57	17.97	1	172	5	0	0	76	114	62	12.28	207	2.957	92.2	6.7	33	3.03	80	1	1	4	2	1	1	0	0	0	0	0	0	0	59	32	30	55	27	0	0	94	0
0	0	0	1	0	0	F	69	24.44	0	118	0	0	0	89	118	84	10.17	146	0.752	13700	6	13	3.02	80	0	1	4	2	0	1	0	0	2	0	1	0	0	31	38	28	56	26	0	0	2	1
0	0	0	1	0	0	F	65	21.48	0	140	5	0	0	80	172	94	8.61	178	0.661	733.88	5.84	26	3.2	81	1	1	5	1	1	1	0	0	1	0	0	0	1	62	29	26	42	25	0	1	53	0
1	0	0	0	1	0	M	66	25.77	0	155	5	0	0	91	150	84	10.68	169	9.421	322.25	6.36	35	3.08	81	1	1	5	1	0	1	0	0	0	0	0	0	1	59	31	28	45	23	0	0	71	0
1	0	0	0	0	0	F	76	20.55	1	123	5	0	0	62	155	68	5.42	143	5.892	584.99	4.61	25	2.37	81	1	1	4	1	0	1	0	0	0	1	1	1	1	64	31	32	45	30	0	1	44	0
1	0	0	0	0	0	M	50	26.56	0	147	5	0	0	74	122	68	13.17	179	8.892	773.46	4.57	24	1.73	81	1	1	4	1	0	0	0	0	0	0	0	0	1	67	33	30	47	26	0	0	100	0
0	0	0	1	1	0	M	53	23.44	1	143	5	0	0	76	121	74	15.21	257	11.064	3728.91	6.64	48	1.98	81	1	1	7	1	0	0	0	0	1	0	1	0	0	48	35	30	47	30	0	0	65	0
1	0	0	0	0	1	F	69	23.07	0	97	1	0	0	99	124	63	5.44	88	1.497	6394.44	8.1	155	1.73	81	0	1	4	1	1	1	0	0	1	0	0	0	0	36	33	26	47	26	0	0	61	0
1	1	1	0	1	0	M	71	24.61	0	137	5	0	0	75	132	90	9.02	115	16	2554.91	5.56	39	3.6	81	1	1	4	1	0	0	0	0	0	0	0	0	0	44	29	29	48	28	0	0	90	0
0	0	0	1	1	0	M	66	26.3	0	163	3	0	0	80	120	80	11.24	194	16	294.95	8.2	102	2.96	81	1	1	4	1	0	0	0	1	1	0	0	0	0	54	33	30	49	29	0	1	1	1
0	0	0	1	1	0	M	50	33.22	1	155	5	0	0	72	101	60	11.63	213	16	699.76	7.75	52	2.2	81	0	1	4	1	0	0	0	0	1	0	0	0	0	54	33	30	49	29	0	0	99	0
1	0	0	0	0	0	M	66	27.04	1	135	5	0	0	83	140	80	8.03	120	1.861	1614.32	6.4	20	1.08	81	0	1	4	1	0	1	0	0	1	0	0	0	0	54	33	30	49	29	0	0	84	0
0	0	0	0	0	0	M	65	25.04	1	129	1	0	0	49	142	84	8.02	180	4.245	1864.08	4.29	19	2.17	81	1	1	4	1	0	0	0	0	0	1	0	0	1	56	33	29	49	31	0	1	67	0
0	0	0	1	1	0	F	50	18.55	0	98	5	0	0	73	122	82	4.95	133	16	2378.65	6.06	33	3.1	81	0	1	3	1	0	0	0	0	1	0	0	0	0	54	33	30	49	29	0	0	76	0
1	0	0	0	0	0	M	87	24.03	1	134	1	0	0	60	144	60	8.3	195	16	2638.76	5.16	19	3.63	81	0	1	4	1	0	0	0	0	0	0	0	0	1	54	33	30	49	29	0	0	81	0
0	0	0	1	0	1	M	42	30.19	1	163	5	0	0	85	136	71	8.25	207	5.096	138.1	5.55	36	1.2	81	1	1	4	1	0	0	0	0	0	0	0	0	0	66	33	29	50	30	0	0	99	0
0	0	0	1	1	0	M	63	25.82	1	135	3	0	0	72	148	82	11.17	200	2.265	423.98	5.88	50	2.54	81	1	1	5	1	0	1	0	0	0	0	0	0	0	53	30	30	50	28	0	0	50	0
1	0	0	0	0	0	F	73	26.8	0	98	1	0	0	59	141	66	6.87	271	1.831	5918.14	5.28	22	1.19	81	0	1	4	1	1	1	1	0	1	0	0	1	1	64	33	34	50	31	0	1	54	0
0	0	0	1	1	1	M	50	23.94	1	144	1	0	0	66	127	81	12.46	239	8.22	187.88	6.36	58	2.72	81	1	1	4	1	0	0	0	0	1	0	0	0	0	45	34	33	52	30	0	0	57	0
0	0	0	1	1	0	M	50	18.53	1	131	3	0	0	62	96	52	9.94	187	16	924.55	4.99	46	1.78	81	1	1	5	1	0	0	0	0	1	0	1	0	0	45	32	30	52	29	0	0	74	0
1	0	0	0	0	0	F	73	16.44	1	122	7	0	0	65	190	90	8.36	152	1.152	2354.53	5.82	39	1.22	81	0	1	4	2	0	1	1	0	2	2	1	0	0	55	46	25	53	24	0	0	42	1
0	0	0	1	1	0	M	31	32.41	1	159	5	0	0	98	146	90	14.31	281	8.336	229.56	11.78	143	2.77	81	1	1	5	1	1	0	0	0	0	1	1	0	0	44	36	29	55	31	0	0	50	0
0	0	0	1	0	0	M	67	24.61	1	130	5	0	0	96	116	70	9.51	284	14.363	5255.15	5.23	22	2.93	81	0	1	4	2	0	1	0	0	1	0	1	0	0	41	36	31	57	26	0	1	47	1
1	0	0	0	0	0	M	75	29.14	0	113	1	0	0	70	119	82	8.48	126	4.25	2345.99	6.15	43	1.87	81	1	1	5	1	0	1	1	0	1	0	1	0	1	56	37	31	58	33	0	0	60	0
0	0	0	1	0	0	M	79	22.04	0	131	5	0	0	67	158	70	6.65	180	0.001	758.82	5.15	18	2.98	81	0	1	4	1	0	1	0	0	0	3	0	0	1	54	32	32	59	34	0	0	102	0
1	0	0	0	0	0	M	60	26.86	1	126	5	0	0	73	130	80	9.84	204	0.361	2221.97	8.12	21	3.28	81	1	1	4	1	1	1	0	0	0	0	0	0	0	46	35	33	59	30	0	1	80	0
0	0	0	1	0	0	M	60	23.13	1	149	3	0	0	78	128	76	7.47	351	1.847	2441.58	4.98	50	1.6	81	0	1	4	1	1	0	0	0	3	0	1	0	0	44	36	37	59	32	0	1	48	1
0	0	0	1	0	0	F	66	24.97	0	133	3	0	0	66	120	83	8.18	203	3.85	1823.49	5.03	17	2.11	82	1	1	4	1	0	0	0	0	0	0	1	1	1	66	25	26	40	25	0	0	48	0
0	0	1	1	0	0	M	50	24.31	0	118	3	0	0	79	131	77	9.47	122	14.957	2284.05	5.34	50	2.04	82	0	1	4	1	0	0	0	0	2	2	1	0	0	55	35	31	43	29	0	0	78	0
0	0	0	1	1	0	F	75	20.03	0	116	5	0	0	85	140	67	7.79	331	0.583	4015.58	6.35	26	2.52	82	0	1	4	2	0	1	0	0	0	1	0	0	1	61	30	25	44	22	0	0	71	0
0	0	0	1	0	0	M	56	26.76	0	145	5	0	0	80	150	84	8.71	186	0.969	490.29	5.1	45	2.52	82	1	1	4	1	1	0	0	0	0	0	0	0	1	51	24	27	45	26	0	0	45	0
0	0	0	1	0	0	M	75	22.04	0	125	5	0	0	81	148	106	8.31	148	6.658	2014.53	4.77	7	2.25	82	1	1	4	1	0	0	1	0	1	1	1	1	0	50	36	30	46	31	0	0	60	0
0	0	0	1	0	1	M	43	27.34	0	144	5	0	0	73	134	90	6.58	212	1.11	97.84	4.89	57	1.96	82	0	1	1	1	0	0	0	0	1	0	0	0	0	72	32	33	47	33	0	0	73	0
0	0	0	1	0	0	M	47	24.8	1	168	5	0	0	86	144	90	11.88	188	16	296.23	6.78	106	2	82	1	1	4	1	1	1	0	0	0	0	0	0	1	63	28	29	47	27	0	0	96	0
1	0	0	0	0	0	M	85	22.39	1	134	5	0	0	54	120	70	5.61	196	1.674	609.78	3.88	23	2.35	82	0	1	4	1	0	0	0	0	1	1	1	0	0	62	35	35	47	26	0	0	60	0
1	0	0	0	0	1	M	62	25.78	0	130	5	0	0	56	146	82	9.48	212	4.79	1290.18	5.32	38	2.51	82	1	1	4	1	0	1	1	0	0	1	0	0	1	67	29	32	48	28	0	1	71	1
0	0	0	1	1	0	M	66	27.43	1	130	7	0	0	70	142	84	14.05	249	1.101	2781.77	6.15	23	2.86	82	1	1	4	1	1	1	0	0	1	1	1	1	0	51	33	29	48	33	0	0	60	0
1	0	0	0	1	0	M	50	30.86	1	150	5	0	0	86	168	97	15.63	142	7.989	1340.08	5.97	47	2.74	82	1	1	4	1	1	1	0	0	1	1	0	0	0	48	31	30	49	27	0	0	50	0
1	0	0	0	0	0	M	73	23.94	0	126	0	0	0	66	170	79	5.2	131	0.036	1721.22	4.43	61	2.6	82	0	1	4	4	0	1	1	0	1	0	0	0	0	54	33	30	49	29	0	0	1	1
0	0	0	1	0	0	F	66	23.42	0	129	5	0	0	83	143	94	10.22	227	15.215	7549.71	7.17	25	1.5	82	1	1	4	1	0	1	0	0	1	0	0	0	0	54	33	30	49	29	0	0	54	0
1	0	0	0	0	0	F	79	22.22	0	82	5	0	0	80	134	80	7.2	196	1.876	8742.75	4.07	7	2.5	82	0	1	2	1	1	1	1	0	1	0	0	0	0	54	33	30	49	29	0	0	12	1
0	0	0	1	0	0	M	63	25.64	0	139	1	0	0	66	150	78	3.61	107	1.618	680.55	8.37	25	2.11	82	1	1	5	1	1	1	0	0	1	1	1	1	1	68	33	28	52	27	0	1	62	0
0	0	0	1	1	0	F	42	24.39	0	129	0	0	0	80	130	80	4.76	145	0.001	2729.71	4.38	20	2.26	82	1	1	4	1	0	0	0	0	1	0	1	1	0	43	30	29	53	30	0	0	55	0
0	0	0	0	0	0	M	79	20.52	1	120	3	0	0	104	122	86	7.89	276	1.952	9726.02	5.59	17	2.07	82	0	1	0	4	0	0	0	0	1	1	2	1	0	44	37	33	53	34	0	0	1	1
1	0	0	0	1	0	M	68	22.04	1	127	5	0	0	60	128	76	10.93	191	16	2785.71	5.52	49	2.95	82	1	1	4	1	0	0	0	0	2	1	1	1	0	53	39	33	54	27	0	0	46	0
1	0	0	0	0	0	F	78	23.81	0	126	5	0	0	122	131	75	3.94	146	0.317	15000	4.98	30	2.74	82	0	1	4	3	0	0	0	0	1	1	0	0	0	36	38	30	56	28	0	0	59	0
0	0	0	1	1	0	M	58	32.85	1	151	3	0	0	96	86	68	11.27	223	6.306	1906.94	9.93	40	1.55	82	1	1	5	1	1	1	1	0	0	0	0	0	0	45	33	26	58	30	0	0	75	0
1	0	0	0	0	0	M	77	23.15	1	121	3	1	0	64	93	56	7.5	167	14.476	2425.39	3.96	6	1.63	83	0	1	5	1	1	0	0	0	1	0	1	0	1	61	30	23	36	25	0	1	58	0
0	0	0	1	0	0	M	41	23.23	1	150	5	0	0	74	130	110	6.14	217	0.079	2638.76	4.67	53	1.62	83	0	1	4	1	0	1	0	0	0	0	0	0	0	58	25	29	39	33	0	0	75	0
0	0	0	1	0	1	F	57	30.04	1	121	7	0	0	98	124	76	9.63	184	16	256.57	6.73	53	2.82	83	1	1	5	1	0	1	0	0	1	0	0	0	1	82	33	28	40	29	0	0	71	0
0	0	0	1	0	1	M	41	24.77	0	136	5	0	0	52	107	70	13.66	224	4.984	973.81	8.74	69	1.9	83	1	1	5	4	0	0	0	1	1	1	1	0	0	47	32	26	41	30	0	0	49	0
0	0	0	1	0	0	M	69	23.42	1	130	4	0	0	55	162	84	11.64	167	0.91	501.47	9.07	45	2.21	83	1	1	4	1	0	0	0	0	1	1	1	0	1	64	35	38	43	35	0	0	101	0
0	0	0	1	0	0	F	69	29.24	0	128	6	0	0	70	120	80	6.7	270	0.006	2638.76	7.39	13	3.98	83	1	1	4	1	1	1	0	0	1	0	1	0	1	74	36	32	44	29	0	1	66	0
1	0	0	0	0	0	F	66	25.81	1	122	5	0	0	86	155	90	16.04	292	16	4837.31	9.7	45	1.77	83	1	1	5	3	1	1	0	0	1	0	1	0	1	60	27	28	44	28	0	1	19	1
0	0	0	1	0	0	M	74	20.2	1	127	7	0	0	89	138	90	9.2	156	16	1246.8	6.39	33	2.25	83	0	1	4	1	0	0	0	0	1	0	2	0	1	50	27	32	45	28	0	0	33	1
1	0	0	0	0	0	M	39	22.86	1	149	5	0	0	82	100	70	12.75	230	3.81	1967.3	5.57	53	2.52	83	1	1	4	1	0	0	0	0	1	0	0	0	0	50	26	33	45	31	0	0	60	0
0	0	0	1	0	0	M	67	26.63	1	137	5	0	0	68	116	60	8.59	207	13.693	2450.36	4.51	39	2.7	83	1	1	5	1	0	0	0	0	0	0	1	0	1	75	29	28	45	29	0	0	54	0
1	0	0	0	0	0	M	52	28.36	0	155	7	0	0	60	164	112	4.68	314	0.293	266.16	6.79	30	2.52	83	1	1	4	1	1	1	0	0	1	0	0	0	1	67	27	25	46	28	0	0	45	0
1	0	0	0	0	0	M	53	23.45	1	135	1	0	0	52	120	70	5.59	261	7.1	2638.76	4.27	89	2.56	83	0	1	4	1	0	0	0	0	0	0	0	0	1	71	30	30	46	31	0	0	86	0
0	0	0	1	0	0	F	64	20.44	1	114	5	0	0	88	128	80	10.76	98	16	3773.81	5.85	40	1.69	83	1	1	4	3	0	1	0	0	0	0	2	0	0	53	40	32	46	31	0	0	91	0
1	0	0	0	0	0	M	47	23.58	0	140	1	0	0	50	110	80	12.88	246	16	1055.1	5.21	27	2.76	83	0	1	4	1	0	1	0	0	0	0	0	0	0	71	31	31	47	30	0	0	83	0
1	0	0	0	1	0	M	63	23.41	1	107	5	0	0	83	120	90	5.71	213	8.445	1430	7.24	48	3.04	83	1	1	4	1	1	1	0	0	1	1	1	1	0	53	35	31	47	30	0	0	56	0
1	0	0	0	0	1	M	41	22.15	1	152	5	0	0	76	120	80	8.5	229	0.082	359.76	5.42	72	1.5	83	0	1	4	1	0	0	0	0	0	0	0	0	0	50	25	29	48	29	0	0	76	0
0	0	0	1	0	1	M	64	17.97	1	114	5	1	0	72	148	72	7.1	113	16	572.31	7.16	47	1.42	83	0	1	5	1	0	0	0	0	2	0	1	0	1	55	23	32	48	30	0	1	76	0
1	0	0	0	0	0	F	79	21.76	0	141	6	0	0	57	110	83	5.61	144	0.001	330.88	7.92	16	0.56	83	1	1	4	3	1	1	1	0	1	0	0	0	0	54	33	30	49	29	0	0	56	0
1	0	0	0	1	0	M	39	26.45	1	155	5	0	0	55	120	72	6.41	293	3.288	759.59	5.22	37	1.84	83	1	1	5	1	0	0	0	0	1	0	0	0	0	54	33	30	49	29	0	0	72	0
0	0	0	1	1	0	M	74	26.17	0	135	5	0	0	105	161	67	6.44	210	2.373	3517.29	5.58	29	2.23	83	0	1	5	2	0	1	0	0	1	0	0	0	0	54	33	30	49	29	0	0	48	0
1	0	0	0	0	0	M	77	14.88	1	105	0	0	0	59	105	50	5.29	102	0.486	7095.68	4.73	17	1.21	83	1	1	5	2	0	0	0	0	1	0	0	0	0	54	33	30	49	29	0	1	55	0
0	0	0	1	0	0	F	71	26.67	0	111	5	0	0	58	160	80	8.1	187	0.34	2243.15	4.21	22	2.2	83	1	1	4	1	0	1	0	0	1	0	1	0	1	71	33	28	50	28	0	0	52	0
0	0	0	1	0	0	F	83	20.69	0	91	3	0	0	73	118	66	11.03	145	16	8718.92	8.89	29	1.69	83	0	1	4	2	1	1	0	0	3	1	2	0	0	44	37	30	50	22	0	0	60	0
1	0	0	0	0	0	M	58	27.64	1	165	5	0	0	74	90	58	12.83	146	5.55	570.12	5.05	33	2.65	83	1	1	4	1	0	0	0	0	0	0	0	0	0	62	24	26	51	29	0	0	74	0
0	0	0	1	0	0	M	36	24.61	0	116	7	0	0	73	142	96	5.42	192	6.485	765.04	3.57	16	1.94	83	1	1	4	1	0	1	0	0	1	1	1	0	0	72	29	28	51	27	0	0	60	0
0	0	0	1	1	0	M	59	23.94	1	111	5	0	0	66	80	50	9.71	310	16	884.6	4.54	33	3.02	83	1	1	5	1	0	1	1	0	0	0	0	0	0	52	36	30	51	28	0	0	47	0
0	0	0	0	0	0	M	58	27.94	0	149	5	0	0	63	142	90	12.05	201	5.014	2638.76	8.57	34	2.37	83	1	0	4	1	1	1	0	0	1	0	1	0	1	58	35	30	51	31	0	0	66	0
0	0	0	1	0	1	M	50	25.14	1	173	5	0	0	60	90	60	19.58	243	16	175.53	4.88	76	2.21	83	1	1	4	1	0	0	0	0	0	1	0	0	1	61	33	28	52	26	0	0	63	0
0	0	0	1	0	0	M	62	25.65	1	135	5	0	0	58	120	70	5.2	224	10.318	1006.4	5.87	21	1.61	83	1	1	4	1	1	0	0	0	2	1	1	1	0	64	34	33	52	34	0	0	59	0
0	0	0	1	0	0	F	66	17.85	1	127	3	0	0	92	100	58	4.72	297	0.118	11284.5	3.67	12	2.76	83	0	1	4	1	0	0	0	0	2	1	1	0	0	35	31	26	54	27	0	1	16	1
1	0	0	0	0	0	M	60	24.38	0	158	3	0	0	80	103	71	8.15	475	0.669	1749.79	6.92	38	1.56	83	0	1	4	1	1	0	1	0	1	0	0	0	0	49	42	30	58	27	0	0	25	1
0	0	0	1	0	1	M	80	23.91	1	111	3	0	0	60	80	60	12.56	145	10.138	1154.07	4.85	61	1.6	83	1	1	7	4	1	1	1	0	0	1	0	0	0	49	35	33	61	28	0	1	21	1
0	0	0	1	0	0	M	65	19.81	1	114	3	0	0	55	90	56	10.31	210	16	288.16	9.78	40	1.61	84	1	1	5	1	0	0	0	0	0	0	1	0	0	31	29	40	36	26	0	1	63	0
0	0	0	1	0	0	M	39	28.31	0	143	3	0	0	78	98	62	8.91	207	6.811	1150.63	4.51	26	2.65	84	1	1	4	1	0	0	0	0	0	0	1	0	1	60	34	33	43	30	0	0	51	0
1	0	0	0	0	0	F	76	24.78	0	113	5	0	0	78	113	72	5.17	123	1.821	2628.71	5.93	17	2.05	84	0	1	5	1	0	1	0	0	1	1	1	0	0	53	34	26	44	24	0	1	55	0
1	0	0	0	0	0	F	75	22.26	0	130	5	0	0	79	177	78	9.48	212	0.001	1042.78	6.02	45	2.81	84	0	1	5	1	0	1	1	0	1	0	1	0	1	55	31	32	45	31	0	0	44	0
1	0	0	0	0	0	F	52	20.4	1	137	5	0	0	86	149	88	6.42	273	0.287	620.11	6.8	34	2.05	84	1	1	4	1	0	1	1	0	0	0	1	0	1	70	27	25	46	25	0	1	44	0
0	0	0	0	1	0	M	79	25.01	0	134	7	0	0	86	138	74	12.11	146	14.117	1048.36	8.63	54	2.92	84	0	1	5	1	1	1	0	0	1	1	0	0	0	43	33	28	46	28	0	0	68	0
1	0	0	0	0	0	M	68	25.71	1	126	5	0	0	56	120	80	6.57	155	2.582	324.61	5.77	24	4.41	84	0	1	5	1	0	1	0	0	0	1	0	1	0	61	28	28	47	28	0	0	80	0
0	0	0	1	0	0	M	46	21.36	0	142	3	0	0	81	110	60	5.77	266	0.149	4003.91	5.1	121	2.09	84	1	1	7	2	0	0	0	0	1	0	1	0	1	57	31	32	47	33	0	1	58	0
0	0	0	1	0	0	M	56	31.8	0	132	7	0	0	70	140	80	4.86	169	0.043	245.43	5.43	26	1.81	84	1	1	4	1	0	1	0	0	1	0	1	1	1	62	33	33	48	28	0	0	86	0
0	0	0	1	1	0	M	50	29.22	1	164	1	0	0	60	130	70	7.89	258	10.221	314.64	6.7	37	1.92	84	1	1	4	1	0	0	0	0	2	0	0	1	1	68	34	32	48	31	0	0	47	0
0	0	0	0	1	1	F	66	21.78	0	120	5	0	0	69	143	86	12.6	208	5.527	351.58	6.29	9	2.4	84	1	1	4	1	0	1	0	0	0	0	0	0	0	43	29	27	48	25	0	0	46	0
0	0	0	1	0	1	M	53	21.26	0	131	5	0	0	65	110	80	7.57	142	16	1158.52	5.48	121	1.65	84	1	1	5	1	0	0	0	0	1	0	1	0	1	55	30	37	49	34	0	1	52	0
0	0	0	1	0	0	M	59	23.88	1	124	3	0	0	62	102	72	7.6	228	11.218	1424.1	5.44	41	1.75	84	0	1	4	2	0	1	0	0	1	0	0	0	0	50	32	34	49	34	0	1	22	1
1	0	0	0	0	0	M	68	23.05	0	149	3	0	0	53	88	52	15.7	172	16	1939.78	13.42	75	2.7	84	1	1	4	2	1	0	0	0	2	1	1	0	0	46	33	32	49	29	0	1	42	0
1	0	0	0	0	0	F	73	23.94	1	69	5	0	0	88	101	53	14.06	181	2.755	5029.35	5.81	22	3.18	84	0	1	2	2	1	1	0	0	2	1	0	0	0	63	33	28	49	27	0	0	80	0
1	0	0	0	0	0	M	54	25.95	1	135	5	0	0	72	115	74	7.6	152	16	391.54	4.92	19	3.02	84	1	1	4	1	0	0	0	0	1	0	0	0	0	65	35	28	50	29	0	0	77	0
0	0	0	1	0	0	M	70	29.48	0	154	5	0	0	95	160	90	9.39	260	2.296	1455.58	7.47	48	3.31	84	0	1	5	1	1	1	0	0	0	1	0	0	0	51	39	32	50	31	0	0	66	0
0	0	0	1	1	0	M	65	22.04	1	127	3	0	0	86	108	66	11.73	179	16	1626.34	12.39	51	3.65	84	0	1	4	1	0	0	0	0	1	0	1	0	0	52	31	34	50	27	0	0	91	0
0	0	0	1	0	0	M	64	24.81	1	136	3	1	0	59	110	68	6.32	167	0.562	1113.27	5.95	14	0.88	84	1	1	4	1	1	0	0	0	1	0	0	0	1	67	39	27	51	26	1	1	54	0
1	0	0	0	1	0	M	40	22.77	1	129	5	0	0	55	110	72	6.76	240	1.919	2638.76	4.55	110	3.83	84	1	1	4	1	1	1	0	0	0	0	0	1	0	58	23	29	51	28	0	0	85	0
0	0	0	1	0	0	M	36	34.96	1	154	1	0	0	58	130	100	8.46	231	1.405	615.4	4.76	73	2.12	84	1	1	4	1	0	0	0	0	0	0	0	0	1	55	36	31	52	33	0	0	53	0
1	0	0	0	0	0	M	53	24.91	1	140	5	0	0	84	173	101	9.67	179	2.795	368.02	4.67	54	3.23	84	1	1	4	1	1	1	0	0	1	0	1	0	0	59	36	33	53	30	0	0	48	0
0	0	0	1	1	0	M	52	28.08	0	146	5	0	0	60	108	74	4.18	206	0.495	865.38	11.31	19	2.67	84	0	1	4	1	1	0	0	0	1	0	0	0	1	58	29	27	54	26	0	0	54	0
1	0	0	0	1	0	M	69	27.7	0	154	7	1	0	79	170	96	6.42	169	0.047	1704.11	6.7	9	3.09	84	1	1	5	1	1	1	0	0	1	1	0	0	0	50	40	32	57	30	0	0	74	0
0	0	0	1	1	1	F	73	29.38	0	124	5	0	0	78	91	50	14.8	169	2.125	3984.82	10.52	36	2.95	84	1	1	5	4	1	0	0	0	3	1	0	0	0	46	41	33	58	26	0	0	24	1
1	0	0	0	0	0	M	55	25.43	1	127	5	0	0	71	135	78	9.95	206	16	2040.58	6.81	74	2.83	84	1	1	5	1	0	1	1	0	2	0	0	0	0	43	41	35	59	32	0	1	45	1
0	1	0	1	1	0	M	65	25.95	1	158	5	0	0	98	120	80	14.75	208	6.62	177.67	4.41	19	2.37	85	0	1	5	1	0	0	0	0	0	0	0	1	1	75	31	29	41	30	0	0	80	0
0	0	0	1	0	0	M	57	29.75	0	145	7	0	0	85	140	90	10.11	357	1.713	314.58	6.97	30	3.55	85	1	1	4	1	1	1	0	0	0	0	0	0	0	60	32	27	41	30	0	1	68	0
0	0	0	1	0	0	M	62	20.03	0	130	5	0	0	64	142	75	9.46	179	2.74	583.18	4.9	39	2.23	85	0	1	5	1	0	1	0	0	0	1	1	0	1	55	31	31	43	26	0	0	48	0
0	0	0	1	0	0	F	75	22.6	0	101	6	0	0	52	94	60	8.15	132	0.98	1157.82	11.01	20	1.95	85	1	1	5	1	1	0	0	0	0	1	0	1	1	63	26	32	44	29	0	0	76	0
1	0	0	0	0	1	M	64	23.66	1	132	7	0	0	65	155	89	9.91	124	16	1332.15	5.74	58	2.47	85	1	1	4	2	1	1	0	0	0	0	0	0	0	52	30	28	44	29	0	1	84	0
0	0	0	1	0	0	M	69	20.83	0	116	0	0	0	70	74	56	10.78	222	10.554	3964.69	8.75	33	1.91	85	0	1	4	2	1	0	0	0	1	1	1	0	0	40	31	33	44	31	0	0	58	0
0	0	0	1	0	0	M	68	29.76	1	122	3	0	0	70	125	78	10.19	222	6.9	2240	4.8	91	2.53	85	1	1	5	2	0	0	0	0	1	0	1	0	0	42	33	28	46	29	0	1	69	0
1	0	0	0	0	0	M	47	23.23	1	136	3	0	0	98	122	78	14.2	192	5.377	350.77	6.92	24	3.27	85	1	1	4	1	0	0	0	0	2	0	0	0	1	63	34	28	49	27	0	0	77	0
0	0	0	1	0	0	M	62	25.2	1	119	3	0	0	79	108	60	8.63	319	0.257	601.12	4.26	17	5.77	85	1	1	4	1	0	0	0	0	0	0	0	0	1	61	32	28	49	25	0	1	95	0
0	0	0	1	0	0	M	50	25.4	1	152	5	0	0	86	116	86	18.75	220	7.08	1276.58	4.84	95	2.15	85	1	1	4	2	0	0	0	0	1	0	0	0	0	46	33	34	49	32	0	0	61	0
0	0	0	1	0	0	M	63	24.61	1	136	7	0	0	68	138	80	7.14	164	5.95	1880.46	6.7	21	3.84	85	1	1	4	1	0	1	0	0	0	0	0	0	1	54	33	30	49	29	0	0	79	0
0	0	0	1	0	0	F	74	25.39	0	116	5	0	0	90	119	76	7.1	170	3.2	5130	7.65	38	2.62	85	1	1	5	2	1	1	0	0	2	0	2	0	0	48	36	28	49	28	0	1	77	0
0	0	0	1	1	0	M	54	21.04	1	126	3	0	0	74	94	54	19.4	273	16	7068.75	6.04	94	2.86	85	1	1	5	4	0	0	0	0	0	0	1	0	0	45	30	33	49	31	0	0	64	0
0	0	0	1	0	0	F	67	21.64	0	111	1	0	0	107	116	72	7.52	205	8.932	10108.5	13.5	203	1.91	85	0	1	4	1	1	0	0	0	1	0	0	0	0	54	33	30	49	29	0	1	2	1
0	0	0	1	0	0	M	69	24.8	0	141	3	0	0	72	102	68	6.45	116	16	3531.08	4.5	7	2.8	85	1	1	4	1	0	0	0	0	1	0	1	1	0	43	30	34	50	28	0	0	64	0
0	0	0	1	1	0	M	54	22.31	0	141	5	0	0	62	120	70	5.12	241	0.252	1436.24	4.62	114	2.3	85	1	1	4	1	0	0	0	0	1	0	0	0	1	64	33	33	51	35	0	0	58	0
0	0	0	1	1	1	M	47	23.18	1	146	5	0	0	66	128	76	15.52	253	16	182.68	4.74	69	3.42	85	1	1	5	1	0	0	0	0	0	0	0	0	1	71	34	30	53	29	0	0	46	0
1	0	0	0	0	0	M	77	29.05	0	128	1	0	0	78	128	85	6.42	96	2.691	8317.06	5.84	42	2.11	85	0	1	4	1	0	1	0	0	0	0	0	0	0	48	46	37	53	32	0	1	66	0
0	0	0	1	0	0	M	47	31.46	1	166	5	0	0	96	140	100	19.85	239	5.293	1161.56	4.88	27	3.38	85	0	1	5	1	0	1	0	0	0	0	0	0	0	52	35	32	55	30	0	0	45	0
1	0	0	0	1	0	M	63	26.73	1	148	5	0	0	81	114	56	10.56	163	16	1174.32	6.14	29	2.43	85	1	1	4	1	0	0	0	0	0	0	1	0	1	50	34	31	57	30	0	0	93	0
1	0	0	0	1	0	M	70	19.36	0	142	5	0	0	81	140	74	6.88	215	4.851	978.36	4.28	22	3.27	86	0	1	4	1	0	0	0	0	0	0	0	0	1	60	28	25	40	24	0	0	73	0
0	0	0	0	0	0	M	49	31.25	1	145	5	0	0	87	144	96	12.96	210	2.661	1391.34	5.91	21	2.87	86	0	1	4	1	0	1	0	0	0	0	0	0	1	58	31	28	41	29	0	0	52	0
1	0	0	0	0	0	M	61	25.61	1	145	1	0	0	60	120	80	11.14	310	5.729	2132.94	7.32	46	2.77	86	1	1	4	1	1	1	0	0	1	0	1	0	1	77	34	34	41	31	0	1	84	0
0	0	0	1	1	0	M	71	22.96	1	151	7	0	0	78	184	88	10.74	272	8.328	1693.09	6.56	26	2.59	86	1	1	4	1	0	1	0	0	1	0	1	0	1	68	28	27	43	26	0	0	46	0
0	0	0	1	1	0	M	66	28.23	0	163	5	0	0	67	149	87	7.84	198	0.101	385.03	10.65	45	1.1	86	1	1	5	1	1	1	0	0	0	0	0	0	0	51	33	32	45	27	0	1	61	0
0	0	0	1	0	0	F	69	23.44	0	120	1	0	0	60	128	70	7.17	157	7.697	1533.84	6.22	16	2.02	86	1	1	5	1	0	1	0	0	0	1	0	0	1	62	37	27	45	27	0	1	48	0
0	0	0	1	1	0	M	51	25.95	0	146	7	0	0	86	138	96	7.93	356	1.149	355.24	4.91	116	2.85	86	0	1	4	1	0	1	0	0	0	0	0	0	1	67	33	30	47	28	0	0	68	0
0	0	0	1	1	0	M	46	26.73	1	138	5	0	0	88	109	76	5.04	176	16	920.39	5	47	1.96	86	1	1	4	1	0	0	0	0	1	0	1	0	0	50	34	27	48	25	0	0	52	0
0	0	0	1	0	0	M	75	18.03	1	125	5	0	0	70	130	60	12.59	260	7.3	2922.22	5.94	32	2.23	86	1	1	5	2	0	1	0	0	1	1	0	1	0	59	32	29	48	29	0	1	69	0
0	0	0	1	0	0	F	76	21.64	0	118	0	0	0	70	133	82	5.86	259	5.331	518.7	5.64	27	3.69	86	1	1	4	1	0	1	0	0	0	0	0	0	1	54	33	30	49	29	0	1	70	0
0	0	0	1	0	0	M	47	30.45	0	147	5	0	0	74	110	70	13.46	213	7.754	625.18	6.48	58	2.3	86	0	1	5	1	0	0	0	0	0	0	1	0	1	70	28	29	49	28	0	1	71	0
0	0	0	1	0	0	F	75	24.73	0	131	1	0	0	60	136	72	12.99	131	6.037	1181.48	21.15	66	2.85	86	0	1	5	2	1	1	1	0	1	0	0	0	0	54	33	30	49	29	0	0	84	0
1	0	0	0	0	0	M	63	25.91	0	139	5	0	0	61	140	82	9.24	145	15.14	1224.51	5.28	68	2.87	86	0	1	5	1	0	1	0	0	2	2	1	0	1	60	37	34	49	32	0	0	80	0
0	0	0	1	0	0	F	70	26.03	0	103	3	0	0	62	102	56	8.4	95	15.858	1709.77	6.35	66	1.29	86	0	1	4	1	0	1	0	0	1	0	0	0	0	54	33	30	49	29	0	1	99	0
0	0	0	1	1	0	M	57	19.49	1	130	5	0	0	76	102	72	11.28	195	16	2098.95	4.84	89	1.24	86	1	1	4	1	0	0	0	0	1	0	0	0	0	54	33	30	49	29	0	0	96	0
0	0	0	1	0	1	M	68	23.94	0	122	6	0	0	96	179	106	8.24	182	1.495	13061.3	5.83	22	2.97	86	0	0	0	2	0	1	1	0	1	0	0	0	0	54	33	30	49	29	0	0	2	1
0	0	0	1	0	0	M	57	22.68	1	138	1	0	0	58	98	52	12.22	148	16	1870.11	11.99	89	2.53	86	0	1	4	1	1	1	0	0	1	0	0	1	0	56	35	32	50	27	0	0	59	0
1	0	0	0	0	0	M	72	20.63	0	94	5	0	0	101	138	76	5.7	473	0.431	2894.92	5.31	20	2.2	86	1	1	4	1	0	1	0	1	1	1	1	0	0	53	32	28	51	31	0	0	54	1
0	0	0	1	1	0	M	38	28.08	1	159	5	0	0	69	140	86	8.06	186	10.012	692.14	3.81	49	4.87	86	1	1	4	1	1	0	0	0	0	0	0	0	0	60	30	26	52	26	0	1	103	0
0	0	0	1	1	0	M	27	25.61	1	152	5	0	0	106	145	97	7.28	190	4.662	699.39	4.71	73	2.79	86	0	1	4	1	0	1	0	0	1	0	1	0	0	46	34	35	52	28	0	0	51	0
0	0	0	1	1	0	M	67	30.8	1	152	5	0	0	90	155	56	9.12	230	16	333.02	6.28	54	2.22	86	1	1	4	1	1	1	0	0	1	0	0	0	0	48	36	26	53	28	0	1	61	0
0	0	0	1	0	0	M	41	19.72	1	146	3	0	0	62	74	40	13.05	217	16	430.84	6.29	25	3.96	86	0	1	4	4	0	0	0	0	1	0	0	0	0	47	34	30	54	31	0	1	77	0
1	0	0	0	0	0	F	76	25.97	0	99	5	0	0	74	128	73	7.24	251	9.13	9718.15	5.34	29	2.71	86	0	1	5	2	0	1	0	0	1	1	0	1	0	45	49	29	56	28	0	0	54	0
0	0	0	1	0	0	M	61	23.05	1	144	5	0	0	91	94	68	11.47	193	2	1210	5.55	50	2.67	86	1	1	4	1	0	0	0	0	2	0	0	0	0	44	41	31	58	25	0	0	97	0
1	0	0	0	1	0	M	47	23.62	1	129	3	0	0	79	100	68	9.86	318	0.97	3789.16	6.34	133	1.9	86	1	1	5	3	0	0	0	0	2	0	1	0	0	31	38	28	63	24	0	1	54	0
0	0	0	1	0	0	M	67	20.45	0	128	0	1	0	82	89	75	10.46	199	16	2648.65	10.27	45	2.57	87	1	1	4	2	0	1	0	0	0	0	0	0	0	49	29	27	39	27	0	1	47	0
0	0	0	1	0	1	F	75	25.86	0	99	5	0	0	57	142	72	6.61	196	0.673	213.96	11.87	20	1.52	87	1	1	4	1	1	0	0	0	0	0	1	0	0	57	26	28	41	32	0	0	60	0
0	0	0	1	0	1	M	65	25.16	1	144	1	0	0	53	128	76	11.43	158	12.019	3057.51	4.75	23	2.65	87	1	1	4	1	0	0	0	0	0	0	1	0	0	53	27	27	42	29	0	0	62	0
0	0	0	1	0	0	F	66	22.04	0	129	5	0	0	63	108	56	7.12	135	3.635	3837.86	6.18	35	1.77	87	1	1	4	3	1	1	0	0	1	0	0	0	0	52	31	28	43	26	0	1	70	0
1	0	0	0	0	0	M	45	24.22	1	151	5	0	0	57	108	75	10.13	64	16	1170.85	6.01	37	1.19	87	1	1	5	1	0	0	0	0	1	0	0	0	0	57	32	35	44	29	0	0	45	0
0	0	0	1	0	0	M	65	23.61	1	125	3	0	0	69	98	60	7.6	179	2.715	1710.38	4.41	19	2.92	87	1	1	4	1	0	0	0	0	1	0	1	0	1	68	29	30	44	29	0	0	50	0
1	0	0	0	1	1	M	45	24.22	1	151	5	0	0	70	127	74	14.75	233	16	283.86	5.79	130	2.82	87	1	1	7	1	0	0	0	0	1	0	0	0	0	45	33	29	45	25	0	0	59	0
1	0	0	0	0	0	M	72	17.99	1	149	3	0	0	64	122	72	9.36	175	16	814.33	4.8	84	2.85	87	0	1	4	1	0	0	0	0	0	0	0	0	1	59	29	30	45	29	0	0	98	0
0	0	0	1	1	0	F	64	20.92	0	103	5	0	0	63	130	70	7.09	238	5.629	1835.8	4.79	26	2.52	87	1	1	5	1	0	1	0	0	1	1	1	0	1	56	30	30	46	28	0	1	51	0
0	0	0	1	0	1	M	51	25.53	1	153	7	0	0	58	156	97	9.66	311	1.958	2382.27	6.35	64	5.04	87	1	1	5	1	0	1	0	0	0	0	0	0	0	72	38	25	46	26	0	0	74	0
0	0	0	1	0	1	M	67	22.49	1	136	5	0	0	86	129	98	10.92	216	1.792	274.91	5.22	36	2.51	87	0	1	5	1	0	0	0	0	1	0	1	1	0	49	34	35	48	28	0	0	50	0
0	0	0	1	0	0	F	61	28.89	0	101	5	1	0	80	150	100	10.03	297	11.833	947.1	14.38	54	2.49	87	1	1	4	1	1	0	0	0	2	0	1	0	1	68	39	32	48	32	0	1	67	0
1	0	0	0	0	0	M	48	25.83	1	152	5	0	0	46	158	92	11.42	154	16	369.45	5.09	33	2.29	87	1	1	4	1	1	0	0	0	1	0	0	0	0	54	33	30	49	29	0	0	99	0
0	0	0	1	0	0	F	77	19.81	0	119	7	0	0	81	198	96	10.4	190	10.296	845.26	7.64	25	1.94	87	0	1	4	1	1	1	0	0	1	0	0	0	0	54	33	30	49	29	0	1	99	1
0	0	0	1	0	0	M	45	29.38	0	135	5	0	0	44	92	58	16.47	229	16	1215.41	7.32	64	2.23	87	1	1	4	1	0	1	0	0	1	0	0	0	0	54	33	30	49	29	0	1	94	0
0	0	0	1	0	0	F	74	18.55	0	86	3	0	0	58	78	56	15.87	483	16	2321.46	7.2	53	1.36	87	0	1	4	1	0	0	0	0	1	0	0	0	0	54	33	30	49	29	0	0	84	0
0	0	0	1	0	0	M	80	24.44	0	121	5	0	0	102	150	90	7.58	131	9.654	2507.19	8.94	130	2.05	87	0	1	4	2	1	1	1	0	1	0	0	0	0	54	33	30	49	29	0	0	84	0
1	0	0	0	1	0	M	65	25.1	1	122	0	0	0	58	90	64	6.39	170	0.095	2596.87	6.6	49	2.87	87	1	1	4	1	0	0	1	0	1	0	0	0	0	54	33	30	49	29	0	0	102	0
0	0	0	1	1	0	M	43	22.86	1	163	5	0	0	74	107	74	10.58	202	16	1912.09	5.23	63	2.63	87	1	1	4	1	0	0	0	0	0	0	0	0	0	51	30	30	50	30	0	0	67	0
1	0	0	0	0	0	M	72	22.68	1	117	5	0	0	72	136	68	9.82	142	2.74	2378.38	7.52	14	0.89	87	0	1	4	1	1	1	0	0	1	0	0	1	1	61	35	31	50	32	0	1	52	1
0	0	0	1	0	0	M	83	27.7	1	124	6	1	0	87	130	70	6.77	323	0.194	1491.98	5.38	21	2.3	87	0	1	4	1	0	1	0	0	0	1	0	0	0	66	33	34	51	31	0	1	58	1
1	0	0	0	0	0	M	52	25.95	0	136	5	0	0	66	128	76	5.33	131	5.022	634.94	5.67	21	2.52	87	0	1	4	1	0	1	0	0	1	0	1	1	0	64	38	32	52	30	0	0	54	0
1	0	0	0	0	1	M	75	24.24	0	130	0	0	0	77	167	80	13.22	141	7.05	8898.28	8.53	34	2.52	87	1	1	5	3	1	1	1	0	3	1	2	0	0	35	49	37	54	33	0	1	25	1
0	0	0	1	0	1	M	60	22.1	1	144	5	0	0	73	137	80	8.38	147	16	1359.58	6.29	32	1.71	87	1	1	4	1	0	1	0	0	1	0	0	0	0	43	37	33	58	30	0	0	48	1
1	0	0	0	0	0	M	37	25.63	1	137	0	0	0	79	90	60	5.98	221	6.223	1435.01	6.7	88	2.8	88	0	1	4	1	0	0	0	0	1	0	0	0	0	64	37	31	37	32	0	0	98	0
0	0	0	1	0	0	M	53	25.89	1	143	5	0	0	62	110	90	13.29	281	7.056	2638.76	5.63	43	2.98	88	0	1	4	1	1	0	0	0	1	0	0	0	1	73	31	29	37	29	0	0	77	0
0	0	0	1	0	0	M	42	23.18	0	93	0	0	0	92	115	76	8.7	499	0.39	1490.06	6.3	45	1.82	88	0	1	1	1	1	0	0	0	1	0	0	0	0	55	37	31	40	27	0	0	73	0
1	0	0	0	1	0	F	58	20.43	1	132	0	0	0	70	134	74	8.61	261	13.981	1570.32	3.79	46	2.75	88	0	1	4	1	0	0	0	0	1	0	2	0	0	61	32	28	42	27	0	0	69	0
0	0	0	1	1	0	M	73	18.83	0	103	5	1	0	73	124	71	6.27	252	0.001	5252.39	4.65	18	0.99	88	0	1	4	2	0	0	0	0	0	1	2	0	0	44	27	32	42	29	0	1	77	0
0	0	0	1	1	0	M	62	21.83	1	109	5	0	0	70	150	80	8.37	261	4.47	1093.82	4.89	28	2.19	88	0	1	4	1	0	1	0	0	1	0	1	0	1	63	25	30	43	29	0	0	77	0
0	0	0	1	1	0	F	68	23.09	0	128	5	0	0	68	138	82	5.04	159	0.051	59	4.62	17	2.35	88	0	1	5	1	0	1	0	0	0	1	0	0	0	66	26	27	44	25	0	0	85	0
0	0	0	1	1	0	M	46	27.05	1	157	5	0	0	81	126	80	13.64	245	16	381.12	5.38	77	4.24	88	1	1	4	1	0	0	0	1	0	0	0	0	0	61	33	29	44	31	0	0	62	0
1	0	0	0	0	0	F	72	23.81	1	126	5	0	0	71	138	78	9.8	122	0.024	2638.76	3.99	28	2.9	88	0	1	4	1	0	1	0	0	1	0	1	0	1	62	29	28	44	27	0	0	97	0
0	0	0	1	0	0	M	75	20.29	0	123	5	0	0	67	120	60	5.14	138	0.155	3591.74	5.95	37	1.64	88	1	1	5	1	1	1	0	0	0	0	0	1	1	63	32	29	44	31	0	0	69	0
1	0	0	0	0	0	F	61	20.43	0	130	5	0	0	69	140	90	9.48	212	0.53	68	6.7	45	3.31	88	1	1	4	1	0	1	0	0	0	0	0	0	0	58	28	28	45	27	0	0	70	0
0	0	0	1	0	0	M	60	24.93	0	152	1	0	0	52	128	80	4.89	186	0.001	853.84	4.71	34	2.26	88	1	1	4	1	0	1	0	0	1	0	1	0	0	65	33	34	45	34	0	1	60	0
0	0	0	1	0	0	M	68	20.2	1	117	0	0	0	84	136	74	8.01	196	6.695	964.98	7.82	31	1.8	88	1	1	7	1	0	0	0	0	1	1	1	0	0	50	39	34	45	33	0	0	16	1
0	0	0	1	0	0	M	69	21.26	1	131	5	0	0	62	120	80	5.65	84	0.87	287.83	5.05	20	2.03	88	1	1	4	1	0	0	0	0	0	0	1	1	1	66	33	31	46	28	0	0	95	0
0	0	0	1	0	0	M	80	18.18	1	118	6	0	0	78	122	68	6.5	277	7.458	1313.4	4.81	17	2.25	88	0	0	4	1	1	1	0	0	0	0	1	0	1	73	32	27	46	30	0	1	4	1
0	0	0	1	1	0	M	62	24.31	1	144	3	0	0	68	129	69	9.37	141	16	1668.73	9.74	42	1.56	88	1	1	7	2	1	1	0	0	0	0	0	0	1	60	32	32	46	26	0	0	53	0
1	0	0	0	1	0	M	34	22.11	1	137	5	0	0	64	92	50	5.05	168	0.94	1726.6	4.24	67	3.04	88	1	1	4	1	0	0	0	0	1	0	0	1	0	65	29	30	47	26	0	0	100	0
1	0	0	0	0	0	F	63	23.92	0	140	7	0	0	75	168	102	6.4	189	1.35	1974.42	6.13	50	1.87	88	0	1	5	1	1	1	0	0	0	2	0	0	0	50	27	27	47	26	0	0	81	0
0	0	0	1	0	0	M	57	20.07	1	120	5	0	0	67	110	68	6.94	247	5.072	607.53	4.43	24	1.89	88	0	1	5	1	0	0	0	0	0	0	0	0	0	64	33	34	48	33	0	0	62	0
0	0	0	1	0	0	M	61	20.76	1	150	3	0	0	57	150	75	6.65	127	0.139	1071.16	4.79	14	3.3	88	0	1	4	1	0	0	0	0	1	1	1	1	0	51	33	32	48	30	0	0	78	0
1	0	0	0	0	0	M	53	23.6	1	144	5	0	0	64	138	75	7.99	195	2.324	210.2	8.3	29	2.52	88	1	1	5	1	0	1	0	0	1	0	0	0	0	54	33	30	49	29	0	0	55	0
0	0	0	1	0	0	M	74	25.71	1	140	7	0	0	62	168	80	9.99	314	16	1417.2	10.65	33	3.96	88	1	1	4	1	1	1	0	0	1	0	0	0	0	54	33	30	49	29	0	0	102	0
0	0	0	0	0	0	M	73	24.62	1	136	5	0	0	60	100	60	14.35	134	16	1541.54	6.96	20	2.52	88	1	1	5	1	0	1	1	0	1	0	0	0	0	54	33	30	49	29	0	0	79	0
1	0	0	0	0	1	F	69	23.94	1	71	3	0	0	77	120	81	9.48	308	0.744	2449.35	16.02	45	3.25	88	0	1	2	1	0	0	1	0	1	0	0	0	0	54	33	30	49	29	0	0	2	1
0	0	0	1	1	1	M	78	26.78	0	144	4	0	0	63	143	73	8.88	164	16	2488.2	5.6	42	2.29	88	1	1	5	2	0	1	1	0	0	0	0	0	0	46	29	32	49	31	0	1	51	0
0	0	0	1	0	0	F	65	21.93	0	112	5	0	0	72	118	72	7.26	308	4.347	2638.76	4.07	153	1.7	88	1	1	4	1	0	0	0	0	1	1	1	0	0	48	29	24	49	24	0	0	59	0
0	0	0	1	0	0	M	66	23.38	1	135	5	0	0	60	92	64	6.95	257	0.001	4379.83	5.06	32	2.072	88	1	1	4	2	0	0	0	0	1	0	0	0	0	54	33	30	49	29	0	0	77	0
0	0	0	1	0	0	M	83	21.77	0	130	5	0	0	100	149	66	7.17	121	0.26	25200	6.7	45	2.52	88	0	1	4	2	0	0	0	0	1	0	0	0	0	54	33	30	49	29	0	0	24	1
1	0	0	0	0	0	M	79	25.97	0	128	5	1	0	89	122	65	6.57	170	16	3161.47	6.7	45	2.52	88	1	1	4	2	0	1	0	0	0	1	0	0	1	56	41	29	50	29	0	1	44	0
1	0	0	0	1	0	M	85	26.64	0	135	3	0	0	87	126	84	8.88	147	6.524	7551.77	14.79	24	2.9	88	0	1	4	2	1	1	1	0	0	1	0	0	0	42	33	33	51	30	0	0	1	1
0	0	0	1	0	0	M	74	20.24	1	89	2	0	0	60	124	68	5.5	214	2.092	3651.2	5.8	16	3.18	88	0	1	2	1	0	0	0	0	0	1	0	0	0	69	31	32	52	28	0	0	22	1
1	0	0	0	0	0	M	78	20.28	1	81	7	0	0	74	118	72	4.92	124	6.738	4121.7	5.79	25	1.86	88	1	1	4	1	0	0	0	0	1	0	1	0	0	40	30	30	52	35	0	1	76	0
0	0	0	1	0	0	M	70	25.35	1	127	7	0	0	105	162	82	8.83	128	16	833.52	8.43	26	2.49	88	1	1	4	2	1	1	0	0	0	1	1	0	0	53	31	36	53	37	0	1	76	1
0	0	0	1	0	0	M	76	28.48	0	93	4	0	0	54	156	75	8.89	222	1.816	2342.75	8.17	56	1.26	88	0	1	4	2	0	0	0	0	1	0	1	0	1	56	35	35	53	33	0	1	53	0
0	0	0	1	0	0	M	58	21.71	0	110	5	0	0	68	80	50	12.37	193	15.78	3193.51	5.68	21	1.95	88	1	1	4	1	0	0	0	0	1	0	0	0	0	58	36	27	53	27	0	1	100	1
0	0	0	1	0	0	M	53	21.77	1	118	3	0	0	88	128	76	16.5	216	16	2524.46	6.15	35	1.39	88	1	1	5	1	0	1	0	0	2	1	1	0	0	48	35	30	54	30	0	0	55	0
0	0	0	1	1	0	F	61	19.05	0	141	3	0	0	70	93	61	5.75	156	0.301	7841.65	10.24	23	1.81	88	1	1	4	2	1	1	0	0	0	0	0	0	0	31	33	29	55	26	0	0	54	0
0	0	0	1	0	0	M	80	25.16	1	116	1	0	0	68	113	62	6.71	226	16	3148.91	5.59	51	3.32	88	1	1	4	1	0	1	0	0	2	1	1	0	0	44	32	33	56	29	0	1	41	1
0	0	0	1	0	0	F	70	24.97	1	98	3	0	0	81	100	65	5.59	244	3.07	4457.3	6.44	47	2.11	88	0	1	4	3	0	0	0	0	2	1	1	0	0	48	40	30	57	29	0	1	17	1
0	0	0	1	0	0	M	68	27.43	1	128	5	0	0	106	144	86	8.57	285	2.515	7869.25	6.7	13	2.95	88	1	1	5	3	0	0	0	0	2	0	0	0	0	17	43	29	58	29	0	0	47	0
0	0	0	1	1	0	M	84	26.03	0	138	1	0	0	87	140	90	4.4	171	2.142	4771.73	9.18	20	2.8	88	0	1	4	3	1	0	0	0	2	0	0	0	1	56	43	42	67	37	0	0	96	0
0	0	0	1	0	0	M	60	27.34	1	114	3	0	0	84	102	70	8	91	6.94	1479.74	12.04	33	2.04	88	0	1	4	1	1	1	0	0	0	0	0	0	0	57	37	24	68	24	0	0	102	0
0	0	0	1	1	0	M	58	24.22	1	141	5	0	0	86	128	68	10.31	220	16	621.84	6.51	33	3.93	89	1	1	4	1	0	0	0	0	0	0	0	0	1	58	31	29	40	25	0	0	103	0
0	0	0	0	0	0	M	78	15.63	1	125	1	0	0	78	118	68	12.39	191	7.659	2269.79	4.4	45	1.71	89	0	1	5	1	0	1	1	0	1	0	0	0	0	60	30	28	41	26	0	0	82	0
0	0	0	1	1	0	M	54	24.79	0	135	3	0	0	64	134	82	5.5	218	0.049	678.97	13.89	35	1.49	89	1	1	4	1	1	0	0	0	1	0	1	0	0	48	33	29	43	29	0	0	48	0
0	0	0	1	1	0	F	65	23.94	0	139	5	0	0	88	120	78	7.49	243	0.162	856.08	4.86	19	2.28	89	1	1	4	1	0	1	0	0	0	0	0	0	1	75	28	29	43	26	0	0	99	0
0	0	0	1	0	0	M	42	26.52	0	144	5	0	0	93	131	94	7.62	300	4.926	1930.05	5.43	54	3.1	89	1	1	4	1	0	0	0	0	1	0	0	0	1	61	34	34	43	34	0	1	45	0
0	0	0	1	1	0	M	53	26.99	0	155	7	0	0	70	154	94	6.14	204	0.86	1002.64	4.83	52	2.3	89	1	1	4	1	0	1	0	0	0	1	0	0	1	61	36	24	44	29	0	0	100	0
0	0	0	1	1	0	M	51	23.44	1	141	5	0	0	77	116	84	9.94	291	4.088	1018.13	12	30	2.68	89	1	1	4	1	1	0	0	0	1	0	1	0	1	62	37	30	46	30	0	0	47	0
0	0	0	1	1	0	M	69	24.71	1	160	7	0	0	70	140	80	9.85	262	1.565	125.94	7.51	60	0.82	89	1	1	4	1	1	1	0	0	0	0	0	0	1	60	33	29	47	29	0	0	51	0
0	0	0	1	1	1	M	45	24.49	1	170	7	0	0	93	183	108	11.07	154	1.586	113.07	6.49	32	2.99	89	1	1	5	1	1	1	0	0	0	0	0	0	0	49	33	28	48	28	0	0	51	0
0	1	1	1	0	0	M	71	22.67	1	101	5	1	0	81	128	65	5.78	153	1.493	2769.59	3.93	12	2.71	89	1	1	4	1	0	1	0	0	1	1	0	0	0	32	35	25	48	21	0	1	45	0
0	0	0	1	0	0	F	71	23.94	0	133	2	0	0	94	188	104	16.93	213	0.009	784.18	11.25	39	3.13	89	0	0	4	3	0	1	0	0	1	0	0	0	0	54	33	30	49	29	0	0	1	1
1	0	0	0	1	0	F	77	24.03	0	98	5	0	0	73	118	60	7.71	86	1.877	1450.98	4.33	11	2.09	89	1	1	4	1	0	1	0	0	1	0	0	0	0	54	33	30	49	29	0	0	89	1
1	0	0	0	0	0	F	69	23.62	0	121	5	1	0	83	147	77	8.16	170	2.387	2673.76	6.16	13	2.4	89	0	1	4	1	1	1	0	0	1	0	0	0	0	54	33	30	49	29	0	1	14	1
0	0	0	1	1	0	F	52	20.39	1	106	0	0	0	90	117	65	14.86	157	16	2013.26	15.01	132	1.78	89	0	1	5	4	1	0	0	0	1	1	1	0	1	56	41	35	51	34	0	0	17	1
0	0	0	1	0	0	M	74	23.51	1	123	6	0	0	71	150	80	4.8	138	6.238	878.8	4.14	22	2.97	89	1	1	5	1	0	1	0	0	0	1	1	0	1	56	32	24	53	23	0	0	74	0
0	0	0	1	0	0	M	64	28.08	1	134	5	0	0	76	116	93	8.43	179	0.407	165.93	5.76	25	2.26	89	1	1	7	4	0	0	0	0	0	0	1	0	0	42	31	36	55	31	0	1	53	0
0	0	0	1	0	0	M	75	19.13	1	120	5	0	0	58	110	70	3.6	115	16	7310.96	5.22	48	2.68	89	1	1	4	1	0	1	0	0	2	0	2	1	1	54	38	36	57	29	0	1	99	0
0	0	0	1	0	0	M	55	28.72	1	145	5	0	0	82	134	92	5.98	240	4.015	5448.53	5.14	45	2.52	89	1	1	4	2	0	0	0	0	3	1	2	1	0	35	55	38	82	35	0	0	55	0
0	0	0	1	1	1	M	67	22.5	0	152	3	0	0	90	128	76	6.26	214	0.405	233.78	5.52	26	1.19	90	1	1	5	1	1	1	0	0	0	1	0	0	1	54	28	27	40	24	0	0	47	0
0	0	0	1	1	0	F	48	31.11	0	131	5	0	0	94	118	76	12.18	301	16	2527.95	10.29	108	3.85	90	1	1	4	4	0	1	0	0	0	0	1	0	0	42	30	25	41	25	0	1	60	0
1	0	0	0	0	0	M	52	23.34	1	139	5	0	0	70	102	70	9.76	191	0.11	618.55	6.87	68	3.18	90	0	1	4	1	1	0	0	0	1	0	1	0	0	51	28	30	42	29	0	0	63	0
1	0	0	0	0	0	M	71	21.48	1	133	5	0	0	74	140	80	7.81	159	0.001	382.21	6.7	10	2.37	90	0	1	5	1	0	1	1	0	0	0	1	0	1	58	31	30	44	30	0	0	38	1
0	0	0	1	1	0	F	79	17.78	1	117	3	0	0	78	120	80	6.12	185	11.869	1254.13	6.62	23	3.65	90	0	1	4	1	0	0	0	0	1	0	2	2	0	52	28	26	44	28	0	0	16	1
0	0	0	1	0	0	M	46	25.33	1	139	5	0	0	85	145	85	7.44	223	1.749	320.85	5.22	45	7.29	90	0	1	5	1	1	0	0	0	0	0	0	0	0	71	29	28	45	27	0	0	76	0
0	0	0	1	0	1	M	32	26.81	0	164	3	0	0	112	130	90	12.47	286	9.223	513.95	6.95	49	4.43	90	1	1	4	1	0	0	0	0	1	0	0	0	0	44	28	26	46	29	0	1	68	0
1	0	0	0	0	0	M	51	24.91	1	138	5	0	0	68	116	72	9.4	267	16	265.16	5.2	32	3.23	90	1	1	4	1	0	1	0	0	1	1	1	0	1	56	30	32	47	30	0	0	77	0
0	0	0	1	1	0	M	60	25.95	1	134	1	0	0	60	130	85	4.31	227	0.099	673.62	5.27	46	2.64	90	1	1	4	1	0	1	0	0	0	0	0	0	0	50	35	34	47	33	0	1	80	0
0	0	0	1	0	1	M	70	20.76	1	105	5	0	0	70	160	86	6.74	126	12.645	1170.72	6.78	72	1.58	90	0	1	4	1	0	1	0	0	1	0	0	0	1	59	32	32	47	29	0	0	88	0
0	0	0	1	0	0	M	37	21.3	1	112	0	0	0	62	90	58	6.4	158	15.336	2561.51	4.64	33	1.79	90	1	1	4	1	0	0	0	0	0	0	0	0	0	65	25	30	47	32	0	0	76	0
0	0	0	1	1	0	M	71	23.14	1	133	3	0	0	88	128	76	18.16	242	16	1599.17	7.33	64	2.47	90	1	1	5	1	0	1	0	0	1	0	1	0	0	48	32	27	48	30	0	0	44	0
0	0	0	1	1	0	M	79	20.24	1	109	1	0	1	78	152	92	9.52	108	16	2270.61	6.38	24	2.65	90	0	1	5	1	0	0	0	0	0	0	0	0	0	46	26	24	48	23	0	0	76	0
1	0	0	0	0	0	M	65	22.15	0	137	2	0	0	103	168	92	5.37	251	0.036	139.61	5.38	14	3.4	90	0	1	4	2	1	1	0	0	1	0	0	0	0	54	33	30	49	29	0	0	1	1
1	0	0	0	0	0	M	51	25.39	1	138	3	0	0	76	120	72	8.63	284	14.144	1508.19	6.76	66	3.01	90	0	1	5	1	1	0	0	0	1	0	0	0	0	54	33	30	49	29	0	1	68	0
0	0	0	1	0	0	M	46	29.3	1	142	5	0	0	77	106	66	7.39	219	1.866	1661.49	4.78	44	2.77	90	1	1	4	1	0	0	0	0	1	0	0	0	0	54	33	30	49	29	0	0	50	1
0	0	0	1	0	0	M	63	21.45	1	158	3	0	0	67	105	64	11.11	143	6.814	3831.28	4.69	22	1.99	90	1	1	5	1	0	0	1	0	1	0	0	0	0	48	31	32	49	26	0	1	50	0
0	0	0	1	0	0	M	73	24.41	1	133	5	0	1	76	170	90	10.21	204	16	1294.79	5.1	72	2.57	90	1	1	4	1	1	0	0	0	1	1	1	0	1	59	27	25	50	28	0	1	98	0
1	0	0	0	0	0	M	52	27.89	0	152	1	0	0	76	132	80	9.42	194	16	1655.8	5.63	29	2.8	90	1	1	4	1	0	0	0	0	0	0	0	0	0	52	30	29	50	26	0	1	78	0
1	0	0	0	0	0	M	47	25.61	1	149	5	0	0	63	110	70	10.11	213	15.363	1760.08	5.98	55	3.26	90	1	1	4	1	0	0	0	0	0	0	1	0	1	62	35	32	50	31	0	0	65	0
1	0	0	0	0	0	M	66	23.94	0	93	5	0	0	90	114	62	9.34	248	0.096	3578.73	6.7	32	2.52	90	0	1	4	1	0	1	1	0	0	1	0	0	1	55	43	29	50	31	0	0	35	1
0	0	0	1	0	0	M	52	28.96	1	141	1	0	0	60	153	89	7.24	162	11.998	280.92	4.57	35	1.77	90	1	1	4	1	0	1	0	0	1	0	1	0	0	60	42	34	51	31	0	0	60	0
0	0	0	1	1	0	M	47	27.68	1	150	1	0	0	60	128	78	11.86	186	1.752	499.25	5.61	58	2.68	90	1	1	4	1	0	0	0	0	1	0	1	0	1	64	34	33	56	34	0	0	95	0
1	0	0	0	0	0	F	76	22.77	0	88	5	1	0	76	130	60	6.05	107	1.011	1493.73	9.32	40	1.45	91	0	1	4	1	1	1	1	0	1	0	0	0	1	62	35	33	35	30	0	1	10	1
0	0	0	1	1	0	M	76	27.08	0	103	7	0	0	80	148	82	8.54	240	16	9081.12	8.94	57	1.7	91	0	1	4	2	1	1	1	0	2	0	1	0	1	61	38	36	44	28	0	0	31	1
0	0	0	1	1	0	M	75	23.44	0	120	1	0	0	67	119	74	7.09	181	6.02	1064.92	4.76	31	1.52	91	0	1	5	1	0	1	0	0	0	0	1	1	1	72	29	30	45	28	0	0	54	0
0	0	0	1	0	0	M	54	18.14	1	114	3	0	0	82	106	56	8.87	189	2.713	131.95	16.59	122	2.59	91	1	1	5	1	1	0	0	0	1	0	0	0	0	46	30	27	48	24	0	0	50	0
0	0	0	1	1	0	M	58	22.23	1	155	5	0	0	93	134	90	11.86	98	16	2793.46	5.87	76	2.09	91	1	1	4	1	0	0	0	0	1	0	0	0	1	54	29	28	48	29	0	0	98	0
0	0	0	1	0	0	M	39	26.91	1	121	5	1	0	72	120	58	14.66	262	16	561.02	14.07	52	1.49	91	1	1	4	1	1	0	0	0	1	0	0	0	0	49	34	28	49	26	0	1	49	0
0	0	0	1	0	0	M	74	25.43	1	143	4	0	0	72	120	60	10.46	178	0.961	596.39	4.5	28	1.64	91	1	1	4	1	0	1	0	0	1	0	0	0	0	54	33	30	49	29	0	0	84	0
0	0	0	1	0	0	M	69	24.78	1	129	7	0	0	65	142	78	5.3	207	0.001	773.82	5.12	46	1.47	91	1	1	4	1	1	1	0	0	1	0	0	0	0	54	33	30	49	29	0	0	58	0
0	0	0	1	0	0	M	50	28.03	1	178	5	0	0	82	113	75	14.55	187	16	1022.11	5.39	76	2.89	91	1	1	5	1	0	1	0	0	1	0	0	0	0	54	33	30	49	29	0	1	58	0
0	0	0	0	0	0	M	62	23.83	1	118	1	0	0	55	140	80	7.82	166	6.202	2044.39	12.46	24	0.98	91	1	1	7	1	1	1	0	0	1	0	0	0	0	54	33	30	49	29	0	1	62	0
1	0	0	0	0	0	M	59	25.33	1	124	5	1	0	82	114	68	7.34	272	0.05	2479.81	4.31	38	1.7	91	0	1	4	1	0	0	0	0	1	0	0	0	0	54	33	30	49	29	0	1	83	0
0	0	0	1	0	0	F	81	23.94	0	89	0	0	0	66	84	46	9.02	353	16	3659.56	5.5	9	1.92	91	0	1	7	2	0	0	0	0	1	0	0	0	0	54	33	30	49	29	0	0	7	1
0	0	0	1	0	0	M	78	24	1	114	5	0	0	79	120	80	5.61	160	9.232	7951.36	6.04	69	1.38	91	1	1	4	1	0	1	0	0	1	0	0	0	0	54	33	30	49	29	0	0	53	0
0	0	0	1	0	0	M	69	23.31	1	106	5	0	0	65	116	56	9.63	231	9.444	12817.1	3.96	18	0.92	91	0	1	5	3	0	0	0	0	1	0	0	0	0	54	33	30	49	29	0	0	7	1
1	0	0	0	0	0	M	59	23.89	1	146	5	0	0	72	158	92	6.27	224	12.315	146.76	7.49	37	2.82	91	1	1	5	1	0	1	0	0	0	0	0	0	1	53	35	31	50	29	0	0	69	0
1	0	0	0	0	0	M	63	27.68	1	135	5	0	0	67	136	76	8.86	227	2.584	488.69	6.31	20	2.82	91	1	1	4	1	0	0	0	0	0	0	0	0	0	62	35	31	50	28	0	0	78	0
0	0	0	1	1	0	M	60	24.8	1	153	5	0	0	76	120	80	7.15	205	0.091	1698.24	4.02	30	2.59	91	1	1	4	1	0	0	0	0	0	0	1	0	0	43	29	25	50	27	0	0	58	0
1	0	0	0	0	0	M	35	23.84	1	161	1	1	0	55	137	108	7.26	191	3.084	969.71	4.41	34	1.72	91	1	1	5	1	0	1	0	0	0	0	1	1	0	62	28	28	51	30	0	1	48	0
0	0	0	1	1	0	M	67	20.2	1	147	5	0	0	62	135	90	4.36	197	4.379	2273.12	6.16	17	2.19	91	0	1	5	1	0	0	0	0	1	0	1	0	0	42	30	31	53	31	0	1	57	0
0	0	0	1	0	0	M	47	27.13	1	134	1	0	0	64	105	68	13.68	245	16	4930.27	5.48	48	1.87	91	0	1	7	1	0	1	0	0	1	0	1	1	0	47	37	34	55	35	0	0	41	1
0	0	0	1	0	0	M	59	23.39	1	129	7	0	0	71	146	90	10.8	163	16	1602.59	6.6	47	2.26	91	1	1	4	1	0	0	0	0	0	0	1	0	1	51	38	29	58	28	0	0	100	0
1	0	0	0	1	0	M	71	25.23	0	124	5	0	0	90	97	56	13.51	135	10.058	4079.97	10.03	37	2.75	91	0	1	5	3	1	1	0	0	1	1	1	2	0	35	38	34	66	32	0	0	5	1
1	0	0	0	0	0	M	56	23.46	1	129	5	0	0	66	108	63	6.06	137	0.929	1767.11	4.87	25	1.28	91	1	1	4	1	0	0	0	0	2	1	1	1	0	30	37	32	68	33	0	0	75	0
1	0	0	0	0	0	F	78	19.4	0	111	7	0	0	74	166	66	5.01	150	1.042	8482.54	4.43	28	2.64	91	0	1	4	2	0	1	0	0	3	0	0	0	1	43	46	31	74	28	0	0	20	1
0	0	0	1	0	0	M	68	24.22	0	146	5	0	0	72	115	70	8.13	122	0.205	1157.66	4.9	12	6.43	92	1	1	5	1	0	0	0	0	0	0	1	0	0	56	26	30	41	26	0	0	74	0
0	0	0	1	1	1	M	45	30.37	1	161	1	0	0	70	114	70	8.97	243	16	1	7.41	59	4.8	92	1	1	5	1	0	0	0	0	0	0	0	0	0	47	29	26	42	26	0	1	46	0
0	0	0	1	0	0	M	44	21.97	1	155	6	0	0	75	174	101	7.94	237	0.14	2638.76	5.02	137	3.64	92	1	1	4	1	0	1	0	0	1	0	0	0	0	65	30	27	42	28	0	0	79	0
0	0	0	1	0	0	M	52	29.98	1	147	5	0	0	67	116	70	5.94	202	2.111	645.07	5.31	38	2.73	92	0	1	4	1	0	0	0	0	0	0	0	0	1	63	33	30	43	30	0	0	64	0
0	0	0	1	0	1	F	74	28.04	1	99	0	0	0	77	92	75	9.97	249	2.424	276.61	6.41	49	1.35	92	1	1	5	2	1	1	1	0	0	0	1	0	1	56	27	33	44	31	0	0	51	0
1	0	0	0	0	0	M	60	23.95	0	122	5	1	0	74	130	80	15.47	194	3.405	1508.89	6.7	24	1.82	92	0	1	5	1	1	0	0	0	1	0	1	0	0	71	26	30	44	31	0	1	70	0
1	1	0	0	0	0	M	59	27.89	1	134	5	0	0	66	118	80	7.08	188	0.035	89.09	7.19	22	1.77	92	1	1	4	2	1	0	0	0	0	0	0	0	0	61	32	29	46	30	0	0	80	0
1	0	0	0	1	0	M	50	28.37	1	131	5	0	0	72	118	70	6.42	261	0.302	1081.79	4.88	52	1.21	92	1	1	4	1	0	1	0	0	0	0	0	0	1	56	33	31	46	31	0	0	80	0
0	0	0	1	0	0	M	53	26.81	1	176	5	0	0	84	170	110	11.08	185	0.095	2638.76	6.01	42	3.08	92	1	1	5	1	1	1	0	0	0	0	0	0	0	58	26	27	46	24	0	0	76	0
0	0	0	1	1	0	M	64	25.95	1	138	3	0	0	88	113	63	13.9	210	16	2897.8	6.65	73	2.6	92	0	1	5	1	0	0	0	1	0	1	0	0	0	46	34	28	46	28	0	0	1	1
1	0	0	0	0	0	M	47	20.2	1	123	0	0	0	57	112	75	10.51	255	2.238	1389.29	5.06	28	4.41	92	1	1	4	1	0	0	0	0	1	0	1	0	0	54	28	28	47	31	0	1	51	0
1	0	0	0	0	0	M	66	23.94	1	126	0	0	0	78	165	71	12.65	185	0.358	1480	11.9	22	2.84	92	0	1	4	1	0	0	0	0	1	0	0	0	0	54	33	30	49	29	0	0	73	0
0	0	0	1	0	0	M	52	30.19	1	154	5	0	0	75	119	64	16.05	257	12.088	1762.24	6.56	119	3.33	92	1	1	4	1	0	1	0	0	1	0	0	0	0	64	36	31	49	33	0	0	70	0
1	0	0	0	1	0	M	67	25.61	1	111	0	0	0	62	155	87	3.53	130	11.028	2638.76	4.34	115	1.54	92	1	1	4	1	0	1	0	0	0	0	0	0	0	64	31	33	50	33	0	0	73	0
0	0	0	1	1	0	M	85	20.76	0	106	1	0	0	60	104	63	10.75	144	16	6766.9	5.25	59	1.99	92	0	1	4	2	0	1	0	0	1	0	3	0	1	40	36	31	53	30	0	0	96	0
1	0	0	0	0	0	M	66	27.44	0	126	5	0	0	70	110	80	7.5	333	0.258	1922.46	5.1	65	2.33	92	1	1	4	1	0	1	0	0	1	1	0	0	1	45	36	32	56	30	0	0	97	0
0	0	0	1	0	0	M	48	19.72	0	130	5	0	0	61	96	63	11.4	182	8.022	1339.79	9.17	28	2.68	92	1	1	5	1	0	0	0	0	1	0	1	1	0	49	33	30	57	28	0	0	54	0
0	0	0	1	0	0	M	67	20.76	1	117	0	0	0	98	120	80	5.93	265	1.223	11472.9	4.63	20	1.72	92	0	1	4	2	0	0	0	0	2	1	2	1	0	34	31	32	66	36	0	1	56	0
0	0	0	1	1	0	F	85	25.3	0	117	3	0	0	64	112	62	8.4	194	16	6466.61	6.8	20	2.76	93	0	1	5	2	0	0	0	0	1	1	0	0	1	71	30	25	40	24	0	1	69	0
1	0	0	0	1	0	F	76	15.82	0	104	5	0	0	88	104	90	12.09	177	16	3852.13	6.25	86	0.09	93	0	1	4	1	0	1	0	0	1	1	1	0	0	46	34	30	44	26	0	0	1	1
0	0	0	1	0	0	M	39	25.95	1	158	1	0	0	66	135	72	11.38	188	16	1024.5	5.28	46	2.1	93	0	1	4	1	0	0	0	0	0	0	1	1	1	65	31	29	45	30	0	0	78	0
0	0	0	1	0	0	M	70	24.22	0	138	5	0	0	90	136	88	10.16	229	14.62	1590.92	7.12	33	3.6	93	1	1	5	1	1	1	0	0	1	0	1	0	0	59	31	32	46	27	0	1	87	0
0	0	0	1	1	0	F	82	18.61	0	95	1	0	0	66	109	65	5.66	161	16	2841.72	6.66	47	3.88	93	0	1	5	2	0	0	0	0	1	0	1	0	0	50	27	30	47	21	0	0	86	0
0	0	0	1	0	0	M	54	27.76	1	150	5	0	0	87	119	76	8.5	193	0.393	1023.38	5.64	27	2.34	93	1	1	5	1	1	0	0	0	1	0	0	0	0	49	35	35	48	30	0	1	56	0
1	0	0	0	0	0	F	63	22.07	0	95	7	0	0	82	208	106	5.74	183	0.787	846.6	5.5	14	1.14	93	1	1	5	1	1	1	1	0	1	0	0	0	0	54	33	30	49	29	0	1	66	0
0	0	0	1	0	0	M	82	26.3	1	135	3	1	0	72	120	72	8.28	110	16	1762.71	6.9	52	2.57	93	0	1	5	1	0	1	0	0	0	0	0	0	0	54	33	30	49	29	0	1	80	0
0	0	0	1	0	0	F	55	30.8	0	122	5	0	0	92	99	63	13.02	228	5.042	3430.97	9.2	49	1.81	93	0	1	4	3	1	1	0	0	3	0	2	0	0	47	46	37	51	30	0	1	71	0
0	0	0	0	1	0	M	54	29.38	1	155	5	0	0	88	125	76	7.83	308	0.037	1163.8	4.9	62	2.68	93	1	1	4	1	0	0	0	0	0	1	1	0	0	43	32	27	52	30	0	1	69	0
1	0	0	0	1	0	M	46	26.83	1	118	7	0	0	65	150	102	11.94	402	1.071	9086.12	6.64	66	1.86	93	1	1	4	1	0	1	0	0	0	0	0	0	1	64	32	30	52	32	0	0	28	1
1	0	0	0	0	1	M	47	27.55	1	158	1	0	0	70	108	80	12.37	256	4.808	173.99	6.71	28	5.24	93	1	1	4	1	0	1	0	0	1	0	0	0	0	60	35	32	53	34	0	0	90	0
1	0	0	0	0	0	M	69	27.04	1	144	4	0	0	83	158	90	7.97	185	0.897	476.61	6.96	18	2.35	93	1	1	4	1	1	1	0	0	0	0	1	0	1	57	36	30	53	30	0	1	52	0
1	0	0	0	1	0	M	61	23.18	1	138	5	0	0	63	109	79	8.63	258	0.001	1374.59	4.84	10	2.45	93	1	1	4	1	0	0	0	0	1	0	1	0	1	73	31	30	53	33	0	1	75	0
0	0	0	1	0	0	M	65	22.04	1	119	5	0	0	103	140	96	7.23	205	3.697	5219.02	9.12	27	2.45	93	0	1	4	1	1	1	0	0	3	0	0	0	0	33	41	31	57	29	0	1	59	1
1	0	0	0	1	0	M	67	27.99	1	118	0	0	0	98	116	72	11.94	402	1.071	9086.12	5.51	66	1.86	93	0	1	4	4	0	1	0	0	1	1	2	1	0	33	40	40	62	40	0	0	8	1
0	0	0	1	1	0	M	62	20.2	1	124	5	0	0	80	120	78	7.23	291	0.169	1303.09	4.84	17	2.11	94	1	1	4	1	0	0	0	0	1	0	2	0	0	72	22	25	33	25	0	0	48	0
0	0	0	1	0	0	M	61	26.03	0	157	7	0	0	96	146	88	10.59	223	10.498	133.33	10.16	51	2.29	94	0	1	5	1	0	1	0	0	1	0	1	0	1	70	31	26	34	27	0	0	78	0
1	0	0	0	1	0	M	60	19.63	1	112	1	0	0	66	83	54	5.43	184	16	1869.71	6.63	45	2.51	94	1	1	4	4	0	0	0	0	0	0	1	0	0	53	24	27	43	28	0	0	63	0
0	0	0	1	1	0	M	61	24.02	0	143	5	0	0	83	127	85	7.29	194	2.582	611.69	5.68	12	2.99	94	1	1	4	1	0	0	0	0	1	0	0	0	1	69	28	29	44	28	0	1	74	0
0	0	0	1	0	0	M	62	22.77	1	142	5	1	0	87	151	79	7.37	218	1.306	2638.76	5.17	22	2.08	94	1	1	5	1	0	0	0	0	1	0	0	0	1	61	32	29	44	26	0	1	46	0
0	0	0	1	0	0	F	67	24.97	0	104	1	0	0	59	124	78	6.03	226	0.595	794.27	5.11	23	5.5	94	1	1	4	1	0	0	0	0	1	0	1	0	1	65	32	34	45	34	0	1	50	0
1	0	0	0	0	0	M	53	32.03	1	152	1	0	0	55	146	92	8.78	173	11.637	1048.08	5.57	50	2.27	94	0	1	5	1	0	0	0	0	0	0	1	0	1	69	33	31	45	33	0	0	54	0
0	0	0	1	0	0	M	50	25.1	0	147	5	0	0	62	133	78	11.27	186	4.891	1049.83	8.38	35	1.52	94	1	1	5	1	1	1	0	0	0	0	1	0	1	53	31	26	46	27	0	0	53	0
1	0	0	0	1	0	M	59	22.46	0	110	7	0	0	78	130	80	7.1	301	0.338	2105.02	7.06	65	2.35	94	0	1	4	1	1	1	0	0	1	0	0	0	1	63	31	33	46	27	0	0	80	0
0	0	0	1	1	0	M	44	25.97	1	119	5	0	0	70	120	80	9.83	220	0.001	259.58	5.55	90	1.05	94	1	1	4	1	1	1	1	0	1	1	0	0	1	58	33	29	47	28	0	0	57	0
1	0	0	0	0	0	M	61	21.84	1	133	4	0	0	89	145	99	7.46	278	0.048	612.05	4.66	14	2.11	94	0	1	4	1	0	1	0	0	1	0	1	0	1	68	27	30	47	29	0	0	45	0
1	0	0	0	0	0	M	45	25.35	1	134	1	0	0	61	124	82	13.28	231	15.433	70	6.25	56	2.32	94	0	1	5	1	0	1	0	0	1	0	0	0	0	54	33	30	49	29	0	0	1	1
0	0	0	1	1	0	M	39	32.05	1	163	5	0	0	70	120	80	9.9	295	0.001	116.19	5.78	102	2.01	94	0	1	4	1	1	1	0	0	1	0	0	0	0	54	33	30	49	29	0	0	73	0
0	0	0	1	0	0	M	66	22.91	1	141	1	0	0	43	96	60	7.75	305	4.686	330.4	5.29	18	3.19	94	1	1	4	1	0	0	0	0	1	0	0	0	0	54	33	30	49	29	0	0	95	0
1	0	0	0	1	0	M	81	29.07	0	124	5	0	0	75	124	70	12.7	213	16	908.11	5.81	18	2.52	94	1	1	5	1	0	1	0	0	1	0	0	0	0	54	33	30	49	29	0	0	76	0
0	0	0	1	0	0	M	73	28.47	1	127	5	0	0	54	130	68	7.57	229	3.87	915.21	5.16	21	2.27	94	0	1	4	1	0	1	0	0	0	1	0	1	0	74	33	32	49	29	0	1	12	1
1	0	0	0	0	0	M	59	21.01	1	146	5	0	0	68	128	75	13.63	281	14.558	2037.95	5.68	49	3.16	94	1	1	4	1	0	1	0	0	1	0	1	0	0	48	35	30	49	30	0	0	62	0
0	0	0	1	0	0	M	65	23.71	1	144	5	0	0	76	150	94	7.91	253	1.006	2638.76	4.42	20	2.98	94	1	1	7	1	0	0	0	0	1	0	0	0	0	54	33	30	49	29	0	0	84	0
0	0	0	1	0	0	F	67	21.44	0	138	7	0	0	71	134	80	8.79	302	16	2638.76	5.84	29	3.21	94	1	1	4	1	0	1	0	0	1	0	0	0	0	54	33	30	49	29	0	0	83	0
1	0	0	0	1	0	M	66	25.24	1	118	3	0	0	80	129	80	8.2	212	14.16	3806.04	6.84	53	1.79	94	0	1	4	1	0	1	0	0	1	0	0	0	0	54	33	30	49	29	0	1	67	0
1	0	0	0	1	0	F	80	17.67	0	98	7	0	0	94	172	98	6.22	196	16	9542.54	7.1	49	1.75	94	0	1	4	2	0	1	0	0	1	0	0	0	0	54	33	30	49	29	0	0	102	0
0	0	0	1	1	0	M	50	21.05	1	171	7	0	0	66	138	90	9.28	150	13.949	1554.26	4.48	46	1.86	94	1	1	4	1	0	1	0	0	0	1	0	0	0	47	32	28	52	31	0	1	55	0
0	0	0	1	1	0	M	61	28.93	1	163	0	0	0	84	128	100	23.06	245	10.209	5981.74	9.56	95	3.86	94	0	0	0	4	0	1	1	0	0	0	0	0	0	51	34	29	52	30	0	0	1	1
0	0	0	1	0	0	M	58	22.49	1	156	7	0	0	54	182	118	6.19	243	0.001	309.24	5.53	19	3.51	94	1	1	4	1	0	1	0	0	0	0	0	0	1	54	33	32	55	32	0	0	98	0
0	0	0	1	1	0	F	66	22.89	0	126	5	0	0	68	120	80	7.38	151	16	4174.46	14.44	29	2.52	94	1	1	4	1	1	1	0	0	2	1	1	0	0	34	38	34	56	32	0	1	54	0
0	0	0	1	0	0	M	62	24.92	0	145	7	0	0	56	136	79	10.94	198	9.121	5995.6	5.41	33	3.25	95	1	1	5	1	0	1	0	0	1	1	0	1	1	67	34	32	42	28	0	1	63	0
1	0	0	0	0	0	F	76	23.21	0	124	5	0	0	59	130	80	8.15	289	0.94	1117.3	5.62	27	3.75	95	0	1	4	2	0	0	0	0	0	1	0	0	0	61	28	26	44	22	0	1	72	0
0	0	0	1	0	0	F	85	22.48	1	115	7	0	0	72	152	72	5.97	229	16	1774.56	4.15	24	2.11	95	0	1	5	1	0	1	0	0	1	0	0	0	0	54	33	30	49	29	0	0	82	0
0	0	0	1	1	0	M	60	21.26	1	148	5	0	0	72	128	76	10.19	179	16	2546.58	5.9	40	3.92	95	0	1	5	1	0	1	0	0	1	0	0	0	0	54	33	30	49	29	0	0	44	0
0	0	0	0	0	0	M	60	28.77	1	142	5	0	0	65	120	78	13.37	168	16	2638.76	5.13	53	2.27	95	0	1	4	2	0	0	1	0	1	0	0	0	0	65	34	32	49	29	0	0	83	0
0	0	0	1	0	1	M	66	21.16	1	161	3	0	0	109	90	42	15.91	214	9.469	566.75	9.17	82	5.68	95	1	1	5	4	0	0	0	0	0	0	0	0	1	54	40	31	50	28	0	1	62	0
0	0	0	1	1	0	M	71	24.01	1	133	3	0	0	88	98	59	4.98	131	6.824	4556.73	5.01	55	1.93	95	1	1	4	1	0	0	0	0	1	0	1	0	0	39	33	30	50	30	0	0	87	0
0	0	0	1	0	0	M	49	30.69	1	149	7	0	0	86	140	112	8.67	182	0.621	720.87	5.41	30	1.51	95	1	1	4	1	1	1	0	0	1	0	1	0	1	66	40	34	52	33	0	0	48	0
0	0	0	1	0	0	M	45	26.78	1	144	5	0	0	78	152	92	9.28	190	6.658	169.99	6.77	43	3.26	95	1	1	5	1	0	0	1	0	0	0	0	0	1	52	35	34	54	35	0	1	52	0
0	0	0	1	0	0	M	43	28.2	1	136	4	0	0	70	118	82	17.24	195	16	208.41	4.77	44	3.14	95	0	1	4	1	0	0	0	0	1	0	0	0	1	58	33	25	54	30	0	1	98	0
0	0	0	1	0	0	M	45	25.56	1	124	5	0	0	70	115	71	6.76	235	13.409	1443.29	4.35	37	2.83	95	1	1	4	2	0	1	0	0	1	0	0	1	0	59	33	33	54	32	0	1	52	0
0	0	0	1	1	0	M	68	19.71	1	113	5	0	0	77	110	66	6.91	400	0.317	12637.2	4.67	45	2.19	95	1	1	4	2	1	1	0	0	1	0	1	0	0	32	36	35	55	32	0	1	64	0
1	0	0	0	0	0	M	33	23.03	0	148	5	0	0	66	100	70	6.67	257	0.463	1072.28	4.68	79	1.67	95	1	1	4	1	0	0	0	0	1	0	0	0	1	56	32	35	56	35	0	0	64	0
0	0	0	1	1	0	M	52	27.13	1	151	7	0	0	60	136	86	8.38	195	16	559.77	3.91	32	3.89	95	0	1	5	1	0	1	0	0	1	1	0	0	0	57	33	29	59	30	0	0	78	0
0	0	0	1	1	1	M	84	25.43	0	126	0	0	0	84	143	87	6.2	158	13.357	2962.35	11.36	20	3.7	95	0	1	4	1	1	1	1	0	1	1	0	0	0	38	36	41	59	29	0	0	1	1
0	0	0	1	0	0	M	55	25.34	1	149	5	0	0	84	141	75	8.64	299	1.032	680.68	5.49	18	1.92	96	1	1	5	2	0	1	0	0	0	0	0	0	1	73	30	26	44	25	0	0	53	0
0	0	0	1	0	0	M	71	25.01	1	124	5	0	0	85	150	74	7.08	152	16	232	9.59	20	2.37	96	1	1	5	1	1	1	1	0	0	0	0	0	0	70	31	30	46	30	0	0	80	0
1	0	0	0	0	0	M	66	25.99	1	96	5	0	0	90	137	80	8.45	306	7.337	3762.34	13.66	54	1.31	96	1	1	5	3	1	1	0	0	1	1	1	1	0	46	40	30	46	26	0	1	55	0
0	0	0	1	0	0	M	61	28.04	1	120	3	1	0	70	107	72	10.84	170	10.127	473	6.7	63	2.29	96	1	1	4	4	0	1	0	0	0	1	0	0	0	50	34	33	47	30	0	1	67	1
0	0	0	1	0	0	M	67	24.34	1	129	5	0	0	69	143	91	5.61	135	0.262	558.58	5.38	113	2.39	96	1	1	5	1	0	1	0	0	1	1	0	0	1	57	31	35	47	28	0	1	49	0
1	0	0	0	0	0	M	60	28.69	1	165	5	0	0	88	106	56	11.47	256	2.356	148.48	6.72	42	4.47	96	1	1	4	1	0	0	0	0	0	0	0	0	1	58	32	35	48	32	0	0	50	0
1	0	0	0	0	0	M	35	32.74	1	126	5	0	0	82	120	80	9.28	217	5.437	592.76	5.61	30	6.55	96	1	1	4	1	0	0	0	0	1	0	1	0	0	58	34	30	48	31	0	1	62	0
0	0	0	1	0	0	M	51	26.3	0	139	5	0	0	67	120	60	18.4	125	16	1287.09	6.42	41	2.79	96	1	1	4	1	0	0	0	0	1	0	0	0	0	54	33	30	49	29	0	1	101	0
0	0	0	1	1	0	M	51	23.15	0	150	5	1	0	58	103	61	8.02	238	0.473	2252.62	3.93	45	7.02	96	1	1	4	1	0	0	0	0	1	0	0	0	0	54	33	30	49	29	0	1	51	0
0	0	0	1	1	0	M	62	17.72	1	130	0	1	0	68	123	80	11.48	195	11.52	4359.28	4.85	70	2.2	96	0	1	5	3	0	0	0	0	1	0	0	0	0	54	33	30	49	29	0	1	75	0
0	0	0	1	1	0	M	74	20.31	1	133	4	0	1	80	150	80	11.19	136	16	4548.1	5.58	46	0.91	96	0	1	2	2	0	1	0	0	1	0	0	0	0	54	33	30	49	29	0	0	59	1
1	0	0	0	0	0	M	64	23.44	1	123	1	0	0	80	120	80	6.82	152	0.623	5108.37	5.18	9	1.88	96	0	1	4	2	0	0	0	0	1	1	1	0	0	74	35	25	49	26	0	0	1	1
1	0	0	0	0	0	M	78	21.05	1	111	4	1	0	90	140	100	9.54	277	1.119	11244.5	4.25	19	2.96	96	0	1	4	2	0	1	1	0	1	0	0	0	0	54	33	30	49	29	0	1	55	0
0	0	0	1	1	0	M	55	28.67	1	163	7	0	0	76	120	80	12.44	228	1.573	230.48	4.48	60	2.59	96	1	1	4	1	0	1	0	0	0	0	0	0	1	75	33	30	51	28	0	1	70	0
0	0	0	1	0	0	M	76	23.88	1	123	7	0	0	70	144	76	8.65	170	16	479.11	6.16	30	2.52	96	0	1	5	1	0	1	0	0	1	0	0	0	0	52	36	34	52	31	0	0	54	0
0	0	0	1	1	0	M	65	22.32	1	129	5	0	0	60	144	78	4.42	247	4.469	1080.44	3.6	25	1.73	96	1	1	5	1	0	1	1	0	2	1	1	0	0	43	37	30	52	27	0	1	49	0
0	0	0	1	1	1	M	58	24.22	0	142	7	1	0	86	155	91	6.6	370	9.898	861.1	5.87	26	2.21	96	0	1	5	2	0	1	1	0	1	0	0	0	1	60	36	32	54	29	0	1	55	0
0	1	0	1	0	0	M	68	23.44	1	133	5	0	0	69	128	66	9.82	154	10.951	3476.16	8.78	20	2.37	97	1	1	5	2	1	0	0	0	0	0	0	0	1	64	24	27	40	26	0	0	62	0
0	0	0	1	0	0	M	78	19.83	1	128	5	0	0	78	147	74	7.35	199	16	4477.42	4.54	45	3.13	97	1	1	5	2	0	1	0	0	1	0	1	0	0	40	38	39	47	26	0	1	46	0
0	0	0	1	0	1	M	60	26.03	0	133	3	1	0	98	112	69	10.02	257	5.97	443.65	6.7	69	1.27	97	1	1	5	1	1	1	0	0	1	0	0	1	0	49	28	35	48	31	0	0	53	0
0	0	0	1	0	0	F	73	24.97	0	112	7	1	0	98	166	78	7.79	197	8.327	9300.83	9.68	33	3.22	97	1	1	7	3	1	1	0	0	0	2	0	0	1	64	31	27	48	21	0	1	66	0
0	0	0	1	1	0	M	71	30.74	0	144	5	0	0	64	150	100	8.57	181	16	1105.14	5.8	49	2.94	97	0	1	5	1	0	1	0	0	1	0	0	0	0	54	33	30	49	29	0	0	77	0
0	0	0	1	0	0	M	56	20.76	1	135	1	0	0	74	146	90	9.44	235	10.757	2638.76	4.92	14	1.99	97	0	1	5	1	0	0	0	0	1	0	0	0	0	54	33	30	49	29	0	0	79	0
0	0	0	1	0	0	F	80	25.07	0	118	5	0	0	78	120	82	11.65	199	16	6186.22	7.08	36	2.05	97	0	1	7	2	0	1	0	0	1	0	0	0	0	54	33	30	49	29	0	0	65	0
0	0	0	1	1	0	F	69	23.19	0	99	0	0	0	72	123	76	8.48	168	13.526	8886.98	11.9	228	3.77	97	0	1	5	3	1	1	0	0	1	0	0	0	0	54	33	30	49	29	0	0	1	1
1	0	0	0	0	0	M	51	19.03	1	152	1	0	0	54	120	88	8.41	264	0.01	235.88	6.18	30	1.82	97	1	1	5	1	0	1	0	0	0	0	0	0	1	54	33	32	53	34	0	0	64	0
0	0	0	1	0	0	M	45	25.99	1	155	7	0	0	70	180	90	6.63	203	15.679	304	6.98	34	2.6	97	1	1	4	1	1	1	0	0	0	0	0	0	1	53	38	34	53	35	0	0	46	0
1	0	0	0	1	0	M	61	23.84	1	118	5	0	0	80	130	62	8.89	182	16	1178.19	5.44	21	2.25	97	0	1	5	1	1	1	1	0	1	0	1	0	0	53	37	29	54	28	0	1	20	1
1	0	0	0	0	0	F	58	25.22	0	124	3	0	0	64	98	66	5.19	224	0.125	2751.06	5.92	27	2.4	97	1	1	4	3	0	1	1	1	3	0	2	0	0	47	38	30	55	30	0	1	11	1
1	0	0	0	1	0	M	65	20.57	0	136	5	0	0	76	124	82	9.42	177	12.231	2885.05	11.06	20	2.91	97	1	1	4	1	1	0	0	0	1	1	0	0	0	47	36	29	55	22	0	0	95	0
0	0	0	1	1	0	F	68	21.91	1	103	5	0	0	92	116	80	6.45	113	3.435	5519.72	8.3	22	2.01	97	0	1	5	1	1	1	0	0	2	0	0	0	0	30	38	30	55	30	0	1
0	0	0	1	0	0	M	73	25.1	0	118	1	1	0	92	108	75	11.47	263	16	15000	7.61	24	2.17	97	1	1	4	1	0	1	0	0	0	1	0	1	0	33	31	30	55	27	0	1	46	0
0	0	0	1	1	0	M	72	23.39	0	117	7	1	0	82	134	78	9.1	154	5.19	3723.97	6.44	45	2.82	97	1	1	4	1	1	0	0	0	0	3	0	0	1	41	40	32	56	29	0	1	102	0
1	0	0	0	0	0	M	36	25.5	1	142	7	0	0	72	134	78	11.63	308	0.041	2638.76	5.8	18	2.27	97	1	1	4	1	0	1	0	0	0	0	0	0	0	38	44	33	70	32	0	0	66	0
1	0	0	0	1	0	M	59	28.04	1	165	5	0	0	105	113	79	11.88	137	1.684	2900.4	7.11	53	1.78	97	1	1	5	1	0	1	0	0	1	0	1	0	0	36	40	32	72	33	0	0	53	0
0	0	0	1	1	0	M	70	17.01	1	115	5	0	0	80	141	80	9.09	182	8.05	4822.37	4.89	47	1.36	98	1	1	4	1	0	1	0	0	0	0	1	1	1	43	28	26	42	28	0	0	58	0
1	0	0	0	1	0	F	75	29.24	0	95	3	0	0	74	145	83	7.6	245	6.298	4532.28	9.9	14	3.31	98	1	1	4	1	1	1	0	0	1	0	0	1	0	62	31	28	46	31	0	0	69	0
0	0	0	1	1	0	M	65	23.88	1	169	5	0	0	101	128	76	14.11	196	16	1943.77	7.57	45	2.52	98	1	1	4	1	0	0	0	0	1	1	0	0	0	40	28	28	47	30	0	0	45	0
1	0	0	0	0	0	M	76	26.3	1	142	7	0	0	58	126	78	10.56	164	0.001	233.87	4.91	25	2.24	98	1	1	4	1	0	1	0	0	1	0	0	0	0	54	33	30	49	29	0	0	90	1
1	0	0	0	1	0	M	72	24.68	0	129	5	0	0	66	149	68	6.31	153	5.794	682.22	4.58	49	2.5	98	1	1	5	1	0	1	0	0	1	0	0	0	0	54	33	30	49	29	0	1	74	0
0	0	0	1	0	0	M	74	24.61	0	121	5	0	0	83	162	90	1.04	265	2.5	801.37	7.16	40	3.35	98	0	1	4	1	0	1	0	0	1	0	0	0	0	54	33	30	49	29	0	0	70	0
0	0	0	0	0	1	F	76	23.83	0	113	5	0	0	62	151	82	8.6	209	6.074	1148.23	5.01	30	1.81	98	1	1	4	1	1	1	0	0	1	0	0	0	0	54	33	30	49	29	0	0	82	0
0	0	0	1	0	0	M	57	25.46	1	117	5	1	0	66	116	70	12.3	167	16	1948.81	15.91	38	3.51	98	1	1	4	1	1	0	0	0	1	0	0	0	0	54	33	30	49	29	0	1	89	0
0	0	0	1	1	0	M	80	24.22	1	141	5	0	0	104	140	80	9.34	208	3.247	2789.57	6.38	23	3.64	98	0	1	5	1	0	1	1	0	1	0	0	0	0	54	33	30	49	29	0	0	68	0
1	0	0	0	1	0	M	84	23.66	0	108	1	0	0	63	98	57	6.08	117	1.823	5642.76	6.12	21	2	98	1	1	7	1	0	0	0	0	1	0	0	0	0	54	33	30	49	29	0	1	51	0
0	0	0	1	1	0	M	72	23.67	0	130	5	0	0	103	141	88	7.6	255	0.049	6550	4.86	26	2.21	98	0	1	0	1	0	1	1	0	1	0	0	0	0	54	33	30	49	29	0	0	70	0
0	0	0	1	0	0	M	62	20.38	1	118	5	0	0	80	145	70	8.67	275	0.001	542.79	4.93	34	2.35	98	1	1	4	1	0	1	0	0	1	0	1	0	1	66	28	31	50	28	0	0	97	0
0	0	0	1	1	1	M	58	27.34	1	153	5	0	0	83	145	94	14.96	266	10.145	2638.76	5.8	71	3.64	99	1	1	5	1	0	0	0	0	0	0	0	0	1	55	34	26	44	27	0	0	73	0
1	0	0	0	0	0	M	45	25.95	1	142	7	0	0	81	160	90	10.89	319	5.269	123.56	10.13	20	2.83	99	0	1	5	1	1	1	0	1	0	1	0	0	1	61	35	32	46	32	0	0	80	0
0	0	0	1	1	0	M	23	37.98	1	159	5	0	0	76	114	70	17.03	295	5.776	277.02	5.03	105	3.55	99	1	1	4	1	0	0	0	0	0	0	0	0	1	43	31	31	46	28	0	0	97	0
0	0	0	1	0	0	M	83	19.03	1	96	5	0	0	66	157	73	6.16	172	16	1113.02	5.27	22	2.37	99	0	1	4	1	0	1	1	0	1	0	0	0	1	61	29	27	46	22	0	0	74	0
0	0	0	1	0	0	M	63	19.43	1	138	5	0	0	57	120	72	4.7	267	2.999	1430.27	5.54	19	2.09	99	0	1	4	1	0	0	0	0	1	0	0	0	0	72	30	29	47	28	0	0	74	0
0	0	0	1	0	0	M	75	22.31	0	154	5	0	0	82	106	64	11.3	187	16	1525.45	5.23	33	2.25	99	1	1	4	1	0	1	1	0	1	1	0	0	1	54	35	29	48	29	0	1	49	0
0	0	0	1	1	0	M	61	27.04	1	155	5	0	0	66	104	68	9.26	193	14.944	936.02	5.74	41	2.67	99	0	1	5	1	0	1	0	0	1	0	0	0	0	54	33	30	49	29	0	0	77	0
0	0	0	1	0	0	F	50	25.56	0	117	5	0	0	65	108	73	14.76	187	9.939	1638.24	5.17	41	2.55	99	0	1	4	1	1	1	0	0	0	0	0	0	0	54	33	30	49	29	0	0	75	0
1	0	0	0	0	0	M	62	22.77	1	111	1	0	0	87	103	72	7.01	133	11.943	1913.83	5.19	47	2.39	99	0	1	5	1	0	0	0	0	1	1	0	0	0	43	34	30	49	34	0	1	23	1
1	0	0	0	1	0	M	75	21.83	1	120	1	0	0	60	110	64	7.25	266	7.763	4088.76	4.71	20	1.37	99	1	1	7	1	0	1	1	0	1	0	0	0	0	54	33	30	49	29	0	0	46	0
0	0	0	1	1	0	M	85	24.44	1	112	5	0	0	90	98	52	6.93	144	16	8102.16	13.91	109	2.47	99	0	1	5	4	1	1	0	0	1	0	0	0	0	54	33	30	49	29	0	0	1	1
0	0	0	1	1	0	F	75	23.44	1	98	3	0	0	82	94	51	8.69	240	13	10800	6.7	16	4.45	99	0	1	5	4	0	0	0	0	1	0	0	0	0	54	33	30	49	29	0	0	75	0
0	0	1	0	0	1	F	76	23.11	0	127	6	0	0	98	154	90	8.95	351	16	12919.7	9.3	12	3.83	99	0	1	4	2	1	1	0	0	1	0	0	0	0	54	33	30	49	29	0	0	5	1
1	0	0	0	0	0	M	77	28.89	1	122	0	1	0	54	126	70	6.61	193	0.036	450.5	4.99	20	1.87	99	0	1	5	1	1	1	0	0	1	0	0	0	1	62	39	35	50	32	0	1	54	0
1	0	0	0	0	0	M	69	22.86	0	120	5	0	0	92	92	50	7.23	156	16	688.23	8.45	63	2.65	99	1	1	4	1	0	0	0	0	1	2	0	0	1	61	36	29	50	26	0	1	99	0
1	0	0	0	0	0	M	66	25.21	0	144	5	0	0	74	110	70	9.07	250	0.787	1508.22	5.79	17	2.01	99	0	1	5	1	1	1	0	0	1	2	1	1	1	77	31	28	51	29	0	0	34	1
0	0	0	1	1	0	M	66	24.61	1	121	0	0	0	77	82	57	8.81	109	11.235	6373.94	9.11	79	1	99	1	1	7	4	0	0	0	0	0	0	0	0	0	43	37	29	51	28	0	0	61	0
0	0	0	1	1	0	M	73	25.53	1	140	7	0	0	102	164	74	8.54	169	0.239	5648.38	12.27	25	3.29	99	1	1	4	2	1	1	0	0	1	1	1	1	1	59	29	34	52	28	0	0	66	0
0	0	0	1	0	0	M	66	21.05	1	125	5	0	0	59	108	80	11.15	330	1.828	470.61	3.98	31	3.58	99	0	1	4	1	0	0	0	0	0	0	0	1	1	50	30	34	54	30	0	0	97	0
0	0	0	1	0	0	M	69	21.48	1	127	1	0	0	63	114	68	8.43	243	0.201	2649.08	5.19	23	4.4	99	1	1	4	2	0	0	0	0	2	1	1	1	0	48	34	23	55	27	0	1	56	0
0	0	0	0	0	0	M	58	25.18	1	133	2	0	0	70	110	70	7.81	211	3.7	1000.47	6.51	19	2.11	99	0	1	5	1	1	0	0	0	1	1	0	0	0	44	36	35	56	33	0	1	53	1
1	0	0	0	0	0	F	66	20.31	0	97	5	0	0	78	110	75	13.35	323	2.323	313.52	12.8	70	3.1	100	1	1	4	2	1	0	0	0	0	0	0	0	0	60	31	25	41	26	0	1	68	0
1	0	0	0	0	0	F	66	24.97	0	115	5	1	0	65	134	85	7.94	173	9.04	1200.49	4.38	45	2.17	100	0	1	4	1	0	1	0	0	1	0	0	1	0	61	28	30	41	27	0	1	60	0
1	0	0	0	1	0	M	73	19.53	0	93	5	1	0	92	132	84	8.98	176	16	8754.61	5.22	31	2.5	100	0	1	4	2	0	1	0	0	2	0	2	0	0	46	33	32	44	29	0	1	77	0
1	0	0	0	0	0	M	81	21.91	0	109	5	0	0	93	86	41	8.02	169	3.28	6409.04	6.97	131	1.46	100	0	1	5	2	0	0	0	0	1	1	1	0	0	43	33	34	45	34	0	0	57	0
1	0	0	0	1	0	M	52	24.22	0	120	5	0	0	64	138	80	5.62	314	7.484	3020.81	6.23	96	1.82	100	0	1	7	1	1	1	0	0	0	0	0	0	0	71	35	23	46	28	0	0	85	0
1	0	0	0	1	1	M	68	20.95	1	144	1	0	0	78	92	54	9.94	159	7.041	395.74	7.83	95	1.82	100	1	1	5	1	0	0	0	0	1	0	1	0	0	45	32	29	47	27	0	1	57	0
0	0	0	1	1	0	M	79	28.76	0	136	5	1	0	65	130	80	4.94	133	0.224	458.77	5.58	23	2.46	100	1	1	4	1	0	1	0	0	0	0	0	0	0	58	28	33	47	29	0	1	72	0
1	0	0	0	0	1	M	43	26.73	1	164	5	0	0	66	96	72	12.58	127	10.252	369.72	6.96	19	2.77	100	0	1	4	1	0	0	0	0	0	0	0	0	0	69	32	31	48	28	0	0	98	0
0	0	0	1	0	0	F	76	21.56	0	113	5	0	0	98	110	65	6.99	193	0.27	7664.03	4.42	43	2.64	100	0	1	4	2	0	0	1	0	2	1	1	0	0	40	36	33	48	32	0	1	51	0
1	0	0	0	0	0	M	58	23.88	1	157	3	0	0	60	108	66	5.44	177	0.658	549.25	5.94	108	2.23	100	1	1	7	1	1	0	0	0	1	0	0	0	0	54	33	30	49	29	0	1	73	0
0	0	0	0	1	0	M	75	28.04	1	135	5	0	0	138	138	78	6.59	284	1.5	822	6.7	95	2.49	100	0	1	5	2	0	1	1	0	1	0	0	0	0	54	33	30	49	29	0	0	4	1
0	0	0	1	0	0	M	67	27.28	0	159	5	0	0	76	159	89	7.08	241	0.461	959.99	5.5	20	3.28	100	0	1	4	1	1	1	1	0	1	0	0	0	0	54	33	30	49	29	0	1	76	0
0	0	0	1	0	0	M	70	27.68	0	130	1	0	0	62	132	60	12.6	106	16	2610.46	5.67	31	2.32	100	1	1	4	2	0	1	0	0	2	0	1	0	1	50	33	32	53	32	0	1	99	0
0	0	0	1	0	0	F	83	22.22	0	113	7	0	0	54	139	54	4.51	182	0.233	11723.1	4.71	6	2.26	100	1	1	4	3	1	1	0	0	2	0	0	0	0	42	41	28	53	26	0	0	19	1
1	0	0	0	0	0	M	61	21.61	1	106	5	1	0	62	162	94	9.31	176	15.772	570.14	7.34	45	2.45	100	1	1	5	1	0	1	0	0	0	0	0	0	0	64	40	29	54	30	0	1	73	0
0	0	0	1	0	0	M	74	23.03	0	179	5	1	0	72	144	82	8.43	165	3.6	2484.04	5.65	30	1.54	100	0	1	4	1	0	1	0	0	1	1	1	0	1	55	30	30	55	28	0	1	98	0
1	0	0	0	0	1	M	74	20.55	1	117	7	1	0	120	158	96	5.6	114	0.18	5786.63	3.5	30	2.82	100	1	1	4	2	1	1	0	0	0	0	1	0	1	33	47	38	61	35	0	1	59	1
1	0	0	0	1	0	M	75	19.59	0	118	3	0	0	68	75	49	7.02	111	12.728	3867.38	5.18	81	3.76	100	1	1	5	4	0	0	0	0	2	1	0	0	0	33	40	29	62	29	0	1	50	0
0	0	0	1	0	0	M	58	20.43	1	141	3	0	0	80	102	65	5.36	301	0.267	1491.14	4.77	101	2.27	101	0	1	4	1	0	1	0	0	0	0	0	0	1	54	28	31	40	31	0	1	65	0
0	0	0	0	0	0	M	68	20.52	0	129	4	0	0	68	140	70	6.15	147	11.034	528.69	6.28	38	1.5	101	0	1	4	1	1	1	0	0	0	0	0	1	0	71	32	33	43	28	0	0	82	0
0	0	0	1	1	0	M	74	23.66	1	141	5	0	0	114	104	69	12.88	197	12.319	5455.3	6.02	64	2.81	101	1	1	5	1	0	0	1	0	1	0	0	0	0	54	33	30	49	29	0	1	68	0
0	0	0	0	0	1	F	86	23.94	0	140	4	0	0	83	186	100	14.3	194	16	6010.5	8.04	53	2.91	101	0	1	4	2	0	1	0	0	1	0	0	0	0	54	33	30	49	29	0	0	58	1
0	0	0	1	1	1	M	67	28.44	0	145	7	0	0	80	180	120	11.84	222	16	306.61	4.53	45	2.8	101	1	1	5	1	0	1	1	0	1	0	0	0	0	53	36	39	50	32	0	0	49	0
0	0	0	1	1	0	M	51	21.8	1	146	5	0	0	80	111	75	12.16	189	0.039	2426.49	4.82	49	4.96	101	0	1	4	2	0	0	0	0	1	0	1	0	0	30	34	34	54	33	0	0	41	1
0	0	0	1	0	0	M	67	24	1	135	7	0	0	87	200	90	11.3	134	9.568	2133.32	5.64	36	2.75	101	1	1	5	1	0	1	0	0	2	0	0	0	0	33	40	39	57	27	0	0	80	0
0	0	0	1	0	0	M	85	21.05	0	116	0	0	0	52	96	50	10.13	165	16	2822.88	5.51	37	1.85	101	0	1	4	1	0	1	0	0	1	0	1	1	1	66	37	31	60	30	0	0	57	1
0	0	0	1	0	1	F	69	20	0	117	5	0	0	86	104	66	10.64	113	0.876	7870.89	3.57	46	2.33	101	1	1	2	1	0	1	0	0	2	0	0	0	0	26	37	26	65	23	0	0
0	0	0	1	0	1	M	67	22.49	1	143	7	0	0	85	130	80	7.41	235	1.279	1281.61	5.41	20	1.04	102	1	1	4	1	0	0	1	0	0	0	0	1	0	54	40	26	41	29	0	0	68	0
0	0	0	1	0	0	M	88	16.12	1	147	5	0	0	90	120	90	8.86	212	6.238	9965.81	5.13	17	2.22	102	1	1	7	2	0	0	0	0	1	0	0	0	0	50	38	29	42	28	0	1	68	0
1	0	0	0	1	0	M	87	18.37	0	113	5	0	0	72	148	72	10.3	166	16	2598.18	4.18	45	2.17	102	0	1	4	1	0	1	0	0	1	0	0	0	1	66	35	33	44	33	0	0	100	0
0	0	0	1	1	0	M	77	25.95	1	146	5	0	0	77	117	60	7.84	153	15.336	4141.99	4.44	49	2.44	102	1	1	4	2	0	0	0	0	0	0	1	0	0	56	33	33	44	28	0	0	84	0
1	0	0	0	0	0	M	48	30.42	0	135	7	0	0	81	112	80	6.57	146	4.244	314.92	8.27	55	2.38	102	1	1	5	1	1	1	0	0	0	0	2	0	1	53	29	42	45	39	0	0	71	0
0	0	0	1	0	0	M	62	23.44	0	140	5	0	0	70	129	72	10.77	166	6.766	633.48	5.21	45	1.59	102	1	1	5	4	1	1	0	0	2	1	0	0	0	63	36	34	47	33	0	0	62	0
0	0	0	1	0	0	F	67	27.55	1	119	7	0	0	68	130	70	9.31	152	1.08	2988	5.25	28	2.73	102	1	1	4	3	0	1	0	0	1	0	0	0	1	53	34	33	47	29	0	0	60	1
0	0	0	1	0	1	M	43	26.45	1	156	5	0	0	80	152	114	11.11	166	16	55.77	11.09	80	1.97	102	0	1	5	1	1	1	0	0	1	0	0	0	0	54	33	30	49	29	0	0	78	0
0	0	0	1	1	0	M	56	28.34	1	136	5	0	0	71	113	70	6.52	201	8.26	1835.66	5.71	22	1.73	102	1	1	5	2	0	0	0	0	1	0	1	0	0	49	31	32	49	33	0	0	56	0
1	0	0	0	0	0	F	63	26.04	0	149	3	0	0	98	101	70	4.09	179	4.577	3645.23	5.45	16	2.98	102	1	1	4	4	0	1	0	0	1	0	0	0	0	54	33	30	49	29	0	1	76	0
0	0	0	1	1	0	M	75	27.53	1	125	5	0	0	70	120	80	9.19	175	6.245	8224.6	6.14	55	2.04	102	1	1	4	1	0	0	0	0	1	0	0	0	0	54	33	30	49	29	0	0	19	1
1	0	0	0	0	0	M	61	23.88	0	110	0	0	0	122	104	60	11.21	353	10.942	10971.6	16.11	37	2.39	102	0	1	4	4	1	0	0	0	0	0	0	0	0	36	35	34	49	31	0	0	1	1
1	0	0	0	0	0	M	74	20.76	1	300	1	0	0	46	96	52	13.38	212	16	520.54	4.65	47	1.26	102	0	1	4	1	1	1	0	0	1	0	1	1	1	59	30	34	50	27	0	0	70	1
1	0	0	0	0	0	M	72	18.88	1	133	0	1	0	63	94	58	13.86	286	16	4044.62	5.29	32	2.7	102	0	1	4	4	0	0	1	0	1	1	1	0	1	60	36	22	50	26	0	1	5	1
0	0	0	1	1	0	M	64	20.76	0	130	5	0	0	102	104	72	20.41	210	16	7509.39	4.26	85	1.5	102	0	1	4	3	0	1	0	1	0	1	1	0	0	42	28	29	50	27	0	0	4	1
1	0	0	0	0	0	M	82	20.55	0	106	1	1	0	100	135	84	3.49	122	1.157	3484	6.32	13	1.81	102	1	1	5	1	1	1	0	0	1	0	1	0	0	50	39	32	53	30	0	1	46	0
0	0	0	1	1	1	M	81	25.89	1	130	3	0	0	92	144	93	9.59	268	2.4	59.32	14.01	93	1.76	102	1	1	4	2	0	1	0	0	0	0	2	0	0	35	35	35	55	32	0	0	72	0
0	0	0	1	1	0	M	37	22.39	1	142	1	0	0	43	99	69	6.23	196	0.168	2867.73	4.77	26	2.09	102	1	1	4	1	0	0	0	0	1	0	2	0	0	45	37	37	59	31	0	1	62	0
1	0	0	0	1	0	M	75	22.84	1	160	5	0	0	80	106	70	5.91	175	7.633	4878.68	8.2	27	1.82	102	1	1	4	1	1	0	1	0	1	0	2	0	0	38	37	39	60	33	0	1	1	1
0	0	0	1	0	0	M	54	28.69	1	134	5	0	0	108	124	78	10.22	351	5.212	3085.15	4.3	25	3.65	102	0	1	5	2	0	0	0	0	2	3	0	0	0	28	38	35	63	40	0	1	79	0
1	0	0	0	0	0	F	79	23.01	0	106	5	0	0	59	135	61	6.06	171	0.565	8762.85	5.21	22	1.34	102	0	1	4	2	1	1	0	0	1	1	1	1	1	35	46	32	63	31	0	0	49	1
0	0	0	1	1	0	M	64	20.02	0	127	5	0	0	98	86	50	8.64	193	0.001	8981.87	7.26	18	2.57	102	1	1	4	1	0	0	1	0	1	1	1	1	0	39	42	31	67	27	0	0	5	1
1	0	0	0	1	0	M	47	27.43	0	140	5	0	0	72	130	88	6.2	237	3.41	2638.76	4.59	35	1.86	103	0	1	4	1	0	0	0	0	0	0	0	1	1	65	28	32	42	31	0	1	80	0
0	0	0	1	0	0	F	75	26.4	0	124	5	1	0	89	131	88	11.06	232	0.647	2638.76	11	19	1.84	103	1	1	7	1	1	1	1	0	1	0	0	0	1	67	32	28	45	3	0	1	46	0
0	0	0	1	0	0	M	70	25.65	1	146	7	1	0	72	120	70	8.21	291	0.029	203.08	5.6	15	4	103	0	1	5	1	0	1	0	0	0	0	0	0	0	59	33	31	48	29	0	1	77	0
0	0	0	1	0	0	M	60	25.04	1	130	1	0	0	66	125	70	6.28	149	2.355	2638.76	5.41	54	2.94	103	0	1	4	1	0	0	0	0	1	0	0	0	0	54	33	30	49	29	0	0	82	0
1	0	0	0	0	0	M	50	24.05	1	175	5	0	0	100	126	84	14.5	245	8.796	529.08	5.51	39	1.99	103	1	1	5	1	1	0	0	0	1	0	1	0	1	69	30	28	50	30	0	0	75	0
0	0	1	0	0	0	M	81	20.2	0	124	3	0	0	70	137	79	5.66	106	11.25	6053.74	6.05	30	1.72	103	0	1	4	1	0	1	0	0	1	1	1	1	0	35	27	31	50	31	0	0	49	1
1	0	0	0	0	0	M	53	24.22	1	136	5	0	0	140	189	110	22.4	179	0.913	3361.99	6.69	26	2.67	103	0	1	7	3	1	1	0	0	1	0	0	0	0	45	36	33	52	31	0	1	56	0
0	0	0	1	0	0	M	78	21.76	1	69	5	1	0	75	111	56	5.19	212	0.001	6397.15	5.43	10	1.28	103	1	1	4	2	0	0	0	0	1	0	1	0	0	32	30	35	53	32	0	1	26	1
1	0	0	0	1	1	M	57	28.34	1	142	5	0	0	82	136	78	25.63	223	16	4003.28	5.75	89	2.19	103	1	1	4	1	0	0	0	0	0	0	0	0	0	46	34	30	54	32	0	0	96	0
0	0	0	1	0	0	M	74	25.65	1	148	5	0	0	57	117	70	8.39	240	10.865	712.71	6.86	31	2.09	103	0	1	4	2	0	0	1	0	1	0	0	0	1	57	34	34	55	34	0	0	52	0
0	0	0	1	0	0	F	72	21.64	1	111	5	0	0	63	103	56	9.77	237	16	2083.59	5.62	51	1.22	104	0	1	4	1	0	0	0	0	1	0	1	1	0	49	27	26	40	33	0	1	59	0
0	0	0	1	1	0	M	61	21.42	1	135	3	1	0	69	96	57	10.08	273	0.083	5526.1	5.04	23	2.77	104	1	1	5	1	0	0	0	0	1	1	1	1	0	40	32	30	45	25	0	1	64	0
1	0	0	0	0	0	M	70	20.2	1	104	1	0	0	57	138	80	6.25	158	16	1085.2	4.31	34	2.79	104	0	1	4	1	0	1	0	0	1	0	1	0	1	64	30	31	46	33	0	0	57	1
0	0	0	1	1	0	M	60	25.01	0	152	0	0	0	122	166	104	19.23	144	15.662	2792.64	9.77	258	1.37	104	1	1	5	4	0	0	0	1	0	0	0	0	0	58	38	28	48	22	0	1	1	1
1	0	0	0	0	0	M	56	27.75	1	143	0	0	0	92	151	84	7.41	167	2.261	458.06	5.25	32	2.52	104	1	1	4	1	0	1	0	0	0	0	0	0	0	60	34	35	49	33	0	0	61	0
0	0	0	1	0	0	M	75	18.73	0	122	5	0	0	135	105	77	14.89	157	5.472	9472.86	7.42	29	2.53	104	0	1	2	3	0	1	0	0	1	0	0	0	0	54	33	30	49	29	0	1	99	0
1	0	0	0	1	0	M	66	25.39	0	125	4	0	0	68	94	74	9.13	120	16	1489.89	7.33	80	1.85	104	0	1	4	2	0	1	0	0	0	0	0	0	0	52	24	28	50	25	0	0	85	0
0	0	0	1	1	0	M	71	23.09	1	95	5	0	0	64	131	62	6.48	463	0.51	3915.44	5.44	18	1.68	104	1	1	4	1	0	0	0	0	0	1	0	1	0	50	30	29	50	26	0	0	68	0
0	0	0	1	1	1	M	57	26.67	1	144	5	0	0	74	128	88	4.95	169	2.6	917	5.14	60	2.27	104	1	1	4	1	1	1	0	0	1	0	1	0	0	60	27	35	51	35	0	0	85	0
0	0	0	1	0	0	M	50	31.48	0	150	5	0	0	97	145	97	8.49	142	8.578	1394.94	7.37	70	1	104	0	1	4	1	1	1	0	0	0	0	0	0	0	40	33	31	63	27	0	0	71	0
1	0	0	0	0	0	M	69	25.71	1	127	5	1	1	66	149	69	6.13	155	0.06	328.6	4.96	19	2.5	105	0	1	4	2	0	1	0	0	0	0	0	0	1	48	42	27	42	26	0	1	3	1
0	0	0	1	0	0	M	86	21.56	0	97	3	0	0	65	118	57	7.75	244	4.621	8466.92	3.69	50	2.2	105	0	1	4	4	0	1	0	0	3	1	2	1	0	42	35	34	42	27	0	0	86	0
0	0	0	1	0	0	M	77	23.19	0	105	3	0	0	81	107	61	7.64	236	2.985	393.34	5.71	117	2.21	105	1	1	4	2	0	1	0	1	1	1	0	0	0	49	32	29	46	26	0	1	1	1
0	0	0	1	0	0	M	44	26.93	1	138	5	0	0	79	140	88	10.48	488	0.816	114.01	4.42	34	1.27	105	1	1	5	1	0	1	0	0	1	0	0	0	1	62	30	31	48	30	0	0	44	0
0	0	0	1	0	0	M	74	28.58	1	114	5	0	0	56	100	60	7.68	232	8.46	267.99	4.35	45	1.59	105	0	1	4	1	0	1	1	0	1	0	0	0	0	54	33	30	49	29	0	0	93	1
0	0	0	1	0	0	M	67	24.8	1	106	5	0	0	82	139	86	8.32	168	16	1828.94	5.44	40	1.85	105	1	1	4	1	0	1	0	0	0	0	0	0	0	67	30	28	49	23	0	1	71	0
0	0	0	1	0	0	F	62	23.83	0	121	7	0	0	66	122	66	5.02	201	4.923	1914.99	4.63	24	1.54	105	0	1	5	2	0	0	0	0	1	0	0	0	0	54	33	30	49	29	0	1	18	1
1	0	0	0	0	0	F	63	25	0	96	5	0	0	44	104	66	9.53	121	1.9	2340	7.33	44	1.39	105	1	1	4	1	0	1	0	0	1	0	0	0	0	54	33	30	49	29	0	0	102	0
0	0	0	0	0	0	M	74	20.63	0	105	0	1	0	144	81	58	4.8	192	5.65	9027.64	6.7	6	2.52	105	1	1	4	4	0	0	0	0	1	0	0	0	0	54	33	30	49	29	0	1	2	1
1	0	0	0	0	0	M	84	22.76	1	125	5	0	0	82	170	90	5.78	185	0.94	14840.5	4.82	20	2.13	105	0	1	4	3	0	1	0	0	1	0	0	0	0	54	33	30	49	29	0	0	32	1
1	0	0	0	0	0	M	67	28.48	1	125	3	0	0	63	102	72	7.6	182	0.165	800.72	7.16	44	2.93	105	1	1	4	1	0	0	0	0	1	0	1	0	1	43	35	26	58	27	0	0	92	0
0	0	0	1	0	0	M	69	25.95	1	104	7	0	0	72	120	80	8.42	141	0.22	1775.81	6.61	22	1.79	106	0	1	4	1	1	1	1	0	0	0	0	1	1	75	39	28	39	27	0	0	101	0
1	0	0	0	0	0	M	59	24.45	1	149	5	0	0	73	136	76	5.99	171	0.225	682.53	4.86	26	2.57	106	1	1	4	1	0	1	0	0	0	0	0	0	1	67	28	28	47	27	0	1	61	0
0	0	0	1	0	0	M	73	26.47	1	126	1	0	0	65	145	85	7.89	269	1.039	383.67	6.7	37	2.52	106	1	1	4	1	1	1	0	0	1	0	1	0	1	57	36	30	48	30	0	1	51	0
0	0	0	1	1	0	M	52	22.86	1	118	5	0	0	63	104	78	11.25	140	0.001	670.6	3.61	15	1.18	106	1	1	4	1	0	0	0	0	1	0	0	0	0	54	33	30	49	29	0	0	99	0
0	0	0	1	0	0	M	67	22.59	0	138	5	0	0	59	139	61	7.26	213	1.841	1440.02	4.57	45	2.06	106	1	1	4	1	0	1	0	0	1	1	1	0	0	69	38	31	49	28	0	1	76	0
1	0	0	0	1	0	M	71	25.47	1	146	0	0	0	84	130	82	10.23	113	16	2193.75	9.35	62	1.46	106	1	1	4	1	0	0	0	0	0	0	0	0	1	65	34	30	51	32	0	0	69	0
0	0	0	1	0	0	M	53	27.68	1	139	5	0	0	110	117	78	17.27	175	16	1647.25	6.7	78	2.14	106	1	1	4	3	0	1	0	0	1	0	1	0	0	42	35	32	52	30	0	1	44	0
0	0	0	1	1	0	M	80	21.48	1	152	5	0	0	96	110	82	5.33	252	0.312	6266.52	4.41	31	2.66	106	1	1	4	1	0	0	0	0	1	1	1	1	0	46	40	37	61	33	0	1
0	0	0	0	1	0	M	53	25.78	1	146	5	0	0	90	170	105	14.03	290	0.001	1157.13	7.6	40	2.59	107	1	1	5	1	1	1	0	0	1	0	1	0	1	62	31	30	43	30	0	0	50	0
0	0	0	1	0	0	M	58	27.43	1	135	5	0	0	66	91	61	10.31	229	6.743	1634.21	5.78	56	2.38	107	1	1	5	1	1	1	0	0	1	0	0	0	0	51	27	23	46	24	0	0	55	0
0	0	0	1	0	0	M	52	24.24	1	116	3	0	0	70	105	68	10.66	260	8.547	2774.01	4.55	52	2.68	107	1	1	4	1	0	0	0	0	1	1	0	1	1	61	34	28	46	29	0	0	66	0
0	0	0	1	0	0	M	52	29.76	0	148	5	0	0	78	149	102	12.12	161	16	1250.22	17.89	28	2.53	107	1	1	4	2	1	1	0	0	1	0	0	0	1	57	35	32	47	28	0	1	54	0
1	0	0	0	0	0	M	54	23.23	0	129	5	0	0	56	134	78	8.91	175	16	2122.5	5.5	67	2.22	107	1	1	5	1	0	1	0	0	1	0	1	1	1	57	31	33	47	31	0	1	49	0
0	0	0	0	0	0	M	75	41.91	1	134	5	0	0	91	144	80	8.4	126	16	226.82	5.58	45	2.1	107	0	1	4	2	0	1	0	0	1	0	0	0	0	54	33	30	49	29	0	0	102	0
0	0	0	1	0	0	M	50	29.05	0	142	7	0	0	67	122	78	5.69	364	0.415	2638.76	5.33	24	3.65	107	0	1	4	1	0	1	0	0	1	0	0	0	0	54	33	30	49	29	0	0	78	0
0	0	0	1	0	0	M	75	16.53	0	103	5	0	0	76	122	66	10.76	114	15.946	4345.48	6.58	100	2.09	107	0	1	7	1	0	0	0	0	1	0	0	0	0	54	33	30	49	29	0	0	56	1
0	0	0	1	0	0	M	52	29.74	0	134	7	0	0	70	144	88	8.45	202	4.542	467.81	5.41	32	2.17	107	1	1	7	1	0	1	0	0	1	0	1	0	0	50	35	33	50	34	0	0	65	0
1	0	0	0	0	0	M	60	21.83	1	140	3	0	0	82	105	70	8.99	397	0.51	2638.76	4.98	32	2.48	107	0	1	4	1	0	1	0	0	1	1	1	0	0	51	35	29	56	28	0	0	84	0
1	0	0	0	0	0	M	65	25.31	1	143	7	0	0	66	139	82	12.3	263	5.323	2638.76	4.32	14	2.17	108	0	1	4	1	1	1	0	0	0	0	0	1	0	72	32	34	45	28	0	0	74	0
1	0	0	0	1	1	M	37	27.68	1	153	3	0	0	78	124	87	12.6	290	8.813	97.11	5.52	69	2.82	108	1	1	5	1	0	0	0	0	1	0	0	0	0	47	32	31	49	28	0	0	57	0
0	0	0	1	0	0	M	44	26.64	0	119	5	0	0	91	120	80	7.94	262	0.1	1532.04	5.37	243	2.22	108	1	1	4	1	1	1	0	0	0	0	0	0	0	54	33	30	49	29	0	0	76	0
1	0	0	0	0	0	F	52	23.44	0	108	3	0	0	80	95	68	9.34	171	6.243	15000	4.96	83	1.09	108	0	1	4	2	1	1	0	1	3	1	3	1	0	32	37	36	60	35	0	0	3	1
0	0	0	1	0	0	M	81	19.03	1	133	5	0	0	71	136	78	8.84	155	1.407	749.33	5.35	35	1.23	109	0	1	4	1	0	1	0	0	2	1	1	0	0	54	36	30	45	30	0	0	76	0
1	0	0	0	1	0	M	73	22.04	1	146	5	0	0	65	120	80	8.29	200	16	5593.51	5.05	53	2.69	109	0	1	5	2	0	0	0	0	0	1	0	0	0	40	36	26	47	28	0	0	78	0
0	0	0	1	1	0	M	50	23.51	0	117	5	0	0	84	97	63	11.09	238	3.5	4854.72	5.21	41	1.88	109	1	1	7	1	0	1	1	0	0	0	0	0	1	59	32	30	48	27	0	0	69	0
0	0	0	1	1	0	M	71	27.29	1	138	5	0	0	64	167	77	7.41	174	0.467	505.97	5.87	17	1.57	109	1	1	4	1	0	1	0	0	1	0	0	0	0	54	33	30	49	29	0	0	69	0
0	0	0	1	0	0	M	70	23.94	1	122	3	0	0	88	116	76	7.63	172	7.15	1378.29	4.16	12	2.61	109	0	1	4	2	0	0	0	0	1	0	0	0	0	54	33	30	49	29	0	0	2	1
1	0	0	0	1	0	M	73	23.94	1	130	5	0	0	78	134	74	7.56	226	5.107	12980.2	6.8	33	3.33	109	1	1	5	2	0	0	0	0	1	0	0	0	0	54	33	30	49	29	0	1	29	1
0	0	0	1	0	0	M	52	24.61	1	129	5	0	0	80	99	65	10.02	265	10.654	485.12	6.19	41	2.56	109	1	1	5	1	1	0	0	0	0	0	1	0	0	50	34	34	51	32	0	1	46	0
0	0	0	1	1	0	M	48	24.77	1	128	5	0	0	70	120	80	6.66	233	0.031	2292.74	4.74	31	2	109	1	1	4	1	0	1	0	0	1	0	0	0	0	50	37	32	60	31	0	0	81	0
0	0	0	1	0	0	M	46	25.82	1	148	5	0	0	80	189	122	14.89	254	13.144	1111.17	9.42	90	3.15	109	1	1	5	1	1	1	1	0	1	0	1	1	0	51	38	25	61	25	0	0	49	0
0	0	0	1	1	0	M	57	22.96	1	132	5	0	0	112	100	76	8.36	254	0.049	3348.5	3.89	9	2.9	109	0	1	4	3	0	1	0	0	1	1	1	0	0	27	36	31	73	24	0	0	75	0
1	0	0	0	1	0	M	79	23.03	1	142	5	0	0	73	143	68	11.71	186	6.702	528.67	5.55	39	1.86	110	1	1	4	1	0	1	0	0	1	0	1	0	0	55	30	28	44	29	0	0	77	0
0	0	0	1	1	0	M	52	24.21	1	157	1	0	0	60	142	80	6.67	184	0.749	587.04	3.93	23	1.41	110	1	1	4	1	0	1	0	0	0	0	1	0	1	62	36	33	46	31	0	0	83	0
1	0	0	0	1	0	M	52	23.73	1	184	5	0	0	75	128	76	8.33	199	8.274	980.46	6.49	97	2.2	110	1	1	4	1	0	0	0	0	0	0	0	0	0	51	30	28	46	26	0	0	45	0
1	0	0	0	0	0	M	70	25.1	0	131	5	0	1	70	125	79	7.47	100	6.117	1760.95	6.14	41	2.3	110	1	1	7	1	0	1	1	0	1	0	1	0	0	56	41	36	46	31	0	0	49	0
0	0	0	1	0	1	M	58	21.3	1	160	5	0	0	110	120	60	19.15	322	7.1	2638.76	4.25	102	1.61	110	0	1	5	3	0	1	0	1	0	0	0	1	0	48	33	32	46	32	0	1	82	0
1	0	0	0	0	0	M	78	28.58	1	122	7	0	0	136	170	114	3.92	102	4.315	13675.1	5.26	204	1.1	110	0	1	4	2	1	1	1	0	2	1	3	1	0	51	40	40	48	34	0	0	63	1
0	0	0	1	0	0	M	71	26.49	0	135	7	0	0	70	158	79	10.14	238	1.689	2638.76	6.68	32	2.73	110	1	1	4	3	1	1	0	0	1	0	0	0	0	54	33	30	49	29	0	0	77	0
0	0	0	1	1	0	M	64	22.04	1	113	5	0	0	176	97	62	9.78	455	0.32	2833.31	7.89	14	1.31	110	1	1	5	4	0	1	1	0	1	1	0	0	0	37	36	29	56	29	0	0	46	0
0	0	0	1	0	0	M	64	23.71	1	120	5	0	0	73	142	90	7.73	244	0.776	645.27	5.29	10	2.02	111	1	1	4	1	0	0	0	0	0	0	1	0	1	61	30	35	45	29	0	1	46	0
0	0	0	1	0	0	M	76	25.95	1	126	5	0	0	85	112	65	10.89	153	16	2344.63	6.45	21	1.86	111	1	1	4	1	1	0	0	0	1	0	0	0	0	54	33	30	49	29	0	0	94	0
0	0	0	0	0	0	F	78	29.14	0	114	4	0	1	90	172	90	9.56	155	16	6225.77	9.76	31	2.24	111	0	1	7	3	0	1	0	0	1	0	0	0	0	54	33	30	49	29	0	0	81	0
0	0	0	1	0	0	M	81	23.1	1	127	7	0	0	81	152	84	8.76	131	4.568	3996.42	11.85	10	1.4	111	1	1	4	3	1	1	0	0	1	1	0	0	0	47	36	31	50	32	0	1	50	0
0	0	0	1	0	0	M	76	21.26	0	139	5	0	0	100	118	88	6.74	205	0.001	5655.52	5.14	6	2.38	111	1	1	5	1	0	1	0	0	3	0	1	0	0	34	43	36	58	31	0	0	52	0
0	0	0	1	0	0	M	57	22.55	1	129	5	1	0	107	120	89	6.34	308	5.765	3495.21	11.21	20	3.19	111	0	1	5	3	1	0	0	1	1	0	1	1	0	31	40	27	60	25	0	1	1	1
1	0	0	0	1	0	F	71	22.48	0	110	5	0	0	64	122	70	8.56	307	0.125	1050.8	4.15	36	2.37	112	1	1	4	1	0	1	0	0	1	1	0	0	1	72	29	28	44	28	0	0	70	0
1	0	0	0	0	0	M	65	20.31	1	98	5	0	0	70	98	56	9.64	158	7.1	2638.76	4.7	66	1.26	112	0	1	4	2	0	1	0	0	0	0	0	0	1	68	31	28	46	27	0	0	97	0
0	0	0	1	0	0	F	52	26.64	0	116	7	0	0	93	188	89	15.03	483	0.078	683.03	18.31	16	2.5	112	0	1	4	1	1	1	0	0	1	0	0	0	0	59	34	26	49	27	0	0	60	0
0	0	0	1	1	0	M	34	29.34	1	139	5	0	0	97	125	84	12.42	155	5.908	349.89	6.15	60	1.87	112	1	1	7	1	0	0	0	0	0	0	1	0	0	48	36	33	51	34	0	1	49	0
0	0	0	1	0	0	F	74	25.71	0	74	5	0	0	90	180	90	10.37	217	1.519	2794.72	6.7	29	1.38	112	1	1	5	3	1	1	0	0	0	0	0	0	0	48	42	26	54	28	0	0	46	0
1	0	0	0	0	0	M	80	24.49	1	122	5	1	0	85	130	86	6.3	132	3.186	2614.42	3.11	13	2.2	112	0	1	4	2	1	1	0	0	1	3	1	0	1	46	40	28	70	25	0	1	18	1
0	0	0	1	0	0	M	69	21.26	1	132	5	0	0	70	130	70	5.16	231	0.461	1249.59	5.47	24	3.78	113	0	1	5	1	1	0	0	0	0	0	0	0	1	65	31	27	45	27	0	0	71	0
0	0	0	1	0	0	M	71	20.03	0	117	5	0	0	70	126	74	7.37	221	2.757	2679.07	4.54	18	1.46	113	0	1	7	1	0	1	0	0	1	0	1	0	0	59	32	32	45	28	0	1	72	0
1	0	0	0	0	1	M	77	22.04	1	115	1	0	0	91	110	60	8.44	193	1.334	8258.15	4.89	16	2.31	113	0	1	4	3	0	1	0	0	0	2	0	0	0	65	33	30	46	28	0	0	58	0
1	0	0	0	0	0	F	73	27.06	1	121	7	1	0	88	102	58	9.24	133	3.376	1600.79	6.79	26	3.1	113	0	1	4	2	1	1	0	0	1	0	0	0	1	57	33	29	48	30	0	1	83	0
0	0	0	1	1	1	M	64	23.94	0	115	0	0	0	61	147	87	8.25	201	3.602	1802.27	6.47	47	2.82	113	0	1	4	4	0	1	1	0	1	0	0	0	0	54	33	30	49	29	0	0	1	1
0	0	0	1	0	0	M	67	27.34	0	138	3	0	0	84	142	86	7.6	171	16	2420.66	5.7	45	4.32	113	0	1	5	1	0	1	0	0	1	0	0	0	0	54	33	30	49	29	0	0	78	0
0	0	0	1	0	0	M	74	20.52	0	131	1	0	0	58	148	62	11.97	227	16	5760.37	7.93	48	3.35	113	1	1	5	2	0	1	0	0	1	1	0	0	0	57	43	37	59	33	0	0	54	0
0	0	0	1	0	0	M	52	26.99	0	121	5	0	0	82	135	80	11.24	100	16	6210.5	10.39	125	1.4	113	1	1	4	2	1	1	0	0	2	0	1	0	0	37	47	40	59	34	0	1	45	0
0	0	0	1	1	0	M	45	26.22	0	164	5	0	0	74	150	90	7.66	242	1.341	711.49	4.64	39	3.26	114	0	1	4	1	0	1	0	0	0	0	0	0	0	61	32	34	32	33	0	0	89	0
0	0	0	1	0	1	F	87	22.27	0	118	3	0	0	73	135	77	7.59	128	5.859	12587.1	6.67	22	1.58	114	0	1	4	2	0	1	0	0	1	1	0	1	1	69	32	30	37	32	0	0	55	0
1	0	0	0	1	0	M	47	22.09	0	147	5	0	0	91	106	76	5.75	153	12.664	1267.55	4.5	17	3.12	114	0	1	4	1	1	1	0	0	0	0	0	0	1	77	27	29	45	29	0	0	75	0
0	0	0	1	0	0	M	59	26.93	1	157	4	0	0	69	142	96	8.15	270	1.643	450.41	5.23	30	2.87	114	0	1	4	1	0	1	1	0	0	0	1	0	1	73	30	31	46	30	0	0	1	1
0	0	0	1	0	0	M	82	21.8	1	110	3	0	0	78	110	70	5.61	181	0.027	4709.42	5.43	7	1.46	114	1	1	4	1	0	1	1	0	1	2	1	1	0	52	35	33	49	34	0	0	56	0
0	0	0	1	0	0	M	49	25.91	1	147	1	0	0	51	91	51	10.47	126	16	2085.1	6.84	37	1.34	114	1	1	4	2	1	0	0	0	1	1	0	1	1	56	38	33	58	30	0	1	55	0
0	0	0	1	0	0	M	87	22.23	1	133	7	0	0	91	150	81	6.19	183	2.391	8220.74	5.35	19	2.87	114	1	1	4	3	0	1	0	0	1	1	1	0	0	31	47	34	58	32	0	1	14	1
1	0	0	0	0	0	M	32	27.76	1	134	3	0	0	66	66	48	13.77	221	16	5332.33	6.38	147	4.61	114	1	1	7	1	0	0	0	0	1	0	0	0	0	39	37	29	64	29	0	0	30	1
0	0	0	1	0	0	M	44	23.6	1	143	5	0	0	66	105	52	8.4	187	16	539.89	5.21	10	3.21	115	1	1	4	1	0	0	0	0	1	0	0	0	1	54	28	29	46	26	0	1	52	0
0	0	0	1	0	0	M	60	21.8	1	154	7	0	0	57	153	91	13.44	182	0.034	20	12.74	22	4.1	115	0	1	5	2	1	1	0	0	1	1	1	0	0	73	34	28	48	25	0	0	79	0
0	0	0	1	0	0	F	65	21.5	0	116	5	0	0	96	110	72	7.76	242	0.589	2911.56	6.37	23	1.68	115	0	1	4	1	0	1	0	0	1	1	1	1	0	60	30	28	48	28	0	0	76	0
0	0	0	1	1	1	M	59	24.34	0	142	5	0	0	68	158	72	6.99	213	0.472	1615.67	9.42	60	2.48	115	0	1	5	1	1	1	0	0	0	0	1	0	1	57	39	28	49	26	0	1	71	0
1	0	0	0	0	0	M	75	27.64	0	141	7	0	1	110	118	70	19	235	0.79	3430.28	20.4	20	1.53	115	0	1	4	4	1	1	1	0	0	0	0	0	0	54	33	30	49	29	0	0	5	1
1	0	0	0	1	0	M	68	21.3	0	133	6	0	0	75	134	90	7.84	184	0.001	472.13	4.36	29	1.55	115	1	1	4	1	0	1	0	0	0	0	1	0	1	42	35	33	51	26	0	0	94	0
1	1	0	0	1	0	M	69	26.56	0	126	6	0	0	85	128	76	6.11	250	5.91	2261.17	6.68	17	2.38	115	1	1	4	1	1	1	0	0	1	1	1	1	1	61	41	29	51	26	0	0	44	0
1	0	0	0	0	0	M	66	24.86	1	135	5	0	0	79	161	94	7.36	224	3.382	1809.48	5.5	39	2.77	115	0	1	4	2	0	1	0	0	1	1	0	1	0	55	32	31	52	25	0	1	68	0
0	0	0	1	0	0	M	62	25.86	1	113	3	0	0	86	108	60	11.45	218	16	2638.76	5.93	38	1.75	115	1	1	4	4	0	0	0	0	1	1	1	1	0	59	37	30	52	29	0	1	64	0
0	0	0	1	1	0	M	81	21.77	1	116	5	0	0	72	116	76	5.9	142	1.854	5622.24	5.8	99	1.54	115	1	1	4	1	0	1	0	0	1	0	3	0	1	37	39	44	52	32	0	0	72	1
0	0	0	1	0	0	F	82	24.03	0	102	5	1	0	68	135	65	5.43	160	0.007	448.31	4.17	15	2.44	116	1	1	4	1	1	1	1	0	1	1	0	1	1	63	32	26	47	27	0	1	52	0
1	0	0	0	0	0	M	74	21.67	1	121	5	0	0	66	120	70	12.04	179	16	2754.11	5.13	25	1.66	116	0	1	4	2	0	1	0	0	0	0	0	0	0	39	33	29	48	11	0	1	32	1
0	0	1	0	0	0	M	63	23.15	1	143	5	0	0	82	142	97	11.79	252	4.327	845.55	3.59	17	2.97	116	0	1	4	1	0	1	0	0	1	0	0	0	0	54	33	30	49	29	0	1	71	0
0	0	0	1	0	0	F	67	22.67	0	89	3	0	0	81	120	80	7.1	142	1.995	3326.43	5.97	40	1.75	116	1	1	4	4	0	1	0	0	1	0	0	0	0	54	33	30	49	29	0	0	4	1
0	0	0	1	0	0	M	52	24.2	1	130	6	0	0	85	133	86	12.28	193	2.035	5096.87	5.92	24	1.67	116	0	1	4	2	1	1	0	0	1	0	0	0	0	54	33	30	49	29	0	0	74	0
1	0	0	0	1	0	F	64	23.94	0	99	5	0	0	93	137	84	9.02	268	7.443	6397.95	8.39	58	2.61	116	0	1	5	2	0	1	0	0	1	0	0	0	0	54	33	30	49	29	0	0	5	1
1	0	0	0	0	0	F	78	20.2	0	121	0	0	0	100	114	78	13.13	286	11.587	14890.1	6.84	125	2.48	116	0	1	4	3	1	1	1	0	3	0	1	1	0	44	40	29	52	26	0	0	35	1
1	0	0	0	0	0	M	60	20.73	1	125	1	0	1	98	106	62	14.83	152	16	6439.24	9.13	34	0.82	116	1	1	4	1	0	0	0	0	1	0	2	0	0	44	35	39	53	31	0	1	37	1
0	0	0	1	1	0	M	44	26.96	1	154	1	0	0	63	140	71	10.83	196	1.228	205.07	4.54	23	2.09	116	1	1	4	1	0	0	0	0	1	0	1	0	0	62	35	35	54	35	0	1	49	0
0	0	0	1	1	0	M	60	27.55	0	153	5	0	0	88	147	84	11.17	220	6.454	3673.97	11.86	29	2.92	116	1	1	5	3	1	1	0	0	1	0	1	0	0	40	39	30	57	29	0	0	48	0
1	0	0	0	0	0	F	60	27.11	1	121	5	0	0	66	98	68	5.89	189	3.225	4713.06	5.28	21	2.26	116	1	1	5	1	1	1	0	0	3	1	2	0	0	26	37	32	71	29	0	0	44	0
0	0	0	1	1	0	M	51	23.03	0	143	5	0	0	61	135	89	8.8	276	16	1772.9	5.68	22	3.32	117	1	1	5	1	1	1	0	0	0	0	1	0	1	72	32	30	43	28	0	0	70	0
0	0	0	1	0	0	M	72	22.99	1	148	4	0	0	69	166	92	7.7	268	0.724	131.92	4.3	45	2.75	117	0	1	4	1	0	1	0	0	0	0	0	0	0	63	31	33	46	31	0	0	72	0
1	0	0	0	1	0	M	65	17.72	1	144	5	0	0	70	135	71	12.67	180	3.084	2594.34	5.53	47	1.29	117	1	1	5	1	0	1	1	0	1	0	1	0	0	42	29	29	48	25	0	1	46	0
0	0	0	1	0	0	M	57	19.03	1	131	0	0	0	56	74	46	11.56	229	11.357	543.69	4.73	65	2.61	117	0	1	4	1	0	0	0	0	1	0	0	0	0	54	33	30	49	29	0	0	92	0
0	0	0	1	0	0	M	79	26.45	1	134	1	0	0	72	97	60	11.93	155	1.841	1305.4	6.16	54	1.77	117	1	1	5	1	1	1	0	0	1	0	0	0	0	54	33	30	49	29	0	1	46	0
0	0	0	1	0	0	M	84	27.31	1	90	0	0	0	98	110	62	7.64	104	13.962	5364.93	6.61	39	1.32	117	0	1	4	2	0	0	0	0	1	0	0	0	0	54	33	30	49	29	0	0	18	1
0	0	0	1	0	0	M	72	24.68	1	150	0	0	0	61	100	80	11.39	179	12.653	3017.91	7.98	44	3.11	117	1	1	4	2	1	0	0	0	2	1	1	0	0	34	36	26	53	23	0	1	67	0
0	0	0	1	1	0	M	72	27.04	1	108	5	0	0	80	148	78	11.88	211	9.882	10948.7	7.61	53	2.36	117	1	1	4	3	0	1	0	0	1	1	0	0	0	38	39	35	57	33	0	1	65	0
0	0	0	1	1	0	M	85	18.29	1	150	1	0	0	55	86	50	12.35	140	9.838	4173.2	4.24	15	3.18	118	0	1	4	4	0	0	0	0	1	1	1	0	1	46	23	31	38	30	0	0	37	1
1	0	0	0	0	0	M	78	24.63	1	133	5	0	0	65	124	70	8.18	220	7.074	1152.71	6.54	55	3.03	118	1	1	5	2	0	1	1	0	1	1	0	0	0	69	33	25	44	26	0	0	68	0
0	0	0	1	1	0	M	66	22.86	1	121	1	0	0	93	103	63	8.76	211	14.318	5302.39	11.21	25	4.08	118	0	1	4	2	1	0	0	0	1	1	1	0	0	60	33	31	48	29	0	1	59	1
0	0	0	1	0	0	M	62	24.38	1	149	1	0	0	62	86	62	15	216	16	759.62	8.09	103	2.9	118	1	1	5	1	1	1	0	0	1	0	0	0	0	54	33	30	49	29	0	0	82	0
0	0	0	1	1	0	F	72	23.94	0	100	3	0	0	116	86	52	9.44	192	8.092	2638.76	6.15	107	1.41	118	0	1	4	1	1	1	0	0	1	0	0	0	0	54	33	30	49	29	0	0	103	0
0	0	0	1	0	0	M	81	23.94	1	126	0	1	0	117	131	83	12.34	174	1.054	11555.2	6.01	34	3.69	118	0	1	4	2	0	1	0	0	1	1	1	1	1	31	29	25	58	18	0	1	3	1
0	0	0	1	1	0	M	63	26.4	1	146	5	0	0	77	130	70	11.38	195	0.001	2050.53	6	6	2.57	118	0	1	4	1	0	0	0	0	1	1	3	0	0	41	35	44	62	38	0	1	70	1
0	0	0	1	0	0	M	66	20.32	1	135	1	0	0	54	90	64	7.82	180	1.232	345.68	6.31	30	1.38	119	1	1	4	1	0	0	0	0	0	0	1	0	1	69	30	42	40	34	0	1	68	0
0	0	0	1	0	0	M	73	21.78	1	123	5	0	0	75	125	66	5.11	110	1.906	819.32	5.19	33	1.42	119	1	1	4	1	0	1	1	0	0	1	0	0	1	64	31	26	41	28	0	0	51	0
0	0	0	1	0	0	M	59	28.34	1	118	7	0	0	67	158	72	9.01	172	16	6501.24	8.85	18	3.53	119	1	1	4	2	1	1	0	0	1	0	1	0	0	47	40	35	60	29	0	1	46	0
0	0	0	1	1	0	M	70	21.45	1	151	3	0	0	76	119	64	5.7	162	0.001	9558.12	4.61	27	1.89	119	1	1	4	1	0	1	0	0	1	0	1	1	0	38	41	31	63	31	0	1	55	0
0	0	0	1	0	0	M	50	26.81	1	151	5	0	0	60	100	60	14.65	268	9.723	1175.59	6.95	39	1.29	120	0	1	4	2	1	1	0	0	1	0	0	0	1	68	28	27	43	26	0	0	68	0
1	0	0	0	0	0	F	80	18.67	0	99	5	0	0	79	117	71	5.26	186	1.537	6270.67	4.22	50	2.38	120	0	1	4	1	0	1	0	0	1	0	0	0	0	54	33	30	49	29	0	0	54	1
1	0	0	0	0	1	M	78	17.72	1	126	1	0	1	119	128	72	13.03	135	0.451	15000	6.03	32	1.97	120	0	1	4	2	0	1	1	0	1	0	0	0	0	54	33	30	49	29	0	0	59	0
1	0	0	0	1	0	M	80	23.94	0	101	3	0	0	152	128	76	13.56	112	24	15300	6.7	97	1.11	120	0	1	5	4	0	0	0	0	1	0	0	0	0	54	33	30	49	29	0	1	1	1
0	0	0	1	0	0	M	55	25.61	0	121	5	0	0	65	138	82	8.05	170	2.039	2180.78	5.37	35	1.63	120	1	1	5	2	1	1	0	0	1	1	1	0	1	56	40	32	53	32	0	1	48	0
0	0	0	1	0	0	M	68	22.23	1	124	7	0	0	78	152	72	6.82	198	3.403	3790.9	4.99	17	3.14	120	0	1	5	1	0	0	0	0	2	1	1	0	0	48	36	31	56	30	0	1	30	1
0	0	0	1	0	0	M	65	25.32	1	133	5	0	0	86	110	80	5.2	147	0.539	1664.07	4.48	23	2.92	120	0	1	4	1	0	0	1	0	1	1	1	0	0	43	38	32	57	32	0	1	51	0
0	0	0	1	1	0	M	71	23.66	1	140	3	0	0	74	109	74	7.22	153	0.001	4823.42	8.75	97	2.68	121	0	1	5	3	1	0	1	0	0	0	0	1	0	46	33	28	50	31	0	1	73	0
1	0	0	0	0	0	M	71	23.18	1	110	3	0	0	78	88	52	15.85	246	16	4280.74	8.25	62	2.68	121	0	1	4	2	1	0	1	0	1	0	2	0	0	43	36	38	51	35	0	0	80	0
0	0	0	1	0	0	F	64	26.67	0	110	7	0	0	81	126	74	7.94	310	0.001	6217.28	4.87	31	1.17	121	0	1	4	1	1	1	1	0	1	0	1	0	0	42	41	31	54	31	0	1	53	0
1	0	0	0	0	0	M	73	23.88	0	162	0	0	0	110	119	99	7.89	211	5.446	15000	5.48	75	2.24	122	1	1	4	4	0	0	0	0	1	0	1	0	0	36	44	30	57	34	0	0	1	1
1	0	0	0	1	1	M	50	24.54	1	161	3	0	0	73	74	42	15.56	317	16	87.83	13.61	243	3.85	123	1	1	5	4	0	1	0	1	1	0	0	0	0	54	33	30	49	29	0	0	55	0
0	0	0	1	0	0	M	60	31.05	1	116	5	0	0	87	133	80	13.18	313	12	3870	4.83	36	2.77	123	0	1	4	1	1	1	0	0	0	0	0	0	0	54	33	30	49	29	0	0	70	0
0	0	0	1	0	0	M	63	23.18	1	119	7	0	0	90	129	66	7.8	120	1.42	4239.02	5.86	14	2.31	123	0	1	5	2	1	1	0	0	1	0	1	0	0	43	35	30	56	30	0	1	54	0
0	0	0	1	1	0	M	74	27.55	1	117	7	0	0	78	142	82	8	181	9.993	5246.55	5.68	41	4.28	123	1	1	4	2	0	1	0	0	1	1	0	0	0	47	36	26	59	26	0	0	71	0
0	0	0	1	0	0	F	67	21.78	0	97	3	0	0	80	98	64	9.22	290	5.621	4775.15	10.06	117	2.73	124	0	1	5	1	1	0	0	0	1	1	1	0	1	59	33	26	40	30	0	0	48	0
1	0	0	0	0	1	M	63	23.94	1	113	1	1	0	60	133	77	7.75	157	2.344	2638.76	6.8	17	1.54	124	0	1	4	1	1	0	0	0	0	0	1	0	1	67	33	29	42	28	0	1	81	0
0	0	0	1	1	0	M	61	25.5	1	150	5	0	0	63	120	70	7.7	265	1.062	2685.13	4.94	69	2.06	124	1	1	4	1	0	0	0	0	1	0	1	0	0	48	35	30	49	28	0	1	55	0
0	0	0	1	0	0	M	64	25.71	1	134	5	0	0	76	128	82	7.02	246	0.026	1456.54	4.81	31	1.76	124	1	1	4	1	0	1	0	0	2	0	1	0	0	47	31	30	52	31	0	1	54	0
1	0	0	0	0	0	M	63	26.95	0	130	7	0	0	78	148	85	10.35	254	8.9	927.06	6.16	38	2.97	124	0	1	4	1	0	1	1	0	1	0	0	0	0	53	34	28	58	25	0	0	70	0
0	0	0	1	0	0	M	76	29.69	1	98	1	0	0	78	102	62	7.03	209	4.638	7440.83	6.31	41	2.59	125	1	1	4	2	0	1	0	0	1	0	0	0	0	54	33	30	49	29	0	1	89	0
1	0	0	0	0	0	M	74	22.65	1	109	5	0	0	79	144	72	8.29	175	16	447.02	5.1	57	2.52	125	0	1	5	2	1	1	0	0	1	0	0	0	0	53	34	32	53	33	0	1	74	0
0	0	0	1	0	0	M	81	26.53	1	103	4	0	1	80	192	82	9.14	184	0.024	1707.66	5.37	16	2.15	126	0	1	4	3	0	1	1	0	2	1	0	0	0	58	34	25	37	28	0	0	1	1
0	0	0	1	0	0	M	78	23.15	1	109	5	0	0	75	132	66	7.83	196	4.8	792.83	6.19	15	1.16	126	1	1	4	1	0	1	0	0	1	0	1	0	1	63	33	32	41	33	0	1	49	0
1	0	0	0	0	0	F	77	20.34	0	109	0	0	0	79	161	98	13.01	267	2.625	5921.7	8.13	14	4.47	126	0	1	4	1	0	1	1	0	1	0	0	0	0	54	33	30	49	29	0	0	1	1
0	0	0	1	0	0	M	64	27.78	0	151	5	0	0	72	120	80	7.48	204	11.312	625.67	7.69	45	2.55	126	1	1	5	1	1	1	0	0	1	1	0	0	0	65	35	32	50	29	0	1	74	0
0	0	0	1	1	0	M	67	27.34	0	153	5	0	0	97	137	92	8.53	202	2.515	4283.78	11.98	382	1.88	126	0	1	4	2	1	1	0	0	1	1	1	0	0	52	37	34	57	32	0	0	38	1
0	0	0	1	0	0	M	72	27.73	1	118	1	0	0	66	210	100	8.24	186	1.997	7226.05	3.51	56	2.05	126	0	1	4	1	0	1	1	0	2	0	1	0	0	48	41	35	59	31	0	1	62	0
1	0	0	0	1	0	M	68	20.32	0	144	5	0	0	96	152	88	6.91	223	0.549	6867.01	5.17	12	2.02	126	1	1	4	2	0	1	0	0	1	0	1	0	1	49	36	28	60	29	0	1	97	0
0	0	0	1	0	0	M	82	19.03	1	136	7	0	0	70	140	88	9.69	164	2.361	3330.11	5.1	43	3.58	127	0	1	4	1	0	0	1	0	1	1	0	3	1	56	31	44	34	38	0	0	47	1
1	0	0	0	0	0	M	81	26.08	1	106	5	0	0	77	136	65	6.25	117	7.033	2539.99	4.58	23	1.47	127	0	1	5	1	0	0	0	0	1	0	2	0	0	58	49	65	55	34	0	0	10	1
1	0	0	0	0	0	M	78	24.91	1	140	5	0	0	85	161	99	15.1	321	2.485	1616.52	8.32	44	2.8	128	1	1	5	1	0	0	1	0	0	1	0	0	0	48	34	33	47	32	0	1	49	0
1	0	0	0	0	1	M	67	23.94	0	127	5	0	0	62	124	74	6.09	204	1.846	203.01	6.59	29	3.06	128	1	1	5	1	0	0	0	0	0	0	1	0	0	50	38	27	51	26	0	1	51	0
0	0	0	1	0	0	M	71	26.57	0	166	5	0	0	121	142	98	9.59	231	6.137	7748.76	8.93	21	1.94	128	0	1	4	1	1	1	0	0	1	0	0	0	0	41	44	38	61	39	0	1	2	1
0	0	0	1	0	0	M	65	24.84	1	116	5	0	0	69	159	79	4.79	212	0.773	2662.45	2.84	16	2.5	129	1	1	4	1	1	0	0	0	2	0	1	0	0	49	36	33	51	33	0	1	46	0
0	0	0	1	1	0	M	62	20.43	0	129	3	0	0	50	114	52	11.24	142	16	2887.63	3.11	58	2.76	129	0	1	5	1	0	1	0	0	1	1	1	0	0	49	29	33	53	32	0	0	54	1
0	0	0	1	0	0	M	63	23.94	1	104	0	0	0	90	83	54	9.54	191	8.395	15000	7.24	45	3.27	130	0	1	5	4	0	0	0	0	1	0	0	0	0	54	33	30	49	29	0	0	66	0
0	0	0	1	0	0	M	70	25.71	1	117	0	0	0	88	105	75	6.65	193	0.034	7656.62	6.57	29	2.4	131	0	1	4	1	0	0	0	0	1	1	0	0	0	25	41	35	60	32	0	0	50	1
1	0	0	0	1	1	M	63	20.2	1	124	5	0	0	80	127	94	9.86	166	16	2797.52	4.31	30	1.67	132	0	1	4	1	0	1	0	0	0	0	2	1	1	81	34	31	40	28	0	0	98	0
0	0	0	1	0	0	M	70	22.31	1	94	1	0	0	48	128	68	12.7	210	16	3986	5.81	43	2.57	132	0	1	5	2	0	0	0	1	1	1	1	0	1	77	33	31	44	31	0	0	1	1
0	0	0	1	0	0	M	53	19.03	1	115	3	0	0	80	128	69	9.27	95	12.312	1919.37	8.68	45	1.29	132	1	1	4	1	1	0	0	0	1	0	1	0	1	59	38	30	48	29	0	0	45	0
1	0	0	0	0	0	F	77	23.52	0	96	7	0	0	107	144	90	10.42	289	2.81	11700	16.69	25	2.06	132	0	1	4	4	1	1	0	1	1	0	0	0	0	54	33	30	49	29	0	0	1	1
0	0	0	1	1	0	M	60	26.5	0	156	5	0	0	94	124	80	8.06	163	0.07	2208.86	5.81	33	2.52	133	1	1	4	1	0	1	0	0	0	0	0	0	0	45	33	35	48	26	0	0	51	0
0	1	0	1	0	1	M	55	26.49	1	131	5	0	0	59	122	72	15.37	188	16	1472.17	10.15	52	3.24	133	1	1	5	2	0	1	0	0	1	0	0	0	1	56	37	33	50	32	0	0	49	0
0	0	0	1	0	0	M	76	21.22	1	115	7	0	0	87	190	60	6.7	215	2.931	2638.76	11.58	11	3.22	133	1	1	4	1	1	1	0	0	0	1	0	0	0	60	33	31	50	30	0	0	41	1
0	0	0	1	1	0	M	51	25.47	1	144	3	0	0	86	82	62	19.43	187	11.582	8101.61	6.83	69	3.11	133	0	1	4	4	0	0	0	0	0	1	1	0	0	49	41	36	51	36	0	0	1	1
1	0	0	0	0	0	M	85	20.25	1	128	5	0	0	64	124	67	4.97	195	0.003	558.92	4.66	8	1.15	133	0	1	2	1	0	1	0	0	1	1	1	0	0	50	33	30	53	30	0	0	75	0
0	0	0	1	0	0	M	63	26.64	1	163	1	0	0	69	141	72	10.22	237	3.874	2898.1	5.66	67	2.96	134	1	1	4	2	0	1	0	0	0	0	0	1	0	42	31	28	40	29	0	0	54	0
1	0	0	0	1	1	M	65	28.69	1	157	4	0	0	55	164	94	8.59	221	0.189	927.03	5.18	25	3.14	134	0	1	4	2	0	1	1	0	0	1	0	0	1	62	34	29	48	29	0	0	52	0
1	0	0	0	1	0	M	81	21.45	0	123	3	0	0	73	150	75	4.74	128	0.435	2638.76	5.83	18	2.08	135	0	1	4	2	1	1	1	0	0	0	0	0	1	67	33	27	45	29	0	0	29	1
1	0	0	0	0	0	M	80	14.45	1	121	0	0	0	98	92	62	7.31	135	15.994	6536.02	6.14	36	1.4	136	0	1	4	1	0	0	0	0	0	2	2	0	0	50	21	35	35	31	0	1	46	0
1	0	0	0	0	1	M	89	26.81	0	103	5	0	0	100	160	100	7.85	146	1.629	2638.76	4.75	45	2.26	136	0	1	4	2	0	0	0	0	1	1	1	0	0	43	35	25	57	26	0	0	11	1
1	0	0	0	0	0	M	78	23.72	1	139	7	0	0	80	190	90	6.59	166	0.001	1629.71	4.84	16	2.96	137	1	1	4	1	1	1	0	0	1	1	1	1	1	61	34	31	48	31	0	0	54	1
0	0	0	1	0	0	M	72	24.14	1	114	5	0	0	82	158	76	8.34	225	4.416	3863.45	5.63	47	2.93	137	0	1	4	2	0	1	0	0	2	0	1	1	0	66	34	30	50	32	0	0	87	0
0	0	0	1	1	0	F	89	37.46	0	105	1	0	0	99	128	76	7.18	127	0.849	15000	7.53	23	1.67	137	0	1	5	3	0	1	0	0	2	1	1	0	0	23	33	35	56	34	0	0	12	1
1	0	0	0	0	0	M	64	21.63	0	131	1	0	0	57	140	79	5	262	0.254	2598.37	4.61	23	2.52	138	1	1	4	1	0	1	0	0	1	0	0	0	0	54	33	30	49	29	0	1	54	0
0	0	0	1	0	0	M	71	26.45	1	136	1	0	1	57	131	69	5.42	298	0.301	3177.4	6.7	21	2.52	138	1	1	5	2	0	1	0	0	1	0	0	0	0	54	33	30	49	29	0	0	36	1
0	0	0	1	1	0	M	68	27.08	0	153	1	0	0	62	163	93	16.01	197	3.836	5778.23	5.12	21	3.05	138	0	1	4	1	0	1	0	0	1	0	0	0	0	54	33	30	49	29	0	0	4	1
0	0	0	1	1	0	M	87	25.91	1	100	7	1	0	76	146	96	5.37	243	0.001	2174.94	7.38	15	2.15	138	0	1	4	1	0	1	0	0	1	1	1	1	0	51	39	34	52	34	0	0	66	1
0	0	0	1	1	0	M	61	21.63	1	84	5	1	0	101	128	76	14.55	324	16	5051.04	5	79	2.03	138	0	1	4	2	0	0	0	0	1	0	1	0	0	42	34	29	52	26	0	1	51	0
0	0	0	1	1	0	M	76	22.66	0	143	5	1	0	66	128	68	9.55	209	16	2799.09	4.21	47	1.69	139	0	1	4	2	0	1	0	0	1	1	1	0	0	46	33	32	40	30	0	1	59	0
0	0	0	1	0	0	M	85	20.02	1	117	3	0	0	64	85	60	9.48	212	13.249	3354.36	4.79	14	1.88	139	0	1	5	1	1	0	1	0	1	1	0	0	1	66	27	25	45	24	0	0	56	1
0	0	0	1	0	0	M	68	33.06	1	147	7	0	0	74	130	83	13.23	191	0.27	625	5.59	45	3.28	139	1	1	4	1	0	1	0	0	0	0	1	0	0	45	37	33	50	32	0	0	46	1
0	0	0	1	0	0	M	75	22.04	0	130	3	0	0	71	115	59	5.45	169	5.032	3907.08	5.08	22	2.04	139	0	1	4	1	0	0	0	0	3	1	0	0	0	35	38	26	59	24	0	1	17	1
0	0	0	1	0	0	F	62	25.97	1	95	4	0	0	48	116	98	17.07	186	16	4317.01	7.12	63	1.83	140	1	1	4	1	0	1	0	0	2	0	2	0	0	40	38	35	40	30	0	1	63	0
0	0	0	1	0	0	M	67	20.2	0	109	0	0	0	62	107	64	13.94	177	16	5664.23	6.7	67	2.15	140	0	1	4	2	0	1	0	0	1	0	0	0	0	54	33	30	49	29	0	0	2	1
0	0	0	1	1	0	M	67	23.15	1	134	3	0	0	70	100	60	11.16	197	1.856	1212.44	5.45	15	2.9	141	1	1	5	2	0	0	0	0	0	0	0	0	1	65	32	28	44	28	0	1	47	1
1	0	0	0	0	0	M	58	23.94	1	117	1	0	0	96	109	80	8.25	198	11.036	5796.74	6.7	19	2.4	141	0	1	4	4	1	0	0	0	2	0	1	0	0	47	36	24	50	26	0	0	1	1
0	0	0	0	1	0	M	78	18.93	1	113	5	0	0	80	128	76	5.61	210	1.312	7579.86	4.78	22	2.29	141	1	1	4	3	0	0	0	0	1	1	1	1	0	29	38	37	60	33	0	0	44	0
1	0	0	0	1	0	F	66	21.76	1	84	1	0	0	102	96	83	10.82	337	16	15000	6.7	70	2.4	142	0	1	4	4	1	0	1	0	2	1	2	1	0	36	35	33	52	32	0	0	52	0
0	0	0	1	1	0	M	56	28.73	1	167	1	0	0	98	107	84	12.52	185	16	340.45	4.02	114	2.25	142	1	1	7	2	0	0	0	0	1	0	1	0	0	43	34	31	54	30	0	0	53	0
1	0	0	0	0	0	M	87	29.47	0	115	7	0	0	57	128	76	6.31	270	0.102	1007.45	4.68	15	2.28	143	1	1	4	1	0	1	0	0	0	1	0	0	0	59	34	32	48	32	0	0	59	0
0	0	0	0	0	0	M	53	22.99	1	123	4	0	0	85	145	94	10.41	332	1.712	9055.75	7.44	13	1.25	143	1	1	5	1	1	1	1	0	1	0	0	0	0	54	33	30	49	29	0	0	8	1
0	0	0	1	1	0	M	70	22.86	0	116	5	0	0	68	147	80	4.86	294	16	6255.44	5.17	40	2.68	143	1	1	5	1	0	1	0	0	1	0	1	0	0	53	29	30	52	30	0	1	51	0
0	0	0	1	1	0	M	71	20.08	0	121	3	1	0	95	180	100	8.29	117	6.523	8455.71	6.14	13	4.08	143	1	1	4	4	1	1	0	0	1	0	0	0	0	32	36	28	57	24	0	1	48	0
1	0	0	0	0	0	F	78	32.05	0	105	4	0	0	71	132	67	6.06	157	1.727	774.28	5.1	19	2.05	144	1	1	4	1	1	1	1	0	1	1	0	0	1	59	35	28	51	29	0	1	45	0
1	0	0	0	0	0	M	79	26.13	0	117	5	0	0	72	160	90	5.92	174	4.218	3423.63	7.07	28	2.07	144	1	1	5	2	0	1	0	0	1	0	1	0	0	52	38	32	51	32	0	1	45	0
0	0	0	1	0	1	M	62	29.41	1	131	0	0	0	70	80	50	10.52	159	16	205.66	6.14	221	1.48	144	1	1	4	2	1	1	1	1	0	0	0	0	1	63	36	35	53	34	0	1	91	0
0	0	0	1	0	0	F	84	22.03	0	98	5	0	0	60	125	60	8.04	230	0.004	6391.07	8.3	6	1.69	144	0	1	4	2	1	1	1	0	2	1	0	1	1	61	33	29	55	29	0	0	42	1
0	0	0	1	0	0	M	71	19.14	1	142	5	0	0	88	100	78	4.49	112	16	13067.9	5.02	20	1.53	145	0	1	2	1	0	0	0	0	2	0	3	0	0	20	40	51	62	33	0	0	2	1
1	0	0	0	1	0	M	69	26.22	1	144	3	0	0	87	105	65	19.7	248	12.453	3484.66	4.82	28	2.96	146	0	1	7	1	0	0	0	0	0	0	0	1	1	63	32	30	50	26	0	1	6	1
0	0	0	1	0	0	M	57	28.71	0	96	4	0	0	86	168	100	6.94	296	0.91	12211.6	6.4	12	2.51	146	0	1	4	2	1	1	0	0	1	1	0	0	0	37	39	35	54	27	0	0	61	0
0	0	0	1	0	0	M	82	22.04	1	121	4	1	0	67	134	65	7.1	220	0.193	597.13	6.76	9	1.66	147	1	1	5	2	1	1	0	0	1	1	1	0	0	52	37	27	42	31	0	1	36	1
0	0	0	1	0	0	M	71	16.9	1	115	3	0	0	97	120	68	9.12	347	6.583	10862.4	6.61	80	2.75	147	0	1	7	2	0	0	0	0	3	1	1	1	1	56	31	26	48	33	0	0	58	1
1	0	0	0	0	0	M	67	27.34	1	146	5	0	0	72	138	78	5.56	204	1.278	3511.32	5.1	20	1.9	147	0	1	5	1	0	0	1	0	1	1	1	1	0	55	33	32	50	29	0	0	35	1
1	0	0	0	0	0	F	79	22.66	0	108	4	0	0	48	133	73	6.17	182	0.782	4610.28	6.35	218	2.81	147	0	1	4	2	1	1	1	0	0	0	0	1	0	59	31	32	55	31	0	0	72	0
0	0	0	1	0	0	M	67	21.68	0	125	5	0	0	56	122	66	6.16	205	0.008	3041.9	3.98	25	1.43	148	1	1	4	1	0	1	0	0	1	0	1	1	0	52	37	34	42	32	0	0	50	0
0	0	0	1	0	0	M	59	23.31	1	139	5	0	0	93	104	62	19.41	150	16	2017.91	6.87	52	2.02	148	1	1	4	3	0	0	0	0	0	0	0	0	1	41	32	30	47	29	0	1	98	0
0	0	0	1	0	1	F	73	17.26	0	97	5	0	0	101	109	50	18.55	219	6.49	293.84	7.5	31	1.2	148	0	0	4	1	1	1	0	0	1	0	0	0	0	54	33	30	49	29	0	0	83	1
0	0	0	1	0	0	F	74	20.89	0	111	5	0	0	90	128	70	12.52	167	16	3178.07	6.44	36	3.25	148	0	1	4	2	1	1	0	1	1	0	0	0	0	54	33	30	49	29	0	0	3	1
0	0	0	1	1	0	M	42	27.54	1	144	5	0	0	77	124	79	8.68	190	0.004	445.54	5.39	68	1.81	149	1	1	4	1	1	1	0	0	0	0	0	0	1	70	34	26	48	26	0	0	70	0
0	0	0	1	0	0	M	79	20.02	1	129	5	0	0	69	136	70	6.34	128	1.347	4187.59	4.46	12	2.52	149	0	1	4	2	0	0	0	0	1	0	0	0	0	54	33	30	49	29	0	1	8	1
1	0	0	0	0	0	F	77	23.31	1	114	1	0	0	60	100	56	7.12	137	16	3920.3	6.26	116	2.09	149	0	1	4	1	0	1	0	0	2	1	2	1	1	50	29	28	54	28	0	0	3	1
1	0	0	0	1	0	M	54	24.22	1	120	5	1	0	105	100	73	7.94	175	16	10287.6	8.44	395	2.88	149	1	1	5	4	0	0	0	1	3	0	2	0	0	45	47	36	57	36	0	1	4	1
1	0	0	0	1	0	M	67	23.83	1	118	3	0	0	87	123	78	2.04	165	0.362	7067.25	5.67	29	1.47	149	1	1	4	2	0	0	0	0	1	0	1	0	0	36	40	29	61	29	0	0	53	0
1	0	0	0	1	0	M	51	20.31	1	134	5	0	0	88	118	70	8.02	214	14.13	4735.75	5.08	21	1.98	150	1	1	4	1	0	0	0	0	1	0	1	1	1	54	32	30	55	27	0	0	100	0
0	0	0	1	1	0	M	48	21.22	0	141	3	0	0	91	80	55	10.98	178	16	1716.57	6.7	43	2.03	151	0	1	4	1	0	1	0	0	0	0	0	0	1	52	32	33	57	32	0	1	99	0
1	1	1	0	1	0	M	75	21.97	1	134	3	0	0	92	106	71	10.15	149	11.493	11653.5	6.7	28	2.13	152	0	1	4	4	1	0	0	1	1	1	1	0	0	33	31	24	52	24	0	0	4	1
0	0	0	1	0	0	M	61	26.3	1	145	7	0	0	69	136	78	11.07	184	12.087	2961.99	8.42	25	2.16	152	0	1	4	1	1	1	0	0	2	0	0	0	1	37	34	33	68	32	0	1	98	1
1	0	0	0	0	1	M	81	28.65	1	68	0	0	0	73	131	91	10.3	196	2.127	2638.76	6.97	20	1.96	153	0	0	0	1	0	0	0	0	1	0	0	0	0	54	33	30	49	29	0	0	1	1
0	0	0	1	0	1	M	60	21.67	1	128	4	0	0	89	137	97	12.15	181	0.001	464.82	7.4	76	1.1	154	0	1	4	1	1	1	1	0	1	0	0	0	0	54	33	30	49	29	0	0	20	1
0	0	0	1	0	1	F	87	18.03	0	80	7	0	0	71	188	90	3.65	123	7.854	4020.83	4.83	17	1.58	155	0	1	3	1	0	1	0	0	1	0	0	0	0	54	33	30	49	29	0	0	33	1
0	0	0	1	1	0	M	70	23.94	0	103	3	0	0	87	109	65	11.11	234	2.3	10500	7.21	39	2.64	156	0	1	5	3	0	1	1	0	1	0	0	0	0	54	33	30	49	29	0	1	24	1
0	0	0	1	0	0	M	76	19.27	0	144	5	0	0	68	96	68	6.85	200	0.039	117.37	5.03	57	2.19	157	1	1	4	1	0	0	0	0	0	0	0	0	1	59	35	31	45	32	0	0	61	0
0	0	0	1	0	0	M	60	25	0	162	5	0	0	50	124	58	13.69	183	16	1127.51	7.07	28	3.31	157	1	1	7	1	0	1	0	0	0	0	0	0	1	50	33	29	48	26	0	0	68	0
1	0	0	0	0	0	M	64	23.94	1	50	0	0	0	108	110	73	4.33	94	3.1	15200	6.7	65	2.52	157	0	1	4	4	0	1	0	0	1	0	0	0	0	54	33	30	49	29	0	0	1	1
1	0	0	0	0	1	F	78	22.89	0	72	3	0	0	80	123	81	5.33	140	1.087	3824.55	12.32	13	2.64	158	1	1	4	2	1	1	1	0	2	1	0	0	0	44	42	28	58	27	0	1	5	1
0	0	0	1	0	0	M	66	22.86	1	109	0	0	0	79	108	64	9.4	143	2.62	1986.98	6.72	30	3.2	160	1	1	4	1	0	0	0	0	0	0	0	0	1	50	30	34	51	34	0	0	92	0
0	0	0	1	0	0	M	71	27.72	1	120	7	0	1	74	170	100	5.89	139	0.796	2365.35	4.87	19	2.56	160	1	1	4	1	0	1	0	0	3	1	3	0	0	52	52	42	56	38	0	1	98	0
0	0	0	1	0	0	M	81	20.2	1	118	5	0	0	69	125	58	10.93	164	0.001	2413.91	5.95	49	4.34	161	1	1	5	2	0	0	0	0	0	0	1	0	0	50	33	27	41	25	1	0	78	0
0	0	0	1	0	0	M	63	23.12	1	133	7	0	0	75	139	75	8.84	178	3.153	1928.97	5.65	45	1.7	162	0	1	4	2	0	1	0	0	0	0	0	0	0	71	35	33	47	30	0	0	69	0
0	0	0	1	0	0	M	53	23.94	1	121	3	0	0	103	86	86	16.98	158	16	4840	6.7	144	2.52	162	0	1	4	2	1	0	0	1	1	0	0	0	0	54	33	30	49	29	0	1	1	1
0	0	0	1	1	0	M	60	23.36	1	162	0	0	0	62	80	50	19.74	205	16	15000	25.84	122	3.11	163	1	1	7	4	1	0	0	0	1	0	0	0	0	54	33	30	49	29	0	1	32	1
0	0	0	1	0	0	F	76	22.48	0	105	5	0	0	72	131	76	9.92	166	1.75	2399.2	12.77	15	5.17	164	0	1	4	3	1	1	0	0	2	0	1	1	0	73	33	31	42	29	0	0	2	1
0	0	0	1	1	0	M	54	22.76	0	130	5	0	0	68	84	52	9.59	370	1.48	912.87	5.82	67	2.61	164	1	1	5	1	0	0	0	0	0	0	1	0	1	71	29	27	52	26	0	0	75	0
0	0	0	0	1	0	M	59	23.03	1	125	5	1	0	114	141	89	7.01	153	2	17700	5.91	51	1.95	164	0	1	4	3	0	0	0	0	1	0	1	0	0	46	34	29	54	28	0	1	66	0
1	0	0	0	0	0	M	81	20.94	1	114	4	0	0	62	162	74	5.59	198	0.789	2240.47	5.51	26	2.5	165	0	1	5	2	0	1	0	0	1	0	0	1	0	65	35	27	43	24	0	0	75	0
1	0	0	0	1	0	M	73	27.34	1	164	3	0	0	90	140	88	11.87	289	0.943	14069.4	5.55	49	2.79	165	0	1	4	1	1	1	0	0	1	0	0	0	0	35	37	31	66	30	0	0	52	0
1	0	0	0	0	0	M	63	30.48	0	128	2	0	0	70	120	80	12	57	0.553	2641.03	6.79	32	2.54	166	0	1	4	3	0	0	0	0	1	0	0	0	0	54	33	30	49	29	0	0	1	1
0	0	0	1	0	0	M	83	23.38	1	139	5	0	0	102	118	80	9.8	191	16	7271.11	8.87	39	2.62	166	1	1	4	1	0	1	0	0	1	1	1	1	0	38	42	28	62	29	0	1	105	1
1	0	0	0	0	1	M	80	24.22	0	139	1	0	0	63	126	60	9.91	163	0.266	5118.29	5.88	19	2	167	0	1	4	1	0	0	0	0	1	0	0	0	0	54	33	30	49	29	0	0	70	0
0	0	0	1	0	0	F	71	25.72	0	99	4	0	0	55	170	70	13.6	212	0.213	8457.61	11.99	20	2.93	167	0	1	4	1	1	1	1	0	2	0	0	0	0	48	39	31	56	26	0	0	8	1
0	0	0	1	0	0	M	80	23.94	0	147	1	0	0	101	136	69	14.26	95	0.17	35000	5.88	45	1.88	168	0	1	2	4	0	1	0	0	1	0	1	0	0	56	32	32	43	30	0	0	1	1
1	0	0	0	1	1	M	66	23.6	1	118	5	0	0	78	120	80	10.28	267	12.659	6898.23	7.36	54	1.97	168	0	1	4	2	0	0	0	1	0	0	1	0	0	28	40	32	64	28	0	0	5	1
0	0	0	1	0	0	F	46	24.97	0	97	1	0	0	83	121	63	13.36	903	1.256	2638.76	7.37	12	3.02	169	1	1	4	1	1	0	0	0	0	0	0	0	0	54	33	30	49	29	0	0	6	1
0	0	0	1	0	1	M	64	15.79	1	105	1	0	0	84	137	79	8.95	288	0.169	532.12	4.67	16	1.92	172	1	1	4	1	0	0	0	0	1	0	0	0	0	46	32	29	42	27	0	0	61	0
1	0	0	0	1	0	M	83	21.78	1	130	0	0	0	42	128	76	9.48	212	14.002	2914.78	6.7	45	2.52	176	0	1	4	3	0	0	0	0	1	0	0	0	0	54	33	30	49	29	0	0	35	1
1	0	0	0	0	0	M	52	23.94	1	75	0	0	0	126	82	42	16.4	156	25	3540	27.81	92	1.42	176	1	1	4	4	1	1	0	1	1	0	0	0	0	54	33	30	49	29	0	1	4	1
0	0	0	1	0	0	F	70	24.54	0	93	7	0	0	70	160	80	9.77	282	4.088	1025.51	12.5	7	2.42	177	0	1	4	2	1	1	1	0	1	0	0	0	0	54	33	30	49	29	0	0	1	1
1	1	0	0	0	0	M	71	17.44	1	123	5	0	0	60	96	64	11.63	186	2.816	4051.51	7.18	25	1.69	179	1	1	4	1	0	1	0	0	1	1	2	0	0	45	36	39	50	32	0	0	50	1
0	0	0	1	1	0	F	69	25.68	0	98	5	0	0	101	141	99	13.33	326	1.704	15000	5.64	4	1.44	180	0	1	4	3	0	1	0	0	2	1	2	0	0	40	35	31	43	27	0	1	22	1
0	0	0	1	0	1	M	89	23.94	0	101	0	0	0	97	112	70	2.94	135	6.299	2827.53	4.92	19	1.38	181	0	1	2	1	1	1	0	1	1	0	0	0	0	54	33	30	49	29	0	0	1	1
0	0	0	1	1	0	M	78	23.94	0	123	0	0	0	75	132	82	15.5	182	4.95	9490	8.11	89	1.83	187	0	1	7	4	0	1	1	0	1	0	0	0	0	54	33	30	49	29	0	0	1	1
0	0	0	1	0	0	F	59	22.39	0	86	0	0	0	52	110	50	3.23	171	0.266	2473.24	5.02	111	2.58	188	0	0	4	4	0	1	0	1	1	1	1	1	0	66	33	27	48	25	0	1	2	1
1	0	0	0	0	0	M	71	23.94	1	112	1	0	0	96	118	71	11.33	143	16	15000	7.16	75	1.04	190	0	1	4	3	1	1	1	0	1	0	0	0	0	54	33	30	49	29	0	0	1	1
0	0	0	1	0	0	M	69	23.88	0	102	7	1	0	69	125	70	7.96	216	0.728	2938.33	3.91	27	1.5	193	1	1	4	1	1	1	0	0	1	0	1	1	0	66	35	30	47	30	0	0	58	0
1	0	0	0	0	0	F	72	24.24	0	74	7	0	0	84	122	68	7.57	323	0.44	6272.05	5.13	12	2.6	194	0	1	5	3	1	1	0	0	3	1	1	0	0	40	44	34	63	35	0	0	34	1
1	0	0	0	0	0	M	48	24.8	1	170	6	0	0	92	175	115	11.13	153	3.93	386.06	4.52	33	2.94	195	0	1	4	1	0	1	1	0	0	1	1	0	0	66	27	31	39	27	0	0	71	0
0	0	0	1	0	0	M	61	27.68	1	94	7	0	1	102	149	85	5.83	229	0.139	393.55	10.22	13	2.39	198	0	1	4	2	1	1	1	0	1	0	0	0	0	54	33	30	49	29	0	0	59	0
1	0	0	0	0	0	M	49	22.1	1	63	4	0	0	71	178	90	3.99	495	1.123	5070	3.31	45	2.52	198	0	1	0	2	0	1	1	0	0	1	1	0	0	65	35	31	51	30	0	0	10	1
0	0	0	1	0	0	F	75	25.91	0	100	4	0	0	82	177	85	7.3	166	9.709	15000	7.22	7	1.67	200	1	1	4	3	1	1	0	0	0	0	0	0	0	70	34	30	43	33	0	0	72	0
0	0	0	1	0	0	M	69	24.57	1	81	7	0	0	91	166	98	8.6	148	5.474	828.71	7.89	20	3.33	203	0	1	4	1	1	1	0	0	0	0	0	0	1	63	37	31	47	30	0	0	98	0
0	0	0	1	0	1	M	51	26.22	1	151	7	0	0	69	140	91	11.7	182	16	5788.3	5.69	69	2.86	206	1	1	5	1	0	1	0	0	1	1	0	0	1	59	43	31	45	28	0	0	63	0
1	0	0	0	0	0	M	73	28.28	1	92	3	0	0	65	110	66	9.97	166	1.13	585.07	3.68	17	1.64	207	1	1	4	1	0	0	0	0	0	0	0	0	1	60	36	33	47	35	0	0	50	0
0	0	0	1	0	0	M	67	24.8	1	127	0	0	0	88	109	69	7.79	163	0.01	1713.92	7.06	21	3	209	0	1	4	4	0	0	0	0	1	0	0	0	0	54	33	30	49	29	0	0	60	0
1	0	0	0	0	0	M	81	21.8	1	111	5	0	0	43	112	76	6.48	144	2.233	1313.5	11.38	44	0.98	210	1	1	4	1	1	1	0	0	0	1	1	0	0	52	30	30	36	30	0	1	53	0
0	0	0	1	0	0	F	77	23.94	0	87	3	0	0	72	112	72	10.72	235	0.4	18700	6.7	57	2.49	212	0	1	4	4	1	1	0	0	1	0	0	0	0	54	33	30	49	29	0	0	1	1
0	0	0	0	1	0	F	79	23.94	0	98	1	0	0	87	192	87	10.64	187	0.9	5910	6.7	25	1.92	217	0	1	4	4	0	1	0	0	1	0	0	0	0	54	33	30	49	29	0	0	1	1
0	0	0	1	0	0	M	68	23.83	1	141	2	1	0	96	178	96	9.36	257	0.732	365.07	6.7	26	2.53	218	0	1	4	2	0	1	1	0	0	1	1	0	0	69	35	30	48	29	0	1	79	0
0	0	0	0	1	1	M	80	21.26	0	141	5	0	0	106	123	79	9.58	77	16	6665.09	10.19	49	2.52	219	1	1	4	2	0	0	0	0	1	1	1	0	0	39	25	30	43	28	0	0	19	1
0	0	0	1	1	1	F	79	20.89	0	103	0	0	0	88	170	100	10.75	226	2.332	1123.49	6.7	7	3.5	222	0	1	4	2	0	1	1	0	1	0	0	0	0	54	33	30	49	29	0	0	2	1
0	0	0	1	0	0	M	88	25.39	1	136	5	0	0	75	106	62	8.79	123	16	4420.45	5.47	30	0.13	223	0	1	7	3	0	0	0	0	0	1	0	0	0	48	26	27	43	27	0	0	3	1
0	0	0	1	0	0	M	71	21.47	1	128	5	0	1	95	170	100	10.13	226	5.197	3893.3	4.94	16	1.69	223	0	1	4	2	0	1	0	0	2	1	2	0	0	32	39	33	62	33	0	0	58	1
1	0	0	0	0	0	M	81	24.91	0	82	5	0	0	90	112	77	6.1	142	2.443	10194.1	5.36	45	1.34	232	0	1	7	2	1	1	0	0	1	0	0	0	0	54	33	30	49	29	0	1	10	1
0	0	0	1	0	0	M	82	17.72	1	109	2	0	0	67	179	80	5.34	201	0.082	4020	4.61	59	2.52	235	0	1	4	1	0	1	0	0	1	0	0	0	0	54	33	30	49	29	0	0	13	1
1	0	0	0	1	0	M	72	23.15	0	112	6	0	0	78	185	105	8.4	183	2.52	1700.97	6.7	102	2.03	243	0	1	3	1	0	1	0	0	0	0	1	1	1	65	30	29	50	25	0	0	75	0
0	0	0	1	1	1	F	67	19.92	0	130	6	0	0	90	104	61	13.17	86	1.017	2935.44	20.77	16	2.56	246	0	1	4	1	1	0	1	0	1	0	0	0	0	54	33	30	49	29	0	0
1	0	0	0	0	0	M	72	23.74	1	111	5	0	0	68	145	85	9.48	145	14.983	2466.05	5.08	46	2.25	248	0	1	5	1	0	0	0	0	1	1	1	0	0	52	39	32	51	31	0	0	65	0
1	0	0	0	0	0	F	62	28.16	0	88	2	0	0	80	147	66	9.65	220	0.712	8090.34	4.02	15	2.66	268	0	1	4	3	1	1	0	0	1	0	0	0	0	46	37	32	50	34	0	0	55	0
0	0	0	1	0	0	M	68	29.41	0	109	6	0	0	85	158	85	11.57	138	16	12659.2	8.26	21	1.09	270	0	1	4	3	1	1	0	0	0	1	0	0	0	57	30	29	49	24	0	1	4	1
