# Supplementary material for: Development and validation of a novel risk score to predict 5-year mortality in patients with acute myocardial infarction in China: a retrospective study
Source: PeerJ. 2022 Jan 4;10:e12652. doi: 10.7717/peerj.12652 (PMC8740514; doi:10.7717/peerj.12652)
Supplement: Supplemental Information 17 — Abbreviations: AMI, acute myocardial infarction; IQR, interquartile range; BMI, body mass index; STEMI, ST segment elevation myocardial infarction; Door-to-Balloon time, Time from hospital arrival to first balloon inflation; HR, heart rate; WBC, white blood cell; Hb, hemoglobin; PLT, platelet; ALT, alanine transaminase; Cr, creatinine; FBG, fast blood glucose; LDL-C, low-density lipoprotein cholesterol; NT-proBNP, N-terminal pro-brain natriuretic peptide; cTnI, cardiac Troponin I; MI, myocardial infarction; PCI, percutaneous transluminal coronary intervention; AF, atrial fibrillation; LVEF, left ventricular ejection fraction; LA, left atrial; LVDd, left ventricular end-diastolic diameter; RA, right atrial; RV, right ventricular; LV, left ventricular; Antiplatelets, aspirin, clopidogrel, ticagrelor; Antihypertensives, angiotensin-converting enzyme inhibitor, angiotensin receptor blocker, calcium-channel blocker, β-receptor blocker; CABG, coronary artery bypass grafting. [file peerj-10-12652-s017.xlsx]

## Sheet: Data of Validation Cohort
ST segment depression	Prior PCI	Prior MI	STEMI	Acute Anterior MI	Door-to-door time<4h	gender	Age	BMI	Smoke	Hb	antihypertensiondrugs	Left main coronary lesion	Atrial Fibrillation	Heart Rate	Admission Systolic Blood Pressure	Admission Diastolic Blood Pressure	WBC	PLT	cTnI	NT-proBNP	FBG	ALT	LDL-C	Cr	PCI	Statins	Antiplateletdrugs	Killip	Diabetes	Hypertension	Stroke	Cardiac Arrest	Mitral Regurgitation	Aortic Regurgitation	Tricuspid Regurgitation	Pulmonic Regurgitation	Left Ventricular Compliance Decreased	LVEF	LA	RA	LVDd	RV	CABG	Coronary multivessel lesion	Survival Time	Death
1	1	1	0	0	0	M	71	24.77	0	132	5	0	0	74	130	70	6.81	253	4.9	2600	5.9	30.5	2.19	162	0	1	5	2	1	1	1	0	0	0	0	0	1	50	35	35	49	19	0	0	19	1
1	0	1	0	0	0	F	77	20.82	0	131	5	0	0	60	100	60	11.39	253	1.92	2426	5.35	24.9	1.64	69	0	1	4	2	0	0	1	0	1	0	1	0	1	51	30	35	49	19	0	0	84	0
1	0	1	0	0	0	M	84	23.44	0	115	3	0	0	96	148	76	9.05	191	0.227	4722	4.52	69.8	2.41	72	0	1	4	2	0	0	1	0	2	1	1	0	1	42	37	35	51	19	0	0	56	0
1	0	1	0	0	0	F	44	23.42	0	114	0	0	0	124	153	114	8.35	153	4.28	3318	19.52	31.4	4.4	81	0	1	1	1	1	0	0	0	1	1	1	0	1	64	35	35	49	19	0	0	54	0
1	0	1	0	0	0	M	53	28.07	1	141	7	0	0	80	150	90	7.96	263	0.014	1500	6.58	41.6	2.34	91	1	1	4	1	0	1	0	0	1	0	1	0	1	53	35	35	50	19	0	0	47	0
1	0	1	0	0	0	M	61	24.22	1	115	5	1	0	83	141	80	7.94	173	9.04	2587	5.1	45	4.98	108	1	1	4	2	0	1	1	0	1	0	0	1	0	58	28	30	48	27	0	1	55	0
1	0	1	0	0	0	F	50	23.42	0	161	5	1	0	103	115	75	6.26	95	0.339	10951	11.35	20.3	3.78	160	1	1	4	3	1	1	0	0	1	0	1	0	1	45	36	29	45	17	0	1	48	1
1	0	0	0	0	0	F	53	31.25	0	118	5	0	0	90	180	100	9.72	182	0.933	440	16.81	11.6	2.5	42	0	1	4	1	1	1	0	0	1	0	1	0	1	73	31	38	45	19	0	0	46	0
1	0	0	0	0	0	M	53	18.36	1	146	0	0	0	70	100	60	11.65	264	0.012	500	5.95	41.6	1.65	43	1	1	4	1	0	0	0	0	1	0	0	0	1	41	33	31	53	13	0	0	45	0
1	0	0	0	0	0	M	68	23.42	1	107	5	0	0	71	136	95	11.75	241	0.063	466	4.67	11.7	2.77	47	0	1	4	1	0	1	0	0	2	0	0	0	1	67	36	30	41	18	0	0	49	0
1	0	0	0	0	1	F	65	23.42	0	110	5	1	0	72	160	78	12.72	163	0.62	190	9.85	15.7	3.9	47	1	1	4	1	0	1	0	0	1	0	1	0	1	52	40	36	46	19	0	0	50	0
1	0	0	0	0	0	F	78	23.42	0	143	0	0	0	78	120	80	22.51	137	64	3600	11.22	77.1	2.73	51	1	1	4	2	1	1	1	0	1	0	1	0	1	45	35	35	48	19	0	0	48	0
1	0	0	0	0	0	M	51	26.7	0	136	7	0	0	70	140	90	7.34	168	1.18	18	10.21	11.2	3.05	51	1	1	4	1	0	1	0	0	0	0	0	0	1	51	35	35	49	19	0	0	47	0
1	0	0	0	0	0	F	63	24.03	0	100	7	0	0	82	140	90	5.68	201	4.02	2587	14.31	20.6	2.71	52	1	1	4	1	1	1	0	0	1	1	1	0	1	47	37	35	47	23	0	0	59	0
1	0	0	0	0	0	F	48	23.8	0	162	0	0	0	80	154	95	7.18	216	0.08	828	4.69	30.8	1.85	53	1	1	4	1	0	0	0	0	0	0	0	0	1	51	35	35	49	19	0	0	75	1
1	0	0	0	0	0	M	63	22.99	2	157	5	0	1	81	180	130	6.53	169	0.395	281	6.3	55.1	2.54	53	1	1	4	1	0	0	0	0	1	0	1	0	1	44	35	35	50	19	0	0	67	0
1	0	0	0	0	0	F	57	23.42	1	136	0	0	0	93	149	105	13.27	236	0.538	4100	15	27.4	3.79	53	1	1	1	1	1	0	0	0	1	0	0	0	1	38	35	35	51	19	0	0	44	0
1	0	0	0	0	0	M	74	22.68	1	123	5	0	0	119	151	110	7.07	165	0.419	5500	6.86	19.9	3.68	53	1	1	4	3	1	1	0	0	1	0	1	0	1	23	35	30	57	16	0	0	45	0
1	0	0	0	0	0	F	76	23.42	0	107	7	1	0	79	140	70	5.2	156	0.214	144	7.28	38.8	3.07	53.8	1	1	4	1	0	1	0	0	0	1	0	0	1	53	31	36	50	17	0	0	75	0
1	0	0	0	0	0	F	62	23.42	0	137	1	0	0	78	130	80	9.14	167	0.165	32	7.94	14.7	2.56	54	1	1	4	1	1	0	0	0	0	1	1	0	1	53	35	35	43	19	0	0	57	0
1	0	0	0	0	0	F	64	28.84	0	154	6	0	0	84	154	94	7.23	134	0.154	686	5.47	18.2	2.65	54	1	1	4	1	0	1	0	0	0	0	1	0	0	47	31	37	47	21	0	0	54	0
1	0	0	0	0	0	F	82	27.64	0	146	5	0	1	62	130	74	8.71	314	64	1111	9.16	55.7	2.68	54.9	1	1	4	2	0	1	0	0	1	1	1	0	1	40	38	37	42	19	0	0	50	0
1	0	0	0	0	0	F	70	16.66	0	153	5	0	0	94	135	68	5.77	246	0.243	269	4.6	47.4	1.61	55	0	1	5	2	0	1	0	0	1	1	1	0	1	69	35	35	42	19	0	0	5	1
1	0	0	0	0	0	F	58	23.42	0	132	1	0	0	97	155	95	7.89	347	0.318	504	6.86	28.5	3.9	55	0	1	4	2	0	1	0	0	1	0	1	0	1	68	35	35	43	19	0	0	60	0
1	0	0	0	0	0	F	61	20.78	0	132	5	1	0	83	136	80	7.42	330	0.28	421	12.02	9.2	2.9	55	1	1	4	2	1	1	0	0	1	1	0	0	1	50	35	35	47	19	0	1	46	0
1	0	0	0	0	0	F	49	23.23	0	137	3	1	0	55	170	90	11.42	213	1.45	59	5.05	34.9	2.64	55	0	1	4	1	0	1	0	0	2	0	0	0	1	51	33	35	49	19	0	0	90	0
1	0	0	0	0	1	M	67	18.59	1	151	7	0	0	80	95	53	13.42	227	2.03	5813	6.06	53.1	1.35	55	0	1	4	2	0	1	1	0	1	0	1	0	1	51	33	36	49	19	0	0	67	0
1	0	0	0	0	0	F	74	24.22	0	116	2	0	0	120	150	100	8.43	156	0.162	851	7.65	9.7	1.15	55	1	1	4	2	0	1	0	0	1	1	1	0	1	42	35	35	53	19	0	0	88	0
1	0	0	0	0	0	F	64	27.53	0	146	7	0	0	68	140	80	5.77	132	0.015	412	5.18	15.4	3.45	55.1	1	1	4	1	0	1	0	0	1	0	1	0	1	57	36	36	48	20	0	0	64	0
1	0	0	0	0	0	F	52	24.97	0	139	5	0	0	78	130	80	5.69	201	0.546	2587	4.56	24.8	2.43	55.8	1	1	4	2	0	1	0	0	1	1	1	0	1	40	35	35	57	17	0	0	88	0
1	0	0	0	0	0	F	61	23.42	0	128	5	0	0	71	130	72	5.71	204	0.165	223	5.78	46	2.16	56	1	1	5	1	0	0	0	0	2	0	1	0	1	48	35	35	43	19	0	0	81	0
1	0	0	0	0	0	F	72	22.07	0	139	5	0	0	82	130	80	11.37	205	0.074	616.5	4.49	23.8	3.16	56	1	1	4	1	0	1	0	0	1	0	1	0	1	51	35	35	49	19	0	0	62	0
1	0	0	0	0	0	M	72	23.42	1	108	0	0	1	58	116	70	16.31	269	15	2587	5.83	26.7	1.94	56	1	1	4	2	0	1	0	0	1	1	2	0	1	42	39	39	57	18	0	0	54	0
1	0	0	0	0	0	M	48	24.22	1	123	2	0	0	78	166	108	10.11	173	0.055	222	5.9	9.7	3.55	56.7	1	1	4	2	0	1	0	0	1	1	1	0	0	35	35	35	57	19	0	0	65	0
1	0	0	0	0	0	F	41	23.94	0	147	3	0	0	86	144	90	5.3	106	0.101	1400	5.63	37	2.77	57	0	1	4	1	0	0	0	0	1	0	0	0	0	47	31	29	48	16	0	0	50	0
1	0	0	0	0	1	M	46	24.22	0	153	7	0	0	82	111	70	11.1	241	0.053	1059	11.37	57.9	1.3	57	1	1	4	1	0	1	0	0	1	1	1	0	0	40	35	35	57	19	0	0	91	0
1	0	0	0	0	0	F	76	23.42	0	147	5	1	0	78	130	70	9.34	203	0.1	72	6.56	35	1	58	1	1	4	1	0	0	0	0	0	0	0	0	1	61	25	31	42	20	0	0	64	0
1	0	0	0	0	0	M	81	20.96	1	104	5	0	0	90	120	80	4.61	133	0.078	5700	5.27	5.7	2.22	58	0	1	4	1	0	1	0	0	1	1	1	0	1	35	35	30	55	18	0	0	26	1
1	0	0	0	0	0	F	64	20.55	0	143	7	0	0	80	160	90	8.57	162	0.327	3234	3.97	33	3.74	59	1	1	4	1	0	1	0	0	1	0	0	0	1	51	30	30	49	18	0	1	63	0
1	0	0	0	0	1	M	79	24.98	2	113	1	0	0	90	128	92	5.45	120	0.562	3572	5.91	11.2	1.78	59	1	1	4	2	0	1	0	0	1	1	1	0	1	35	27	35	54	18	0	0	64	0
1	0	0	0	0	0	F	68	25.96	0	125	7	0	0	85	150	90	8.76	122	0.139	2587	12.93	16.4	2.77	59.4	1	1	4	1	0	1	0	0	1	1	1	0	1	65	46	37	41	18	0	0	70	0
1	0	0	0	0	0	M	46	24.45	1	121	5	0	0	78	110	70	4.05	199	0.112	1529	7.43	13.4	1.57	60	1	1	1	2	0	1	0	0	0	0	0	0	0	30	35	35	57	19	0	0	51	0
1	0	0	0	0	1	F	58	24.32	0	125	5	1	0	78	120	80	5.9	126	0.316	331	5.9	12.8	2.3	61	1	1	4	1	0	0	0	0	1	1	1	0	1	60	29	29	43	16	0	0	85	0
1	0	0	0	0	0	M	62	21.3	0	150	7	0	0	70	120	80	8.21	128	2.86	441	5.68	34.7	1.77	61	1	1	4	1	0	1	0	0	1	1	1	0	1	45	35	35	49	19	0	0	91	0
1	0	0	0	0	0	M	63	20.76	1	127	7	0	0	74	120	70	5.19	102	1.38	2587	6.26	13.2	3.66	61	1	1	4	1	0	1	0	0	1	0	1	0	1	45	35	35	55	19	0	0	69	0
1	0	0	0	0	1	F	71	18.9	0	162	5	0	0	70	110	60	11.45	217	0.197	8469	4.88	19.2	2.37	61	0	1	4	2	0	1	0	0	2	1	1	0	1	39	47	34	71	20	0	0	27	1
1	0	0	0	0	0	M	50	23.42	1	137	5	0	0	90	134	73	9.15	244	0.118	2515	4.83	30.7	0.67	61.6	1	1	4	1	0	0	0	0	1	1	0	0	1	42	30	33	45	18	0	0	77	0
1	0	0	0	0	1	F	70	23.44	0	106	5	0	0	93	110	70	24.51	386	0.216	8493	10.69	27.8	2.45	62	1	1	4	3	1	1	0	0	2	1	1	0	1	44	35	35	54	19	0	0
1	0	0	0	0	1	M	68	24.8	1	138	1	1	0	105	120	83	16.08	160	35	4395	7.57	34.1	2.95	62.5	0	1	4	1	1	0	0	0	2	1	1	0	1	66	35	35	47	19	0	0	1	1
1	0	0	0	0	0	M	64	22.49	1	120	6	0	0	77	134	80	11.01	232	0.85	2310	6.86	23.2	2.77	63	1	1	4	4	0	1	0	0	1	1	1	0	1	60	33	35	53	19	0	0	65	0
1	0	0	0	0	0	F	71	17.9	2	134	0	0	0	50	120	70	8.92	150	0.323	350	5.54	17.2	2.6	64	1	1	4	1	0	0	0	0	1	0	1	0	0	53	36	34	42	20	0	0	70	0
1	0	0	0	0	0	F	72	26.67	0	120	0	0	0	92	160	80	7.08	71	0.328	326	12.25	39.5	3.24	64	1	1	4	1	1	0	0	0	1	0	1	0	1	51	36	36	49	19	0	0	58	0
1	0	0	0	0	1	M	63	23.38	0	103	5	1	0	77	130	90	6.21	139	2.01	943	5.21	12.4	2.95	64	1	1	4	2	0	0	0	0	1	0	1	0	1	50	35	35	50	19	0	1	54	0
1	0	0	0	0	1	M	50	19.49	1	154	6	0	0	73	98	70	12.78	223	0.162	670	4.79	18.9	4.39	64	1	1	4	2	0	0	0	0	0	0	0	0	1	55	35	35	55	19	0	0	53	0
1	0	0	0	0	0	M	68	23.42	1	111	5	0	0	86	165	95	6.01	156	1.77	363	4.27	16.4	3.44	64.9	1	1	4	2	0	1	0	0	1	0	0	0	1	38	39	39	56	17	0	0	65	0
1	0	0	0	0	0	M	47	23.42	2	116	5	1	0	76	128	70	5.67	191	0.928	153	5.82	17.5	3.68	65	1	1	4	2	0	0	0	0	1	1	1	0	1	40	33	34	55	17	0	0	53	0
1	0	0	0	0	0	F	66	23.42	0	115	5	0	0	80	110	60	10.13	169	3.21	349	7.5	29.3	3.11	65	1	1	4	4	0	1	0	0	1	0	0	0	1	25	39	33	56	18	0	0	40	1
1	0	0	0	0	0	F	77	24.73	0	160	5	0	0	75	130	90	5.38	123	0.154	100	5.81	33.7	2.46	66	0	1	4	1	0	0	0	0	0	0	1	0	1	59	28	34	45	19	0	0	61	0
1	0	0	0	0	0	M	48	23.42	1	127	7	0	1	55	110	70	11.89	211	2.03	740	5.74	46.2	2.84	66	1	1	4	2	0	1	0	0	1	0	1	0	1	58	36	35	45	18	0	0	48	0
1	0	0	0	0	0	F	75	21.64	0	106	1	0	1	76	160	120	19.04	157	7.86	2587	6.82	64.6	2.59	66.6	0	1	4	3	0	1	0	0	1	0	1	0	1	40	35	35	49	19	0	0	1	1
1	0	0	0	0	0	F	69	25.04	1	158	2	0	0	71	150	90	5.39	212	0.175	165	8.56	10	3.18	67	1	1	4	1	0	1	0	0	0	0	0	0	1	57	36	30	43	20	0	0	66	0
1	0	0	0	0	0	F	53	23.71	0	156	3	0	0	80	150	80	7.62	233	0.118	288	5.93	11.4	2.64	67	1	1	4	2	1	0	0	0	1	0	0	0	1	58	30	40	46	20	0	0	60	0
1	0	0	0	0	0	M	58	18.42	1	129	1	0	0	79	120	72	8.02	180	4.245	76	5.11	19	3.4	67	0	1	4	1	0	0	0	0	0	1	0	0	1	40	33	29	47	31	0	1	79	0
1	0	0	0	0	1	M	42	20.07	2	137	5	0	0	74	120	70	7.02	128	0.262	2200	5.25	16.5	3.06	67	0	1	4	1	0	1	0	0	1	0	1	0	1	60	35	33	51	17	0	0	46	0
1	0	0	0	0	0	M	69	24.03	2	102	5	0	0	83	130	77	9.43	148	1.95	100	5.36	11.6	2.16	68	1	1	4	1	0	1	0	0	0	0	1	0	0	54	31	32	43	18	0	0	3	1
1	0	0	0	0	0	M	54	23.42	1	148	5	0	0	100	120	72	8.07	194	0.135	721	5.01	21.9	2.45	68	1	1	4	1	0	0	0	0	1	0	1	0	1	57	30	20	46	18	0	0	64	0
1	0	0	0	0	0	M	57	23.42	1	121	5	0	0	51	90	50	4.43	248	0.074	220	6.33	49.9	3.18	68	0	1	4	1	0	1	0	0	0	0	1	0	1	55	38	34	47	26	0	0	50	0
1	0	0	0	0	0	M	58	24.77	2	146	7	0	0	48	160	80	8.24	155	0.034	2587	9.8	23.6	2.7	68	1	1	4	2	1	1	0	0	1	0	1	0	1	51	39	36	49	21	0	0	66	0
1	0	0	0	0	0	F	76	24.67	0	121	5	0	0	77	160	100	7.41	231	0.294	3418	4.77	13.9	6.05	68	1	1	5	2	0	1	0	0	1	1	0	0	1	51	32	32	49	17	0	0	93	0
1	0	0	0	0	0	M	81	23.42	0	87	3	0	0	65	120	70	9.23	172	0.5	1209	7.51	11.4	2.71	68.6	1	1	4	2	0	0	0	0	0	1	0	0	1	40	43	28	50	18	0	0	87	0
1	0	0	0	0	1	F	63	21.93	0	115	3	0	0	68	128	76	13.06	218	0.119	741	5.49	18.01	4.22	69	1	1	4	1	0	0	0	0	1	0	1	0	1	69	35	35	39	19	0	0	74	0
1	0	0	0	0	0	M	57	23.42	1	127	5	1	0	58	130	80	5.45	103	0.079	690	6.78	12	4.38	69	0	1	4	1	0	1	0	0	0	1	1	0	1	48	34	33	44	17	0	0	49	0
1	0	0	0	0	0	F	63	37.77	0	116	5	0	0	110	120	80	10.48	148	1.12	957	4.98	47.2	1.8	69	1	1	4	2	0	0	0	0	1	1	1	0	1	44	35	35	45	19	0	0	57	0
1	0	0	0	0	0	F	72	21.48	0	118	0	0	0	60	120	60	11.99	200	3.22	1838	6.86	41.6	2.77	69	1	1	4	1	0	0	0	0	2	0	2	0	1	51	25	33	49	17	0	0	76	0
1	0	0	0	0	0	F	59	28.13	1	155	5	0	0	87	155	97	9.18	155	1.73	58	9.7	26.5	2.77	69	1	1	4	1	1	1	0	0	1	0	1	0	1	40	30	36	53	17	0	0
1	0	0	0	0	0	F	60	31.25	1	147	5	0	0	74	116	83	14.7	319	5.41	486	4.71	75.8	3.4	69.1	1	1	4	1	0	1	0	0	1	1	0	0	1	36	36	37	60	17	0	0
1	0	0	0	0	0	M	68	23.42	0	125	0	1	1	82	135	80	14.74	166	7.58	1902	5.79	29.5	1.95	70	1	1	4	3	0	0	0	0	0	0	0	0	0	51	35	35	42	19	0	0	60	0
1	0	0	0	0	0	M	62	22.06	1	156	5	0	0	80	120	90	11.13	187	1.07	2456	4.89	41.6	3.41	70	1	1	4	2	0	0	0	0	0	1	0	0	1	33	36	33	46	20	0	0	67	0
1	0	0	0	0	1	M	57	23.42	2	126	1	0	0	80	140	95	7.63	188	0.221	2587	5.58	18.7	3.02	70	1	1	4	3	0	1	0	0	1	0	1	0	1	57	37	36	48	20	0	0	33	1
1	0	0	0	0	0	F	75	26.35	0	109	5	0	0	68	120	55	6.29	262	4.9	11582	7.32	47.3	1.74	70.6	0	1	4	2	0	1	0	0	0	1	2	0	1	35	36	35	47	18	0	0	16	1
1	0	0	0	0	0	M	50	23.42	1	131	2	0	0	96	140	90	10.01	152	0.024	1313	18.58	13	3.26	70.7	0	1	0	1	1	1	0	0	1	1	0	0	1	45	37	29	47	20	0	0	67	0
1	0	0	0	0	0	F	79	20.63	0	122	5	0	0	70	140	80	10.7	178	10	1500	4.55	42.7	1.23	71	1	1	4	1	0	0	0	0	2	1	1	0	1	60	33	39	46	17	0	0	48	0
1	0	0	0	0	0	F	72	23.42	0	112	1	0	0	88	145	88	7.52	166	0.69	15488	6.83	14.9	2.84	71	0	1	4	2	0	1	0	0	0	1	1	0	1	40	35	36	47	20	0	0	55	0
1	0	0	0	0	0	M	53	23.62	2	127	5	1	0	110	110	70	9.03	237	0.289	250	4.89	25	3.75	71	0	1	4	2	0	1	0	0	0	0	1	0	1	45	38	37	48	18	0	0	49	0
1	0	0	0	0	0	M	74	23.42	1	187	5	0	0	56	119	87	5.24	190	0.009	340	4.7	68.3	3.96	72	1	1	4	1	0	1	0	0	0	0	0	0	1	62	41	35	42	20	0	0	45	0
1	0	0	0	0	0	M	60	21.63	1	120	7	0	0	75	120	80	10.2	280	0.311	2587	9.83	9.1	2.22	72	1	1	4	2	1	1	0	0	2	1	1	0	1	53	36	31	48	16	0	0	59	0
1	0	0	0	0	0	F	70	24.34	0	142	2	0	0	80	155	95	4.3	212	0.054	2587	11.81	77.8	1.85	72	1	1	4	2	1	1	0	0	0	0	0	0	1	58	30	34	49	18	0	0	49	0
1	0	0	0	0	0	M	54	23.42	1	141	4	0	0	90	120	85	6.38	127	0.016	377	4.24	48.8	3.86	72	1	1	1	1	0	1	0	0	0	0	0	0	1	53	35	35	51	19	0	0	66	0
1	0	0	0	0	1	M	59	23.42	1	154	5	1	0	83	130	80	14.61	215	0.089	480	18.1	83.8	3.14	73	1	1	4	1	1	0	0	0	1	0	0	0	1	56	35	35	45	19	0	0	46	0
1	0	0	0	0	0	M	48	24.22	0	122	1	0	0	80	140	70	7.07	184	0.089	2587	11.23	41.6	3.81	73	1	1	4	1	0	1	0	0	1	0	1	0	1	45	43	40	50	19	0	0	65	0
1	0	0	0	0	1	M	63	21.61	2	94	5	0	0	63	142	95	6.61	123	0.324	1270	3.36	18.6	5.79	73	1	1	4	1	0	0	0	0	0	1	0	0	1	39	36	35	55	19	0	0	37	1
1	0	0	0	0	0	M	58	25.71	1	113	0	0	0	70	120	80	8.42	253	0.126	133	6.13	18.5	2.61	73.9	1	1	0	1	0	0	0	0	1	0	0	0	1	51	33	39	49	19	0	0	98	0
1	0	0	0	0	0	M	74	22.43	0	124	3	0	0	70	140	80	7.85	163	0.5	603	5.67	12.1	1.49	73.9	1	1	4	3	0	0	0	0	2	0	1	0	1	51	35	35	49	19	0	0	70	0
1	0	0	0	0	0	M	64	23.46	1	154	5	0	0	65	145	85	6.88	271	0.228	549	4.81	8.7	2.24	74	0	1	4	1	0	0	0	0	0	0	1	0	1	56	28	32	45	18	0	0	28	1
1	0	0	0	0	0	F	69	23.42	0	128	5	0	0	72	170	100	11.2	159	0.474	2618	4.65	41.6	4.83	74	1	1	4	1	0	1	0	0	1	1	1	0	1	58	39	34	45	18	0	0	68	0
1	0	0	0	0	0	M	47	25.24	2	107	5	0	0	105	120	70	7.3	326	0.028	1005	7.74	11.6	4.38	74	1	1	4	1	0	1	0	0	0	0	2	0	1	43	38	35	49	19	0	0	56	0
1	0	0	0	0	0	M	64	20.29	1	122	7	0	0	80	190	100	5.14	165	0.017	280	5.83	23.2	3.27	74	1	1	4	1	0	1	0	0	1	1	1	0	1	48	28	31	50	17	0	0	46	0
1	0	0	0	0	0	F	45	22.6	0	125	7	0	0	80	128	108	6.95	215	0.255	7708	16.83	17.7	3.05	74	1	1	2	1	1	1	0	0	1	1	1	0	1	45	35	35	50	19	0	0
1	0	0	0	0	0	F	73	26.04	0	111	3	0	0	62	140	70	9.83	204	3.36	254	4.55	31.8	3.08	75	1	1	4	1	1	1	0	0	1	0	1	0	1	79	38	36	49	13	0	0	84	0
1	0	0	0	0	0	M	65	23.42	0	123	5	0	0	56	145	100	6.4	240	1.2	1183	4.59	97.7	2.77	75	0	1	4	2	0	0	0	0	1	1	0	0	1	52	37	37	49	18	0	0
1	0	0	0	0	0	M	70	20.2	1	157	5	0	0	68	128	60	9.67	217	0.192	2587	8.49	32.8	3.15	75	0	1	4	2	0	0	0	0	0	0	0	0	1	40	27	35	50	20	0	0	24	1
1	0	0	0	0	1	M	66	23.42	2	127	7	0	0	80	120	80	10.36	198	0.232	556	7.38	30.7	1.47	75.2	0	1	4	2	1	1	0	0	0	1	1	0	1	46	28	30	49	19	0	0	3	1
1	0	0	0	0	0	F	72	27.55	1	112	5	1	0	62	105	60	4.98	164	0.108	192	4.56	5.6	2.73	75.6	1	1	4	2	1	1	0	1	1	0	1	0	1	42	47	36	50	17	0	1	1	1
1	0	0	0	0	0	F	81	23.42	0	99	5	0	0	119	121	58	12.56	294	2.56	18000	12.31	186.2	2.77	75.7	0	1	4	2	0	1	0	1	2	0	2	0	1	51	35	35	49	19	0	0	1	1
1	0	0	0	0	0	M	44	23.42	1	131	7	0	0	80	135	100	4.23	135	0.378	91	5.29	251.2	3.1	76	1	1	4	1	0	1	0	0	2	0	3	0	1	60	46	33	45	22	0	0	54	0
1	0	0	0	0	0	M	75	25.69	2	145	3	0	0	67	125	74	9.85	300	5.83	141	5.38	37.8	2.33	76	1	1	4	1	0	0	0	0	1	0	0	0	1	51	34	33	49	16	0	0	95	0
1	0	0	0	0	0	M	67	21.97	1	152	7	0	0	50	170	90	6.95	142	0.222	137	13.69	25.3	2.46	76.8	1	1	4	1	1	1	0	0	1	0	0	0	1	63	39	38	46	19	0	0	66	0
1	0	0	0	0	0	M	67	23.42	0	98	5	0	0	80	120	70	4.52	84	0.32	3424	5.52	26.2	2.85	77	1	1	4	1	0	0	0	1	1	0	1	0	1	48	38	33	45	18	0	0
1	0	0	0	0	0	M	67	29.38	1	139	1	0	0	85	165	100	10.11	293	0.008	250	11.64	36.7	3.99	77	1	1	4	1	0	1	0	0	0	1	0	0	1	51	28	36	49	18	0	0	44	0
1	0	0	0	0	0	M	67	23.42	1	115	2	0	0	82	130	90	8.15	117	2.24	2624	10.68	16	3.24	77	1	1	4	2	0	1	0	0	0	1	1	0	1	49	39	35	49	21	0	0	75	0
1	0	0	0	0	1	M	69	23.42	1	114	7	0	0	42	112	80	10.25	256	0.999	845	5.38	15.9	2.07	77	1	1	5	2	0	0	0	0	1	0	1	0	1	46	29	35	60	17	0	0	60	0
1	0	0	0	0	0	M	53	22.04	0	121	6	0	0	61	140	90	6.05	133	0.181	120	5.39	19.8	1.14	78	1	1	4	1	0	1	0	0	1	0	0	0	1	49	32	30	46	17	0	0	49	0
1	0	0	0	0	1	M	68	21.09	2	105	3	0	0	62	170	90	5.77	140	0.068	323	4.96	59.7	4.96	78	1	1	4	1	1	0	0	0	1	1	1	1	1	51	30	38	49	16	0	0	69	0
1	0	0	0	0	0	F	64	18.59	0	64	5	0	0	110	170	100	4.76	126	0.175	2587	6.86	16.8	2.77	78	0	1	2	2	1	0	0	0	1	0	2	0	1	51	36	35	49	20	0	0	58	0
1	0	0	0	0	1	F	75	14.79	1	146	0	0	0	91	110	60	7.56	210	0.162	5772	4.84	25.8	2.48	78	1	1	4	1	0	0	0	0	1	0	0	0	1	36	26	35	49	18	0	0	46	1
1	0	0	0	0	1	M	81	23.42	0	130	1	0	0	87	130	90	5.77	150	0.972	67.4	6.94	21.1	2.82	79	0	1	4	2	0	1	0	0	1	0	1	0	1	62	39	37	44	19	0	0	52	0
1	0	0	0	0	0	M	69	28.37	0	106	5	0	0	75	162	90	4.74	149	0.034	2587	11.38	16.6	5.09	79	1	1	4	1	1	1	0	0	0	0	2	0	1	68	42	38	46	16	0	0	55	0
1	0	0	0	0	0	M	61	27.68	0	133	7	0	0	75	154	74	9.26	197	0.735	37	5.97	13.1	3.28	79	1	1	4	1	0	1	0	0	1	0	1	0	1	51	33	33	49	18	0	0	76	0
1	0	0	0	0	0	M	58	25.39	0	125	0	0	0	60	106	78	9.75	190	0.134	470	4.36	23.4	0.98	79.2	1	1	4	1	0	1	0	0	1	0	0	0	1	40	38	31	50	21	0	0	76	0
1	0	0	0	0	0	M	52	26.89	1	120	5	0	0	63	136	85	9.32	147	0.994	167	8.8	27.3	0.99	79.6	1	1	4	1	0	0	0	0	1	0	1	0	1	63	35	35	42	19	0	0	77	0
1	0	0	0	0	0	M	79	26.17	1	94	3	0	0	62	113	76	4.23	137	0.034	4199	5.22	18.9	4.18	80	1	1	2	2	0	0	0	0	0	0	1	0	1	59	39	35	48	15	0	0
1	0	0	0	0	0	M	74	21.61	1	121	5	0	0	89	140	90	8.48	203	0.962	498	8.2	25.3	1.84	80	0	1	4	1	0	1	0	0	1	1	0	0	1	53	35	35	60	19	0	0	91	0
1	0	0	0	0	0	M	69	26.44	0	122	0	0	0	94	170	90	11.24	215	1.47	220	4.98	55	2.67	81	0	1	4	1	0	1	0	0	0	1	0	0	1	51	30	37	46	18	0	0	46	0
1	0	0	0	0	0	M	49	21.46	0	158	7	0	0	74	155	100	8.25	170	0.462	1390	5.12	22.7	2.77	81	0	1	4	2	0	1	1	0	1	0	0	0	1	51	35	35	49	19	0	0	97	0
1	0	0	0	0	1	F	87	23.42	0	123	1	0	0	75	110	60	9.86	181	0.206	8150	4.98	16.1	2.65	81	0	1	4	2	0	0	0	0	1	1	0	0	1	45	35	35	50	19	0	0	62	0
1	0	0	0	0	1	M	45	23.42	0	125	5	0	0	60	120	70	18.77	324	2.44	639	11.38	40.9	2.18	81.2	1	1	4	1	0	1	0	0	2	0	1	0	1	52	39	38	53	21	0	0	83	0
1	0	0	0	0	0	F	80	23.42	0	122	5	0	0	70	94	58	8.33	219	0.258	2558	6.68	41.6	2.09	82	1	1	4	4	0	1	0	0	1	1	0	0	1	36	42	34	40	20	0	0
1	0	0	0	0	0	M	52	24.79	2	114	5	0	0	83	110	80	6.81	264	0.73	1328	3.68	32.8	1.73	82	1	1	4	2	0	0	0	0	0	1	1	0	1	55	39	38	49	18	0	0	70	0
1	0	0	0	0	0	M	60	23.42	1	99	0	0	0	85	145	90	6.59	117	1.29	310	6.73	33.1	3.12	83	1	1	4	2	0	0	0	0	1	0	1	0	1	45	35	35	46	19	0	0	75	0
1	0	0	0	0	0	M	43	27.55	0	127	1	0	1	70	160	96	8.16	121	1.74	163	6.9	13.7	2.97	83	1	1	4	1	1	0	0	0	1	0	1	1	1	43	37	39	49	20	0	0	77	0
1	0	0	0	0	0	M	83	19.83	1	114	5	1	0	80	137	78	8.51	190	0.786	4590	4.66	24.7	1.99	83.3	1	1	4	2	0	1	0	0	1	0	2	0	1	56	37	37	49	20	0	0	73	0
1	0	0	0	0	0	M	70	25.39	0	154	5	0	0	86	144	104	16.07	114	0.63	89	5.21	12.9	1.81	83.4	1	1	4	4	0	1	0	1	1	1	1	0	1	46	30	33	41	20	0	0	49	1
1	0	0	0	0	0	M	80	19.83	0	151	5	0	0	80	108	75	8.35	336	2.27	1594	5.34	52	3.4	84	1	1	4	2	0	1	1	0	1	0	1	0	0	52	31	27	41	31	0	0	73	0
1	0	0	0	0	0	F	76	25.33	0	130	5	0	0	68	130	80	9.96	195	0.117	2587	6.86	14.1	2.77	84.1	1	1	4	1	1	0	1	0	1	0	1	1	1	49	35	32	55	15	0	0	75	0
1	0	0	0	0	0	M	43	25.69	1	157	5	0	0	83	130	80	5.32	161	0.052	2587	6.37	28	2.26	85	0	1	4	1	0	1	0	0	1	0	0	0	1	62	32	33	48	16	0	0	63	0
1	0	0	0	0	0	M	79	23.42	2	147	5	0	0	60	130	80	7.47	178	0.644	2587	6.21	16	3.03	85	1	1	4	2	0	1	0	0	0	2	0	0	1	68	39	37	50	16	0	0	52	0
1	0	0	0	0	0	M	50	28.34	1	147	5	0	0	75	100	60	15.14	151	3.87	48	4.65	26.6	3.31	85.9	1	1	4	1	0	1	0	0	1	0	0	0	1	63	32	38	42	20	0	0	75	0
1	0	0	0	0	0	M	66	24.8	0	130	7	0	0	78	130	72	8.32	215	0.031	95	4.67	14.4	2.56	86	0	1	4	1	0	1	0	0	1	0	1	0	1	66	35	35	42	19	0	0	71	0
1	0	0	0	0	0	M	52	23.42	1	132	5	1	0	97	130	80	5.68	165	0.171	610	7.23	14.2	3.27	86	1	1	4	1	1	0	0	0	1	0	1	0	1	69	41	39	46	17	0	0	45	0
1	0	0	0	0	0	M	77	23.03	0	152	4	0	0	80	122	60	6.72	212	0.083	3367	5.21	10	1.37	86	1	1	4	2	0	1	0	0	1	1	0	0	1	43	38	32	49	18	0	0	65	0
1	0	0	0	0	1	M	52	21.11	1	153	6	0	0	64	120	90	11.38	198	0.172	500	4.08	35.9	1.89	86.1	1	1	4	1	0	1	0	0	1	1	0	0	1	60	35	35	51	19	0	0	79	0
1	0	0	0	0	1	M	34	20.8	2	137	4	1	1	50	90	60	9.7	146	0.051	2587	7.14	16.4	1.92	87	1	1	4	4	0	1	0	0	1	0	1	0	1	41	37	33	43	19	0	0	70	0
1	0	0	0	0	0	M	85	23.42	1	122	5	0	0	110	140	90	7.91	192	6.26	4268	3.77	39.1	2.36	87	1	1	4	3	0	0	0	0	0	0	0	0	1	49	36	35	53	19	0	0	1	1
1	0	0	0	0	0	M	61	26.37	0	135	5	0	0	80	130	80	5.82	246	0.092	3261	7.68	9.9	3.92	87.3	1	1	4	1	1	1	1	0	1	0	1	0	1	51	36	37	49	20	0	0	74	0
1	0	0	0	0	0	M	66	24.51	1	151	6	0	0	73	150	75	5.24	155	0.348	61	6.8	18.1	2.52	88	1	1	4	1	0	1	0	0	0	1	0	0	1	52	35	35	55	19	0	0	68	0
1	0	0	0	0	0	M	82	20.28	0	163	4	0	0	97	134	72	13.95	236	0.043	13330	7.14	11.8	1.61	88	0	1	2	1	0	1	0	0	1	1	1	0	1	45	28	24	65	16	0	0	63	0
1	0	0	0	0	1	M	58	21.8	1	169	7	0	0	75	120	70	12.33	215	1.51	834	7.05	38.2	4.37	89	1	1	4	1	0	1	0	0	1	0	0	0	1	44	37	33	45	19	0	0	54	0
1	0	0	0	0	0	M	72	23.42	2	103	5	0	0	63	134	80	12.23	172	3.27	669	5.95	40	3.79	89	1	1	4	2	0	0	1	0	1	1	0	0	1	55	33	34	52	18	0	0	54	0
1	0	0	0	0	1	M	75	23.42	1	92	5	0	0	87	110	75	7.66	111	3.9	198	5.19	15.5	2.16	89.8	0	1	4	2	1	1	0	0	2	1	0	0	1	63	42	33	40	18	0	0	77	0
1	0	0	0	0	0	F	72	18.73	0	123	7	0	0	101	102	70	6.25	238	0.12	3560	5.26	13.7	1.19	90	1	1	4	2	0	1	0	0	1	0	1	0	1	39	38	32	45	16	0	0	40	1
1	0	0	0	0	0	F	78	27.27	1	123	5	0	0	84	135	90	3.38	206	0.043	1269	4.92	57.2	2.79	90	0	1	4	1	0	0	0	0	1	0	1	0	1	51	35	35	49	19	0	0	66	0
1	0	0	0	0	0	M	74	25.71	0	135	6	0	0	118	200	130	10.71	132	0.281	5546	7.91	32.2	2.32	90	1	1	4	3	0	1	0	0	1	1	1	0	1	40	38	36	55	18	0	0	53	0
1	0	0	0	0	1	M	63	23.42	2	118	5	0	0	55	130	90	9.94	128	0.228	78	6.36	41.6	2.6	90.9	1	1	4	1	0	0	0	0	1	0	1	0	1	50	35	35	53	19	0	0	74	0
1	0	0	0	0	0	M	77	23.42	1	143	5	0	0	74	128	96	6.27	122	8.5	100	5.22	15.7	2.05	91	0	1	4	1	0	1	0	0	1	1	0	0	1	58	39	38	46	17	0	0	46	0
1	0	0	0	0	0	M	58	26.83	0	130	5	1	0	72	128	76	9.82	175	0.124	201	6.16	19.4	2.26	91.1	1	1	4	1	0	0	0	0	1	1	1	0	1	60	35	35	49	19	0	0	81	0
1	0	0	0	0	0	M	69	23.42	1	143	7	0	0	65	110	75	7.11	80	0.107	1974	3.9	47.1	1.35	92	1	1	0	2	0	1	0	1	1	0	0	0	1	52	36	34	45	19	0	0	68	0
1	0	0	0	0	0	M	65	23.42	1	142	5	1	0	65	110	65	8.02	163	0.387	3939	3.41	41.6	2.77	92	0	1	4	2	0	0	1	0	1	1	1	0	1	47	26	30	50	12	0	1	74	0
1	0	0	0	0	1	M	68	20.44	1	150	5	0	0	70	120	85	9.28	242	0.163	1068	4.64	24.6	2.19	92	0	1	4	1	0	1	0	0	1	0	1	0	1	59	39	36	55	18	0	0	11	1
1	0	0	0	0	0	M	48	25.08	1	110	5	0	0	105	170	110	7.96	105	1.04	3934	6.94	15	2.57	92	1	1	4	3	1	1	0	0	1	0	1	0	0	36	38	36	59	17	0	0	58	0
1	0	0	0	0	0	M	68	25.97	1	118	7	0	0	80	145	86	5.39	177	0.022	164	13.29	13.5	3.4	92.1	1	1	4	1	1	1	0	0	1	0	0	0	1	53	37	38	54	19	0	0	91	0
1	0	0	0	0	1	M	60	24.22	2	123	5	0	0	70	120	70	5.8	210	0.222	14	13.57	19.5	3.1	92.9	1	1	4	1	1	0	0	1	0	1	0	0	1	67	27	36	49	17	0	0	72	0
1	0	0	0	0	0	M	75	23.42	1	149	5	0	0	90	125	75	15.33	239	0.447	521	5.34	23.7	1.51	93	0	1	4	2	0	1	0	0	1	1	1	0	1	51	36	34	49	19	0	0	74	0
1	0	0	0	0	0	M	82	23.14	1	116	3	0	0	84	110	80	5.39	143	7.4	538	5.01	18.4	2.93	93.3	1	1	4	1	0	0	0	0	1	1	0	0	1	55	32	31	51	19	0	0	65	0
1	0	0	0	0	0	F	77	22.67	0	113	5	1	1	78	140	70	8.62	164	0.367	187	5.24	12.4	5.22	94.6	1	1	4	1	0	1	0	0	1	0	1	0	1	59	42	40	44	20	0	0	73	0
1	0	0	0	0	0	M	55	27.1	0	107	1	0	0	50	180	80	9.55	211	0.448	132	9.55	12.6	3.89	95	1	1	2	1	0	1	0	0	1	1	1	0	1	60	35	35	52	19	0	0	63	0
1	0	0	0	0	1	M	69	25.51	0	130	7	0	0	106	190	102	10.57	176	0.018	6746	5.61	17.3	3.12	95.2	0	1	1	1	0	1	1	0	1	0	0	0	1	51	35	32	49	19	0	0	86	0
1	0	0	0	0	0	M	51	23.66	0	146	0	0	0	59	120	80	5.89	135	0.248	5	6.79	19.9	5.92	97	1	1	4	1	0	0	0	0	1	0	1	0	1	57	35	35	44	19	0	1	79	0
1	0	0	0	0	0	M	78	23.42	0	127	7	0	0	75	170	80	7.3	134	0.103	2896	5.15	25.1	2.77	97	1	1	4	1	0	1	0	0	1	0	2	0	1	67	36	50	45	18	0	0	89	0
1	0	0	0	0	1	M	80	22.09	0	156	5	0	0	98	168	96	11.77	198	0.03	146	6.07	42.9	2.77	97	0	1	4	1	1	0	0	0	1	1	1	0	1	51	38	37	51	20	0	0	60	1
1	0	0	0	0	0	M	70	24.8	0	137	5	0	0	108	92	60	10.5	252	20	7200	5.09	40.7	3.12	97	1	1	4	2	0	1	0	0	1	1	1	0	1	40	38	35	55	19	0	0	49	0
1	0	0	0	0	0	M	83	25.39	1	140	7	0	0	80	150	95	7.18	302	0.128	12371	4.54	12.7	3.8	97	1	1	4	3	0	1	0	0	1	1	1	0	1	38	37	34	58	19	0	0	49	0
1	0	0	0	0	0	M	69	23.42	0	143	5	0	0	84	118	79	6.15	210	0.075	904	6.86	45	2.77	97.7	1	1	4	1	0	0	0	0	0	1	0	0	1	30	38	39	66	18	0	0	67	0
1	0	0	0	0	0	M	51	27.89	1	156	5	0	0	80	134	76	9	224	0.42	341	6.29	47.8	3.45	98	1	1	4	1	0	0	0	0	1	1	0	0	1	51	30	33	48	16	0	0
1	0	0	0	0	0	M	40	23.42	0	132	5	0	0	87	110	80	4.48	106	0.228	769	10.95	80.5	2.96	98	0	1	4	2	1	1	0	0	1	1	1	0	1	58	35	35	49	19	0	0
1	0	0	0	0	0	M	59	23.42	0	140	7	1	0	76	132	80	11.59	425	0.439	28	7.45	30.6	1.22	98.5	1	1	4	1	1	1	0	0	0	0	1	0	1	51	31	37	45	20	0	1	64	0
1	0	0	0	0	0	M	62	17.77	2	179	5	0	0	55	150	100	19	154	0.724	2587	4.22	82.2	3.25	99	1	1	4	1	0	1	0	0	1	1	1	0	1	46	35	35	42	19	0	0	52	0
1	0	0	0	0	0	M	51	31.22	1	120	7	0	0	40	110	70	5.3	187	0.192	28	5.08	41.6	4	99	1	1	4	1	0	1	0	0	0	0	0	0	1	57	35	35	52	19	0	0	75	0
1	0	0	0	0	1	M	60	24.22	1	131	1	0	0	84	132	79	6.51	204	0.284	341	6.71	7.2	2.52	99.3	0	1	4	2	0	0	0	0	0	0	0	0	1	71	35	35	27	19	0	0	89	0
1	0	0	0	0	0	M	60	25.35	1	142	5	1	0	72	140	90	10.3	176	0.645	227	5.51	43.1	2.77	99.3	0	1	4	1	0	1	0	0	1	0	0	1	1	71	40	37	49	21	0	1	62	1
1	0	0	0	0	0	M	84	25.97	0	69	1	0	0	67	155	70	12.66	169	0.286	681	6.47	14.5	1.08	100	0	1	4	2	1	1	0	0	1	1	1	0	1	34	38	36	53	20	0	0	57	0
1	0	0	0	0	0	M	76	23.42	1	91	5	0	0	84	140	85	5.38	236	1.84	1915	8.74	10.1	0.51	100	1	1	4	4	0	1	0	0	1	1	1	0	1	30	35	35	70	19	0	0	7	1
1	0	0	0	0	0	M	57	23.84	2	98	1	0	0	74	118	61	5.94	164	0.135	2903	5.76	21	3.18	100	1	1	4	1	0	1	1	0	1	1	1	2	0	30	35	35	77	19	0	0	44	0
1	0	0	0	0	0	M	52	27.18	0	138	0	0	0	108	94	58	7.83	174	0.35	368	7.6	44.2	3.64	100.1	1	1	4	2	0	0	0	0	0	0	1	0	1	60	32	36	45	17	0	0	69	0
1	0	0	0	0	0	M	70	23.42	1	139	5	0	0	58	160	90	5.27	153	2.7	273	6.1	72	2.8	100.2	0	1	4	1	0	1	0	0	2	1	0	0	1	43	35	34	51	20	0	0	83	0
1	0	0	0	0	0	M	59	23.88	1	115	5	0	0	70	94	56	4.98	230	0.12	1147	5.66	15	3.2	100.9	1	1	4	1	0	1	0	0	1	0	0	0	1	52	35	35	45	19	0	0	101	0
1	0	0	0	0	1	M	54	23.42	1	138	7	0	0	83	154	96	7.97	195	0.069	1400	8.68	27.6	1.88	101	1	1	4	4	0	1	0	0	1	1	1	0	1	46	35	35	51	19	0	0	44	0
1	0	0	0	0	0	M	64	23.31	1	125	4	0	0	64	130	75	8.4	206	0.022	2587	3.17	21.5	3.35	102	1	1	4	1	0	1	1	0	0	0	0	0	1	55	35	39	42	20	0	0
1	0	0	0	0	0	M	57	27.66	1	140	7	0	0	93	111	74	5.31	121	1.46	37	6.89	19.4	3.4	102	1	1	4	1	1	1	0	0	1	0	0	0	1	62	32	34	43	20	0	0	102	0
1	0	0	0	0	0	M	68	23.42	2	149	5	0	1	106	140	80	11.6	189	5.09	3899	6.23	34.9	1.56	102	0	1	4	2	1	0	0	0	1	0	1	0	1	67	35	35	51	13	0	0	14	1
1	0	0	0	0	0	M	56	24.68	1	118	3	0	0	90	150	70	6.08	273	0.025	4000	7.19	15.1	3.6	103	1	1	4	1	0	1	0	0	0	0	0	0	1	66	32	34	48	19	0	0	46	0
1	0	0	0	0	0	M	74	23.66	0	118	1	0	0	74	127	84	14.96	175	2.05	322	7.85	56.4	1.87	103	1	1	4	2	0	0	0	0	1	0	1	0	1	42	40	40	60	15	0	0	43	1
1	0	0	0	0	0	M	50	24.8	1	137	5	0	0	102	166	117	8.7	211	0.194	641	12.55	18.9	3.16	104	1	1	4	3	0	0	0	0	1	0	1	0	1	38	30	30	48	18	0	0	59	0
1	0	0	0	0	0	M	49	32.63	1	158	5	0	0	65	130	70	7.28	125	0.72	560	6.98	18.1	2.4	104	1	1	4	2	0	0	0	0	1	1	0	0	1	55	35	35	49	19	0	0	85	0
1	0	0	0	0	1	M	69	23.42	0	115	7	1	0	75	120	85	7.47	215	4.4	276	7.98	9.7	1.69	104.9	1	1	4	2	0	1	0	1	1	0	1	0	1	51	36	38	49	20	0	0	1	1
1	0	0	0	0	0	M	57	23.42	1	156	7	0	0	125	80	60	7.31	165	0.134	121	7.42	42.8	3.24	105	1	1	4	2	0	1	0	0	0	1	0	0	0	48	39	33	44	19	0	0	60	0
1	0	0	0	0	0	M	76	21.3	2	129	7	0	0	60	120	70	9.28	250	0.468	453	4.83	13.1	1.42	106	1	1	4	1	0	1	1	0	1	1	1	0	1	59	39	30	46	20	0	0	84	0
1	0	0	0	0	0	M	63	23.42	1	135	5	0	0	87	130	100	7.52	142	0.075	1326	5.85	24.9	4.83	106	1	1	4	1	0	0	0	0	0	0	0	0	1	54	34	34	47	20	0	0
1	0	0	0	0	0	M	44	26.03	0	125	3	0	0	95	125	70	10.47	223	0.922	139	7.9	50.5	2.77	107	1	1	4	1	1	0	0	0	1	1	0	0	1	42	35	38	55	19	0	0	85	0
1	0	0	0	1	0	M	64	20.07	0	111	5	0	1	82	126	90	10.83	301	10	19638	3.93	68.5	1.86	107	0	1	4	2	0	1	0	0	1	1	1	0	1	30	35	34	66	16	0	0	99	0
1	0	0	0	0	0	M	51	23.05	1	152	7	0	0	70	140	92	9.24	160	6.14	14	14.77	59.5	0.07	107.9	1	1	4	1	1	1	0	0	1	0	0	0	1	56	27	36	46	18	0	0	87	0
1	0	0	0	0	0	F	54	29.3	0	124	5	0	0	85	160	90	9.78	190	3.44	5249	8.55	56	1.11	108	1	1	4	2	1	1	0	0	1	1	1	0	1	51	31	36	49	20	0	0	100	0
1	0	0	0	0	0	M	69	23.42	1	124	5	0	0	90	100	72	5.67	111	0.168	1670	4.43	75.3	2	108	1	1	4	4	0	1	1	0	1	0	1	0	1	41	45	53	51	17	0	0	67	0
1	0	0	0	0	0	F	62	23.42	0	146	5	0	1	67	62	42	12.06	187	0.95	1600	6.4	36.6	3.91	109	0	1	2	1	0	1	0	0	3	1	2	0	1	69	49	52	45	20	0	0	49	0
1	0	0	0	0	0	M	55	23.42	1	145	0	1	0	100	90	62	6.47	138	0.09	641	4.93	15	2.97	109	1	1	4	4	0	0	1	0	1	0	1	0	1	58	35	35	46	19	0	0	64	0
1	0	0	0	0	1	M	74	30.12	0	131	5	0	0	78	120	80	6.06	189	0.695	2090	5.37	13.8	1.71	109	1	1	4	2	0	0	0	0	1	1	1	0	1	40	37	36	55	20	0	0	84	0
1	0	0	0	0	0	M	78	18.69	1	148	3	0	0	75	96	60	9.86	171	0.107	5893	6.86	48.7	2.77	109	1	1	4	1	0	1	1	0	1	1	0	0	1	35	35	35	58	19	0	0	60	0
1	0	0	0	0	0	M	75	16.53	1	153	5	1	0	80	120	80	8.97	141	0.997	2587	6.91	28.3	1.94	109.7	0	1	4	1	0	0	0	0	1	2	0	0	1	51	37	36	49	19	0	0	33	1
1	0	0	0	0	0	M	50	25.71	0	133	5	0	0	75	128	90	9.86	202	1.17	32	5.42	20.3	1.03	111	1	1	4	1	0	0	0	0	1	0	1	0	1	65	35	35	46	19	0	0	98	0
1	0	0	0	0	0	F	72	23.42	1	127	2	0	0	40	100	60	19.43	234	0.213	9258	7.73	17.1	1.85	111.1	1	1	4	2	0	1	0	0	1	1	1	0	1	55	32	45	55	31	0	0	67	0
1	0	0	0	0	0	M	65	22.15	1	119	0	0	1	57	140	70	8.04	164	0.003	74	5.28	13.6	1.78	113	1	1	4	1	1	0	0	0	0	1	0	0	1	70	31	37	49	9	0	0	81	0
1	0	0	0	0	0	M	54	24.5	2	157	5	0	0	64	120	75	6.15	183	0.127	610	5.37	26.4	3.52	115	0	1	4	1	0	0	0	0	0	1	1	0	1	55	37	36	45	20	0	0	47	0
1	0	0	0	0	0	M	62	23.42	1	115	5	0	0	55	100	60	4.1	123	0.231	83	4.48	18.1	1.83	115	0	1	4	1	0	1	0	0	0	1	1	0	1	51	35	32	49	21	0	0	64	0
1	0	0	0	0	0	F	82	23.42	0	119	1	0	0	95	125	82	8.49	138	0.018	20000	7.31	24.8	2.19	115	0	1	4	4	0	1	0	0	0	1	0	0	1	40	36	38	54	19	0	0	24	1
1	0	0	0	0	0	M	70	26.12	1	124	5	0	0	65	130	80	8.08	224	0.418	493	6.68	12.2	3.04	115	1	1	4	2	1	0	0	0	0	0	0	0	1	55	36	30	55	16	0	0	59	0
1	0	0	0	0	0	M	63	25.35	1	130	7	0	0	45	80	60	9.96	195	0.198	137	6.22	41.6	3.09	116	1	1	4	1	0	0	0	0	1	0	0	0	1	66	37	33	48	17	0	0	60	0
1	0	0	0	0	0	M	71	27.34	0	148	5	1	0	70	130	70	7.36	123	0.067	1500	4.44	24.3	2.27	117	1	1	4	1	0	1	1	0	0	1	0	0	1	48	25	30	45	16	0	0	47	0
1	0	0	0	0	0	M	72	23.42	2	137	5	0	0	68	150	90	17.33	206	1.03	240	6.07	17.8	3.75	117	1	1	4	1	0	0	1	0	2	0	0	0	1	47	36	26	53	24	0	0	50	0
1	0	0	0	0	0	M	65	22.31	0	137	0	0	0	78	158	96	4.87	171	0.294	601	5.72	18.9	3.39	117.7	1	1	4	1	0	0	0	0	0	1	0	0	0	63	35	35	57	19	0	0	75	0
1	0	0	0	0	0	M	62	22.49	1	134	5	0	0	85	130	80	5.22	114	0.117	1817	6.86	8.9	2.77	118	0	1	4	1	0	0	0	0	1	0	1	0	1	51	35	35	49	19	0	0	57	0
1	0	0	0	0	0	F	75	23.42	0	141	0	1	0	135	90	70	10.25	226	0.297	18486	7.7	14	3.73	119	1	1	4	4	0	0	0	0	0	1	1	0	1	35	35	38	58	18	0	0	35	1
1	0	0	0	0	0	M	77	19.81	1	150	5	0	0	82	168	92	12.28	173	0.26	3771	4.59	26.6	1.7	120	0	1	4	2	0	0	1	0	1	1	1	0	1	56	29	35	48	18	0	0	66	0
1	0	0	0	0	0	F	70	24.03	2	113	5	1	0	95	130	80	9.63	284	0.32	29000	9.36	16.5	3.45	120	0	1	4	3	1	0	0	0	1	1	1	0	1	34	36	33	54	21	0	0	14	1
1	0	0	0	0	0	M	85	30.47	1	127	5	0	0	65	160	80	9.84	163	0.742	962	7.51	32.8	3.11	122	1	1	4	3	0	0	1	0	1	1	1	0	1	47	35	37	60	18	0	0	18	1
1	0	0	0	0	0	M	86	19.37	0	129	7	0	0	70	88	55	5.9	154	7.6	4510	6.76	9.7	1.97	122.2	0	1	4	1	0	1	0	0	0	0	1	0	1	51	35	35	49	19	0	0	87	0
1	0	0	0	0	0	M	77	23.42	1	122	0	0	1	95	100	70	12.77	263	1.71	19551	6.86	18.1	3.5	123.6	0	1	4	3	0	0	1	0	1	1	1	0	1	28	40	35	60	19	0	0	68	0
1	0	0	0	0	0	M	83	18.75	1	120	5	0	1	90	137	70	12.13	183	4.37	741	4.55	31.5	2.87	126	0	1	4	1	0	0	0	0	2	1	1	0	1	65	37	34	44	17	0	0	13	1
1	0	0	0	0	0	M	63	22.04	1	91	5	0	0	20	60	40	5.26	192	1.38	150	4.67	14	2.84	127	1	1	4	1	0	1	0	0	0	0	1	0	1	45	35	35	46	19	0	0	49	0
1	0	0	0	0	0	M	77	23.42	1	98	5	0	0	135	140	100	5.73	173	6.5	3719	15.83	13.4	2.63	127	1	1	4	4	1	0	1	0	0	1	1	0	1	16	35	35	60	19	0	0	86	0
1	0	0	0	0	0	M	65	23.62	0	99	5	0	0	82	150	90	9.1	120	7.6	6504	5.76	41.6	3.62	130	0	1	4	2	0	1	0	0	1	0	1	0	1	36	39	32	49	17	0	0	92	0
1	0	0	0	0	0	M	76	19.49	1	137	3	0	0	65	124	73	7.62	172	0.11	3915	4.73	60.6	2.25	130.2	1	1	4	2	0	0	0	0	1	1	1	0	1	19	33	31	62	20	0	0	70	0
1	0	0	0	0	0	M	56	25.95	0	138	5	0	0	84	146	98	8.9	243	0.125	1662	4.65	13.8	1.84	130.3	1	1	4	1	0	0	0	0	0	0	0	0	0	52	26	36	53	17	0	0	51	1
1	0	0	0	0	0	M	54	27.43	1	122	7	0	0	84	120	80	5.24	218	0.073	4858	11.55	12.6	1.67	131	1	1	4	2	1	1	0	0	1	0	1	0	1	40	34	33	62	17	0	0	56	0
1	0	0	0	0	0	M	70	20.96	0	95	4	0	0	38	110	70	5.97	160	10	372	8.88	60	0.7	132	1	1	4	4	0	1	0	1	2	0	2	0	1	51	42	46	49	19	0	0	84	0
1	0	0	0	0	0	M	71	21.19	1	107	5	0	0	70	160	95	6.68	189	17	169	5.04	56.9	2.79	133	0	1	4	1	0	1	0	0	1	0	2	0	1	51	33	35	49	19	0	0	61	0
1	0	0	0	0	0	M	53	23.42	0	119	1	0	0	95	95	70	12.24	202	0.165	1640	5.3	35.5	2.48	141	0	1	4	4	0	0	0	0	0	1	0	0	1	40	32	30	61	18	0	0	54	0
1	0	0	0	0	0	M	67	23.42	1	133	5	0	1	108	90	70	10.59	174	4.54	880	6.86	54.9	3.78	142	1	1	4	4	0	0	0	1	3	0	3	0	1	50	50	52	45	25	0	0	31	1
1	0	0	0	0	0	M	85	22.72	0	136	7	0	0	55	130	70	7.42	188	0.613	463	15.84	15.5	3.29	143.5	1	1	4	2	1	0	0	0	0	1	0	0	1	65	28	28	46	27	0	0	51	1
1	0	0	0	0	0	M	54	23.42	2	139	5	0	0	88	106	70	6.37	167	0.199	9627	6.53	30.6	1.34	144	0	1	4	1	0	1	0	0	1	0	0	0	1	60	35	35	46	19	0	0	50	0
1	0	0	0	0	0	M	85	23.42	1	95	5	0	0	83	170	90	10.34	218	0.372	5445	5.81	12.3	1.52	144	1	1	1	4	0	1	0	0	1	1	1	0	1	55	35	35	50	19	0	0	1	1
1	0	0	0	0	0	M	79	23.42	0	95	3	0	0	105	105	65	13.27	285	1.46	10037	6.92	8.4	2.82	144	0	1	4	3	0	1	0	0	0	0	2	0	1	55	43	32	55	16	0	0	86	0
1	0	0	0	0	0	F	70	24.97	0	153	2	1	0	83	110	80	7.54	153	1.47	32198	14.54	26.2	0.66	144	0	1	0	3	1	1	0	0	1	1	0	0	1	48	35	36	55	20	0	0	35	1
1	0	0	0	0	1	M	69	25.95	0	135	5	0	0	65	180	90	9.21	160	0.307	295	3.77	26.4	3.75	144.9	1	1	4	1	0	1	0	0	2	1	1	0	1	68	36	32	46	22	0	0	78	1
1	0	0	0	0	0	F	74	22.03	0	108	5	0	0	106	110	60	7.51	298	1.02	35000	29.44	132.4	1.64	145	1	1	4	2	1	0	1	0	1	1	1	0	1	29	31	35	56	16	0	0	1	1
1	0	0	0	0	0	M	86	28.13	0	132	5	0	1	70	130	80	6.47	52	0.5	5399	6.39	49.1	2.24	147	0	1	4	1	0	1	1	0	2	0	3	1	0	30	50	72	59	40	0	0	53	0
1	0	0	0	0	0	M	65	20.03	1	132	5	0	0	70	130	80	6.01	127	0.542	116	3.4	41.6	2.8	154	1	1	4	1	0	1	0	0	0	0	1	0	1	56	40	39	44	19	0	0	76	0
1	0	0	0	0	1	M	80	33.3	1	128	3	0	0	100	120	85	8.13	103	7.15	12000	6.87	50.3	2.65	159	1	1	5	3	0	0	0	0	2	0	2	0	1	28	35	35	55	19	0	0	27	1
1	0	0	0	0	1	M	71	23.42	0	139	0	0	0	68	130	80	9.05	206	0.012	3283	6.34	15.4	1.66	166	1	1	4	2	0	0	0	0	0	1	1	0	1	54	29	37	42	19	0	0	93	0
1	0	0	0	0	0	F	76	23.42	0	134	7	0	0	84	152	72	6.93	202	0.627	30000	8.25	16.6	4.12	166	0	1	4	1	0	1	0	0	1	1	1	0	1	23	38	35	52	17	0	0	1	1
1	0	0	0	0	0	F	75	24.3	0	109	5	1	0	112	140	90	8.87	168	5.05	24579	4.97	25.3	1.82	168	0	1	4	1	0	1	0	0	0	0	2	0	1	27	35	35	68	19	0	1	61	0
1	0	0	0	0	0	M	67	22.93	2	142	0	1	0	50	130	90	9.34	216	0.385	2162	6.72	28.2	2.29	169	1	1	0	2	0	0	0	0	1	1	0	0	0	48	33	31	35	19	0	0	83	0
1	0	0	0	0	0	M	82	21.45	1	113	7	1	0	98	138	86	5.04	223	0.22	9426	5.34	10.9	4.07	171.9	0	1	4	2	0	1	0	0	1	0	1	0	1	51	28	31	49	17	0	1	5	1
1	0	0	0	0	1	M	77	25.07	1	91	0	0	0	108	198	112	6.91	199	0.562	4857	6.01	318.9	3.96	172.4	0	1	4	3	0	1	0	0	1	1	1	0	0	44	35	33	57	16	0	0	5	1
1	0	0	0	0	0	M	71	24.51	0	123	1	0	0	120	90	60	8.63	139	2.45	7100	17	38.1	2.4	185	1	1	4	4	1	1	0	1	1	0	1	0	1	51	35	35	49	19	0	0	1	1
1	0	0	0	0	1	M	67	23.42	0	124	0	0	0	98	211	110	5.11	120	0.024	19000	6.82	10.5	3.67	198	0	1	1	3	1	0	1	0	2	1	1	0	1	41	33	29	55	17	0	0	50	0
1	0	0	0	0	0	F	74	23.42	2	108	2	0	0	58	118	72	5.97	211	0.1	6933	21.98	27.4	1.22	207.8	0	1	2	4	1	1	0	0	1	1	1	0	1	48	35	35	47	19	0	0	80	0
1	0	0	0	0	0	M	66	23.42	0	78	3	0	0	79	170	90	6.83	355	0.153	1937	4.8	5.8	1.52	219	1	1	4	4	0	1	0	1	1	0	0	0	1	45	37	38	48	18	0	0
0	1	1	1	1	0	F	75	25.56	1	128	7	0	0	84	100	60	15.08	151	7.86	4437	10.05	41.6	2.73	61.6	0	1	4	3	1	1	1	0	1	1	1	0	1	39	38	36	58	18	0	0
0	1	1	1	1	0	M	77	21.72	1	146	5	0	0	88	140	70	20.57	183	4.54	2600	5.69	106.8	3.06	96	1	1	4	2	1	1	1	0	1	1	0	0	1	50	40	37	48	19	0	0	44	0
0	1	1	1	0	0	M	83	22.72	0	147	5	0	0	66	146	67	13.24	167	8.2	2078	6	42.1	1.51	115	1	1	4	2	1	1	1	0	1	0	1	0	1	67	43	36	48	20	0	0	68	0
0	0	1	1	0	1	F	62	27.11	0	136	7	1	0	87	135	85	9.44	147	1.85	250	16.34	11.1	4.27	39	1	1	4	2	1	1	0	0	0	0	2	0	1	51	33	20	44	20	0	0	44	0
0	0	1	1	0	1	F	63	24.22	0	97	0	0	0	85	128	78	6.6	84	0.158	1700	11.49	47.8	1.66	47	1	1	4	2	1	0	0	0	1	1	1	0	1	40	35	35	56	19	0	0	45	0
0	0	1	1	1	0	F	72	21.56	0	132	7	0	0	53	130	59	5.52	145	0.167	804	4.83	18.1	1.81	51	1	1	4	1	1	1	0	0	1	1	1	0	1	60	38	35	40	19	0	0	46	0
0	0	1	1	1	0	M	52	23.42	1	143	3	0	0	75	130	75	11.21	236	0.926	749	7.09	33.6	2.74	53	1	1	4	1	0	1	0	0	0	0	1	0	1	60	35	35	46	19	0	0
0	0	1	1	0	0	F	66	21.76	0	109	3	0	0	78	120	78	8.92	173	7.08	1478	7.05	101.4	2.59	53	0	1	4	1	0	1	0	0	1	0	1	0	1	51	31	39	49	19	0	0	64	0
0	0	1	1	1	0	F	42	30.47	0	151	7	0	0	95	180	100	9.17	275	2.06	150	6.49	60.1	3.39	53.3	1	1	4	1	0	1	0	0	0	0	1	0	1	71	34	34	47	20	0	0	66	0
0	0	1	1	0	1	M	68	15.57	0	107	0	0	0	64	90	53	14.34	265	10	2587	6.86	41.6	1.68	54	1	1	4	1	0	0	0	0	0	0	1	0	1	51	28	38	49	18	0	0	15	1
0	0	1	1	1	0	F	77	18.22	0	152	7	0	0	78	121	73	10.81	148	0.545	79.2	5.19	77.1	2.27	54.2	0	1	4	1	0	1	1	0	1	0	1	0	1	61	36	30	40	18	0	0	54	0
0	0	1	1	1	0	F	62	25.81	0	161	5	0	0	65	125	85	11.36	154	2.58	257	6.52	90.3	2.7	55	1	1	4	1	0	0	0	0	1	0	1	0	1	61	36	32	47	51	0	0	61	0
0	0	1	1	0	0	M	59	26.4	1	103	5	0	0	92	150	90	11.61	158	1.65	450	7.86	41.6	2.99	55	1	1	4	1	0	1	0	0	1	0	0	0	1	40	36	35	48	19	0	0	50	0
0	0	1	1	0	0	F	71	22.03	1	113	5	0	0	92	130	90	12.28	116	7.43	3817	17.86	41.6	3.87	55	0	1	4	3	1	1	0	0	1	0	1	0	1	62	30	30	49	18	0	0	12	1
0	0	1	1	0	0	M	60	23.61	1	142	5	0	0	80	110	80	6.88	150	1.37	918	4.81	32.2	2.7	55	1	1	4	1	0	0	0	0	1	0	0	0	1	50	36	34	58	16	0	0	76	0
0	0	1	1	1	0	M	68	17.72	0	116	5	0	0	80	150	70	12.3	121	10	430	9.39	41.6	3.68	56	1	1	4	2	0	1	0	0	1	0	1	0	1	43	36	35	48	17	0	0	52	0
0	0	1	1	1	1	F	73	24.98	1	137	5	0	1	56	139	76	11.38	208	0.141	111	6.6	42.5	2.86	57	1	1	4	1	1	0	0	0	0	1	1	0	1	48	34	35	51	21	0	0	67	0
0	0	1	1	0	1	F	57	21.09	0	136	1	0	1	77	123	72	7.37	199	0.111	50	5.59	51.3	2.91	58	1	1	4	1	0	1	0	0	0	0	1	0	1	70	34	36	42	19	0	0
0	0	1	1	1	1	M	60	29.38	1	145	5	0	0	76	113	66	9.09	194	0.204	2587	4.78	25.2	2.36	58	1	1	4	1	0	0	0	0	0	1	0	0	1	51	30	32	49	17	0	0	55	0
0	0	1	1	0	1	F	54	26.08	1	144	5	0	0	82	119	77	17.59	241	0.023	100	15.23	26.5	4.67	58	1	1	4	2	1	1	0	0	1	1	0	0	1	38	38	35	52	17	0	0	45	0
0	0	1	1	1	0	M	50	22.57	1	141	0	0	0	77	121	77	11.85	241	0.077	366	4.67	16.9	3.39	59	0	1	4	1	0	1	0	0	1	0	1	0	1	65	33	36	40	20	0	0	60	0
0	0	1	1	0	0	F	58	23.42	0	136	7	0	0	78	130	80	16.22	243	0.07	327	9.28	56	1.34	59	1	1	4	1	1	1	0	0	1	1	1	0	1	49	35	35	47	19	0	0	65	0
0	0	1	1	0	0	M	66	21.56	2	140	5	0	0	68	125	60	5.88	213	0.024	257	4.88	80.9	2.42	59.1	0	1	4	2	0	0	0	0	1	0	1	0	1	40	30	33	50	16	0	0	92	0
0	0	1	1	0	0	F	58	19.53	0	135	5	0	0	66	145	90	11.68	177	3.73	1069	6.45	22.5	2.99	59.7	1	1	4	1	0	0	0	0	1	1	1	0	1	51	28	32	42	19	0	0	75	0
0	0	1	1	1	0	M	67	23.24	1	122	5	0	0	57	155	90	8.81	205	0.207	480	4.07	13.3	3.15	60	1	1	4	2	0	0	0	0	1	1	1	0	1	70	29	28	42	16	0	0	62	0
0	0	1	1	1	1	F	68	25.48	0	127	5	0	0	70	130	80	8.97	211	10	1484	6.95	49.8	3.33	60	1	1	4	1	0	1	0	0	1	0	1	1	1	39	40	33	54	18	0	0	89	0
0	0	1	1	0	0	M	73	23.42	1	123	1	0	0	40	105	60	8.86	190	2.89	79	3.39	8	1.8	61	1	1	4	2	0	1	0	0	1	0	1	0	1	62	34	33	41	13	0	0	54	0
0	0	1	1	0	0	M	54	20.55	1	134	4	0	0	93	112	70	6.36	166	0.082	361	14.16	14.7	2.31	61	1	1	4	1	1	0	0	0	1	0	0	0	1	62	37	35	45	20	0	0	61	0
0	0	1	1	1	1	F	67	25.33	0	123	5	0	0	88	150	90	10.3	235	0.083	771	5.17	40.6	2.25	61	1	1	4	1	0	0	0	0	1	0	1	0	1	58	34	30	47	19	0	0	76	0
0	0	1	1	1	0	F	50	25.91	0	143	5	0	0	110	120	70	9.57	299	0.008	1833	4.39	31.2	2.77	61	1	1	4	1	0	1	0	0	0	0	1	0	1	55	35	35	48	19	0	0	61	0
0	0	1	1	0	0	M	59	26.95	1	147	4	0	0	104	127	92	8.39	224	0.041	1128	4.06	29.5	3.44	61	1	1	4	2	0	0	0	0	0	0	1	0	1	52	30	30	50	18	0	0	70	0
0	0	1	1	1	0	F	48	26.04	0	146	7	0	0	72	126	72	8.99	123	0.297	166	5.94	19.5	2.79	61.2	0	1	4	1	0	1	0	0	1	1	1	0	1	60	39	39	46	19	0	0	68	0
0	0	1	1	0	1	M	37	25.71	2	92	5	0	0	75	95	60	9.64	196	10	897	5.38	52.5	2.91	61.9	1	1	4	1	0	1	0	0	1	0	2	0	1	52	34	54	50	33	0	0	77	0
0	0	1	1	1	0	M	47	23.42	0	160	1	0	0	65	130	80	8.61	133	64	2587	4.94	81.4	0.32	62	1	1	4	4	0	1	0	1	2	0	1	0	1	38	40	38	55	17	0	0
0	0	1	1	1	1	F	64	21.51	0	102	4	0	0	60	110	60	7.15	154	0.133	1925	5.99	10.6	1.83	63	1	1	5	4	0	1	0	0	1	0	0	0	1	50	32	32	50	18	0	0	71	0
0	0	1	1	1	1	M	74	27.56	1	121	5	0	0	78	130	72	9.04	190	1.75	1110	4.45	20	1.78	65	1	1	4	2	1	0	1	0	1	0	1	0	1	51	36	38	49	22	0	0	84	0
0	0	1	1	0	1	M	60	21.47	1	117	2	0	0	75	170	120	6.37	158	0.014	12	6.49	11.4	2.73	66	1	1	4	2	1	0	0	0	1	0	1	0	1	48	30	36	53	17	0	0	88	0
0	0	1	1	1	0	M	50	24.02	1	159	1	0	0	45	113	85	6.77	150	0.031	30	5.3	35.3	2.77	70	0	1	4	2	0	0	0	0	1	0	1	0	1	51	36	35	49	19	0	0
0	0	1	1	1	0	M	42	23.42	0	138	5	0	0	65	91	62	11.02	190	1.47	15	6.83	82.4	3.24	71	1	1	4	1	0	0	0	0	2	1	1	0	1	55	36	32	49	17	0	0	66	0
0	0	1	1	0	0	M	44	25.83	0	145	5	0	0	65	155	110	15.75	216	2.84	680	5.75	52.6	2.31	73	1	1	4	2	0	1	0	0	0	1	0	0	1	40	34	36	56	20	0	0	51	0
0	0	1	1	1	0	M	48	24.98	1	159	5	0	0	75	95	58	20.78	197	6.57	2587	5.95	59.9	2.68	75	1	1	4	2	0	1	0	0	2	0	1	0	1	58	35	35	43	19	0	0	53	0
0	0	1	1	1	0	M	76	23.42	0	123	5	1	0	100	120	80	5.31	218	0.355	7869	8.46	33.7	2.49	75	0	1	4	4	1	1	1	0	0	0	1	0	1	51	35	35	49	19	0	1	1	1
0	0	1	1	1	1	F	71	27.59	0	115	5	0	0	90	130	90	16.13	195	10	3330	4.91	76.7	3.15	75	0	1	4	2	0	1	0	0	1	1	1	0	1	33	35	35	59	19	0	0	54	0
0	0	1	1	1	0	M	62	23.42	0	133	5	0	0	72	135	86	16.87	230	14	157	7.19	41.6	2.01	76	0	1	4	3	0	1	0	0	1	1	0	0	1	61	34	34	49	16	0	0	81	0
0	0	1	1	1	1	M	67	24.8	1	132	5	0	1	58	119	70	5.73	235	0.051	100	4.73	43.5	1.94	76	1	1	4	1	0	0	0	0	2	1	2	0	1	50	38	50	53	18	0	0	46	0
0	0	1	1	1	0	M	61	23.42	1	134	5	0	0	87	165	111	12.87	178	3.73	1284	5.14	46.7	3.48	76.7	1	1	4	3	0	0	0	0	0	0	1	0	1	39	27	34	55	16	0	0
0	0	1	1	1	0	M	50	22.72	0	123	5	0	0	76	150	100	7.63	174	10	100	5.75	109.4	3.42	77	0	1	4	1	0	1	0	0	1	1	1	0	1	45	41	35	56	17	0	0	45	0
0	0	1	1	0	1	M	79	24.16	1	115	1	0	0	74	150	90	10.8	187	64	185	12.04	62.5	1.54	78	1	1	4	3	1	1	0	0	1	0	1	0	1	41	34	30	55	18	0	0	63	0
0	0	1	1	1	1	F	79	23.42	0	138	1	0	0	60	140	80	11.79	155	0.36	307	5.53	19.4	3.08	79	1	1	4	1	0	0	0	0	1	0	0	0	1	51	40	35	42	19	0	0	69	0
0	0	1	1	0	1	M	62	27.14	1	135	0	0	0	88	128	76	10.38	218	33	2587	6.15	41.6	2.77	79.6	1	1	4	3	0	0	0	1	1	0	1	0	1	29	33	35	52	19	0	0	1	1
0	0	1	1	0	1	M	69	23.42	0	136	6	0	0	59	114	83	7.93	156	0.012	817	4.71	13.2	2.36	80	1	1	4	1	0	1	0	0	1	1	1	0	0	60	32	35	50	18	0	0	54	0
0	0	1	1	0	0	F	63	25.63	2	114	1	0	0	78	140	80	7.67	238	0.214	5533	4.18	14.3	4.94	81	1	1	4	4	0	0	0	0	1	1	0	0	1	38	33	30	50	17	0	1	55	0
0	0	1	1	1	0	M	76	23.42	1	102	5	0	0	71	130	80	4.71	183	0.056	2587	6.86	44.2	5.19	82	1	1	4	1	0	0	0	0	0	0	0	0	1	46	35	35	52	19	0	0
0	0	1	1	0	0	M	52	27.76	1	133	0	0	0	66	140	90	11	268	0.524	1586	6.86	87.6	2.89	83	0	1	4	1	0	1	0	0	1	1	1	1	1	55	35	43	52	20	0	0	52	0
0	0	1	1	1	0	M	70	23.42	1	151	5	0	0	102	170	100	17.05	133	2.41	2587	6.86	33.9	2.43	84.6	1	1	4	2	0	1	0	0	1	1	1	0	1	60	29	36	42	18	0	0
0	0	1	1	1	0	M	75	19.82	0	126	5	0	0	54	130	70	6.56	352	0.434	2587	4.25	21.6	1.55	85.3	1	1	4	1	0	0	0	0	1	1	1	0	1	71	42	32	47	20	0	0	89	0
0	0	1	1	1	0	M	67	22.04	1	140	5	0	0	86	138	86	9.37	128	1.83	204	5.89	79.7	2.7	86	1	1	4	1	0	0	0	0	0	1	0	0	1	58	33	30	50	18	0	0	81	0
0	0	1	1	1	0	M	76	20.57	0	132	5	0	0	70	150	80	13.8	424	0.156	356	4.98	41.6	4.15	87	0	1	4	1	0	0	0	0	1	1	1	0	0	51	29	35	49	20	0	0	66	0
0	0	1	1	1	1	F	78	22.89	0	154	5	0	0	98	100	80	15.19	288	0.165	15080	4.28	104.2	1.06	89	1	1	4	2	0	1	0	0	1	0	0	0	1	52	35	35	54	19	0	0	75	0
0	0	1	1	0	0	M	79	20.2	0	141	1	1	0	65	125	80	3.03	87	1.31	1846	4.88	19.5	2.89	89.3	1	1	4	2	0	0	1	0	1	1	1	0	1	50	37	35	47	19	0	0	41	1
0	0	1	1	0	1	M	52	23.42	1	118	5	0	0	100	127	80	10.41	314	0.183	2587	6.86	9.5	2.77	91	1	1	4	4	0	1	0	1	1	0	1	0	1	44	35	35	26	19	0	0	68	0
0	0	1	1	0	0	M	77	20.76	2	124	5	0	0	92	131	80	13.58	341	2.07	1639	7.16	23.6	2.43	91	1	1	4	1	0	0	0	0	1	1	1	0	1	61	34	33	43	16	0	0	16	1
0	0	1	1	0	1	M	61	18.42	0	130	1	0	0	120	120	80	9.96	195	4.9	9469	6.72	41.6	1.48	93.6	0	1	4	2	1	1	1	0	1	1	0	0	1	48	25	32	54	17	0	0	80	0
0	0	1	1	1	1	M	60	22.04	0	150	4	0	0	96	120	80	10.35	227	6.36	188	11.5	41.6	1.59	94.7	1	1	4	1	1	1	0	0	1	0	0	0	1	51	35	35	49	19	0	0	90	0
0	0	1	1	0	0	F	77	26.71	0	110	5	0	0	70	185	100	6.01	173	1.14	1143	5.85	41.3	2.13	96	0	1	4	2	1	0	0	0	1	1	1	0	1	50	35	35	45	19	0	0	60	0
0	0	1	1	0	1	M	68	22.04	1	116	0	0	0	66	153	86	5.99	226	2.38	1498	6.23	16.1	2.9	98	1	1	4	2	0	1	0	0	0	1	1	0	1	40	35	35	55	19	0	0	67	0
0	0	1	1	1	1	M	66	22.49	1	109	1	0	0	75	125	77	9.12	137	0.429	44	4.67	24.8	2	99	1	1	4	2	0	1	0	1	1	0	1	0	1	65	35	34	49	18	0	0	59	0
0	0	1	1	1	1	M	67	23.42	1	121	5	0	0	75	180	90	6.85	250	21	96	6.58	32.9	1.98	100.6	0	1	4	2	0	0	0	0	1	0	0	0	1	67	35	28	51	20	0	0	76	0
0	0	1	1	0	0	M	64	20.9	1	146	5	0	0	60	130	90	10.83	147	0.378	173	4.81	39	3.42	101	1	1	4	1	0	0	0	0	1	0	1	0	1	61	31	36	47	19	0	0	103	0
0	0	1	1	0	0	F	62	23.42	0	141	0	0	0	90	100	60	14.18	197	5.42	3600	8.74	40.9	1.6	103	1	1	4	2	1	1	1	0	1	1	1	0	1	40	35	35	52	19	0	0	50	0
0	0	1	1	1	1	F	76	24.09	0	117	1	0	0	70	130	70	5.4	287	7.8	367	4.91	32.5	1.64	104	0	1	4	1	0	0	0	0	0	1	2	0	1	66	35	35	46	19	0	0	63	0
0	0	1	1	1	1	M	71	23.42	1	113	1	0	0	90	120	80	11.3	124	10	713	7.34	78.7	2.33	107	0	1	4	2	0	1	0	0	1	0	1	0	1	53	40	37	48	19	0	0	89	0
0	0	1	1	1	0	M	75	23.51	1	113	5	0	0	98	107	75	5.93	242	4.57	285	4.29	14	2.71	111	1	1	4	2	0	0	0	0	0	1	1	0	1	42	40	30	47	14	0	0	63	0
0	0	1	1	0	0	M	61	20.2	0	127	5	0	0	60	140	90	8.91	238	0.902	150	4.35	22.4	4.71	117	1	1	4	1	0	0	0	0	1	1	1	1	1	51	36	36	42	17	0	0	49	0
0	0	1	1	0	1	F	70	24.44	0	158	5	0	0	68	150	80	3.86	199	0.014	5300	6.45	36.1	3.54	125	1	1	4	1	0	0	0	0	1	1	0	0	1	63	27	32	47	14	0	0	55	0
0	0	1	1	1	0	M	58	26.64	1	99	5	0	0	75	120	67	8.75	211	1.11	55	7.51	19.9	4.71	127	1	1	4	1	1	0	0	0	2	1	3	0	1	47	42	40	45	17	0	0	58	0
0	0	1	1	1	0	M	66	23.42	1	130	5	0	0	80	202	120	11.97	184	30	5700	6.02	56.9	2.54	142	1	1	4	2	0	0	0	0	1	0	1	0	1	29	37	41	64	18	0	0	50	0
0	0	1	1	0	0	M	84	22.31	1	123	5	0	0	110	107	64	12.29	206	0.118	6248	13.23	55.5	2.71	190	0	1	4	3	0	1	1	0	0	1	0	0	1	29	45	37	63	18	0	0	3	1
0	0	1	0	0	0	M	73	26.93	0	110	0	0	0	78	170	100	9.74	211	23	1876	4.75	26.2	3.82	54	1	1	4	3	0	0	0	0	1	0	1	0	1	46	36	36	53	20	0	0
0	0	1	0	0	0	M	61	27.38	0	101	5	0	0	88	140	90	10.29	147	1.99	230	5.79	15.8	3.53	58	1	1	4	2	0	0	1	0	1	1	1	0	1	52	35	35	42	19	0	0	44	0
0	0	1	0	0	0	M	72	27.55	1	127	7	0	0	76	100	80	5.12	130	0.014	2755	6.86	13	1.92	76.7	1	1	4	2	0	1	0	0	1	1	1	0	1	60	35	35	48	19	0	0	77	0
0	0	1	0	0	0	M	73	22.59	1	133	5	0	0	88	130	80	5.2	147	0.539	4900	6.37	23	4.23	87	0	1	4	2	0	0	0	0	1	0	1	0	0	50	38	32	50	32	0	1
0	0	1	0	0	0	M	59	19.61	0	124	7	0	0	96	96	79	6.36	169	2.7	3000	15.6	13.4	2.35	98	0	1	5	2	0	1	1	0	1	0	1	0	1	26	35	35	55	19	0	0	44	0
0	1	0	1	0	0	M	76	23.42	1	126	5	0	0	67	145	90	6.42	138	0.095	1249	3.66	18.4	2.39	56	1	1	4	2	1	1	1	0	1	1	1	0	1	55	35	35	51	19	0	0	45	0
0	1	0	1	1	0	F	63	23.42	0	131	5	0	0	52	156	80	5.17	89	0.904	471	17.08	24.1	4.46	82	0	1	4	1	1	1	1	0	1	0	1	1	1	57	35	41	46	16	0	0	53	0
0	1	0	1	1	1	F	76	25.33	0	141	5	0	0	70	140	80	11.44	195	4.04	2587	6.86	60	2.77	82.3	1	1	5	1	1	1	1	0	0	0	1	0	1	55	37	30	48	21	0	0	100	0
0	1	0	1	0	1	M	76	23.42	0	112	5	0	0	90	148	93	7.01	140	0.019	2237	11.19	21.2	2.21	101	1	1	4	1	1	1	1	0	1	1	1	0	1	34	35	35	55	19	0	0	50	1
0	1	0	1	0	0	M	83	23.8	1	108	1	0	0	75	135	70	10.08	165	1.43	3946	5.1	19.1	1.98	108	1	1	7	2	1	1	1	1	2	0	1	0	1	42	35	35	50	19	0	0	38	1
0	1	0	1	1	0	M	71	23.88	1	159	7	0	0	92	115	70	8.54	320	0.423	244	14.55	62.8	1.31	125	1	1	4	2	1	1	1	0	1	0	0	0	1	45	36	33	48	17	0	0	48	0
0	1	0	0	0	0	F	80	25.71	1	133	5	0	0	77	155	70	7.02	118	0.021	176	8.16	9.7	1.77	75	0	1	4	2	1	1	1	0	2	0	1	0	1	41	35	35	55	19	0	0	70	0
0	0	0	1	1	1	F	67	23.14	0	157	0	0	0	47	110	70	25.92	301	10	717	6.02	143.3	3.53	34	1	1	4	1	0	0	0	0	1	1	1	0	1	58	31	36	42	20	0	0	68	0
0	0	0	1	1	0	F	57	21.02	0	152	1	0	0	66	130	80	11.19	169	0.723	720	21.74	31.5	2.57	36.3	1	1	4	2	0	0	0	0	0	0	0	0	1	39	32	34	47	18	0	0	45	0
0	0	0	1	0	1	F	51	24.77	0	133	4	0	0	84	140	80	9.52	180	10	100	12.54	31.8	3.96	39	0	1	4	2	1	1	0	0	0	1	1	0	1	50	42	38	48	17	0	0	47	0
0	0	0	1	0	0	M	66	19.38	2	119	0	0	0	85	124	88	10.42	168	0.275	199.9	6.7	46.9	3.26	43	1	1	4	2	0	0	0	0	1	0	2	0	1	48	31	40	49	21	0	0	52	0
0	0	0	1	0	0	F	62	27.34	0	109	0	0	0	85	140	40	3.98	77	0.016	1517	4.53	31.3	4.27	46.3	0	1	0	1	0	0	0	0	2	0	2	0	1	50	33	30	49	19	0	0	99	0
0	0	0	1	0	0	F	52	23.05	0	123	5	0	0	68	120	80	12.25	159	1.1	184	5.64	61.1	4.03	47.7	0	1	4	1	0	1	0	0	1	0	1	0	1	51	37	35	49	18	0	0	67	0
0	0	0	1	0	0	F	50	27.56	0	128	0	0	0	60	138	80	6.31	198	0.118	580	6.41	23.5	3.59	48	1	1	4	1	0	0	0	0	0	1	1	0	1	50	35	35	47	19	0	0	44	0
0	0	0	1	1	0	M	79	21.3	1	165	5	0	0	78	105	70	16.47	322	5.46	71	8.21	86.1	2.75	52.2	1	1	4	1	1	0	0	0	1	1	0	0	1	51	36	32	49	17	0	0	81	0
0	0	0	1	0	0	F	52	23.42	0	113	5	0	0	90	165	90	6.91	168	0.139	2176	5.33	20.7	2	52.4	0	1	4	1	0	0	0	0	2	0	1	0	1	51	44	39	49	19	0	0	89	0
0	0	0	1	1	0	F	80	23.42	0	141	4	0	0	65	170	80	6.19	172	0.436	1291	4.1	35.4	3.44	53	1	1	4	1	0	0	0	0	0	1	0	0	1	55	36	37	40	20	0	0	40	1
0	0	0	1	1	1	F	50	23.42	1	91	5	0	0	80	120	72	7.41	234	0.056	479	7.78	49.3	1.8	53	0	1	4	2	0	0	0	0	2	0	1	0	1	55	59	65	42	22	0	0	89	0
0	0	0	1	1	0	M	65	24.61	1	135	7	1	0	75	190	110	7.6	162	0.287	71	5.48	41.6	3.66	53	1	1	4	1	0	1	0	0	1	1	1	0	1	55	42	39	44	20	0	0	90	0
0	0	0	1	1	0	M	69	25.71	1	119	7	0	0	80	110	80	7.98	131	10	1336	6.54	41.6	2.57	53	1	1	4	2	0	1	0	0	1	0	1	0	1	60	41	35	46	19	0	0	84	0
0	0	0	1	0	0	M	53	24.91	1	126	1	1	0	76	120	80	14.9	278	9.54	2718	5.32	31.9	3.14	53	1	1	4	1	0	1	0	0	1	0	1	0	1	55	38	38	46	21	0	0	80	0
0	0	0	1	1	0	M	75	24.24	1	150	5	0	0	75	110	70	13.56	185	9.5	120	7	83.7	3.37	53	1	1	4	2	0	0	0	0	1	1	0	0	1	36	36	37	47	18	0	0	66	0
0	0	0	1	0	1	F	68	25.24	1	184	7	0	0	70	130	70	7.58	166	1.03	146	6.35	161.4	3.38	53	1	1	4	3	0	1	0	0	1	0	0	0	1	38	31	31	47	20	0	0	1	1
0	0	0	1	0	0	F	72	20.68	0	155	5	0	0	95	150	100	15.79	274	0.837	556	12.75	10.8	2.72	53	1	1	4	2	0	1	0	0	0	0	0	0	1	68	34	32	48	20	0	0	87	0
0	0	0	1	0	0	F	60	26.71	0	116	5	0	0	100	138	85	8.42	127	3.91	940	13.8	23.3	3.13	53	1	1	4	2	1	1	0	0	1	0	1	0	1	51	35	38	49	18	0	0	73	0
0	0	0	1	0	0	F	63	23.42	0	144	7	0	0	90	100	70	8.64	199	64	1030	6.04	68.2	1.97	53	1	1	4	4	0	0	0	1	1	0	0	0	1	51	31	33	49	20	0	0	1	1
0	0	0	1	1	1	F	80	19.15	1	139	5	0	0	50	90	70	15.77	217	0.114	2587	4.45	85	2.54	53	0	1	4	1	0	1	0	0	0	2	0	0	1	55	31	37	49	36	0	0	21	1
0	0	0	1	0	0	M	73	27.34	1	108	0	0	0	60	142	85	9.21	189	1.68	3031	6.86	11.9	2.77	53	0	1	4	2	0	1	0	0	2	1	1	0	1	51	37	35	49	17	0	0	61	0
0	0	0	1	0	0	M	55	22.49	1	137	1	1	0	80	110	60	12.64	256	9.29	2129	6.59	41.6	2.29	53	1	1	4	2	1	1	0	0	1	0	1	0	1	49	36	38	52	16	0	0	77	0
0	0	0	1	1	0	F	60	23.42	0	98	5	0	0	80	120	60	5.55	156	9.5	137	11.75	18.3	2.85	53	0	1	4	2	0	0	0	0	1	1	1	0	1	48	28	35	53	18	0	0	92	0
0	0	0	1	1	0	F	69	18.37	0	130	5	0	0	104	140	110	13.29	189	0.361	3748	4.62	48	3.31	53	1	1	4	1	0	0	0	0	0	0	2	1	1	22	31	35	57	18	0	0	59	0
0	0	0	1	1	0	F	71	23.42	0	130	7	1	0	99	148	90	11.19	115	0.672	2795	18.45	19.5	3.68	53	1	1	4	2	0	1	0	0	1	1	1	0	1	32	34	32	58	16	0	0	55	0
0	0	0	1	0	1	M	47	34.61	2	160	3	0	1	76	160	110	8.86	148	10	100	8.11	41.6	3.52	53.3	1	1	4	1	0	0	0	0	1	0	1	0	1	45	35	35	57	19	0	0	49	0
0	0	0	1	1	0	M	71	23.42	1	141	5	1	0	76	182	106	16.83	207	7.55	33	4.69	48.2	3.93	53.4	0	1	4	1	0	0	0	0	1	1	1	0	0	56	35	33	43	17	0	0	65	0
0	0	0	1	1	0	M	57	19.1	1	149	5	1	0	55	90	60	10.75	176	2.33	170	5.09	60	3.29	53.4	1	1	4	1	0	1	0	0	0	0	1	0	1	50	29	37	52	18	0	0	91	0
0	0	0	1	0	1	F	71	17.9	0	124	5	0	0	94	96	63	13.99	255	51	11720	2.97	48.2	2.78	53.6	1	1	4	3	0	1	0	0	1	0	1	0	1	48	31	32	50	17	0	0	73	1
0	0	0	1	0	1	F	52	20.2	0	142	1	0	0	70	140	80	16.59	183	0.013	2149	12.07	39.4	1.98	53.7	1	1	4	1	0	0	0	0	1	0	1	0	1	55	35	35	42	19	0	0	84	0
0	0	0	1	1	0	F	67	21.46	0	153	5	0	0	60	136	70	8.26	230	1.23	15000	8.84	42.9	3.35	54	1	1	4	1	0	0	0	0	1	1	1	0	1	35	37	34	42	20	0	0	47	0
0	0	0	1	1	0	M	44	23.42	1	133	0	0	0	80	180	110	9.61	165	2.12	140	5.77	41.6	1.77	54	1	1	4	1	0	0	0	0	1	0	1	0	1	55	37	45	48	20	0	0	48	0
0	0	0	1	1	0	F	62	19.72	0	117	5	0	1	65	118	70	7.87	112	4.84	381	5.38	15.9	3.35	54	0	1	4	1	0	1	0	0	1	0	2	0	1	51	37	40	49	25	0	0	88	0
0	0	0	1	1	1	F	76	21.88	0	110	1	0	0	83	158	70	10.61	167	44	8137	4.7	55.7	3.01	54	0	1	4	1	0	0	0	0	1	0	1	0	1	51	34	36	49	19	0	0	65	0
0	0	0	1	0	0	F	67	22.48	1	72	5	0	0	88	146	80	11.82	183	48	100	6.75	72.4	2.82	54	0	1	0	2	0	0	0	0	0	0	1	0	1	43	30	38	52	17	0	0	49	0
0	0	0	1	0	1	M	63	22.68	0	163	5	0	0	66	104	70	12.78	213	6.98	217	9.92	31.1	2.64	54	0	1	4	1	0	0	0	0	1	0	0	0	0	60	35	36	54	16	0	0	89	0
0	0	0	1	1	1	M	57	20.58	1	124	5	0	0	89	149	100	6.54	162	8.76	1495	5.38	48.6	2.01	54.3	1	1	4	1	0	0	0	0	1	1	1	0	1	54	35	34	49	18	0	0	95	0
0	0	0	1	0	0	F	65	23.61	0	147	5	0	0	75	130	75	16.29	174	10	112	5.17	100.5	4.19	55	1	1	4	1	0	1	0	0	2	0	1	0	1	43	44	33	41	18	0	0	70	0
0	0	0	1	1	0	M	62	25.39	0	117	2	1	0	80	120	72	7.52	193	0.571	42	6.66	14.2	2.44	55	1	1	1	1	1	1	0	0	0	1	0	0	1	62	35	35	42	19	0	0	64	0
0	0	0	1	0	1	F	78	23.42	0	138	0	0	0	65	121	69	9.61	221	14	3748	5.15	30.2	2.42	55	0	1	4	1	0	1	0	0	0	0	0	0	1	45	40	35	42	18	0	0	61	0
0	0	0	1	1	0	F	75	23.42	0	125	5	0	0	58	140	86	5.54	85	0.604	109	5.85	49.7	2.05	55	1	1	4	2	0	1	0	0	0	0	1	0	0	45	40	35	43	20	0	0	78	0
0	0	0	1	1	0	M	58	19.05	1	121	5	0	0	108	75	50	8.19	187	0.144	114	9.35	4	2.27	55	1	1	4	4	1	0	0	0	1	0	2	0	1	28	27	38	46	19	0	0	91	0
0	0	0	1	1	1	F	62	22.66	0	150	7	1	0	102	160	90	13.25	214	7.17	123	5.59	105.8	2.88	55	1	1	4	1	0	1	0	0	1	0	1	0	1	70	30	35	47	20	0	0	76	0
0	0	0	1	1	0	F	66	20.41	0	117	5	1	1	80	120	75	15.92	245	9.48	940	4.97	34	4.34	55	1	1	4	3	0	1	0	0	2	1	0	0	1	39	35	35	47	19	0	0	23	1
0	0	0	1	0	0	F	75	23.46	0	138	2	0	0	80	135	83	6.69	93	0.012	2587	7.59	17.9	3.61	55	1	1	0	1	0	1	0	0	1	0	1	0	1	50	35	37	47	17	0	0	48	1
0	0	0	1	0	0	M	63	23.42	0	119	5	0	1	77	155	70	9.36	132	5.35	5	6.86	65.7	3.73	55	1	1	4	1	0	0	0	0	1	1	2	0	1	50	29	55	48	25	0	0
0	0	0	1	1	1	M	63	16.8	1	143	5	0	0	80	120	80	12.68	291	0.264	4269	4.91	41.6	2.35	55	1	1	4	1	0	0	0	0	1	0	1	0	0	48	30	36	48	19	0	0	91	0
0	0	0	1	1	0	M	78	25.01	0	160	5	0	0	66	170	100	24.04	287	1.59	84	4.94	172.2	3.4	55	1	1	4	1	0	0	0	0	1	1	1	0	1	48	42	33	49	18	0	0	69	0
0	0	0	1	1	1	F	59	22.89	0	152	5	0	0	83	140	80	16.25	151	1.2	2229	3.55	43	2.37	55	0	1	4	1	0	0	0	1	0	1	1	0	1	51	25	35	49	18	0	0	80	0
0	0	0	1	0	1	F	72	17.86	0	157	4	0	0	62	105	65	7.15	240	64	2644	5.43	49	2.16	55	1	1	4	3	0	1	0	0	1	1	0	0	1	45	40	33	49	16	0	0	60	1
0	0	0	1	0	1	M	72	26.06	2	145	5	1	0	62	124	70	16.57	306	10	103	6.26	75.1	4.31	55	1	1	4	1	0	0	0	0	0	0	0	0	0	58	27	36	50	16	0	1
0	0	0	1	0	1	F	70	23.52	0	173	5	0	0	75	140	80	9.19	207	0.019	2596	6.33	99.2	2.37	55	1	1	4	2	0	1	0	0	2	0	1	0	0	51	35	332	52	17	0	0	63	0
0	0	0	1	0	1	F	67	23.42	1	132	5	1	0	98	134	90	13	189	0.013	572	6.86	26.4	2.3	55.8	0	1	4	1	0	1	0	0	0	1	0	0	0	61	34	30	49	14	0	0
0	0	0	1	0	1	F	53	21.78	0	49	5	0	0	78	150	90	8.31	161	1.43	128	4.54	59.1	2.27	56	0	1	2	1	0	1	0	0	1	0	1	0	1	63	35	38	41	19	0	0	80	0
0	0	0	1	0	0	F	74	20.13	0	97	0	0	0	70	129	70	6.16	156	0.976	343	9.36	24.5	2.2	56	1	1	4	2	0	1	0	0	2	0	1	0	1	56	51	37	41	19	0	0	57	0
0	0	0	1	0	1	F	55	23.42	0	129	5	0	0	65	120	75	13.32	353	0.065	650	9.51	28.2	5.25	56	1	1	4	2	1	1	0	0	0	0	0	0	1	47	29	32	44	18	0	0	78	0
0	0	0	1	0	0	M	67	23.42	0	114	5	0	0	88	120	60	4.49	171	0.007	765	5.1	41.6	3.01	56	1	1	4	1	0	1	0	0	1	0	1	0	1	51	36	36	44	20	0	0
0	0	0	1	1	0	M	71	28.13	1	158	5	0	0	65	150	75	9.08	218	0.66	132	4.01	16.3	2.18	56	1	1	4	1	0	1	0	1	0	1	0	0	1	56	31	30	46	17	0	0	63	0
0	0	0	1	0	0	M	33	23.42	1	154	1	0	0	55	104	70	15.9	323	0.513	100	7.67	26.1	3.14	56	1	1	4	1	0	1	0	0	0	0	0	0	0	55	35	38	47	20	0	0	51	0
0	0	0	1	1	0	F	53	24.22	1	134	5	0	0	74	157	105	5.84	195	0.322	333	10.58	41.6	4.51	56	1	1	4	1	0	0	0	0	1	0	1	0	1	41	35	35	47	19	0	0	67	0
0	0	0	1	1	0	F	50	23.42	0	126	3	0	0	90	150	100	4.83	147	0.211	1832	17.9	23.8	2.63	56	1	1	4	1	0	1	0	0	1	0	1	0	1	68	35	35	48	19	0	0	64	0
0	0	0	1	0	1	F	46	23.42	0	152	5	0	0	100	125	75	9.26	146	0.031	3720	4.81	34.5	2.2	56	1	1	4	1	0	1	0	0	1	0	0	0	1	46	34	36	49	18	0	0
0	0	0	1	1	0	M	60	22.31	1	103	5	0	0	90	140	90	6.85	233	2.27	104.6	5.64	16.2	2.53	56	1	1	4	1	0	1	0	0	1	0	2	0	1	54	40	35	51	20	0	0	72	0
0	0	0	1	0	0	M	43	28.37	1	169	5	0	0	95	120	90	12.8	206	0.421	9	5.85	45	4.31	56.2	1	1	4	1	0	0	0	0	1	0	0	0	1	48	37	33	48	20	0	0	68	0
0	0	0	1	0	0	M	55	22.15	2	109	5	0	0	90	117	67	8.31	154	27.8	1922	7.39	27.8	2.32	56.9	0	1	4	1	0	0	1	0	1	1	1	0	1	54	38	36	61	18	0	0	90	0
0	0	0	1	1	0	F	57	17.48	0	124	3	0	0	70	107	75	6.92	153	0.422	340	6.05	33.5	3.56	57	1	1	4	1	0	1	0	0	1	1	1	0	1	34	31	28	40	17	0	0	48	0
0	0	0	1	0	0	F	79	21.69	0	128	5	0	0	78	145	80	9.12	211	0.107	1225	6.05	83.5	6.05	57	1	1	4	1	0	1	0	0	1	1	1	0	0	55	29	31	43	20	0	0	54	0
0	0	0	1	1	1	F	82	19.91	1	134	5	0	0	75	140	70	10.31	152	64	302	5.5	32.1	4.33	57	1	1	4	2	0	0	0	0	1	1	1	0	1	59	37	35	44	20	0	0	74	0
0	0	0	1	0	0	F	48	22.22	0	112	5	0	0	72	116	85	6.46	140	0.517	136	4.58	13.8	1.64	57	1	1	4	1	0	1	0	0	1	0	1	0	1	60	30	37	46	17	0	0	64	0
0	0	0	1	1	1	M	65	22.66	0	154	5	0	0	119	158	97	13.14	210	31	2587	6	104.6	3.37	57	0	1	4	2	0	0	0	0	1	0	1	0	1	50	30	33	49	18	0	0	19	1
0	0	0	1	0	1	F	74	25.48	0	128	3	0	0	80	110	60	8.01	171	2.23	3282	7.97	39	2.64	57	0	1	4	1	1	0	0	0	1	1	1	0	1	45	30	36	53	18	0	0	47	0
0	0	0	1	0	0	F	60	23.42	0	93	5	0	0	80	120	70	8.3	197	0.052	28	6.63	26.4	3.53	57	1	1	4	2	0	1	0	0	2	1	2	0	1	40	43	47	55	20	0	0	54	0
0	0	0	1	0	1	M	70	26.17	1	110	0	0	0	70	100	70	7.92	150	2.36	5886	3.85	41.6	2.29	57	0	1	4	2	0	1	0	0	0	1	1	0	1	23	31	36	78	18	0	0	1	1
0	0	0	1	0	0	F	63	21.64	0	124	6	0	0	115	138	97	5.04	137	0.354	8131	16.2	11.2	2.72	57.6	0	1	4	2	1	1	0	0	2	0	1	0	1	44	38	34	55	16	0	0	76	0
0	0	0	1	0	0	F	72	23.42	1	122	1	0	0	78	110	70	5.79	197	0.118	475	8.26	14.5	3.98	58	1	1	4	1	1	1	0	0	0	0	1	0	1	64	42	32	44	17	0	0
0	0	0	1	0	0	F	64	24.24	0	128	5	0	0	86	140	90	10.4	61	4.31	85	5.62	41.6	3.63	58	1	1	2	1	0	0	0	0	1	1	3	0	1	73	32	46	45	28	0	0	78	0
0	0	0	1	1	0	F	70	23.42	0	132	5	0	0	58	120	80	10.22	162	3.02	92	18.6	57.3	1.25	58	1	1	4	2	1	0	1	0	1	0	1	0	1	58	36	34	45	20	0	0	59	0
0	0	0	1	0	1	M	65	23.42	1	142	0	0	0	85	160	104	7.11	134	0.28	1167	5.02	44	2.45	58	1	1	4	1	0	0	0	0	1	0	1	0	1	49	37	39	45	20	0	0	60	0
0	0	0	1	0	1	F	59	22.03	2	123	1	0	0	70	130	80	7.52	167	0.027	1523	6.15	28.4	2.85	58	0	1	4	1	0	1	0	0	1	0	1	0	1	70	37	38	46	20	0	0	45	0
0	0	0	1	1	1	M	50	17.78	1	148	5	0	0	80	150	85	13.02	291	5.49	2281	4.63	65.2	1.33	58	1	1	4	1	0	1	0	0	1	0	1	0	1	51	35	35	49	19	0	0	72	0
0	0	0	1	0	1	M	45	26.99	1	135	5	1	0	76	170	90	9.84	196	2.24	2587	4.24	41.6	3.03	58	1	1	4	1	0	0	0	0	1	0	1	0	1	71	31	34	49	16	0	1	84	0
0	0	0	1	1	0	F	85	23.42	0	129	5	0	0	66	130	70	7.68	207	2.31	120	6.24	13.4	3.3	58	0	1	4	1	0	0	0	0	1	1	1	0	1	30	38	33	50	16	0	0	45	0
0	0	0	1	1	0	M	61	23.42	0	162	7	0	0	95	110	70	11.38	121	1.4	1471	6.79	85.1	3.85	58	0	1	4	3	0	1	0	0	1	1	0	0	1	45	36	37	50	20	0	0	7	1
0	0	0	1	1	0	M	63	24.77	1	150	5	0	0	76	104	70	11.72	227	4.7	425	6.23	15.04	2.13	58	0	1	5	2	0	0	0	0	1	1	1	0	1	40	27	30	51	19	0	0	64	0
0	0	0	1	0	1	F	75	23.42	0	145	7	0	0	74	110	75	14.94	241	0.53	3900	5.14	47.5	3.7	58	1	1	5	2	0	1	0	0	1	1	0	0	1	35	30	34	60	21	0	0	49	0
0	0	0	1	0	1	F	64	23.97	0	145	0	0	0	98	125	70	8.98	212	0.019	2484	11.87	26.4	1.36	58	1	1	4	1	1	1	0	0	1	1	1	0	0	40	36	33	61	19	0	0	61	1
0	0	0	1	1	0	M	52	21.45	1	123	5	0	0	80	120	70	10.92	304	0.262	587	12.36	15.9	2.15	58.1	1	1	4	1	0	1	0	0	1	0	1	0	0	59	30	35	41	20	0	0	79	0
0	0	0	1	0	0	M	44	25.86	1	140	1	0	0	86	170	120	13.18	260	1.12	206	4.19	68.6	2.65	58.2	0	1	4	1	0	1	0	0	1	1	0	0	1	61	35	35	49	19	0	0	91	0
0	0	0	1	1	0	F	52	24.74	0	142	5	0	0	80	138	91	11.73	234	1.44	370	5.5	45.4	4.54	59	1	1	4	1	0	0	0	0	0	1	0	0	1	55	35	35	32	19	0	0	53	0
0	0	0	1	1	0	F	54	27.56	0	104	3	0	0	62	130	85	7.3	199	0.079	180	5.47	16.7	2.3	59	0	1	4	1	0	1	0	0	0	0	1	0	1	64	40	35	43	16	0	0	46	0
0	0	0	1	1	1	M	53	23.32	1	154	3	0	0	80	140	80	15.08	171	0.591	192	4.31	18.7	2.97	59	0	1	4	2	0	0	1	0	0	0	0	0	1	43	30	35	44	16	0	0	60	0
0	0	0	1	1	0	M	81	23.42	1	129	5	0	0	80	150	100	9.04	174	1.44	2587	6.93	16.4	3.32	59	0	1	4	2	0	1	0	0	1	1	0	0	0	44	35	35	46	19	0	0	2	1
0	0	0	1	1	1	M	57	26.99	1	116	5	0	0	58	85	55	9.16	216	0.076	90	7.27	18.6	3.04	59	1	1	4	1	1	1	1	0	0	0	0	0	1	61	35	35	50	19	0	0	87	0
0	0	0	1	0	0	M	73	23.42	0	121	1	0	0	110	128	70	8.14	138	0.579	100	16.77	86.9	2.77	59	1	1	4	1	0	1	1	0	1	0	1	0	1	45	35	35	50	19	0	0	44	0
0	0	0	1	1	0	M	63	21.72	1	135	5	0	0	87	121	78	6.25	196	0.126	2587	6.92	13.4	3.44	59	0	1	4	2	0	1	0	0	1	1	1	0	1	24	32	40	55	19	0	0
0	0	0	1	0	0	M	58	23.42	1	111	5	0	0	64	175	115	9.72	296	4.9	358	5.07	43.2	3.02	59.4	0	1	4	2	0	1	0	0	1	1	1	0	1	36	43	36	62	20	0	0
0	0	0	1	1	0	F	78	23.42	0	121	5	0	0	100	120	72	5.56	171	2.27	2587	6.86	7.9	2.77	59.5	1	1	4	4	1	0	0	0	0	1	1	0	1	26	32	34	58	17	0	0	1	1
0	0	0	1	1	1	F	69	23.42	0	128	5	0	0	60	134	62	7.21	171	2.77	2467	5.29	41.6	3.21	59.7	1	1	4	1	1	1	0	0	1	0	1	0	1	58	36	34	41	19	0	0	9	1
0	0	0	1	0	0	F	71	23.42	0	124	3	0	0	75	112	80	8.1	149	0.042	687	5.66	28.7	3.26	59.8	1	1	4	1	0	0	0	0	2	1	0	0	1	39	37	30	40	18	0	0	68	0
0	0	0	1	0	0	F	60	20.09	0	137	1	1	0	70	140	90	12.52	183	3.02	944	4.25	51.1	2.07	60	1	1	4	1	0	1	1	0	2	0	1	0	1	72	42	37	26	19	0	0	67	0
0	0	0	1	0	0	F	48	23.73	0	125	5	0	0	80	125	75	12.55	266	2.99	138	6.06	13.5	2.72	60	1	1	4	1	0	1	0	0	1	0	1	0	1	65	41	38	42	20	0	1	69	0
0	0	0	1	1	1	M	70	23.5	0	115	5	0	0	93	131	89	10.17	209	0.273	916	5.75	65.1	4.42	60	1	1	4	2	0	0	0	0	1	0	1	0	1	45	40	32	44	19	0	0	63	0
0	0	0	1	0	1	F	70	21.64	0	130	5	0	0	85	140	80	19.22	279	0.022	1877	5.69	43.2	1.68	60	1	1	4	1	0	1	0	0	1	0	1	0	1	68	33	35	46	19	0	0	62	0
0	0	0	1	0	0	M	40	30.12	2	108	1	0	0	70	160	110	8.07	79	3.81	407	4.43	16.4	3.43	60	1	1	4	2	0	1	0	0	1	0	1	0	1	54	40	37	47	17	0	0	59	0
0	0	0	1	1	1	M	62	23.42	0	145	5	0	0	70	140	86	18.76	225	10	390	4.74	64.5	2.77	60	1	1	4	1	0	0	0	0	1	0	0	0	1	51	35	35	49	19	0	0	73	0
0	0	0	1	1	0	M	35	26.57	0	138	5	0	0	92	120	80	10.27	182	52	2228	10.34	150.4	3.76	60.5	1	1	4	1	1	0	0	0	1	0	1	0	1	49	34	40	44	20	0	0	70	0
0	0	0	1	1	1	F	67	20.81	1	117	1	0	0	76	160	105	11.29	251	0.604	391	7.38	15.3	2.8	60.5	1	1	4	2	0	0	0	0	1	1	1	0	1	45	35	35	48	18	0	0	84	0
0	0	0	1	0	1	M	47	23.18	1	151	5	0	0	80	165	80	17.87	316	0.505	636	5.03	49.2	3.34	60.6	1	1	4	1	0	1	0	0	0	0	0	0	0	52	35	35	49	19	0	0	69	0
0	0	0	1	1	0	M	81	24.8	1	137	5	0	0	76	104	68	12.81	270	1.38	100	4.99	58.6	2.81	61	0	1	4	2	0	0	0	0	0	1	2	0	1	69	34	35	44	16	0	0	21	1
0	0	0	1	1	0	M	42	24.45	1	135	5	0	0	80	130	85	11.82	181	2.83	51	5.65	90.7	2.67	61	0	1	4	1	0	0	0	0	0	0	1	0	1	55	35	35	45	19	0	0	50	0
0	0	0	1	0	1	F	72	23.42	0	132	5	0	0	70	115	65	12.44	194	5.59	463	4.31	41.6	3.14	61	1	1	4	2	0	0	0	0	1	1	1	0	1	44	30	33	45	17	0	0	55	0
0	0	0	1	0	0	F	73	23.42	0	139	5	0	0	98	110	70	10.72	159	2.16	572	6.88	49	2.13	61	1	1	4	1	0	1	0	0	1	1	0	0	1	66	35	35	45	19	0	0	54	0
0	0	0	1	1	0	F	80	23.42	0	124	7	1	0	90	145	77	6.9	190	0.039	2587	4	18.5	3.86	61	1	1	4	1	0	1	0	0	1	1	1	0	1	49	39	37	45	19	0	0	72	0
0	0	0	1	0	1	F	48	22.03	1	102	0	0	1	110	135	100	8	189	0.018	790	6.29	45.4	2.91	61	1	1	4	2	0	0	0	0	1	0	1	0	0	39	36	47	47	19	0	0	49	0
0	0	0	1	0	1	F	57	25.72	0	99	3	0	0	60	167	100	7.72	183	0.018	360	12.58	18.3	3.28	61	1	1	4	1	1	1	0	0	1	1	1	0	1	47	35	42	48	22	0	0	50	0
0	0	0	1	0	0	M	65	23.62	1	106	5	0	0	68	136	80	7.9	122	2.67	192	4.84	3.11	2.51	61	1	1	4	2	0	0	0	0	2	1	1	0	1	43	35	35	49	19	0	0	68	0
0	0	0	1	1	0	M	43	23.53	1	133	5	0	0	72	116	78	7.59	235	0.191	310	5.08	34.8	2.43	61	1	1	4	1	0	0	0	0	1	0	1	0	1	51	36	33	49	20	0	0	53	0
0	0	0	1	1	1	M	59	23.42	1	153	5	0	0	70	157	80	11.66	194	0.141	315	5.79	47.1	2.79	61	1	1	4	1	0	1	0	0	1	0	1	0	1	52	30	30	50	17	0	0	58	0
0	0	0	1	0	0	M	52	23.66	1	119	5	0	0	75	130	80	9.56	197	0.751	2587	7.09	38.5	3.5	61	1	1	4	1	0	0	0	0	1	0	1	0	1	44	35	35	50	19	0	0	55	0
0	0	0	1	0	0	M	48	25.86	1	132	7	0	0	60	161	111	10.22	261	0.526	586	6.91	24.4	2.52	61	1	1	4	1	0	1	0	0	0	0	0	0	0	46	33	38	52	18	0	0	45	0
0	0	0	1	1	0	M	54	30.49	1	117	7	0	0	98	170	80	9.3	236	33	597	16.25	29.7	4.83	61	0	1	4	2	1	1	0	0	1	0	1	0	1	48	31	32	55	18	0	0	22	1
0	0	0	1	0	0	M	51	23.42	1	105	5	1	0	84	189	97	12.79	148	10	2600	6.31	65.3	3.41	61	1	1	4	2	0	1	0	0	1	0	1	0	1	37	28	31	55	18	0	0
0	0	0	1	1	1	F	76	24.09	0	150	5	1	0	74	145	100	19.39	277	0.085	172	6.99	110	3.94	61.7	1	1	4	2	0	0	1	0	1	1	0	0	1	60	35	32	44	17	0	0	89	0
0	0	0	1	0	1	F	62	20.45	0	143	5	0	0	54	120	74	9.25	241	2.27	288	5.41	27.5	1.89	61.9	0	1	4	1	0	0	0	0	1	0	1	0	0	58	36	36	49	17	0	0	86	0
0	0	0	1	0	1	F	66	23.42	0	143	5	0	0	80	110	60	13.65	204	0.037	4100	5.46	32.4	4.72	62	1	1	4	1	0	1	1	0	1	0	0	0	1	40	35	34	42	17	0	0	47	0
0	0	0	1	0	0	M	50	20.83	0	140	5	0	0	86	138	96	4.82	212	1.25	170	5.2	19.9	3.96	62	0	1	4	1	0	1	0	0	1	0	1	1	1	40	41	39	43	18	0	0	46	0
0	0	0	1	1	0	M	50	21.3	0	134	7	0	0	56	135	75	8.34	257	0.785	5	6.2	21.6	3.13	62	1	1	4	1	0	1	0	0	1	0	0	0	1	78	35	35	44	19	0	0	77	0
0	0	0	1	1	1	M	51	25.78	0	144	5	0	0	76	130	70	14.98	130	10	2886	4.84	75.4	3.73	62	1	1	4	2	0	0	0	0	1	0	1	0	1	54	35	35	46	19	0	0	54	0
0	0	0	1	0	0	M	68	27.94	1	116	1	0	0	72	150	90	10.8	181	0.872	100	6.12	18.5	3.52	62	0	1	4	1	1	1	0	0	1	0	1	0	1	51	39	37	49	17	0	0	54	0
0	0	0	1	0	0	F	66	24.24	2	151	2	0	0	76	88	65	13.08	235	0.131	2046	5.86	13.1	4.32	62.3	1	1	4	2	1	0	0	0	1	1	1	0	1	31	35	35	59	19	0	0	52	1
0	0	0	1	1	1	M	71	23.12	1	137	5	0	0	70	140	80	16.1	171	10	490	6.23	41.6	2.26	62.8	1	1	4	2	0	1	0	0	1	0	1	0	1	51	36	29	49	20	0	0	91	0
0	0	0	1	1	0	F	76	18.77	0	139	5	0	0	70	160	80	11.83	173	2.66	230	6.09	28.8	2.97	63	1	1	4	1	0	0	0	0	0	1	1	0	1	45	30	35	44	15	0	0	45	0
0	0	0	1	0	1	F	46	20.83	0	129	0	0	0	113	120	80	10.59	173	2.21	1696	5.47	17.7	0.97	63	1	1	4	1	0	0	0	0	1	0	0	0	1	69	35	36	44	16	0	0	77	0
0	0	0	1	1	0	F	67	20.96	0	135	5	0	0	68	158	75	10.42	248	0.235	2587	5.24	11.3	3.53	63	0	1	4	1	0	1	0	0	0	0	0	0	1	49	37	37	45	21	0	0	71	0
0	0	0	1	1	0	F	66	21.23	0	112	0	0	1	80	180	110	7.79	135	3.03	6800	6.44	24.3	3.55	63	1	1	4	1	0	0	0	0	1	0	1	0	1	48	35	35	45	19	0	0	49	0
0	0	0	1	1	0	M	62	24.8	0	130	5	0	1	55	135	80	8.69	96	3.62	28	7.95	24.2	3.72	63	0	1	4	2	0	0	0	0	2	0	3	0	1	58	35	35	46	19	0	0	89	0
0	0	0	1	1	0	M	63	27.34	1	98	3	0	0	65	138	88	11.37	249	10	190	3.97	93	2.37	63	1	1	4	1	0	0	0	0	1	0	1	0	1	55	33	33	46	20	0	0	48	0
0	0	0	1	0	0	M	64	26.35	1	108	0	0	0	70	120	70	7.51	147	1.59	59	13.33	30.7	3.64	63	1	1	4	1	0	0	0	0	1	1	1	0	1	60	35	35	48	19	0	0	40	1
0	0	0	1	1	1	M	52	30.07	1	155	5	0	0	80	125	85	9.72	156	0.057	569	8.03	71.9	4.22	63	1	1	4	1	1	0	0	0	1	1	1	0	1	55	32	35	48	17	0	0	66	0
0	0	0	1	0	1	M	60	19.13	0	146	5	0	0	66	120	80	7.62	193	0.199	1400	6.12	33.5	1.99	63	1	1	4	1	0	1	0	0	0	1	0	0	1	49	31	30	49	17	0	0	51	0
0	0	0	1	0	0	F	75	23.42	0	132	5	0	0	74	109	66	20.04	242	22	2368	4.71	35.4	3.39	63	0	1	4	2	0	0	1	0	0	0	1	0	1	51	32	38	49	18	0	0	58	0
0	0	0	1	1	1	F	87	23.51	1	135	5	1	0	85	140	90	11.03	132	6.35	3545	5.83	93.6	2.74	63	1	1	5	2	0	0	0	0	1	0	1	0	1	51	37	32	49	20	0	0	56	0
0	0	0	1	0	1	M	64	24.98	1	153	1	0	0	86	130	80	12.48	120	0.017	27	3.03	44.9	3.55	63	1	1	4	1	0	0	0	0	1	0	0	0	1	44	29	32	53	19	0	0	61	0
0	0	0	1	0	0	M	63	21.79	1	143	6	0	0	75	149	75	7.91	177	0.022	3773	6.21	41.6	2.92	63	1	1	4	1	0	1	0	0	0	1	1	0	1	39	35	35	55	19	0	0	55	0
0	0	0	1	0	0	M	70	23.42	1	120	1	0	0	76	136	70	9.77	149	0.306	698	5.55	40.5	1.52	63.1	0	1	4	1	0	1	0	0	0	1	2	0	1	41	31	31	65	18	0	0
0	0	0	1	1	1	M	71	26.57	1	130	5	0	0	65	120	70	7.79	82	4.98	1180	6.57	16.9	3.21	63.6	0	1	4	2	0	0	0	0	1	0	1	0	1	41	42	35	55	16	0	0	89	0
0	0	0	1	1	0	M	44	23.91	1	123	5	0	0	80	105	80	5.77	210	0.577	16	4.8	23.1	3.44	63.7	0	1	4	1	0	0	0	0	1	0	1	0	1	59	36	35	45	19	0	0	68	0
0	0	0	1	0	0	F	61	16.36	0	142	1	0	0	100	170	90	15.1	296	3.15	6687	8.19	49.5	0.89	63.8	0	1	4	1	0	0	0	0	2	0	1	0	1	32	30	33	58	17	0	0	89	0
0	0	0	1	0	0	F	66	24.97	1	109	0	1	0	68	180	90	7.11	122	9.55	220	5.49	41.6	2.28	64	0	1	4	1	0	0	0	0	1	1	1	0	1	63	40	39	40	17	0	0	70	0
0	0	0	1	1	0	F	65	23.42	0	145	5	0	0	98	110	60	8.28	215	0.57	3373	6.1	21.2	2.07	64	1	1	4	1	1	0	0	0	0	1	0	0	1	49	31	30	41	20	0	0	64	0
0	0	0	1	1	0	M	53	18.17	1	145	5	0	0	84	144	94	6.63	153	0.047	477	8.8	37.1	1.79	64	0	1	4	1	0	1	0	0	0	0	1	0	1	73	32	35	42	17	0	0	58	0
0	0	0	1	1	0	F	73	22.67	0	130	3	0	0	85	190	88	12.7	133	6.07	701	4.2	44.8	3.4	64	0	1	4	1	0	1	1	0	1	1	1	0	0	68	39	38	43	20	0	0	16	1
0	0	0	1	1	0	M	61	24.62	1	133	5	0	0	117	138	83	9.57	189	0.834	46	7.76	22.9	2.59	64	1	1	4	1	1	0	0	0	1	0	0	0	0	67	30	31	44	18	0	0	58	0
0	0	0	1	0	1	M	36	32.11	1	129	5	0	0	88	145	75	7.74	190	3.74	31	6.5	41.6	7.42	64	1	1	4	1	0	1	0	0	1	1	1	0	0	64	35	35	45	21	0	0	92	0
0	0	0	1	0	0	M	54	23.42	1	153	1	0	0	78	110	70	17.37	301	2.36	100	5.21	82.4	3.73	64	1	1	4	1	0	0	0	0	1	1	0	0	1	49	38	32	48	20	0	0	50	0
0	0	0	1	1	0	M	48	22.03	1	145	5	0	0	80	105	60	8.36	215	3	2587	21.43	42	3.11	64	0	1	4	1	0	0	0	0	1	1	0	0	1	44	34	35	48	20	0	0	55	0
0	0	0	1	1	1	M	41	22.46	1	137	5	0	0	90	100	65	13.25	184	0.147	4122	4.45	15.1	1.45	64	1	1	4	2	0	0	0	0	1	0	1	0	1	46	33	29	48	17	0	0	54	0
0	0	0	1	1	1	F	62	20.24	0	165	5	0	0	72	204	120	15.18	148	0.064	3600	10.19	137.9	3.35	64	0	1	4	1	1	0	0	0	1	1	1	0	1	50	33	34	50	16	0	0	46	0
0	0	0	1	0	0	M	41	24	2	146	5	0	0	80	140	70	9.69	72	0.809	11	4.9	25.3	1.58	64	1	1	4	1	0	1	0	0	1	1	1	0	1	56	33	36	51	17	0	0	91	0
0	0	0	1	1	0	M	69	25.16	1	127	0	0	0	76	130	70	9.89	146	0.689	311	5.64	98.9	2.99	64.1	1	1	4	1	0	1	0	0	1	0	1	0	1	51	40	35	49	19	0	0	76	0
0	0	0	1	1	0	M	53	26.35	1	123	7	0	0	81	140	80	4.45	145	3.56	636	4.55	28.3	2.36	64.1	1	1	4	2	0	1	0	0	1	0	1	0	1	66	35	38	49	19	0	0	72	0
0	0	0	1	1	0	M	51	24.22	1	118	5	0	0	100	120	90	12.58	270	0.071	1032	5.27	9.4	1.93	64.9	0	1	4	2	0	1	0	0	1	1	1	0	1	51	31	33	49	19	0	0	84	0
0	0	0	1	0	0	F	50	21.64	0	110	1	0	0	75	120	70	6.83	126	0.356	1198	3.93	50	7.55	65	0	1	4	1	0	1	0	0	1	0	0	0	1	66	35	35	42	19	0	0	70	0
0	0	0	1	1	1	M	83	23.42	0	139	0	0	1	108	110	68	8.56	191	4.9	720	6.64	23.8	3.16	65	0	1	4	3	0	1	0	0	1	1	1	0	1	32	35	35	48	19	0	0	49	0
0	0	0	1	0	0	F	51	21.64	1	172	5	0	0	89	134	87	8.84	181	0.518	2251	6.31	35.3	1.27	65	1	1	4	1	0	0	0	0	0	0	0	0	1	51	32	36	49	19	0	0
0	0	0	1	1	0	M	46	27.99	1	130	5	0	0	103	115	70	6.93	155	8.6	794	4.76	42	2.42	65	1	1	4	1	0	0	0	0	1	0	2	0	1	52	35	36	50	18	0	0	61	0
0	0	0	1	0	1	M	51	21.61	0	119	0	0	0	79	144	96	10.74	211	4.47	1533	4.57	19.9	1.77	65	0	1	4	1	0	0	0	0	1	0	1	0	1	57	25	24	50	13	0	0	62	0
0	0	0	1	1	1	M	72	23.42	0	127	7	0	0	72	119	72	11.06	237	12	251	7.29	19.9	3.84	65	0	1	4	1	0	0	0	0	0	0	1	0	1	48	35	38	51	18	0	0	63	0
0	0	0	1	0	0	M	52	22.49	1	115	5	0	0	60	110	80	7.21	150	2.37	2587	3.87	41.6	3.24	65	1	1	4	4	0	0	0	0	1	1	1	0	1	64	28	34	51	17	0	0	62	0
0	0	0	1	1	0	M	56	23.42	1	123	7	0	0	86	170	110	10.97	185	0.033	2587	6.86	14.1	2.77	65	1	1	4	1	0	1	0	0	0	0	0	0	1	46	36	35	53	16	0	0	67	0
0	0	0	1	0	0	M	53	23.42	1	137	5	0	0	88	124	76	10.39	125	0.478	631	5.2	26.8	2.18	65	1	1	4	2	1	1	0	0	0	0	0	0	1	43	27	35	55	17	0	0	55	0
0	0	0	1	0	1	M	65	22.77	1	143	0	0	0	70	123	78	11.24	287	0.038	3618	3.89	62.5	1.44	65	1	1	4	1	0	1	0	0	0	1	0	0	1	40	35	35	56	19	0	0	25	1
0	0	0	1	0	1	F	83	17.78	0	124	5	1	1	90	140	80	7.04	312	4.9	5592	4.1	5.8	2.2	65	0	1	4	2	0	0	0	0	1	1	0	0	1	29	35	35	60	19	0	1	66	0
0	0	0	1	1	1	M	41	19.92	1	118	5	0	0	64	120	80	8.81	190	8.84	23	7.41	41.6	2.17	66	1	1	4	1	0	1	0	0	0	0	0	0	1	65	34	34	27	20	0	0	65	0
0	0	0	1	0	0	M	63	23.42	1	102	2	0	0	57	127	82	6.32	175	1.43	1160	4.9	70.6	2.53	66	0	1	4	2	0	0	0	0	1	0	1	0	1	44	37	32	42	19	0	0	72	0
0	0	0	1	0	0	F	74	28.13	0	109	5	0	0	78	120	80	8.38	133	8.74	2734	7.12	25.2	2.66	66	1	1	4	1	0	0	0	0	1	1	1	0	1	56	35	39	44	21	0	0	48	0
0	0	0	1	1	0	M	77	21.79	1	143	5	0	0	127	95	70	17.5	189	2.2	1839	4.52	33.6	3.6	66	1	1	4	3	0	1	0	0	2	1	1	0	1	56	35	37	45	19	0	0
0	0	0	1	0	1	M	49	26.89	1	128	1	0	0	78	140	70	8.23	228	8.37	8	4.7	33.5	2.9	66	1	1	4	1	0	1	0	0	1	0	1	0	1	68	37	31	46	20	0	0	68	0
0	0	0	1	1	0	M	64	23.42	1	115	5	0	0	100	140	80	8.73	199	4.03	2587	7.61	18.4	3.03	66	1	1	4	1	0	0	0	0	1	0	1	0	1	48	32	27	47	18	0	0	55	0
0	0	0	1	1	0	M	69	23.44	1	167	5	0	0	80	126	80	11.33	185	2.82	2765	7.52	35.2	2.94	66	1	1	4	1	0	0	0	0	1	1	1	0	0	39	31	37	47	18	0	0	48	0
0	0	0	1	0	0	M	52	23.42	1	120	5	0	0	62	168	100	8.3	134	0.342	2900	5.84	25.2	3.48	66	0	1	4	2	0	1	0	0	0	0	2	1	1	49	39	40	48	22	0	0	46	0
0	0	0	1	1	1	M	73	27.64	0	128	1	0	0	93	160	101	8.88	166	0.052	160	6.2	35.6	2.43	66	1	1	4	1	1	0	0	0	1	1	0	0	1	51	35	30	49	20	0	0	44	0
0	0	0	1	1	1	F	50	23.01	0	147	5	0	0	62	150	80	6.4	214	2.54	191	4.98	41.6	3.64	66	0	1	4	1	0	0	0	0	1	0	1	0	1	66	29	32	49	19	0	0	93	0
0	0	0	1	0	0	F	60	25.28	0	109	0	0	0	84	120	70	12.46	122	3.91	290	5.92	6.9	2.77	66	1	1	4	2	0	1	0	0	1	0	3	0	1	51	36	44	49	26	0	0	88	0
0	0	0	1	0	1	F	66	18.55	0	150	7	0	0	85	130	70	8.52	85	0.01	2587	7.23	120.4	4.23	66	0	1	4	1	1	1	0	0	2	2	0	0	1	50	36	33	49	16	0	0	89	0
0	0	0	1	0	0	M	38	23.42	1	127	5	0	0	96	118	85	9.56	160	1.68	2495	4.06	41.6	2.2	66	1	1	4	1	0	0	0	0	1	1	1	0	1	51	30	33	58	18	0	0	68	0
0	0	0	1	1	0	F	69	23.42	0	126	5	0	0	93	170	90	19.16	432	10	14000	7.43	31.1	1.27	66	0	1	4	3	1	1	0	0	1	1	1	0	1	30	35	35	60	19	0	0	46	0
0	0	0	1	1	0	F	63	24.44	0	120	5	0	0	102	196	84	6.55	173	1.1	169	6.45	29.4	3.15	66.3	1	1	4	2	1	0	0	0	1	0	0	0	1	71	41	36	46	15	0	0	69	0
0	0	0	1	0	1	M	75	22.83	1	136	1	0	0	62	145	85	9.52	155	29	126	5.67	20.7	2.86	66.3	1	1	4	2	0	0	0	0	1	1	1	0	1	45	34	32	55	18	0	0	67	0
0	0	0	1	1	0	M	45	23.42	1	151	5	0	0	60	94	68	15.81	149	8.04	50	5.05	54.1	4.05	66.6	1	1	4	1	0	1	0	0	1	0	2	0	1	52	41	39	50	17	0	0	90	0
0	0	0	1	1	0	F	53	26.37	2	148	5	0	0	56	174	117	9.12	247	2.63	100	8.36	17.9	3.02	67	1	1	4	1	0	0	0	0	0	1	0	0	0	48	33	35	43	19	0	0	44	0
0	0	0	1	1	0	M	53	25.6	1	148	5	0	0	50	116	67	12.65	200	10	601	3.85	123.2	2.64	67	0	1	4	1	0	0	0	0	1	0	1	0	1	52	35	35	45	20	0	0	71	0
0	0	0	1	1	0	M	52	27.18	1	126	5	0	0	76	155	80	8.83	198	3.59	376	5.61	21.3	3.54	67	0	1	4	1	0	1	0	0	1	0	0	0	1	64	35	35	47	19	0	0	46	0
0	0	0	1	0	0	M	45	24.28	1	133	4	0	0	76	140	90	8.46	195	0.518	308	6.45	22.4	3	67	1	1	4	2	0	1	0	0	1	0	1	0	1	70	32	32	48	19	0	0	69	0
0	0	0	1	0	0	M	71	23.42	1	140	5	0	0	85	165	90	14.66	333	3.97	1415	5.54	55.5	2.4	67	0	1	4	2	0	1	1	0	1	0	1	0	1	46	34	34	48	17	0	0	54	0
0	0	0	1	0	1	M	64	24.22	0	147	5	1	0	92	120	80	8.59	227	3.85	631	6.15	71	1.29	67	1	1	4	1	0	1	0	0	1	1	1	0	1	51	27	36	49	18	0	0	86	0
0	0	0	1	0	0	M	60	22.23	1	128	1	0	0	61	100	62	11.71	150	0.22	1194	5.91	34.4	3.53	67	1	1	4	1	0	1	0	0	1	0	1	0	1	51	35	35	49	19	0	0	58	0
0	0	0	1	0	0	M	47	20.57	0	160	5	0	0	59	120	85	15.62	217	1.76	591	6.29	61	3.66	67	1	1	4	1	0	0	0	0	1	0	0	0	1	52	35	31	50	19	0	0
0	0	0	1	1	1	M	61	23.44	1	138	7	0	0	100	132	75	8.12	166	6.46	1170	4.27	14.7	2.36	67	1	1	4	2	0	1	0	0	1	0	1	0	1	28	38	30	50	18	0	0	62	0
0	0	0	1	1	0	F	61	23.63	0	94	3	0	0	75	160	120	7.69	239	1.14	1789	13.06	15.9	3.64	67	1	1	4	1	0	0	0	0	2	0	1	0	1	38	39	36	50	20	0	0	73	0
0	0	0	1	0	0	M	80	22.02	1	133	0	0	0	64	177	68	10.37	132	3.12	1254	5.08	55.9	2.15	67	1	1	4	1	0	0	1	0	1	0	2	0	1	55	36	36	51	19	0	0	47	0
0	0	0	1	0	0	M	59	25.71	0	139	1	0	0	67	158	70	5.51	240	0.055	43	4.78	36	3.35	67	1	1	4	1	0	1	0	0	1	0	0	0	1	62	37	35	52	19	0	1
0	0	0	1	1	0	M	66	26.17	1	119	1	0	0	90	130	80	9.7	195	7.51	100	5.96	39.6	3.45	67	1	1	4	1	0	1	0	0	1	1	1	0	1	45	30	32	53	19	0	0	47	0
0	0	0	1	0	1	M	69	23.42	1	127	0	0	0	67	109	62	8.03	106	0.128	276	5.41	7.7	1.6	67.3	1	1	4	1	0	1	0	0	1	0	1	0	1	60	29	30	50	16	0	0	65	0
0	0	0	1	1	0	M	62	26.03	1	134	1	0	0	99	190	100	9.89	228	6.74	258	7.08	41.6	2.53	67.5	1	1	4	2	0	1	0	0	1	0	1	0	1	52	35	35	42	19	0	0	91	0
0	0	0	1	0	0	M	77	22.72	1	137	7	0	0	75	135	75	6.32	116	4.75	1134	7.31	22.2	1.73	67.7	1	1	4	1	0	1	0	0	1	0	1	0	1	54	35	30	52	19	0	0	82	1
0	0	0	1	1	0	F	74	28.15	0	122	5	0	0	104	160	100	10.94	243	9.4	7347	7.21	33.4	3.41	67.8	0	1	4	2	0	0	0	0	1	1	0	0	1	42	31	31	52	18	0	0	85	0
0	0	0	1	0	1	M	62	20.7	0	154	5	0	0	95	162	115	15.91	236	0.133	2587	7.78	28	2.78	68	1	1	4	1	0	0	0	0	1	0	1	0	1	52	32	36	45	16	0	0	46	1
0	0	0	1	1	1	F	61	22.21	0	149	5	0	0	58	110	70	11.3	205	0.836	57	5.76	44.5	1.89	68	1	1	4	1	0	0	0	0	1	0	0	0	1	56	35	35	47	19	0	0	57	0
0	0	0	1	0	1	M	61	28.55	1	110	5	0	0	80	120	70	13.79	285	3.2	871	4.35	41.6	3.09	68	0	1	4	1	0	1	0	0	1	0	1	0	1	75	36	25	47	15	0	0	49	0
0	0	0	1	1	1	F	75	23.42	0	141	5	0	0	65	150	90	12.01	221	4.2	2587	11.05	57.1	1.64	68	1	1	4	1	1	1	0	0	0	0	0	0	1	53	39	40	47	48	0	0	58	0
0	0	0	1	0	0	M	41	22.2	1	115	0	0	0	70	120	88	6.23	162	1.07	37	5.31	20.9	2.84	68	1	1	4	1	0	0	0	0	2	0	0	0	1	47	31	35	48	18	0	0	60	0
0	0	0	1	0	0	F	66	20.81	0	134	0	0	1	52	98	60	11.35	137	1.88	224	7.01	44.7	3.1	68	1	1	4	2	0	0	0	0	1	0	1	0	1	44	31	37	48	21	0	0	55	0
0	0	0	1	1	1	M	52	23.44	1	141	5	0	0	80	130	92	8.65	96	10	367	5.93	41.4	2.62	68	1	1	4	1	0	1	0	0	0	0	0	0	1	54	36	36	48	19	0	0	64	0
0	0	0	1	1	1	F	62	21.64	0	155	5	0	0	78	110	70	12.11	151	0.209	2587	4.86	97.1	2.54	68	1	1	4	1	0	0	0	0	1	1	0	0	1	57	40	35	49	20	0	0	94	0
0	0	0	1	1	1	M	48	24.22	0	127	1	0	0	88	170	120	6.05	181	0.024	117	6.44	17.8	4.37	68	1	1	4	2	0	1	0	0	1	0	1	0	1	51	27	33	50	19	0	0	71	0
0	0	0	1	0	1	M	48	26.99	0	146	0	0	0	113	124	72	12.08	250	0.053	1700	6.7	27.4	4.23	68	1	1	4	1	0	1	0	0	1	0	1	0	1	40	36	31	51	19	0	0	46	0
0	0	0	1	1	0	M	59	23.74	1	117	5	0	0	75	98	60	13.11	239	18	2627	4.82	34.5	3.83	68.1	1	1	5	1	0	0	0	0	2	1	2	0	1	12	42	38	88	20	0	0	81	0
0	0	0	1	1	0	F	68	23.83	0	133	5	0	0	100	160	90	10.38	221	0.727	88	6.74	51.8	1.55	68.4	1	1	4	1	1	0	0	0	1	1	1	0	1	64	33	29	45	17	0	0	85	0
0	0	0	1	0	0	M	66	25.28	1	111	1	1	0	80	120	70	14.35	190	3.06	1735	5.1	71	2.93	68.6	1	1	4	1	0	1	0	0	1	0	1	0	1	64	35	36	46	16	0	1	16	1
0	0	0	1	1	1	F	62	23.5	0	123	7	0	0	98	150	86	8.59	131	0.146	7538	4.49	66.1	3.96	68.9	0	1	4	2	0	1	0	0	2	1	1	0	0	12	38	36	72	20	0	0	31	1
0	0	0	1	1	1	M	65	23.42	2	132	5	0	0	95	135	85	12.71	288	0.022	1060	12.63	34.2	3.02	69	0	1	4	1	1	1	0	0	1	1	2	0	1	60	28	36	39	19	0	0	75	0
0	0	0	1	1	0	M	66	18	1	126	5	0	0	60	137	78	7.24	162	1.51	409	6.67	21.7	2.21	69	1	1	4	1	0	1	0	0	1	0	0	0	1	75	41	38	41	17	0	0	64	0
0	0	0	1	0	1	M	52	20.76	1	125	1	1	0	72	120	85	8.85	279	0.095	1592	6.85	63	1.53	69	1	1	4	1	0	1	1	0	2	0	1	0	1	60	39	35	45	20	0	0	64	0
0	0	0	1	1	1	M	63	23.42	1	159	1	1	0	42	140	100	12.87	141	6.63	2587	4.82	41.6	2.74	69	1	1	4	2	0	0	1	0	1	0	0	0	1	57	38	37	46	16	0	0	67	0
0	0	0	1	1	0	M	77	22.27	1	131	5	0	0	61	130	95	10.74	220	0.172	9500	4.69	46.5	2.53	69	1	1	4	1	0	1	1	0	2	1	2	0	1	61	43	34	47	17	0	0	45	0
0	0	0	1	1	1	M	72	22.15	1	163	1	1	0	78	115	75	16.52	259	0.459	2587	5.04	29.6	3.55	69	1	1	7	1	0	1	0	0	1	1	0	0	1	42	38	36	48	21	0	0	72	0
0	0	0	1	0	0	M	78	23.42	1	106	5	0	0	80	105	60	10.34	174	4.52	7600	4.51	78.1	3.38	69	0	1	4	2	0	1	0	0	2	0	1	0	1	41	42	37	48	17	0	0	47	0
0	0	0	1	0	0	M	65	23.42	1	141	7	0	0	60	155	70	8.74	349	0.242	300	5.19	18.2	2.88	69	1	1	4	1	0	1	0	0	1	0	1	0	1	44	33	33	49	18	0	0	48	0
0	0	0	1	0	0	M	49	26.06	1	97	1	0	0	82	160	80	6.5	259	0.878	2729	6.3	43.1	3.27	69	1	1	4	1	0	1	0	0	2	1	1	0	1	51	35	35	49	19	0	0	90	0
0	0	0	1	1	0	F	68	23.42	0	121	5	0	0	90	135	80	11.24	176	12	4547	6.53	39.5	2.99	69	0	1	4	2	0	0	0	0	0	0	1	0	1	55	33	38	49	20	0	0	78	0
0	0	0	1	1	0	M	49	23.42	1	169	2	1	0	70	130	70	9.73	296	0.122	100	4.26	66.6	3.17	69	1	1	4	1	0	1	0	0	1	0	1	0	1	48	33	30	50	17	0	0	49	0
0	0	0	1	1	0	M	47	34.29	1	150	1	1	0	72	150	90	12.57	214	0.458	1816	6.67	23	2.09	69	1	1	4	1	0	1	0	0	1	0	1	0	1	55	32	30	50	20	0	0	90	0
0	0	0	1	1	0	F	62	19.72	0	133	5	0	0	85	108	78	15.61	213	37	2239	6.86	84.9	1.65	69	0	1	4	2	0	0	0	0	1	0	1	0	1	34	36	32	52	16	0	0	86	0
0	0	0	1	0	0	F	67	17.67	0	129	5	0	0	83	110	80	9.82	142	0.658	10401	11.73	14.8	3.27	69	0	1	4	3	0	0	0	0	1	1	1	0	1	51	36	36	52	16	0	0	88	0
0	0	0	1	0	0	M	40	29.38	1	137	1	0	0	98	133	82	11.8	189	1.88	357	4.29	25	4.72	69	1	1	4	1	0	0	0	0	1	1	2	0	1	64	31	34	53	15	0	0
0	0	0	1	0	0	M	81	21.45	0	108	0	0	0	68	120	70	13.15	124	11	4300	5.05	296.8	3.01	69	1	1	4	1	0	0	0	0	2	1	1	0	1	45	32	33	55	20	0	0	46	0
0	0	0	1	0	0	F	64	20.12	0	141	5	0	0	87	158	98	10.82	90	0.42	1354	5.19	40.6	4.03	69.3	1	1	1	1	0	0	0	0	1	1	1	0	1	45	34	35	42	19	0	0	68	0
0	0	0	1	0	0	F	79	23.56	0	128	3	0	0	64	150	80	10.17	126	0.151	269	4.26	21.1	2.3	69.3	1	1	4	1	0	1	0	0	2	0	1	0	1	65	39	37	49	19	0	0	78	0
0	0	0	1	0	0	F	80	23.42	0	124	5	0	0	82	145	85	11.86	158	6.96	9884	4.66	51.5	3.06	69.8	0	1	4	2	0	1	0	0	2	1	2	0	1	35	55	64	57	25	0	0	48	1
0	0	0	1	1	0	M	57	19.84	1	130	3	1	0	89	120	70	18.36	286	10	411	9.54	193.9	3.38	69.9	1	1	4	1	0	1	0	0	1	0	1	0	1	40	33	32	49	18	0	0	83	0
0	0	0	1	1	0	M	59	23.31	1	115	0	0	0	98	120	87	9.42	216	3.94	5974	5.04	30.7	3.3	69.9	0	1	4	2	0	0	0	0	1	0	1	0	1	30	26	29	50	15	0	0	103	0
0	0	0	1	0	1	M	60	23.31	2	143	0	0	0	70	125	85	12.38	146	4.42	229	10.03	26.8	2.7	70	1	1	4	2	0	0	0	0	1	1	0	0	1	65	35	35	41	21	0	0	80	0
0	0	0	1	0	0	F	55	22.63	1	128	5	0	0	110	133	80	11.93	194	2.74	24	4.83	94.3	3.09	70	1	1	4	1	0	0	0	0	1	0	0	0	1	49	35	35	42	19	0	0	53	0
0	0	0	1	0	0	M	67	30.84	1	131	5	0	0	98	180	90	12.34	196	10	650	6.13	93.4	2.99	70	1	1	4	1	0	1	0	0	1	0	0	0	1	53	42	32	44	21	0	0	54	0
0	0	0	1	1	0	M	64	21.22	1	145	5	0	0	102	113	85	9.85	215	0.013	669	6.57	62.9	2.94	70	1	1	0	2	0	1	0	0	0	0	0	0	1	45	37	39	44	21	0	0	65	0
0	0	0	1	1	1	F	68	26.22	0	139	5	0	0	66	122	68	6.87	163	0.045	100	8.26	30.1	2.6	70	1	1	4	1	0	1	0	0	0	1	1	0	1	50	30	33	45	20	0	0	49	0
0	0	0	1	0	0	M	47	23.73	1	156	5	0	0	56	180	110	15.32	222	16	28	5.93	85	3.4	70	1	1	5	1	0	0	0	0	0	0	0	0	1	60	25	26	46	25	0	0	79	0
0	0	0	1	0	1	M	53	19.96	1	120	0	0	0	58	130	70	11.66	141	10	2587	3.9	31.1	3.53	70	0	1	4	1	0	1	0	0	1	0	1	0	1	53	35	35	48	18	0	0	60	0
0	0	0	1	0	0	M	44	21.45	0	148	5	1	0	90	150	110	17.21	330	1.91	2587	8.78	29.2	3.47	70	1	1	4	1	1	1	0	0	1	0	1	0	1	51	32	32	49	17	0	0	71	0
0	0	0	1	1	0	F	59	28.76	0	131	0	1	1	101	120	71	3.88	130	0.693	100	15.55	8.7	1.26	70	1	1	0	1	1	0	1	1	2	0	1	0	0	44	29	31	50	17	0	0	44	0
0	0	0	1	0	0	M	42	23.94	1	136	0	0	1	76	100	65	10.51	145	0.211	794	5.47	41.6	1.24	70	1	1	4	1	0	0	0	0	1	0	1	0	1	58	35	47	51	20	0	0	84	0
0	0	0	1	0	1	M	82	18.93	1	116	0	0	0	80	125	75	24.99	286	0.41	938	4.08	86	3.04	70	0	1	0	2	0	0	0	0	1	1	1	0	1	48	35	35	52	19	0	0	63	0
0	0	0	1	1	0	M	45	25.35	1	124	5	0	0	95	137	88	4.77	235	1.14	100	5.13	28.5	1.63	70	1	1	4	2	0	1	0	0	0	0	1	0	1	45	29	32	53	19	0	0	51	0
0	0	0	1	0	0	M	65	23.42	1	98	0	0	0	77	110	80	6.56	69	8.38	308	6.49	32.8	2.65	70	1	1	5	1	0	1	0	0	1	0	1	0	1	44	35	35	55	19	0	0
0	0	0	1	0	0	M	61	23.42	1	143	0	0	0	80	115	75	12.88	175	0.42	391	7.46	22.5	3.06	70	1	1	4	1	0	0	0	0	1	1	1	0	0	66	36	38	55	18	0	0	54	0
0	0	0	1	1	1	F	66	21.48	0	143	5	0	0	65	110	80	14.07	171	4.57	137	10.22	29.7	2.65	70.3	1	1	4	2	0	0	0	0	0	0	0	0	0	37	30	37	40	15	0	0	65	0
0	0	0	1	1	0	M	58	26.57	1	142	3	0	0	72	90	70	7.5	171	0.645	3804	5.83	36.6	3.03	70.3	1	1	1	1	0	0	0	0	1	1	0	0	1	52	36	36	51	17	0	0	76	0
0	0	0	1	1	1	M	57	24.09	2	111	4	0	0	86	160	90	8.48	196	2.95	58	5.56	5.5	3.35	70.5	0	1	4	1	0	1	0	0	0	0	1	0	1	72	35	35	44	19	0	0	71	0
0	0	0	1	0	0	M	63	23.42	1	120	5	0	0	60	140	85	7.31	201	0.064	26	5.9	15.7	2.75	70.5	0	1	5	2	0	1	0	0	3	1	0	0	0	55	46	30	49	30	0	0	73	0
0	0	0	1	0	0	M	70	23.74	0	131	5	0	0	90	120	70	12.43	184	0.607	315	4.99	41.6	2.97	70.5	1	1	5	1	0	1	0	0	1	0	0	0	1	45	27	28	54	14	0	0
0	0	0	1	0	1	M	53	23.15	0	165	5	0	0	80	120	75	4.05	130	0.028	2587	7.78	12.7	4.72	70.6	1	1	4	2	0	1	0	0	1	0	1	0	1	39	35	35	48	19	0	0	68	0
0	0	0	1	1	0	M	66	19.83	1	104	5	0	0	87	131	86	8.62	186	0.095	1100	4.36	11.4	0.78	71	1	1	4	1	0	1	0	0	2	0	0	0	1	61	55	45	42	20	0	0	49	0
0	0	0	1	0	1	M	50	24.62	1	120	1	0	0	78	170	120	8.12	225	0.064	100	8.54	26.5	4.23	71	1	1	4	1	0	0	0	0	1	0	0	0	1	45	33	35	43	19	0	0	47	0
0	0	0	1	1	1	F	79	24.97	0	127	5	0	0	65	160	100	9.02	152	0.199	1456	6.2	13.5	2.77	71	0	1	4	1	0	1	0	1	1	1	1	0	1	45	35	35	44	19	0	0	1	1
0	0	0	1	0	1	M	56	19.57	0	156	1	0	0	90	151	70	8.06	224	0.004	58	4.05	21.7	2.56	71	1	1	4	1	0	0	0	0	1	0	1	0	1	71	38	35	45	20	0	0	72	0
0	0	0	1	1	0	F	79	25.71	1	130	5	0	0	118	140	80	14.4	313	23	530	6.61	76.2	3.25	71	1	1	4	2	0	0	0	0	0	0	1	0	1	45	29	31	45	18	0	0
0	0	0	1	1	0	M	31	23.42	0	118	5	0	0	91	188	110	11.75	146	9.76	615	4.93	40.6	2.43	71	0	1	4	1	0	0	0	0	1	0	1	0	1	64	38	38	45	19	0	0	60	0
0	0	0	1	1	0	M	54	24.62	1	123	5	0	0	86	160	90	7.9	956	0.258	130	4.53	59.8	3.64	71	1	1	4	1	0	1	0	0	1	0	1	0	1	32	35	35	46	19	0	0	45	0
0	0	0	1	1	1	M	73	19.05	1	129	5	0	0	58	125	70	10.61	147	10	155	4.7	75.6	2.44	71	0	1	4	2	0	0	1	0	2	1	1	0	1	64	34	38	46	19	0	0	86	0
0	0	0	1	0	1	M	55	23.42	1	126	0	0	0	66	119	75	10.35	222	10	328	6.27	39	2.33	71	1	1	4	2	1	0	0	0	1	0	1	0	1	56	33	39	47	18	0	0	75	0
0	0	0	1	0	1	F	76	17.78	0	117	0	0	0	70	120	75	11.3	154	0.031	3918	5.64	23.7	2.78	71	0	1	4	3	0	1	0	0	1	0	1	0	1	47	35	35	48	19	0	0	1	1
0	0	0	1	0	0	M	52	20.94	1	107	5	0	0	80	130	90	6.54	105	0.136	42	4.8	45	1.78	71	0	1	4	1	0	1	0	0	0	0	1	0	1	51	41	38	49	18	0	0	76	0
0	0	0	1	0	0	F	75	20	0	111	0	0	0	76	150	80	9.05	134	4.73	1240	4.72	21.3	2.65	71	1	1	4	1	0	0	0	0	1	1	1	0	1	63	35	38	49	20	0	0	68	0
0	0	0	1	1	0	M	71	28.39	0	154	7	0	0	78	150	90	9.43	208	0.566	1455	5.29	41.6	2.39	71	1	1	4	1	0	1	0	0	1	1	1	0	1	57	35	35	49	19	0	0	72	0
0	0	0	1	0	1	M	49	22.84	0	127	0	0	0	72	122	85	14.57	174	0.046	21	5.1	147.5	1.76	71	1	1	4	1	0	0	0	0	1	0	1	0	0	61	33	36	52	20	0	0	69	0
0	0	0	1	1	1	M	57	23.42	1	136	5	0	0	95	145	90	9.15	192	0.168	2587	6.86	11.4	2.77	71	1	1	4	1	1	0	0	0	1	1	1	0	1	34	33	31	56	20	0	0	67	0
0	0	0	1	0	1	M	70	24.8	0	145	0	0	0	72	130	70	7	107	0.151	858	4.61	17.1	3.73	71	1	1	4	1	0	1	0	0	1	1	1	0	1	51	35	35	64	19	0	0	74	0
0	0	0	1	1	0	M	47	27.66	1	132	5	0	0	62	150	80	10.25	222	7.48	254	4.45	33.57	2.91	71.2	1	1	4	1	0	0	0	0	1	0	1	0	1	51	28	40	49	18	0	0	77	0
0	0	0	1	1	0	M	53	22.86	1	155	5	0	0	85	108	71	8.2	225	0.799	46	6.86	23.5	2.84	71.3	1	1	4	1	0	0	0	0	0	0	1	0	1	64	35	35	49	19	0	0	72	0
0	0	0	1	1	0	F	73	23.42	2	90	5	1	0	80	110	60	11.57	221	3.84	157	5.31	14.5	3.81	71.6	1	1	4	1	0	1	0	0	2	0	2	0	1	50	32	32	49	11	0	0	66	0
0	0	0	1	0	0	M	64	24.8	0	137	7	0	0	80	135	80	6.65	159	0.637	1941	6.08	23.6	3.23	71.7	1	1	4	2	0	1	0	0	0	0	1	0	0	51	29	30	49	19	0	0	80	0
0	0	0	1	1	0	M	66	21.26	1	153	5	0	0	76	117	78	14.04	168	3.9	440	5.55	52.1	2.66	71.8	1	1	4	1	0	0	0	0	0	1	1	0	1	63	30	34	43	16	0	0	82	0
0	0	0	1	0	1	M	49	23.42	1	122	0	0	0	95	158	96	14.46	154	4.8	169	4.44	93.2	3.02	71.8	1	1	4	1	0	0	0	0	2	0	2	0	1	57	44	53	45	19	0	0	74	0
0	0	0	1	1	0	M	53	21.61	1	129	1	0	0	88	140	80	7.52	180	2.17	353	5.89	41.6	3.01	71.9	1	1	4	1	0	1	0	0	1	0	1	0	1	58	43	34	33	21	0	0	91	0
0	0	0	1	0	0	M	54	27.64	0	102	5	0	0	88	140	80	14.58	148	6.51	100	5.07	21.7	3.4	72	1	1	4	2	0	1	0	0	2	1	1	0	1	62	38	37	43	20	0	0	47	0
0	0	0	1	1	0	F	78	23.42	1	101	0	0	1	62	95	60	12.19	175	10	17375	3.38	67.2	1.56	72	0	1	4	2	0	1	0	0	3	0	1	0	1	41	37	45	44	19	0	0	21	1
0	0	0	1	0	0	F	85	23.42	1	163	5	0	0	80	100	72	8.07	198	1.42	2901	5.51	74.2	2.5	72	1	1	4	2	0	0	0	0	1	1	0	0	0	55	35	35	46	19	0	0	31	1
0	0	0	1	0	0	M	77	27.89	1	131	3	0	0	90	150	80	6.44	130	0.236	158	5.24	22.2	2.39	72	0	1	4	2	0	0	0	0	1	0	1	0	1	73	35	35	49	19	0	0	89	0
0	0	0	1	1	1	M	63	21.26	2	155	5	0	0	70	120	80	7.47	202	0.017	2587	4.48	22.9	2.69	72	1	1	4	1	0	0	0	0	0	0	0	0	1	60	35	35	50	19	0	0	86	0
0	0	0	1	0	1	M	76	23.42	1	118	3	0	0	72	170	115	10.17	141	0.038	2587	8.13	41.7	3.32	72	1	1	4	2	0	0	0	0	1	0	1	0	1	65	36	35	50	19	0	0	1	1
0	0	0	1	1	1	M	39	23.42	1	128	7	0	0	62	100	57	8.16	186	0.011	22	3.23	39.9	2.09	72	1	1	4	1	0	1	0	0	0	0	1	0	1	59	37	32	51	18	0	0	59	0
0	0	0	1	0	0	M	61	26.26	0	132	3	0	0	98	120	80	16.42	128	49	462	5.79	128.1	2.04	72	1	1	5	1	0	1	0	1	2	1	1	0	0	41	43	43	51	20	0	0	49	0
0	0	0	1	1	1	M	39	23.42	1	121	5	0	0	105	130	90	8.54	224	0.206	1843	4.61	25.2	2.63	72	1	1	4	1	0	0	0	0	1	1	0	0	1	42	37	33	55	19	0	0	69	0
0	0	0	1	0	0	M	67	23.38	0	147	5	0	0	70	165	90	8.22	91	3.08	2587	6.86	37.9	2.16	72	1	1	4	2	0	0	0	0	1	0	1	0	1	56	35	35	58	19	0	0	55	0
0	0	0	1	0	0	M	74	24.22	1	112	7	0	0	71	159	98	14.21	232	2.19	290	5.09	41.6	3.77	72	1	1	4	1	0	1	0	0	0	1	1	0	1	40	35	35	60	19	0	0	70	0
0	0	0	1	0	0	F	68	20.81	0	107	5	0	0	75	135	80	9.68	327	8.8	5464	4.34	25	3.6	72.7	1	1	4	2	0	1	0	0	2	1	1	0	1	36	38	30	60	18	0	0	68	0
0	0	0	1	0	0	M	58	25.61	1	130	5	0	0	60	145	81	19.48	200	0.921	222	5.68	22.9	1.82	72.9	0	1	4	1	0	0	0	0	2	0	2	0	1	64	38	34	45	19	0	0	65	0
0	0	0	1	0	0	M	73	20.76	1	129	5	0	0	85	140	80	12.44	243	1.18	1475	4.08	103.1	2.94	73	1	1	4	1	0	0	0	0	1	0	0	0	1	45	35	36	42	16	0	0	62	0
0	0	0	1	1	0	M	75	21.62	1	157	5	0	0	58	130	70	13.79	196	2.54	100	5.72	126	1.86	73	1	1	4	1	0	1	0	0	0	1	0	0	1	58	33	33	43	21	0	0	47	0
0	0	0	1	1	0	M	51	22.49	1	107	1	0	0	80	112	88	7.87	156	0.03	190	6.86	18.9	3.43	73	1	1	4	1	0	1	0	0	1	1	1	0	1	55	38	35	44	19	0	0	32	1
0	0	0	1	1	0	M	54	26.45	2	133	4	0	1	78	134	78	5.72	186	1.56	126	5.1	15.2	3.33	73	1	1	4	1	0	1	0	0	1	0	1	0	1	45	38	38	45	21	0	0
0	0	0	1	1	1	F	70	19.98	0	117	7	0	0	80	142	82	9.37	222	14	2869	5	33.7	2.38	73	0	1	4	2	0	1	0	0	0	0	1	0	1	60	47	36	45	18	0	0	56	0
0	0	0	1	0	1	M	48	23.24	1	133	5	0	0	76	126	83	6.16	215	3.31	91	6.96	23.1	2.51	73	1	1	4	1	0	0	0	0	1	0	1	0	1	51	35	35	46	19	0	0	82	0
0	0	0	1	0	1	M	37	21.72	1	143	0	0	0	111	133	80	7.79	151	6.83	2587	13.69	36.6	5.19	73	1	1	4	1	1	0	0	0	1	0	1	0	1	48	35	35	46	19	0	0	60	0
0	0	0	1	1	0	M	45	23.51	1	147	5	0	1	62	135	90	13.12	200	0.156	436	5.75	55.1	3.21	73	1	1	4	2	0	0	0	0	1	0	0	0	1	58	35	35	47	19	0	0	64	1
0	0	0	1	0	0	M	37	23.42	1	134	5	0	0	65	140	100	12.78	234	2.6	2587	4.93	94.9	4.35	73	1	1	4	1	0	0	0	0	1	0	1	0	1	62	27	40	47	20	0	0	58	0
0	0	0	1	0	1	M	67	19.31	1	117	1	0	0	76	145	80	8.95	192	5.37	3068	6.25	28.9	1.09	73	0	1	4	1	0	0	0	0	1	0	1	0	1	44	35	35	47	19	0	0	57	0
0	0	0	1	1	0	M	77	29.38	1	127	5	0	1	85	123	77	9.98	145	59	631	6.75	31.9	3.88	73	1	1	5	2	0	0	0	0	2	0	1	0	1	51	29	34	49	19	0	0	70	0
0	0	0	1	0	1	F	72	23.56	2	118	1	0	0	56	140	80	9.32	161	10	2354	5.64	92.5	3.85	73	0	1	4	2	0	0	0	0	0	0	0	0	0	36	35	37	49	18	0	0	66	0
0	0	0	1	1	0	F	72	26.03	0	139	5	0	0	80	220	110	6.55	135	0.673	8245	6.64	26.5	2.19	73	1	1	4	2	0	0	0	0	1	0	1	0	1	52	35	39	50	20	0	0	91	0
0	0	0	1	1	1	M	64	23.21	1	111	5	0	0	98	150	100	11.66	239	1.19	115	4.48	80.2	3	73	0	1	4	1	0	0	0	0	1	1	2	0	1	47	31	30	52	16	0	0	57	0
0	0	0	1	0	1	M	48	25.1	1	146	7	0	0	80	110	70	11.81	257	0.035	2800	5.97	16.4	2.12	73	1	1	4	1	0	1	0	0	1	1	1	0	1	41	35	35	55	19	0	0	47	0
0	0	0	1	0	1	M	48	22.66	1	150	5	0	0	82	120	80	9.99	267	1.44	113	6.76	50.7	6.44	73	1	1	4	1	0	0	0	0	1	1	0	0	1	33	29	32	58	20	0	0	54	0
0	0	0	1	1	0	F	64	19.72	0	136	7	0	0	90	120	70	10.24	155	1.22	80	5.57	18.9	4.5	73.1	1	1	1	1	0	1	0	0	0	0	1	0	1	55	35	35	41	19	0	0	69	0
0	0	0	1	0	1	M	71	21.61	1	140	7	1	0	76	165	110	10.54	181	1.63	1604	6.86	41.6	3.32	73.7	1	1	4	1	1	1	0	0	1	1	0	0	1	48	35	39	56	20	0	0
0	0	0	1	0	1	M	67	23.42	1	120	4	0	0	50	82	42	14.28	177	38	706	5.78	41.6	2.48	73.8	1	1	4	4	0	0	0	0	1	1	0	0	1	55	35	33	49	16	0	0	83	0
0	0	0	1	1	0	M	79	24.77	0	155	1	0	0	88	150	90	13.29	202	0.4	1026	6.57	84.4	1.96	74	1	1	4	1	1	0	0	0	0	1	0	0	0	69	35	35	41	17	0	0	80	0
0	0	0	1	0	1	M	61	26.45	2	124	5	0	0	70	120	70	7.31	148	10	1200	3.99	88.2	3.45	74	1	1	4	1	0	1	1	0	1	1	0	0	1	51	31	35	43	17	0	0	52	0
0	0	0	1	0	0	F	89	22.51	0	107	5	0	0	74	100	60	5.22	209	0.283	16000	5.53	9.5	2.68	74	0	1	4	2	0	0	0	0	2	1	1	0	1	50	35	35	43	19	0	0	44	0
0	0	0	1	1	1	M	59	23.42	1	126	3	0	0	75	130	90	11.2	187	7.65	109	6.2	41.6	2.71	74	0	1	4	2	0	0	0	0	1	0	1	0	1	41	26	35	44	19	0	0	68	0
0	0	0	1	1	0	F	48	21.48	0	132	5	1	0	82	110	70	14.05	172	1.92	1419	9.72	20.9	0.82	74	0	1	4	1	0	1	0	0	1	0	1	0	1	46	35	34	46	18	0	0	85	0
0	0	0	1	1	1	M	84	21.97	1	154	5	0	0	48	130	76	14.52	230	12	132	5.21	31.6	2.48	74	1	1	4	1	0	1	0	0	0	0	1	0	1	51	35	37	49	19	0	0	81	0
0	0	0	1	0	0	F	67	23.42	0	105	1	0	0	75	180	80	10.61	204	15	419	4.69	54	2.55	74	0	1	4	2	0	0	0	0	1	1	1	0	1	40	34	33	50	20	0	0	78	0
0	0	0	1	0	0	M	42	31.25	1	142	5	0	0	88	120	70	9.27	203	0.049	880	8.73	62.8	2.08	74	1	1	4	1	0	0	0	0	1	0	1	0	1	73	35	35	50	19	0	0	36	1
0	0	0	1	1	1	F	86	23.42	0	124	5	0	0	77	160	40	8.8	217	0.073	35000	8.05	91	1.61	74	0	1	4	1	0	1	0	0	1	2	0	0	1	45	35	35	55	19	0	0	27	1
0	0	0	1	0	0	M	67	25.95	1	112	7	0	0	72	170	120	10.3	265	0.666	5911	6.49	14.2	2.43	74.3	1	1	4	2	0	1	1	0	1	0	1	0	1	55	38	35	49	16	0	0	55	1
0	0	0	1	0	1	M	55	27.12	1	133	5	0	0	64	91	69	10.74	193	2.72	73	5.61	36.8	1.93	74.4	1	1	4	2	1	0	0	0	1	0	1	0	1	60	37	34	49	18	0	0	78	0
0	0	0	1	1	0	M	71	21.8	1	110	5	0	0	89	110	70	9.9	219	0.321	221	9.23	41.6	2.77	74.9	0	1	4	1	0	1	0	1	1	0	0	0	1	56	34	36	49	18	0	0	78	0
0	0	0	1	1	1	M	55	23.42	1	132	5	0	0	98	140	100	7.86	166	0.158	100	5.72	17.1	2.3	75	1	1	4	1	0	1	0	0	1	0	0	0	1	69	28	33	43	17	0	0	39	1
0	0	0	1	1	0	M	50	26.67	1	143	1	0	0	100	145	103	12.92	216	0.809	100	13.35	23.8	2.02	75	1	1	4	2	1	1	0	0	1	0	1	0	1	63	38	35	45	19	0	0	60	0
0	0	0	1	1	0	M	45	24.49	1	132	5	0	0	80	95	70	8.1	198	0.397	256	7.27	13.7	2.89	75	1	1	4	2	0	0	0	0	1	0	1	0	0	53	35	35	45	19	0	0	69	0
0	0	0	1	0	0	F	80	23.42	0	128	1	0	0	40	136	78	14.85	204	0.706	1392	6.02	100.8	2.34	75	1	1	4	1	0	0	0	0	1	0	1	0	1	48	35	31	45	20	0	1
0	0	0	1	0	0	M	79	17.72	1	131	1	0	0	58	152	80	6.1	126	0.874	192	3.29	320.5	2.11	75	1	1	4	1	0	1	0	0	1	0	1	1	1	60	34	34	46	20	0	0	62	0
0	0	0	1	0	1	F	69	20.03	0	111	5	0	0	86	108	72	7.48	231	10	1300	7.09	41.6	1.74	75	0	1	4	1	1	1	0	0	2	1	1	0	1	57	35	35	46	19	0	0	46	0
0	0	0	1	0	0	M	52	23.88	2	144	5	0	0	90	120	80	8.58	166	2.37	2587	6.31	10.2	2.71	75	1	1	4	2	0	1	0	0	1	1	1	0	1	46	35	35	46	19	0	0	54	0
0	0	0	1	0	0	M	56	22.04	1	104	3	0	0	70	122	82	3.76	163	0.891	122	4.11	6.6	2.7	75	1	1	4	1	0	1	0	0	2	0	1	0	1	59	38	35	47	18	0	0	89	0
0	0	0	1	1	0	M	42	24.22	0	122	5	0	0	95	145	100	5.87	213	0.064	2587	7.37	93.7	6.99	75	1	1	4	2	1	1	0	0	1	0	1	0	1	47	27	32	48	19	0	0	48	0
0	0	0	1	0	0	M	45	22.72	1	112	0	0	0	67	120	82	10.78	139	5.87	33	12.19	85.9	3.66	75	0	1	4	1	1	1	0	0	1	0	1	0	1	45	40	39	49	19	0	0	74	0
0	0	0	1	1	1	M	65	21.45	0	155	5	0	0	70	120	80	11.64	239	0.009	523	4.86	41.6	3.36	75	1	1	4	1	0	1	1	0	1	1	1	0	1	51	35	36	49	18	0	0	89	0
0	0	0	1	1	1	M	63	26.08	1	160	5	0	0	56	125	70	14.52	281	0.092	2587	6.1	149.9	1.88	75	1	1	4	1	0	0	0	0	1	0	1	0	1	50	36	31	49	20	0	0	94	0
0	0	0	1	0	0	F	67	26.04	0	143	0	0	0	74	130	70	11.48	291	6.48	3472	6.89	30.2	3.93	75	0	1	4	1	0	0	0	0	1	1	1	0	0	51	30	38	49	17	0	0	10	1
0	0	0	1	0	0	M	61	26.93	0	132	5	0	0	100	136	75	5.9	149	0.627	23	5.68	12.3	4.58	75	1	1	4	1	0	1	0	0	1	0	0	0	1	55	28	30	51	17	0	0	69	0
0	0	0	1	0	1	M	71	21.09	1	161	0	0	0	68	110	70	20.33	308	0.026	41	5.18	17	2.2	75	1	1	4	2	0	0	0	0	1	0	1	0	1	38	19	33	51	19	0	0	56	0
0	0	0	1	1	0	M	50	25.95	0	118	5	0	0	105	135	105	14.39	199	1.28	2435	6.59	46.5	3.86	75	1	1	4	3	0	1	0	0	1	1	1	0	1	42	35	32	55	18	0	0	69	0
0	0	0	1	1	0	F	78	23.42	0	99	5	0	0	80	170	110	4.79	236	0.5	2600	5.21	31.4	3.79	75	1	1	4	1	0	1	0	0	0	1	2	0	1	40	35	35	56	20	0	0	47	0
0	0	0	1	0	1	M	44	20.24	0	137	1	0	0	45	105	60	10.09	208	0.018	1600	6.57	138.9	2.87	75	1	1	4	1	0	1	0	0	2	0	1	0	1	40	33	32	62	20	0	0	47	0
0	0	0	1	0	1	M	79	23.42	1	141	5	0	0	69	106	70	7.71	231	26	365	4.51	50.9	1.95	75.2	0	1	5	1	0	1	0	0	0	1	0	0	1	63	32	33	40	18	0	0	67	0
0	0	0	1	1	0	M	65	15.63	0	156	5	0	0	80	175	115	10.41	228	12	1688	4.12	43.2	4.78	75.3	0	1	5	1	0	1	0	0	1	1	0	0	1	30	34	36	56	18	0	0	70	0
0	0	0	1	0	0	M	60	23.88	1	133	1	0	0	79	112	80	13.79	188	0.009	861	14.45	21.8	2.45	75.4	1	1	4	1	1	0	0	0	0	0	0	0	1	53	34	37	54	22	0	0
0	0	0	1	1	0	M	72	23.42	0	172	5	0	0	105	165	100	8.21	162	3.22	43	7.64	12.6	2.26	75.7	1	1	4	2	1	1	0	0	0	0	1	0	1	58	35	37	50	20	0	0	91	0
0	0	0	1	1	0	M	57	22.31	0	135	5	0	0	61	150	100	6.16	146	0.557	51	9.08	38.7	1.95	76	1	1	4	1	0	0	0	0	1	0	1	0	1	55	35	35	43	19	0	0	63	0
0	0	0	1	1	0	M	67	18.96	2	139	7	0	0	48	125	70	7.72	130	0.658	73	4.53	44.7	2.33	76	1	1	4	1	0	1	0	0	0	0	1	0	1	74	35	35	44	19	0	0	58	0
0	0	0	1	1	0	M	49	32.79	0	122	5	0	0	70	165	78	11.08	294	2.57	69	8.31	26.8	2.73	76	1	1	4	2	0	0	0	0	1	0	1	0	1	63	27	30	48	17	0	0	59	0
0	0	0	1	0	0	M	52	22.49	1	86	1	0	0	68	134	92	6.86	321	1.31	2587	5.33	11.3	4.3	76	1	1	4	1	0	1	0	0	2	0	1	0	1	51	35	35	48	19	0	0	71	0
0	0	0	1	0	1	M	60	23.42	0	114	5	0	0	57	138	88	11.86	279	10	66	4.46	42.4	2.25	76	0	1	4	1	0	1	0	0	1	0	1	0	1	51	30	34	49	14	0	0	91	0
0	0	0	1	1	1	M	45	26.33	1	116	5	0	0	61	110	60	7.14	276	0.057	877	4.74	51.5	2.85	76	1	1	4	1	0	1	0	0	0	2	0	0	1	46	27	29	50	18	0	0	57	0
0	0	0	1	1	0	F	82	23.42	0	114	5	0	0	93	124	87	8.03	282	0.257	3000	8.56	25.8	2.97	76	0	1	4	2	0	1	1	0	1	1	1	0	1	43	35	36	50	15	0	0	1	1
0	0	0	1	1	1	M	69	25.4	0	106	0	0	0	88	160	104	11.14	237	12	145	5.07	16.6	2.66	76	0	1	4	1	0	0	0	0	1	1	0	0	1	63	30	31	55	42	0	0	52	0
0	0	0	1	1	0	M	56	21.05	1	127	7	0	0	62	100	50	6.73	201	0.694	3000	11.12	109.6	2.12	76	0	1	4	1	1	1	0	0	1	1	1	0	1	40	35	33	55	19	0	0	48	0
0	0	0	1	1	0	M	49	26.4	1	145	5	0	0	72	100	70	11.69	148	2.79	3369	6.86	39.4	2.77	76	0	1	4	2	0	0	0	0	1	0	1	0	1	40	34	38	56	16	0	0	91	0
0	0	0	1	0	1	M	63	25.65	0	136	5	0	0	76	130	80	13.71	243	1.71	340	3.8	31	3.33	76.1	1	1	4	1	0	1	0	0	3	0	3	0	0	60	40	36	42	18	0	0	85	0
0	0	0	1	0	0	M	77	23.42	2	124	0	0	0	98	120	65	12.76	161	0.834	198	5.33	169.6	2.88	76.4	1	1	4	1	0	0	0	0	0	1	1	0	1	38	29	35	40	19	0	0	67	0
0	0	0	1	0	0	M	81	22.49	0	132	5	0	0	74	138	70	11.51	220	6.72	2198	6.56	65	2.07	76.4	0	1	4	2	0	1	0	0	0	0	1	0	1	51	39	33	49	20	0	0	86	0
0	0	0	1	1	1	M	36	20.61	1	128	5	0	0	96	151	87	6.7	199	10	2587	4.55	103.1	1.35	76.4	0	1	4	1	0	1	0	0	1	0	1	0	1	51	33	32	49	17	0	0	49	0
0	0	0	1	0	1	M	56	22.6	1	146	5	0	0	80	125	75	5.25	105	0.015	957	5.11	37	3.82	76.6	1	1	4	1	0	1	0	0	1	0	1	0	1	54	35	35	45	19	0	0	67	0
0	0	0	1	0	1	F	75	13.38	0	134	5	0	0	78	135	78	13.25	203	21	27939	4.86	37.5	3.23	76.8	0	1	4	2	0	1	0	0	2	1	1	0	1	31	40	33	56	21	0	0	81	0
0	0	0	1	1	0	M	66	29.38	0	128	5	0	0	100	120	72	7.01	155	1.66	197	8.64	19.6	2.83	76.9	1	1	4	1	1	0	0	0	2	0	1	0	0	51	21	32	49	15	0	0	79	0
0	0	0	1	1	0	M	69	23.15	0	117	0	0	0	87	150	96	7.24	345	0.04	80	5.58	10	0.79	77	1	1	0	1	0	1	0	0	1	1	1	0	1	66	28	30	43	16	0	0	81	0
0	0	0	1	0	0	M	49	21.8	0	117	5	0	1	78	90	60	17.28	148	10	12	4.3	57.8	2.52	77	1	1	4	1	0	1	0	0	2	0	1	0	1	70	36	37	44	20	0	0	78	0
0	0	0	1	0	1	M	58	23.42	1	145	5	0	1	78	170	115	14.96	225	0.11	15	7.89	41.6	2.31	77	1	1	5	1	0	0	0	0	2	0	1	0	0	75	37	35	44	19	0	0	84	0
0	0	0	1	0	0	F	69	23.28	0	134	3	0	1	76	160	85	12.03	233	0.083	849	5.54	138.7	1.8	77	1	1	4	2	0	1	0	0	2	0	1	0	1	55	38	35	44	19	0	0	57	0
0	0	0	1	0	0	M	61	24.22	1	123	5	0	0	95	150	95	11.24	193	2.61	717	4.46	76	3.3	77	1	1	4	1	0	0	0	0	0	0	0	0	1	70	36	39	46	19	0	0	65	0
0	0	0	1	0	0	M	77	23.42	0	117	0	0	0	60	100	62	9.78	167	1.23	4221	4.76	41.6	2.48	77	0	1	4	2	0	1	0	0	1	1	0	0	1	55	34	39	47	18	0	0	1	1
0	0	0	1	0	0	M	65	23.42	1	126	5	0	0	78	140	80	5.8	142	2.43	265	5.43	30.6	1.73	77	1	1	4	2	0	0	0	0	1	0	0	0	1	61	36	35	48	19	0	0	76	0
0	0	0	1	1	1	M	51	29.72	0	140	5	0	0	81	186	110	6.06	123	0.071	2587	5.86	19	5.27	77	1	1	4	1	0	0	0	0	1	1	2	0	1	70	35	35	48	19	0	0	94	0
0	0	0	1	1	1	M	69	22.1	1	137	7	0	0	76	130	80	8.05	150	0.5	2587	5.94	87.7	3.28	77	0	1	5	2	0	1	0	0	1	0	1	0	1	46	36	33	48	18	0	0	50	0
0	0	0	1	1	1	M	47	21.97	1	128	0	0	0	75	130	65	17	216	0.248	30	4.52	57.5	4.27	77	1	1	4	1	0	1	0	0	1	0	1	0	1	51	34	30	49	17	0	0	91	0
0	0	0	1	1	1	M	47	25	1	144	5	0	0	74	130	70	8.77	252	0.037	1352	5.28	45.9	2.35	77	1	1	4	1	0	0	0	0	0	0	1	0	1	54	38	33	50	19	0	0	93	0
0	0	0	1	0	1	M	61	25.4	1	154	6	0	0	86	130	80	10.95	254	0.703	1296	4.82	25.4	3.03	77	0	1	4	1	0	0	0	0	1	0	1	0	0	47	29	36	51	18	0	0	52	0
0	0	0	1	1	1	M	52	23.42	1	149	5	0	0	99	100	70	17.06	187	0.474	110	6.74	89	3.79	77	1	1	4	1	0	1	0	0	1	0	1	0	1	49	37	38	56	17	0	0	67	0
0	0	0	1	0	1	M	68	23.42	2	110	1	0	0	70	95	62	16.54	313	1.88	835	7.16	31.9	2.43	77.1	1	1	4	1	0	0	0	0	2	1	2	0	1	50	35	35	55	19	0	0	90	0
0	0	0	1	1	0	M	50	24.54	1	139	5	0	0	100	112	70	15.48	239	4.76	104	8.29	95.8	3.69	77.4	1	1	4	4	0	0	0	0	0	1	0	0	1	39	36	35	52	18	0	0	67	0
0	0	0	1	1	1	M	58	26.17	1	132	0	1	0	78	130	76	15.09	282	0.017	77	5.5	38	2.7	77.6	0	1	4	2	0	1	0	0	1	1	0	0	1	71	30	32	52	17	0	0	85	0
0	0	0	1	1	0	F	65	23.42	0	118	5	0	0	85	130	80	6.54	155	3.59	195	6.66	32.3	3.18	77.7	0	1	4	1	0	1	0	0	1	1	1	0	1	75	35	35	42	19	0	0	57	1
0	0	0	1	1	1	F	75	26.71	1	113	5	0	0	76	160	110	9.96	177	4.8	33	4.55	50.9	3.55	78	0	1	4	2	0	1	0	0	1	1	1	0	1	68	32	35	45	18	0	0	67	0
0	0	0	1	1	1	F	75	23.19	0	144	3	0	1	65	120	80	8.97	169	0.022	120	10.83	15	3.47	78	1	1	4	1	1	0	0	0	1	1	2	0	1	57	48	65	45	23	0	0	76	0
0	0	0	1	1	1	M	77	26.57	0	101	5	0	0	60	114	68	6.07	131	64	325	4.65	10.4	2.12	78	0	1	4	1	0	0	0	0	0	0	2	0	1	57	34	36	46	17	0	0	84	0
0	0	0	1	1	0	M	46	28.56	1	141	7	0	0	89	167	118	6.46	125	1.57	817	6.28	24.3	1.02	78	1	1	4	1	0	1	0	0	1	0	1	0	1	62	35	35	46	19	0	0	57	0
0	0	0	1	0	0	M	47	23.42	1	156	6	0	0	70	220	150	13.62	254	0.066	230	7.74	53.9	2.73	78	1	1	4	1	0	1	0	0	1	1	1	0	1	48	26	31	48	19	0	0	50	0
0	0	0	1	0	0	M	65	27.94	0	133	5	0	0	89	132	77	9.08	141	0.016	1617	6.58	55.5	2.44	78	0	1	4	1	1	1	0	0	0	0	1	0	1	40	34	39	48	20	0	0
0	0	0	1	0	0	M	62	27.48	0	151	5	0	0	62	102	60	8	152	16	561	5.23	60	1.82	78	1	1	4	1	0	0	0	0	1	0	0	1	0	51	31	30	49	30	0	0	58	0
0	0	0	1	1	1	M	75	23.42	1	137	5	0	0	84	117	84	9.77	120	10	3108	4.09	168.7	2.12	78	0	1	4	2	0	1	0	0	1	0	2	0	1	51	40	39	52	18	0	0	65	0
0	0	0	1	1	0	F	64	23.42	0	152	5	0	0	78	128	76	9.78	192	1.3	6886	7.58	32.2	2.54	78	1	1	4	1	1	0	1	0	0	1	0	0	1	51	30	30	52	16	0	0	91	0
0	0	0	1	1	1	F	81	21.23	0	124	5	0	1	63	110	60	8.99	214	0.221	6212	7.29	11.1	2.3	78	0	1	4	2	0	1	1	0	1	1	1	0	1	35	35	35	55	19	0	0	75	0
0	0	0	1	1	1	M	70	24.91	1	112	5	0	0	72	118	68	9.39	258	4.75	18000	7.43	46.9	2.94	78	0	1	4	1	0	1	0	0	0	1	1	0	1	46	33	30	55	18	0	0	45	0
0	0	0	1	1	0	M	55	22.99	2	129	5	0	0	80	110	65	11.32	192	0.515	37	5.92	28.6	2.96	78.2	1	1	4	1	0	1	0	0	2	0	1	0	1	54	38	35	40	19	0	0	76	0
0	0	0	1	0	1	M	65	23.42	1	147	5	0	0	52	120	80	10.75	184	0.147	146	5.79	40.9	2.4	78.2	1	1	4	2	0	0	0	0	1	0	1	0	1	62	33	36	44	18	0	0	76	0
0	0	0	1	0	0	M	37	26.83	1	119	0	0	0	78	130	90	10.82	236	7.1	277	8.23	22.8	1.88	78.2	1	1	4	1	0	0	0	0	1	1	1	0	1	62	29	34	49	18	0	0	84	0
0	0	0	1	1	0	M	55	23.42	1	119	5	0	0	75	115	75	6.72	170	3.53	65	5.53	33	3.05	78.5	1	1	4	1	0	0	0	0	0	0	1	0	1	60	35	35	41	19	0	0	72	0
0	0	0	1	0	0	M	67	23.88	1	130	1	0	0	110	119	86	15.87	130	18	2067	8.57	41.4	3.05	78.5	1	1	4	3	0	1	0	0	0	0	2	0	1	34	37	38	58	20	0	0	96	0
0	0	0	1	0	0	M	69	23.42	1	144	0	0	0	119	101	69	13.56	130	6.85	5027	6.52	89.5	1.88	78.6	0	1	4	3	0	0	0	0	1	0	1	0	1	51	36	38	49	18	0	0	1	1
0	0	0	1	0	1	M	71	21.97	0	115	5	0	1	105	180	110	8.95	308	64	6059	4.79	41.6	2.36	78.7	1	1	4	2	0	0	0	0	1	1	0	0	1	38	33	31	60	17	0	0	1	1
0	0	0	1	1	0	F	74	23.62	0	137	5	0	0	93	156	115	10.46	297	1.05	157	5.37	42.2	2.52	78.9	0	1	4	1	0	0	0	0	1	0	1	0	1	51	37	38	49	21	0	0
0	0	0	1	0	1	F	78	22.89	0	128	5	0	0	108	120	70	11.1	205	1.41	128	5.05	19.7	0.98	79	1	1	4	1	0	1	0	0	2	1	1	0	1	68	35	37	41	20	0	0	35	1
0	0	0	1	0	0	M	53	27.64	0	140	0	1	0	53	95	65	12.01	315	1.21	71	3.4	16.7	2.92	79	1	1	4	2	0	1	0	0	2	0	1	0	0	66	35	35	43	19	0	0	57	0
0	0	0	1	1	0	M	66	25.97	0	120	5	0	0	87	140	90	6.36	100	0.534	240	4.87	72	1.74	79	1	1	4	1	0	0	0	0	2	0	1	0	1	68	38	32	45	21	0	0	44	0
0	0	0	1	0	1	M	62	22.22	2	146	5	0	0	56	120	80	11.59	134	6.87	220	4.58	87	2.47	79	0	1	4	1	0	0	0	0	1	0	0	0	1	68	30	35	46	18	0	0	44	0
0	0	0	1	0	0	M	67	19.49	1	133	5	0	0	86	130	80	7.51	290	0.211	190	6.27	137.4	3.04	79	1	1	4	1	0	0	0	0	1	1	1	0	1	58	35	35	47	19	0	0	45	0
0	0	0	1	0	0	M	51	23.42	0	120	5	0	0	85	108	70	8.55	238	4.9	1200	5.21	13.1	2.6	79	1	1	4	1	0	1	0	0	1	0	1	0	0	53	35	35	47	19	0	1	75	0
0	0	0	1	1	1	F	70	23.42	0	141	5	0	0	90	143	98	10.49	166	64	330	4.23	50.8	2.77	79	1	1	4	4	1	0	0	0	1	1	1	0	1	53	35	33	48	17	0	0
0	0	0	1	1	0	M	50	23.42	1	109	5	1	0	65	130	100	8.31	176	7.71	52	5.67	12.9	0.09	79	1	1	4	2	0	1	0	0	1	1	1	0	1	63	40	30	49	16	0	0	83	0
0	0	0	1	1	0	M	50	25.39	1	130	5	1	0	88	130	80	11.07	176	3.81	740	5.49	27.5	2.26	79	1	1	4	1	0	1	0	0	1	0	0	0	1	51	35	32	49	18	0	0	87	0
0	0	0	1	0	0	M	57	18.42	1	137	1	0	0	84	110	80	9.27	167	1.05	2082	17.86	42.4	1.37	79	1	1	4	2	1	0	0	0	1	0	0	0	1	51	32	31	49	18	0	0	101	0
0	0	0	1	1	0	M	62	20.2	1	97	5	0	0	91	120	75	5.63	135	1.09	2587	4.64	82	3.5	79	1	1	4	2	0	0	0	0	1	0	1	0	1	51	29	33	49	15	0	0
0	0	0	1	0	1	M	71	22.77	1	131	5	0	0	68	120	80	6.87	190	0.03	2972	4.87	32.6	2.95	79	1	1	4	1	0	1	0	0	2	1	0	0	1	51	38	34	49	19	0	0	77	0
0	0	0	1	0	0	M	45	21.97	1	152	6	0	0	68	145	90	10.7	224	0.634	14	5.27	108.1	2.77	79	1	1	4	1	0	1	0	0	1	0	1	0	1	66	45	38	50	18	0	0	72	0
0	0	0	1	1	1	M	68	25.95	1	152	5	0	0	86	130	80	8.34	271	3.5	1200	5.21	18.7	2.26	79	0	1	4	2	0	0	0	0	1	1	1	0	1	48	35	39	50	17	0	0	55	0
0	0	0	1	0	0	F	74	23.42	0	127	5	0	0	80	170	70	14.36	319	12	2977	5.11	23.8	1.97	79	1	1	5	2	0	1	0	0	2	2	1	0	1	50	38	37	55	20	0	0	57	0
0	0	0	1	1	1	M	51	23.42	2	141	1	0	0	98	130	80	15.92	216	3.14	1088	5.14	59.9	2.24	79	1	1	4	1	0	0	0	0	1	0	0	0	1	50	42	35	57	17	0	0	52	0
0	0	0	1	0	1	M	58	22.48	1	133	0	0	0	58	105	65	21.76	345	0.364	135	6.37	193.9	2.9	79.2	1	1	0	1	0	1	0	0	1	0	2	0	1	61	35	35	43	19	0	0	74	0
0	0	0	1	1	0	M	52	23.42	0	147	5	0	0	65	120	80	13.3	158	3.22	101	5.18	35.4	3.77	79.2	1	1	4	1	0	0	0	0	1	0	1	1	1	42	39	39	57	19	0	0
0	0	0	1	1	0	M	82	23.42	1	150	5	0	0	60	105	65	13.29	155	29	252	5.64	12.2	2.96	79.8	1	1	4	2	0	1	0	0	0	0	0	0	1	46	40	39	45	19	0	0	68	0
0	0	0	1	1	1	M	48	21.72	1	130	0	0	0	66	110	70	13.46	262	7.11	2587	4.68	56.2	4.05	80	1	1	4	1	0	0	0	0	0	0	0	0	1	60	38	39	41	20	0	0	69	0
0	0	0	1	0	0	M	55	19.81	1	156	4	0	0	58	130	90	4.89	148	0.161	100	12.92	17.3	3.64	80	1	1	4	1	0	0	0	0	1	0	1	0	1	57	32	35	42	19	0	0	46	0
0	0	0	1	1	0	M	47	24.8	0	135	5	0	0	80	141	75	10.67	194	0.077	2587	3.38	54.3	3.08	80	1	1	4	1	0	1	0	0	1	0	1	0	1	74	36	35	45	19	0	0	63	0
0	0	0	1	0	0	M	66	18.42	1	116	4	0	0	67	170	120	10.53	279	0.755	504	3.88	12.3	3.07	80	1	1	4	2	0	1	0	0	1	1	0	0	1	51	35	35	46	19	0	0	80	0
0	0	0	1	0	0	M	77	23.42	1	126	3	0	0	75	130	80	10.45	214	0.228	2982	8.39	10.59	2.93	80	1	1	4	1	0	0	0	0	1	1	1	0	1	42	42	35	46	19	0	0	74	0
0	0	0	1	0	1	F	62	22.03	0	133	5	0	0	78	150	80	14.8	140	1.58	2587	7.16	43	2.83	80	1	1	4	1	1	0	0	0	1	1	1	0	1	64	30	35	47	16	0	0	54	0
0	0	0	1	1	0	M	68	20.76	0	110	7	0	0	61	170	100	6.89	109	7.47	170	4.79	47.9	2.77	80	0	1	4	1	0	1	0	0	1	1	1	0	1	51	34	35	48	20	0	0	48	0
0	0	0	1	1	1	M	50	21.47	1	103	5	0	0	90	120	70	9.87	253	1.31	1500	18.97	33.5	2.26	80	0	1	4	2	0	1	1	1	1	1	1	0	1	51	30	36	49	18	0	0	48	0
0	0	0	1	0	1	M	60	25.08	2	162	5	0	0	83	160	95	13.8	118	0.006	1557	5.17	36.9	2.95	80	1	1	4	2	0	0	0	0	1	0	0	1	0	51	35	34	49	18	0	0	63	0
0	0	0	1	0	0	M	59	24.22	1	122	3	0	0	92	132	76	13.12	121	1.72	2587	4.08	41.6	3.57	80	1	1	4	1	0	1	0	0	1	0	0	0	1	51	35	35	49	19	0	0	92	0
0	0	0	1	0	1	M	61	20.7	1	157	0	0	0	78	150	90	11.87	136	0.016	5900	6.69	20.8	2.17	80	1	1	4	2	0	0	1	0	1	1	0	0	1	46	35	35	50	19	0	0	6	1
0	0	0	1	1	0	F	68	23.42	0	106	5	0	0	133	124	72	4.35	264	0.012	11000	24.68	10.4	3.4	80	0	1	4	4	1	0	0	0	1	1	1	0	1	40	35	35	53	19	0	0	9	1
0	0	0	1	1	1	F	79	23.42	0	135	3	0	0	105	160	90	6.04	143	21	28452	5.69	30	4.05	80	1	1	4	1	0	0	0	0	1	1	0	0	1	38	35	34	55	18	0	0	53	0
0	0	0	1	0	0	M	55	23.42	0	141	5	0	0	80	145	80	8.1	200	4.84	779	6.86	27.2	1.22	80.2	1	1	4	1	0	1	0	0	1	1	1	0	1	50	35	35	51	19	0	0	88	0
0	0	0	1	1	1	M	64	24.86	1	144	5	0	0	88	142	88	13.8	181	6.35	104	4.75	36.2	1.96	80.3	1	1	4	1	0	0	0	0	0	0	0	0	1	68	31	35	45	19	0	0	79	0
0	0	0	1	1	0	M	75	22.58	1	151	5	0	0	79	155	78	12.98	238	0.236	234	7.58	113.2	3.37	80.3	1	1	4	1	0	1	0	0	1	0	2	0	1	48	38	35	47	16	0	0	69	0
0	0	0	1	1	0	F	77	23.42	0	165	5	0	0	58	115	72	15.6	210	1.66	2587	5.33	43.6	2.09	80.3	0	1	4	1	0	1	0	0	1	0	0	0	1	51	35	38	49	20	0	0	55	0
0	0	0	1	1	1	F	64	23.42	0	141	3	0	0	90	130	70	11.32	217	0.003	278	16.45	20.6	2.32	80.6	1	1	4	1	1	0	0	0	1	0	1	0	0	60	33	30	44	19	0	0	86	0
0	0	0	1	0	1	M	54	27.73	1	136	7	0	0	65	160	100	8.8	154	1.18	227	18.6	25	1.19	80.7	1	1	4	1	1	1	0	0	1	0	1	0	1	59	35	35	44	19	0	0	89	0
0	0	0	1	1	0	F	70	24.44	0	140	5	0	0	75	150	80	11.07	168	0.359	6982	6.19	21.7	3.67	80.7	0	1	4	2	0	0	0	0	1	0	1	0	1	61	28	36	47	17	0	0	69	0
0	0	0	1	0	0	M	43	31.89	1	122	5	0	1	88	180	120	7.81	211	0.433	195	6.59	28.2	3.92	80.8	0	1	4	1	0	0	0	0	1	0	1	0	1	60	38	45	46	16	0	0	81	0
0	0	0	1	0	0	M	40	26.06	1	128	1	0	0	70	130	70	6.98	166	0.444	458	3.72	48.1	1.53	80.9	0	1	4	1	0	0	1	0	1	0	1	0	1	51	35	35	49	19	0	0	71	0
0	0	0	1	1	0	M	63	24.61	1	104	5	0	0	83	150	100	7.69	249	0.85	583	5.6	10.4	4.36	81	0	1	4	1	0	1	0	0	1	0	1	0	1	69	37	32	39	16	0	0	83	0
0	0	0	1	0	1	M	59	17.25	1	125	0	1	1	90	130	90	12.6	219	0.032	64	5.08	79.2	2.03	81	1	1	4	1	0	1	0	0	1	0	1	0	1	45	35	35	40	19	0	0	85	0
0	0	0	1	0	0	M	73	23.92	2	134	5	0	0	58	170	95	12.12	187	15	8	7.1	22.3	2	81	0	1	4	1	0	0	0	0	1	1	1	0	1	55	41	35	43	18	0	0	92	0
0	0	0	1	1	1	M	86	18.34	1	125	5	0	0	52	178	73	10.82	184	38	1701	3	39.3	2.24	81	1	1	4	2	0	1	0	0	1	1	1	0	1	62	35	36	44	18	0	0	63	0
0	0	0	1	1	0	M	46	23.42	1	121	5	0	1	128	150	90	9.74	93	3.69	2587	4.91	41.6	2.72	81	1	1	4	1	0	1	0	0	1	0	1	0	1	45	34	31	45	20	0	0	62	0
0	0	0	1	0	0	M	64	25.1	1	126	0	0	0	74	130	80	4.66	167	0.963	2606	5.47	23.8	2.24	81	1	1	4	2	0	0	0	0	1	1	1	0	0	51	31	36	45	20	0	0	70	0
0	0	0	1	1	0	M	36	20.07	1	131	5	0	0	72	138	97	5.25	200	0.393	109	4.06	30.9	2.11	81	0	1	4	1	0	0	0	0	1	0	1	0	1	73	41	37	47	16	0	0	50	0
0	0	0	1	1	1	M	56	19.83	1	141	0	0	0	75	130	80	7.74	254	0.008	450	4.8	27.3	2.44	81	1	1	4	1	0	1	1	0	0	1	0	0	1	51	33	32	47	16	0	0	92	0
0	0	0	1	0	1	M	63	23.42	1	129	0	0	0	45	101	70	15.84	210	0.314	219	7.47	29.7	2.91	81	0	1	4	1	0	0	0	0	2	1	1	0	1	50	36	38	48	20	0	0	62	0
0	0	0	1	0	0	F	60	23.42	0	101	5	0	1	85	130	80	6.95	137	2.28	830	8.61	145.1	3.14	81	1	1	4	1	0	0	0	0	1	1	2	0	1	45	41	55	48	23	0	0	45	0
0	0	0	1	1	0	M	80	23.42	0	118	5	1	0	80	120	70	7.71	139	10	641	5.11	44.2	3.57	81	0	1	4	4	0	1	1	0	1	0	2	0	1	20	35	35	49	19	0	0	1	1
0	0	0	1	0	0	F	82	19.63	0	121	5	0	0	87	132	76	11.24	276	3.01	3093	5.16	41.6	3.63	81	0	1	4	2	0	0	1	0	1	1	0	0	1	55	30	35	49	17	0	0	30	1
0	0	0	1	0	0	F	76	23.42	0	136	0	0	0	64	96	60	8.89	191	1.81	3922	4.79	23.2	2.88	81	1	1	4	1	0	1	0	0	0	1	1	1	0	49	39	36	49	16	0	0	58	0
0	0	0	1	0	0	M	52	22.49	1	133	3	0	0	88	135	90	13.62	225	1.62	1118	7.01	18.6	2.39	81	1	1	4	2	0	0	0	0	1	1	1	0	1	45	35	35	50	19	0	0	55	0
0	0	0	1	1	0	M	57	29.03	0	151	5	0	0	78	186	92	11.46	234	0.178	492	5.24	54	3.25	81	1	1	4	2	0	0	0	0	0	0	1	0	1	57	31	32	51	20	0	0	99	0
0	0	0	1	0	0	F	67	22.67	1	121	4	1	0	120	165	117	14.85	185	4.46	7453	5.85	35.8	3.01	81	0	1	4	2	0	1	0	0	2	1	0	0	1	33	45	28	55	17	0	1	75	0
0	0	0	1	0	1	M	68	18.07	1	140	5	0	0	62	170	90	10.64	116	10	346	4.41	41.6	1.14	81	1	1	4	4	0	1	0	0	1	1	1	0	1	42	36	37	63	18	0	0	60	0
0	0	0	1	0	1	M	77	23.18	1	143	5	1	0	79	177	91	7.53	165	11	275	7.32	18.07	2.59	81.1	1	1	4	2	0	1	0	0	1	0	1	0	1	62	29	34	48	20	0	0	68	1
0	0	0	1	1	1	M	79	27.25	1	148	5	0	0	62	143	89	11	221	0.615	3225	7.32	50.6	2.42	81.7	1	1	4	1	0	1	1	0	1	1	1	0	1	48	38	39	50	20	0	0
0	0	0	1	1	1	M	78	20.96	1	78	7	0	0	100	136	90	8.6	183	0.989	17927	5.14	37.8	3.03	81.7	0	1	4	2	0	1	0	0	1	1	1	0	1	34	35	35	70	19	0	0	71	0
0	0	0	1	0	0	M	72	23.42	2	120	0	0	0	69	156	97	10.85	191	0.379	351	10.72	44.2	1.74	82	1	1	4	2	1	0	0	0	2	1	2	0	0	28	38	29	34	17	0	0
0	0	0	1	1	1	F	82	19.72	0	143	5	0	0	74	156	80	6.8	163	12	1400	7.64	104.1	3.84	82	0	1	5	1	0	0	0	0	1	1	0	0	1	64	36	38	37	18	0	0	44	0
0	0	0	1	0	0	M	52	24.22	0	131	7	0	0	77	190	100	11.47	126	0.216	141	5.82	78	3.31	82	0	1	4	1	0	1	0	0	2	1	3	1	1	61	40	54	39	28	0	0	70	0
0	0	0	1	0	0	M	42	23.42	1	108	5	0	0	90	120	85	9.26	172	0.056	100	5.93	42.8	3.98	82	1	1	4	2	0	1	0	0	1	0	1	0	1	42	35	35	42	19	0	0	49	0
0	0	0	1	1	1	M	59	23.42	1	124	5	0	0	80	95	60	10.63	180	1.94	2337	4.93	41.6	3.23	82	1	1	4	2	0	0	0	0	0	0	0	0	1	50	27	31	43	17	0	0	62	0
0	0	0	1	0	1	F	70	28.3	0	137	5	0	0	62	124	72	8.62	170	0.094	521	7.6	66.1	4	82	1	1	4	1	0	0	0	0	2	1	1	0	1	40	39	35	46	19	0	0	49	0
0	0	0	1	1	0	M	75	25.39	0	151	5	0	0	65	145	74	3.99	208	0.5	420	5.05	18.6	3.55	82	1	1	4	2	0	1	0	0	0	1	0	0	1	61	29	28	48	11	0	0	47	0
0	0	0	1	1	0	M	55	26.64	0	141	5	0	0	70	125	75	10.6	218	4	528	5.14	60.2	3.68	82	0	1	4	1	0	1	0	0	1	0	1	0	1	67	32	30	48	18	0	0	76	0
0	0	0	1	0	1	M	76	23.42	0	119	7	0	0	92	135	80	8.05	215	12	170	5.12	41.6	2.82	82	0	1	4	1	0	1	0	0	0	0	1	0	1	62	37	42	49	20	0	0	63	1
0	0	0	1	1	1	M	49	29.98	1	152	5	0	0	78	120	60	10.45	246	0.033	250	4.61	88.9	2.52	82	1	1	4	1	0	1	0	0	1	0	0	0	1	51	27	37	49	17	0	0	45	0
0	0	0	1	1	1	M	74	23.42	0	145	5	0	0	75	115	70	15.56	246	0.261	2466	6.11	41.6	1.74	82	0	1	4	2	0	1	0	0	0	0	0	0	1	58	32	32	52	18	0	0	1	1
0	0	0	1	1	1	F	69	21.23	0	109	5	0	0	83	130	90	8.79	132	14	1795	4.74	49.8	2.53	82	0	1	4	1	0	1	0	0	0	0	1	0	1	45	39	31	53	17	0	0	57	1
0	0	0	1	0	0	F	66	23.42	0	125	5	0	0	112	115	80	12.82	100	6.18	7773	6.98	46.3	2.64	82	1	1	4	2	1	0	0	0	2	0	1	0	1	38	43	43	53	20	0	0	54	0
0	0	0	1	1	0	M	47	23.42	1	117	5	0	0	70	120	70	7.23	153	5.19	2587	4.33	302.9	2.77	82	1	1	4	1	0	0	0	0	2	1	1	0	1	44	46	41	54	24	0	0	71	0
0	0	0	1	0	0	M	61	23.78	1	140	5	0	0	75	130	70	4.99	95	2.38	424	8.22	26.7	3.38	82	0	1	4	1	1	0	0	0	2	1	1	0	1	37	40	37	56	18	0	0	82	0
0	0	0	1	1	0	M	64	22.95	1	136	5	0	0	80	110	60	4.56	126	0.023	708	7.07	11.4	3.64	82	1	1	4	1	1	1	0	0	2	0	2	0	1	27	40	32	56	18	0	0
0	0	0	1	1	0	F	60	26.14	0	105	5	0	0	88	138	91	7.73	130	0.382	7711	8.95	17.5	2.94	82	1	1	4	2	1	1	0	0	1	1	2	0	1	39	37	38	56	18	0	0	67	0
0	0	0	1	1	1	M	52	30.49	1	132	5	0	0	100	125	80	11.65	232	30	2338	6.86	31.6	3.25	82	0	1	4	2	0	0	0	0	0	1	1	0	1	33	38	34	72	20	0	0	60	1
0	0	0	1	1	0	M	51	27.92	1	141	5	0	0	74	140	100	9.34	208	3.247	23	10.29	23	0.86	83	1	1	5	1	0	1	0	0	1	0	0	0	0	64	33	30	44	29	0	0	85	0
0	0	0	1	0	1	M	60	25.71	0	133	0	1	0	58	110	60	9.11	159	0.302	51	4.54	118.2	2.57	83	0	1	4	1	0	1	0	0	2	1	1	0	1	65	38	33	45	18	0	0	64	0
0	0	0	1	0	1	F	76	22.43	0	161	5	0	0	82	130	71	17.12	194	0.074	7800	6.95	58.3	2.06	83	1	1	4	1	0	1	0	0	0	1	0	0	1	40	41	38	45	19	0	0	55	0
0	0	0	1	1	0	M	33	36.49	1	118	0	0	1	73	175	118	9.83	161	0.229	34	6.52	19.6	2.91	83	1	1	4	1	0	1	0	0	2	0	1	0	0	61	35	32	47	16	0	0	44	0
0	0	0	1	0	0	M	72	34.05	1	127	5	0	0	69	120	60	6.79	187	1.1	898	5.27	5.9	1.7	83	1	1	4	2	0	1	0	0	1	0	0	0	1	51	38	36	49	20	0	0	66	0
0	0	0	1	0	1	M	65	23.42	1	145	5	1	0	63	135	85	7.6	202	0.123	1100	4.41	33.6	3.32	83	0	1	4	1	0	0	0	0	1	0	1	0	1	51	36	36	49	19	0	0	49	0
0	0	0	1	0	1	F	70	23.33	0	136	5	0	0	80	130	80	7.54	140	11	1569	6.63	15	3.39	83	0	1	4	1	0	0	0	0	1	0	1	0	1	51	36	40	49	20	0	0	56	0
0	0	0	1	1	0	M	57	30.06	0	140	5	0	0	103	124	82	12.76	237	0.249	2100	6.75	13.7	3.83	83	1	1	4	1	0	1	0	0	1	1	1	0	1	60	35	35	49	19	0	0	44	0
0	0	0	1	0	0	M	65	23.42	1	150	5	0	0	65	110	78	15.06	205	0.063	80	4.19	43.2	2.27	83	1	1	4	1	0	1	0	0	0	1	0	0	1	60	29	29	50	16	0	0	60	0
0	0	0	1	0	0	M	54	23.42	1	112	0	0	0	73	160	101	4.88	218	3.25	169	5.58	53.1	3.18	83	0	1	4	2	0	0	0	0	2	0	1	0	1	56	35	33	50	19	0	0	1	1
0	0	0	1	0	1	M	46	24.57	0	159	3	0	0	96	120	80	13.56	238	0.076	1750	6.08	38	2.04	83	0	1	4	2	0	1	0	0	0	0	0	0	1	64	36	31	50	20	0	0	44	0
0	0	0	1	0	0	F	81	24.44	0	141	5	0	0	65	180	100	10.06	192	2.1	15787	4.3	79.9	1.81	83	0	1	4	2	0	1	0	0	0	0	1	0	1	64	25	32	50	19	0	0	57	1
0	0	0	1	1	0	M	50	26.47	0	136	5	0	0	110	140	90	10.33	175	0.729	656	15.79	28.4	4.03	83	1	1	4	1	1	0	1	0	1	0	1	0	1	38	25	31	52	16	0	0	54	0
0	0	0	1	1	1	M	54	24.39	1	135	5	0	0	80	125	76	8.58	157	0.028	100	5.71	50.8	3.33	83	1	1	4	1	0	0	0	0	1	1	1	0	1	52	35	31	55	18	0	0	47	0
0	0	0	1	1	1	M	80	17.96	0	136	1	1	0	58	126	72	30.25	290	9.4	1906	5.16	20	2.75	83	1	1	4	1	0	1	0	0	1	1	2	0	1	51	34	33	57	19	0	0	48	0
0	0	0	1	1	0	M	60	23.31	2	160	5	0	0	109	142	95	9.34	185	18	4600	5.66	13.25	4.19	83	1	1	4	3	0	1	0	0	1	0	2	0	1	30	32	34	67	21	0	0	44	0
0	0	0	1	0	0	M	47	23.42	0	125	1	0	0	68	150	110	10.07	146	1.67	10	4.97	41.6	2.09	83.5	1	1	4	1	0	1	0	0	0	0	1	0	1	50	31	33	49	20	0	0	87	0
0	0	0	1	0	1	M	60	23.42	1	172	5	0	0	85	130	100	7.79	221	0.036	55	6.25	139.4	2.53	83.8	1	1	4	1	0	1	0	0	1	1	1	0	1	48	39	33	56	20	0	0	68	0
0	0	0	1	0	0	M	63	23.42	0	126	7	0	0	75	195	100	11.26	314	0.267	2587	13.21	50.2	3.11	84	0	1	4	1	0	1	0	0	1	0	0	0	1	57	35	35	36	19	0	0	56	0
0	0	0	1	1	0	M	45	24.22	0	127	1	1	0	71	126	86	7.88	262	0.543	100	5.08	22.1	6.29	84	1	1	4	1	0	1	0	0	1	0	1	0	1	50	35	35	41	19	0	1	45	0
0	0	0	1	0	1	M	62	27.34	1	146	5	0	0	78	170	82	8.73	264	0.036	254	4.57	13.8	2.88	84	1	1	4	1	0	0	0	0	0	0	0	0	1	70	27	31	41	19	0	0	103	0
0	0	0	1	1	1	M	55	26.17	1	112	5	0	0	58	85	60	9.94	148	0.027	43	6.8	31.9	3.45	84	1	1	4	2	0	1	1	0	1	1	2	0	1	52	33	35	45	19	0	0	93	0
0	0	0	1	0	0	M	51	22.49	1	103	5	0	0	103	120	75	8.89	171	3.01	37	5.27	22.4	3.88	84	1	1	4	1	0	1	0	0	1	1	1	0	1	57	41	33	46	20	0	0	53	0
0	0	0	1	0	0	M	62	23.88	1	141	0	0	0	70	150	80	17.23	154	0.426	184	4.03	69.4	3.98	84	1	1	4	2	0	1	0	0	1	0	1	0	1	50	33	34	47	18	0	0	72	0
0	0	0	1	0	0	M	74	26.37	1	144	5	0	1	80	160	70	11.87	210	9.75	112	6.55	26.6	1.31	84	1	1	4	1	0	1	0	0	1	0	1	0	1	62	42	37	48	20	0	0	54	0
0	0	0	1	1	0	F	70	23.42	0	125	5	0	0	95	128	75	14.6	153	5.99	4377	9.36	59.8	2.14	84	1	1	4	2	0	0	1	0	0	0	1	0	1	40	33	37	48	21	0	0	50	1
0	0	0	1	1	0	M	58	19.84	1	121	5	1	0	70	140	90	10.73	217	0.679	97	4.23	37.2	1.34	84	1	1	4	1	0	0	0	0	0	1	1	0	1	62	31	33	49	16	0	1	61	1
0	0	0	1	1	1	M	69	22.41	0	121	5	0	0	59	145	80	8.84	187	9.78	146	8.67	41.6	3.42	84	1	1	4	1	0	0	0	1	1	0	1	0	1	51	29	32	49	16	0	0	1	1
0	0	0	1	1	1	M	53	26.26	1	145	5	0	0	83	120	70	9.78	226	2.13	2587	6.42	41.9	4.53	84	1	1	4	1	1	0	0	0	1	0	1	0	1	65	29	28	49	18	0	0	81	0
0	0	0	1	0	1	M	76	22.1	0	104	5	0	0	80	130	70	7.3	151	0.071	2603	7.49	36	1.65	84	1	1	1	1	0	1	0	0	1	1	1	0	1	74	33	34	49	12	0	0	99	0
0	0	0	1	0	1	F	70	14.34	1	93	4	0	0	90	143	87	11.73	254	10	12723	5.39	65.7	1.59	84	0	1	4	3	0	1	1	0	2	0	2	0	0	51	27	37	49	20	0	0
0	0	0	1	0	0	M	58	24.82	1	134	5	0	0	72	124	70	13.19	186	3.53	33	5.05	28.1	3.09	84	0	1	4	1	0	1	0	0	1	0	0	0	1	72	33	33	50	18	0	0	70	0
0	0	0	1	1	1	M	63	23.42	2	157	5	0	0	63	125	75	15.33	202	5.9	394	6.31	93.8	3.6	84	1	1	4	2	0	1	0	0	1	1	0	0	1	48	34	36	55	17	0	0	53	0
0	0	0	1	1	0	M	74	21.34	0	124	5	0	0	102	100	70	15.43	273	2.2	3575	5.69	76	2.3	84	1	1	4	3	0	0	0	0	0	0	0	0	1	57	35	33	56	17	0	0	61	0
0	0	0	1	1	0	F	71	24.75	0	116	6	0	0	70	85	50	13.94	833	0.017	9712	4.93	38	2.61	84	0	1	4	2	0	1	0	0	0	1	1	0	1	40	35	35	56	19	0	0	67	0
0	0	0	1	1	0	M	50	23.83	1	96	5	0	0	80	95	68	6.16	216	3.12	36	8.11	16.2	2.64	84.3	0	1	4	3	0	1	0	0	1	1	2	0	1	30	38	43	49	19	0	0	70	1
0	0	0	1	0	1	M	77	26.06	1	158	0	0	1	90	150	80	11.49	235	4.9	5123	4.45	19.3	2.7	84.6	0	1	4	1	0	1	0	0	1	1	0	0	1	51	35	35	49	19	0	0	55	0
0	0	0	1	1	0	F	72	22.81	0	147	5	0	0	63	160	100	12.2	108	0.868	2587	6.86	30	2	84.6	1	1	4	2	0	1	0	0	1	1	0	0	0	47	32	35	50	19	0	0	55	0
0	0	0	1	1	0	M	65	20.86	1	161	5	0	0	70	160	80	9.4	182	5.61	1528	5.3	52	2.77	84.6	0	1	4	1	0	0	0	0	0	0	1	0	1	58	30	34	51	18	0	0	91	0
0	0	0	1	0	0	M	65	23.42	1	107	0	0	0	85	120	70	16.01	136	3.25	2587	6.86	41.6	3.76	84.6	1	1	0	1	0	0	0	0	1	1	2	0	1	40	35	42	52	19	0	0	54	0
0	0	0	1	0	0	M	44	25.56	1	157	7	0	0	80	160	110	7.38	150	0.101	2587	6.86	27.3	3.86	84.6	1	1	4	1	0	1	0	0	1	1	1	0	1	48	35	35	55	19	0	0	54	0
0	0	0	1	1	0	F	66	20.82	0	134	0	0	0	100	130	90	17.11	205	27	8134	8.93	57.2	3.49	84.9	0	1	7	2	1	1	0	0	0	0	1	0	1	51	35	34	49	18	0	0	67	0
0	0	0	1	1	1	F	80	23.42	2	135	5	0	1	87	112	74	6.76	197	3.93	4800	5.9	19.2	3.68	85	0	1	4	1	1	1	0	0	2	1	2	0	0	58	44	51	42	16	0	0	45	0
0	0	0	1	1	1	M	68	23.42	1	110	1	0	0	52	110	70	9.59	147	0.095	2587	10.37	25.6	2.44	85	1	1	0	1	0	1	0	0	0	0	1	0	1	57	36	32	43	16	0	0	57	0
0	0	0	1	0	1	M	59	24.22	1	121	0	0	0	87	140	70	11.46	201	0.097	125	8.07	78.4	3.38	85	1	1	4	2	1	1	1	0	1	0	1	1	1	31	44	39	44	20	0	0	103	0
0	0	0	1	0	0	F	77	23.42	0	134	1	0	1	51	90	60	12.86	191	5.31	4100	8.93	25.4	4.24	85	1	1	4	4	1	1	0	0	2	1	1	0	1	60	42	36	44	20	0	0	46	0
0	0	0	1	0	0	M	39	22.72	1	118	6	0	0	72	175	120	9.11	200	0.833	124	6.06	17	3.25	85	0	1	4	1	0	1	0	0	1	0	0	0	1	56	35	35	46	19	0	0	69	0
0	0	0	1	0	1	M	72	23.42	1	138	3	0	0	60	125	80	12.12	288	0.005	405	5.57	16.7	1.71	85	1	1	7	2	0	0	0	0	1	0	1	0	1	40	28	33	46	20	0	0	77	0
0	0	0	1	0	0	M	67	23.42	0	131	0	0	1	85	120	72	8.43	203	0.287	88	17.48	25.1	4.47	85	1	1	4	1	1	0	0	0	2	1	1	0	1	67	37	46	47	20	0	0	54	0
0	0	0	1	1	0	M	46	23.05	1	106	0	1	0	72	90	65	8.87	144	1.69	16	14.33	18.7	3.89	85	1	1	4	1	0	0	0	0	1	0	1	0	1	62	36	36	48	18	0	1	55	0
0	0	0	1	0	0	M	41	25.55	1	114	0	0	1	59	95	60	11.64	143	0.255	408	6.01	267.8	2.84	85	1	1	4	1	0	1	0	0	1	0	1	0	1	47	38	40	48	21	0	0	55	0
0	0	0	1	1	1	M	54	27.92	1	134	5	0	0	82	115	75	9.84	156	0.801	2587	5.39	25.2	2.29	85	1	1	4	1	0	1	0	0	1	0	1	0	1	52	37	35	48	19	0	0	49	0
0	0	0	1	1	1	M	64	20.9	1	120	7	0	0	67	126	95	8	226	10	199	11.7	64.2	2.4	85	1	1	4	1	0	0	0	0	1	0	1	0	1	51	25	27	49	16	0	0	58	0
0	0	0	1	0	1	M	88	19.88	0	121	1	0	0	80	180	100	10	290	7.2	762	8.4	28.7	3.78	85	1	1	5	3	0	0	0	0	0	1	1	0	1	43	35	31	49	17	0	0	55	0
0	0	0	1	1	1	F	83	23.42	0	131	5	0	0	90	220	116	11.98	176	6.71	3600	10.24	41.6	4.2	85	0	1	4	1	0	0	1	0	0	0	1	0	1	42	30	28	50	20	0	0	6	1
0	0	0	1	1	0	M	60	24.22	1	118	5	1	0	68	165	115	8.76	146	0.821	1545	5.14	17.6	1.95	85	0	1	4	2	0	1	0	0	0	0	0	0	1	61	27	33	52	17	0	1	85	0
0	0	0	1	1	0	M	44	26.12	1	130	5	0	0	75	120	85	9.96	195	4.9	8	8.36	41.6	3.49	85	1	1	4	1	0	1	0	0	1	0	0	0	1	46	35	35	53	19	0	0	55	0
0	0	0	1	1	1	M	69	23.42	1	136	5	0	0	98	165	80	18.88	311	10	3033	4.76	122.8	2	85	0	1	4	2	0	0	0	0	1	0	1	0	1	51	35	35	53	19	0	0	87	0
0	0	0	1	0	0	M	79	23.42	0	118	7	0	0	82	120	80	7.63	190	2.98	2816	9.72	11.7	1.91	85	0	1	4	4	1	1	0	1	0	1	0	0	1	37	27	29	59	16	1	0	1	1
0	0	0	1	1	0	M	46	21.26	1	119	1	0	1	76	160	110	15.93	255	0.689	83	4.22	23.2	3.89	85.3	1	1	4	2	0	1	0	0	1	1	1	0	1	42	35	35	48	19	0	0	86	0
0	0	0	1	1	0	M	57	24.49	1	135	7	0	0	98	145	100	5.8	249	0.027	39	19.91	16.4	0.86	85.3	1	1	4	1	0	1	0	0	0	0	1	0	1	43	35	29	49	16	0	0	87	0
0	0	0	1	0	0	M	60	23.42	1	113	0	1	0	72	175	95	9.06	233	7.65	302	6.73	53.5	3.36	85.6	1	1	4	1	0	1	0	0	1	0	2	0	0	48	32	40	45	18	0	0	67	0
0	0	0	1	0	0	M	78	21.26	0	147	5	0	0	71	138	76	12.82	555	0.542	2587	2.19	40.7	1.67	85.7	1	1	4	4	1	0	0	0	1	1	0	0	1	45	28	34	43	20	0	0	54	0
0	0	0	1	0	0	M	57	28.37	2	118	5	0	0	85	130	74	3.31	186	1.18	25	5.53	41.6	3.51	85.8	0	1	4	1	0	1	0	0	0	1	0	0	1	50	35	35	46	19	0	0	87	0
0	0	0	1	0	0	M	79	25.51	1	114	5	1	0	80	108	70	7.68	150	1.05	195	6.86	8.47	3.44	85.9	0	1	4	1	0	1	0	0	1	1	1	0	1	20	27	35	71	20	0	0	73	0
0	0	0	1	0	0	M	78	23.42	1	124	3	0	0	93	180	100	10.89	125	2.44	4095	13.28	41.6	2.74	86	1	1	4	3	0	0	0	0	1	0	1	0	1	50	36	34	45	19	0	0	56	0
0	0	0	1	0	1	M	50	21.77	1	150	3	1	0	32	60	42	13.93	203	0.053	2587	4.51	18.3	2.79	86	1	1	4	4	0	1	0	0	1	0	0	0	1	60	28	33	46	16	0	0	69	0
0	0	0	1	0	0	F	77	23.42	0	128	7	0	1	62	126	68	7.72	242	0.5	10509	12.23	23.2	3.31	86	0	1	5	2	0	1	0	0	1	0	1	0	1	46	28	34	46	16	0	0	1	1
0	0	0	1	0	1	M	45	24.46	0	119	5	0	0	68	140	90	6.62	202	0.282	1178	5.03	13.9	2.63	86	1	1	4	2	0	0	0	0	2	0	1	0	1	60	35	35	47	19	0	0	71	0
0	0	0	1	1	0	F	48	21.37	0	150	5	0	0	85	116	78	8.14	216	0.049	1448	4.2	21.6	1.63	86	0	1	4	1	0	0	0	0	1	0	1	0	1	67	33	38	47	19	0	0	53	0
0	0	0	1	1	0	M	48	26.83	1	122	5	0	0	80	164	115	14.45	255	0.191	2587	3.97	34.9	1.98	86	1	1	4	1	1	0	0	0	1	0	1	0	1	46	34	30	48	16	0	0	64	0
0	0	0	1	0	0	F	53	23.42	0	115	5	0	0	105	150	110	5.73	186	1.24	5340	5.74	16.14	3.12	86	1	1	2	3	0	0	0	1	1	0	0	0	1	51	38	38	49	17	0	0	1	1
0	0	0	1	1	0	F	86	23.42	0	108	5	0	0	99	167	110	13.44	412	13	35000	9.49	24.2	2.09	86	0	1	4	4	0	1	1	0	2	0	2	0	1	51	40	35	49	20	0	0	80	0
0	0	0	1	1	0	F	83	23.42	0	123	1	0	1	70	80	60	8.46	113	1.74	2341	6.14	55.9	1.59	86	1	1	4	4	0	0	1	1	1	1	1	0	1	26	35	35	56	19	0	0	44	1
0	0	0	1	1	0	M	45	27.28	0	128	5	0	0	92	120	100	10.03	202	10	68	4.52	102.4	4.83	86.1	0	1	4	1	0	1	0	0	1	0	2	0	1	60	32	38	43	16	0	0	74	0
0	0	0	1	0	1	M	71	24.68	0	148	5	1	0	78	120	70	10.26	210	0.04	1290	5.71	35.8	1.36	86.4	1	1	4	1	0	0	0	0	1	0	0	0	1	50	35	35	57	19	0	0	65	0
0	0	0	1	1	0	M	70	20.94	1	137	5	0	0	68	150	70	7.82	171	3.17	613	5.38	41.6	1.69	86.5	1	1	4	1	0	1	0	0	0	1	1	0	1	63	35	35	58	19	0	0	65	0
0	0	0	1	0	0	M	76	18.1	1	100	1	0	0	77	128	68	11	219	1.37	65	6.95	41.6	3.28	86.7	1	1	5	1	0	0	0	0	0	0	1	0	1	38	35	35	45	22	0	0	87	0
0	0	0	1	0	1	F	67	23.42	1	119	5	1	0	68	124	76	12.78	191	64	586	10.65	41.6	2.85	86.7	1	1	4	3	0	1	0	0	2	0	1	0	1	32	38	40	52	23	0	0	91	0
0	0	0	1	0	0	M	50	19.84	1	143	5	0	0	50	95	60	12.18	241	10	122	6.21	41.4	3.9	86.9	1	1	4	1	0	1	0	0	1	0	1	0	1	59	36	32	49	20	0	0	84	0
0	0	0	1	1	0	M	39	24.91	1	142	2	0	0	76	130	90	6.12	374	0.125	1055	22.05	21.7	2.77	87	1	1	2	1	0	0	0	0	1	0	0	0	1	62	35	35	47	19	0	0	75	0
0	0	0	1	0	0	M	74	23.42	0	131	5	0	0	85	100	60	12.36	239	1.64	180	5.54	75.4	2.88	87	1	1	4	2	0	1	1	0	1	1	1	0	1	46	34	31	50	19	0	0	54	0
0	0	0	1	1	0	F	76	26.04	0	140	5	0	0	100	155	105	15.14	169	10	19264	6.17	47.8	2.56	87	0	1	4	1	0	0	0	0	1	0	1	0	1	35	26	34	52	20	0	0	74	0
0	0	0	1	1	0	M	59	23.42	1	112	5	0	0	110	113	53	19.29	143	6.76	3630	4.55	41.6	2.64	87	0	1	4	3	0	0	0	1	2	1	2	0	1	48	35	36	65	18	0	0	1	1
0	0	0	1	1	0	M	71	27.47	1	127	5	0	0	60	90	60	8.4	148	3.69	100	7.01	41.6	2.61	87.8	1	1	4	1	0	0	0	0	1	0	1	0	1	61	30	31	49	17	0	0	52	0
0	0	0	1	0	1	M	57	24.38	0	127	0	0	0	94	141	81	13.2	173	10	557	5.47	102.4	2.74	88	1	1	4	1	1	1	0	0	1	0	1	0	1	60	35	35	44	19	0	0	57	0
0	0	0	1	0	0	M	36	29.03	0	140	0	0	0	90	120	80	5.49	229	0.5	5	4.61	43.7	2.44	88	1	1	5	1	0	1	0	0	1	0	1	0	1	66	34	37	48	20	0	0	72	0
0	0	0	1	1	0	M	49	24.22	1	158	5	0	0	87	110	70	7.46	287	0.469	962	5	69.3	2.88	88	1	1	4	2	0	0	0	0	0	0	1	0	1	57	31	30	48	18	0	0	92	0
0	0	0	1	1	1	M	83	20.22	0	132	5	0	1	94	122	87	8.15	146	40	1604	3.66	48.8	1.68	88	1	1	5	2	0	0	0	0	1	0	1	0	1	56	32	37	48	16	0	0	60	0
0	0	0	1	0	0	M	49	22.49	1	142	5	0	0	80	140	80	6.31	203	0.12	33	5.95	17.1	3.45	88	1	1	4	1	0	1	0	0	1	0	1	0	1	42	36	35	55	18	0	0	53	0
0	0	0	1	0	1	F	82	20.81	1	142	1	0	0	77	220	100	16.77	261	25	405	4.08	58.6	4.37	88.7	1	1	4	2	0	0	0	0	2	0	1	0	0	72	27	32	43	20	0	0	72	0
0	0	0	1	1	0	M	58	21.26	1	153	5	0	0	80	134	96	10.47	168	10	48	6.22	41.6	2.87	88.8	0	1	4	1	0	0	0	0	0	0	1	0	1	51	36	26	49	18	0	0	92	0
0	0	0	1	0	0	M	68	23.42	1	136	3	0	0	76	160	106	8.09	135	10	471	7.02	63.9	3.06	88.8	1	1	4	1	0	1	0	0	0	1	2	0	1	58	35	32	55	21	0	0	73	0
0	0	0	1	1	0	M	73	25.01	1	99	5	0	0	100	145	86	8.25	248	64	6315	9.83	33.8	2.46	89	1	1	5	2	0	0	0	0	1	1	1	0	1	54	38	32	45	19	0	0	76	1
0	0	0	1	0	0	F	76	23.42	0	140	5	0	0	56	122	85	9.89	210	0.081	59	14.63	21.4	1.73	89	1	1	4	1	1	1	0	0	1	1	0	0	1	58	33	35	46	18	0	0
0	0	0	1	0	1	M	63	21.19	1	115	5	0	0	78	185	107	9.26	183	3.13	970	5.73	27.6	2.48	89	1	1	4	2	0	1	1	0	1	1	0	0	1	57	30	32	46	17	0	0	49	0
0	0	0	1	1	1	M	72	23.42	1	136	7	0	0	52	84	55	10.49	181	0.898	261	4.16	26.6	2.28	89	1	1	4	4	0	1	0	0	1	1	1	0	1	52	37	38	47	16	0	0	61	0
0	0	0	1	0	1	M	69	23.94	0	107	0	0	0	85	135	85	14.47	179	9.95	2066	6.54	111.7	3.02	89	0	1	4	3	1	0	0	0	2	0	2	0	1	39	36	33	48	18	0	0	55	0
0	0	0	1	0	0	M	61	25.71	1	79	5	0	0	60	200	100	11.35	168	3.37	88	5.09	41.6	2.25	89	1	1	4	1	0	1	0	0	1	0	1	0	1	51	45	34	49	20	0	0	71	1
0	0	0	1	1	1	M	71	24.84	2	121	4	0	0	80	120	75	4.35	109	3.23	690	5.25	20.5	2.35	89	1	1	4	2	0	1	1	0	1	0	1	0	1	64	40	30	49	19	0	0	69	0
0	0	0	1	0	0	M	82	23.42	1	139	1	0	0	70	155	75	9.53	139	16	880	5.78	64.9	2.63	89	1	1	7	1	0	0	0	0	1	1	1	0	1	44	35	33	56	18	0	0	48	0
0	0	0	1	1	0	M	76	23.53	1	108	5	0	0	60	110	70	6.91	168	2.72	2010	7.17	52.7	2.61	89	1	1	4	2	0	0	1	0	1	1	1	0	1	38	33	30	57	16	0	0	53	0
0	0	0	1	1	0	M	57	23.74	1	122	5	0	0	106	135	90	13.07	205	0.947	1844	4.67	24.1	2.25	89.3	1	1	4	2	0	1	0	0	0	1	1	0	1	35	24	26	49	19	0	0	84	0
0	0	0	1	0	0	M	86	23.42	0	117	7	1	0	70	190	100	5.19	186	12	899	7.56	15.3	2.6	89.8	0	1	5	2	0	1	1	0	0	0	0	0	1	51	37	36	49	18	0	0	44	1
0	0	0	1	0	0	M	70	19.47	1	115	3	0	0	102	130	80	9.5	255	2.42	1831	6.86	182.3	2.77	90	1	1	4	1	0	0	0	0	0	0	1	0	1	55	34	36	42	18	0	0	76	0
0	0	0	1	1	1	M	55	23.88	0	137	7	0	0	55	108	85	11.22	246	0.072	6	4.79	141.9	1.88	90	1	1	4	1	0	1	0	0	1	0	1	0	1	70	35	35	43	19	0	0	65	1
0	0	0	1	0	0	M	72	21.48	0	116	4	0	0	73	120	80	8	124	0.914	866	4.57	17.3	3.09	90	1	1	4	1	0	1	1	0	1	0	1	0	1	64	34	30	45	16	0	0	49	0
0	0	0	1	1	0	M	58	26.57	1	125	7	0	0	55	120	80	9.68	212	2.76	1438	8.25	19	2.18	90	1	1	4	1	0	1	0	0	1	1	1	0	1	56	34	30	47	16	0	0	54	0
0	0	0	1	0	0	M	82	23.42	1	113	1	0	0	75	155	90	9.03	260	18	459	9.83	34.7	3.23	90	1	1	5	1	1	1	0	0	1	0	1	0	1	40	35	34	48	20	0	0	54	0
0	0	0	1	1	1	M	51	26.7	0	157	5	0	0	70	104	62	10.95	210	0.046	2546	13.92	82.8	0.55	90	1	1	4	1	1	0	0	0	1	1	1	0	1	42	35	35	48	19	0	0	85	0
0	0	0	1	0	1	M	63	23.67	1	116	0	0	0	93	140	93	8.99	151	0.076	252.4	16.31	36.6	1.94	90	1	1	4	1	1	0	0	0	1	1	1	0	1	53	29	33	49	17	0	0	55	0
0	0	0	1	1	0	M	71	18.82	2	141	2	0	0	82	140	95	7.03	152	0.156	1340	17.11	53.1	2.77	90	1	1	4	1	0	0	0	0	0	0	0	0	1	51	30	35	49	18	0	0	55	0
0	0	0	1	1	0	M	69	23.42	0	136	5	0	0	58	124	78	16.5	145	10	2587	6.86	140.8	2.92	90	1	1	4	1	1	1	0	0	1	0	1	0	1	42	38	35	50	12	0	0	51	1
0	0	0	1	1	0	M	46	22.99	1	107	5	1	0	65	110	70	7.22	118	0.055	531	5.17	42.6	3.15	90	0	1	4	1	0	0	0	0	2	1	1	0	0	50	40	38	58	19	0	0	79	0
0	0	0	1	0	0	M	50	26.45	1	149	6	0	0	110	150	90	6.69	203	1	2800	6.86	12.4	2.41	90	1	1	4	1	0	1	0	0	0	0	1	0	1	30	35	35	60	19	0	0	48	0
0	0	0	1	1	0	F	66	27.06	0	94	5	0	0	86	136	80	5.03	332	7.3	3174	6.28	26.9	5.64	90.2	1	1	4	4	0	1	0	0	1	2	1	0	1	66	39	35	50	15	0	0	1	1
0	0	0	1	0	0	F	59	19.48	0	116	5	0	0	102	170	103	12.38	179	1.11	1475	12.02	16.4	2.27	90.4	1	1	4	2	1	1	0	0	2	1	0	0	1	51	39	24	49	21	0	0	28	1
0	0	0	1	1	0	M	74	26.13	0	163	5	0	0	70	140	80	6.72	162	0.032	136	5.45	48.9	1.85	90.5	1	1	4	1	0	0	0	0	0	1	1	0	1	51	31	36	49	18	0	0	72	1
0	0	0	1	1	0	F	80	23.42	0	150	5	0	0	60	120	72	5.72	231	4.9	15880	5.81	41.6	2.55	90.5	1	1	5	4	1	0	0	0	1	0	1	0	1	51	35	35	49	19	0	0	1	1
0	0	0	1	1	0	M	44	21.31	1	113	0	0	0	70	154	100	18.08	162	0.911	5	5.22	24.1	4.04	91	0	1	4	1	0	1	0	0	1	0	1	0	1	68	35	35	41	19	0	0	103	0
0	0	0	1	0	1	M	70	22.76	1	122	5	0	0	80	140	90	8.93	273	15	353	5.28	45.2	2.65	91	0	1	4	2	0	0	0	0	1	0	2	0	1	73	30	38	41	18	0	0	1	1
0	0	0	1	0	0	M	68	23.42	1	131	5	0	0	60	120	70	7.29	217	0.663	210	14.01	26.5	2.82	91	1	1	4	1	1	1	0	0	1	0	0	0	1	30	35	35	50	19	0	0	43	1
0	0	0	1	1	0	M	53	26.2	2	115	7	0	0	72	126	76	9.05	151	1.89	1431	5.39	129.4	2.48	91	1	1	4	1	0	0	0	0	2	0	1	0	1	44	36	39	52	17	0	0	81	0
0	0	0	1	1	0	F	64	23.81	0	157	5	0	0	80	160	95	12.01	153	2.61	164	4.7	62.3	2.01	91.9	1	1	4	2	0	0	0	0	1	1	1	0	1	63	34	30	43	16	0	0	80	0
0	0	0	1	1	1	M	45	23.42	1	152	5	0	0	70	150	90	12.64	153	0.013	418	5.09	77.6	3.9	91.9	0	1	4	1	0	1	0	0	0	0	1	0	1	54	35	35	49	19	0	0	89	0
0	0	0	1	0	0	M	63	26.18	1	139	1	0	0	90	136	70	9.68	120	1.78	1024	8.51	36.3	1.66	92	1	1	4	1	0	0	0	0	1	1	1	0	1	69	37	34	46	18	0	0	70	0
0	0	0	1	1	0	F	78	19.22	0	129	5	0	0	112	174	82	16.89	189	10	5219	4.22	41.6	1.95	92	0	1	4	3	0	1	0	0	1	1	1	0	1	40	32	34	51	18	0	0	62	0
0	0	0	1	1	0	M	65	25.35	0	116	7	0	0	67	100	70	8.78	300	3.77	625	7.28	14.2	1.88	92.1	1	1	4	2	0	1	0	0	1	1	1	0	1	60	39	35	55	19	0	0	75	0
0	0	0	1	1	0	M	74	23.42	1	139	1	0	0	78	110	78	9.37	143	0.206	1404	4.44	72.5	2.87	92.2	1	1	4	1	0	0	0	0	0	0	1	1	1	56	33	35	51	19	0	0	88	0
0	0	0	1	0	0	M	65	23.42	1	110	0	0	1	118	108	76	13.3	121	64	10432	3.86	41.6	3.37	92.6	0	1	5	2	1	0	1	0	1	0	1	0	1	37	38	35	59	18	0	0	81	0
0	0	0	1	0	0	M	50	22.48	1	150	2	0	0	78	80	45	8.82	214	0.017	212	6.58	54	1.29	92.6	1	1	4	3	0	0	0	0	0	0	0	0	1	33	34	33	62	19	0	0	64	0
0	0	0	1	0	0	M	72	25.71	1	103	1	0	0	88	152	86	9.47	280	4.9	1247	4.97	8.8	2.88	93	1	1	4	1	0	0	0	0	1	1	1	0	1	52	37	34	45	18	0	0	91	0
0	0	0	1	1	0	M	74	23.42	1	119	5	0	0	90	105	70	6.76	191	0.935	370	4.78	12.2	1.73	93	1	1	4	1	0	0	1	0	0	1	1	0	1	58	36	36	50	18	0	0	51	0
0	0	0	1	1	1	M	42	23.42	1	144	5	0	0	93	166	112	13.67	187	0.036	1100	14.37	100.1	1.88	93	1	1	4	2	0	1	0	0	1	0	1	0	1	43	41	35	50	20	0	0	45	0
0	0	0	1	0	0	M	46	30.1	1	125	0	0	0	82	170	120	13.64	132	5.35	27	6.41	57.4	3.93	93	1	1	4	1	0	0	0	0	1	0	1	0	1	42	35	35	52	19	0	0	73	0
0	0	0	1	0	0	M	62	18.25	1	130	5	0	0	140	124	90	14.32	139	4.9	6653	5.59	19.8	1.33	93	1	1	4	3	0	0	0	0	1	1	1	0	1	23	30	38	65	18	0	0	61	0
0	0	0	1	0	0	M	66	21.26	1	135	0	0	0	93	116	80	12.58	252	8.93	2342	4.06	41.6	2.89	93	1	1	4	1	0	0	0	0	1	0	1	0	1	26	30	32	70	17	0	0	53	0
0	0	0	1	1	0	M	50	21.38	1	141	5	0	0	80	142	94	10.67	226	0.144	494	5.21	89.9	2.72	93.1	1	1	4	1	0	1	0	0	1	0	0	0	1	59	35	35	49	19	0	0	64	0
0	0	0	1	0	0	M	45	23.42	1	135	5	0	0	58	120	65	9.89	239	0.435	114	7.14	17.3	2.84	94	1	1	4	2	0	0	1	0	1	0	1	0	1	66	34	49	46	19	0	0	86	0
0	0	0	1	1	0	M	63	25.95	2	115	5	0	0	90	155	85	8.16	150	1.27	152	5.65	53	2.1	94	1	1	4	1	0	0	0	0	1	2	1	0	1	58	35	33	46	18	0	0	81	0
0	0	0	1	1	0	M	62	23.42	1	112	5	0	0	55	95	60	11.89	209	5.81	7200	5.34	41.6	2.33	94	1	1	4	1	1	1	0	0	1	1	1	0	1	55	37	35	47	20	0	0	50	0
0	0	0	1	0	1	M	68	21.77	1	85	1	0	0	78	120	75	7.88	112	3.92	3853	9.37	41.6	2.64	94	1	1	4	2	1	1	0	1	0	1	1	0	1	59	39	34	48	20	0	0	69	0
0	0	0	1	0	0	M	63	24.44	0	130	0	1	0	75	100	65	9.36	182	1.03	1114	4.86	22.7	4.15	94	0	1	4	1	0	1	0	0	1	0	0	0	1	64	29	35	49	19	0	0	78	0
0	0	0	1	0	0	M	52	21.63	2	158	5	0	1	72	102	62	8.55	141	9.57	3457	4.74	81.8	3.28	94	1	1	4	1	0	0	0	0	1	0	1	0	1	47	35	35	49	19	0	0	61	0
0	0	0	1	1	0	M	78	23.42	0	99	0	0	0	84	121	84	10.36	143	1.99	9771	5.2	41.6	2.42	94	0	1	4	3	0	0	0	0	1	0	3	1	1	51	35	31	49	15	0	0	62	0
0	0	0	1	0	0	M	60	26.62	0	134	5	0	0	70	120	70	8.93	152	4.9	72	6.21	41.4	3.26	94	1	1	4	1	0	0	1	0	1	1	1	0	1	50	35	35	51	19	0	0	52	0
0	0	0	1	0	0	M	69	28.13	0	110	5	0	0	80	160	80	7.53	176	1.14	1013	5.03	41.6	1.78	94	1	1	4	1	1	0	0	0	0	1	0	0	1	50	31	31	55	18	0	0	62	0
0	0	0	1	1	1	M	64	27.85	1	98	5	0	0	103	110	70	7.27	414	1.9	1500	11.89	5.8	3.25	94	1	1	4	3	1	0	0	0	1	1	1	0	1	32	30	32	57	19	0	0	49	0
0	0	0	1	0	0	M	80	23.42	1	149	1	0	0	78	135	89	19.41	224	3.6	7541	7.66	31.7	2.41	94	0	1	4	2	0	1	0	0	1	1	1	0	1	23	35	35	58	19	0	0	6	1
0	0	0	1	1	0	M	66	27.68	0	155	5	0	0	85	160	90	10.8	191	0.786	777	5.28	47.8	1.59	94.3	1	1	4	1	0	1	0	0	1	1	1	0	1	65	37	36	49	17	0	0	67	0
0	0	0	1	0	0	M	74	20.82	1	130	5	0	0	79	143	84	9.96	195	0.841	3183	6.38	20.6	2.24	94.3	1	1	1	2	0	1	0	0	1	0	0	0	1	62	32	36	51	19	0	0	101	0
0	0	0	1	1	1	M	68	27.18	1	113	1	0	0	88	160	70	9.22	169	0.444	390	6.86	4.9	2.77	94.5	1	1	4	1	1	1	0	0	1	1	1	0	1	51	44	36	43	19	0	0	83	0
0	0	0	1	0	1	M	64	23.18	1	119	5	0	0	68	123	85	9.09	145	5.23	649	3.86	10.9	3.41	95	1	1	4	2	0	1	0	0	1	0	1	0	1	65	36	35	41	19	0	0	59	0
0	0	0	1	0	0	M	46	23.42	1	137	5	0	0	100	130	80	8.26	198	0.874	19	6.05	27.2	1.71	95	0	1	4	1	0	0	0	0	0	0	1	0	1	63	39	33	42	20	0	0	59	0
0	0	0	1	0	1	F	74	23.42	0	134	0	0	0	40	130	62	14.1	154	5.12	2377	5.59	41.6	2.45	95	1	1	4	1	0	0	0	0	0	0	0	0	1	65	31	33	42	18	0	0	90	0
0	0	0	1	1	0	M	53	23.42	1	134	2	0	0	52	154	90	7.44	291	1.31	989	5.29	20.4	3.32	95	1	1	4	2	0	1	0	0	1	0	1	0	1	49	39	35	45	19	0	0	63	0
0	0	0	1	0	0	M	63	23.42	1	112	5	0	0	58	99	64	16.19	144	1.22	1900	4.84	33.7	2.27	95	1	1	4	2	0	1	0	0	0	0	1	0	1	38	29	38	49	22	0	0	51	0
0	0	0	1	1	0	M	49	25.35	1	132	1	0	0	75	130	100	20.59	145	10	21	5.66	33.5	4	95	1	1	4	1	0	1	0	0	1	0	1	0	1	58	29	34	51	20	0	0	70	0
0	0	0	1	0	0	M	58	24.8	1	170	5	0	0	100	180	100	15.84	687	0.415	132	3.23	23.9	3.28	95	0	1	4	1	1	0	0	0	0	0	0	0	1	64	28	35	54	20	0	0	89	0
0	0	0	1	1	1	F	76	24.56	0	150	7	0	0	65	116	95	6.59	220	1.9	5064	5.37	41.6	3.34	95	0	1	0	2	0	0	0	0	1	1	1	0	1	36	31	33	58	20	0	0	20	1
0	0	0	1	0	1	M	79	21.45	0	133	0	0	0	78	130	70	7.58	114	0.016	1607	5.51	36.4	2.86	95	1	1	4	1	0	1	1	0	1	2	1	0	0	52	33	36	59	20	0	0	91	0
0	0	0	1	1	0	M	60	29.97	0	137	1	0	0	85	140	80	5.78	124	0.023	866	6.6	15.5	4.22	95.1	1	1	4	2	0	1	0	0	1	1	0	0	1	36	32	33	60	20	0	0	74	0
0	0	0	1	0	1	M	66	29.3	1	122	7	0	1	90	95	62	8.03	160	3.43	28	5.03	18	3.82	96	1	1	4	2	0	1	0	0	1	0	1	0	0	60	36	39	44	16	0	0	78	0
0	0	0	1	0	1	M	53	31.22	0	132	1	0	0	73	160	100	9.79	157	0.029	306	5.31	26.8	2.47	96	1	1	4	1	0	1	0	0	0	0	1	0	1	66	35	35	45	19	0	0	57	0
0	0	0	1	1	0	M	50	23.42	1	122	4	0	0	85	135	70	9.87	211	0.289	689	6.86	10.4	2.77	96	1	1	4	1	0	1	0	0	1	0	0	0	1	48	35	35	48	19	0	0	60	0
0	0	0	1	0	1	F	75	24.56	0	123	5	0	1	60	150	70	9.03	146	5.77	2587	3.89	8.7	1.62	96.1	1	1	4	1	0	1	0	0	0	1	1	0	0	73	38	51	26	19	0	0	65	1
0	0	0	1	0	1	M	49	24.86	0	138	4	0	0	67	130	72	9.7	198	0.028	2587	6.86	43.7	1.63	97	1	1	4	1	0	1	0	0	0	0	0	0	1	56	35	35	46	19	0	0	89	0
0	0	0	1	0	1	M	52	25.39	0	144	5	0	0	74	110	70	18.21	196	2.03	463	3.65	23.6	1.88	97	1	1	4	1	0	1	1	0	1	0	1	0	1	51	35	35	49	19	0	0	98	0
0	0	0	1	0	0	M	61	26.08	0	122	5	0	0	80	125	78	6.54	193	0.341	557	4.45	14.1	3.2	97	1	1	4	1	0	0	0	0	1	2	1	0	1	63	35	35	49	19	0	0	86	0
0	0	0	1	0	1	M	75	25.95	1	85	0	0	0	65	120	80	25.05	556	17	4919	6.61	71.3	2.87	97	0	1	4	2	0	0	0	0	1	1	2	0	1	42	36	37	60	19	0	0	26	1
0	0	0	1	1	0	F	65	22.03	0	126	0	0	0	50	100	60	7.82	287	0.942	533	8.21	57.5	1.54	97.8	1	1	5	1	0	0	0	0	1	0	1	0	1	62	39	38	49	18	0	0	78	0
0	0	0	1	0	1	M	53	27.95	1	118	1	0	0	100	80	70	9.18	233	9.47	116	8.19	41.6	3.08	98	1	1	5	4	0	1	1	1	0	0	1	0	1	43	35	40	42	20	0	0	63	0
0	0	0	1	1	1	M	43	24.02	1	145	3	0	0	80	110	70	17.43	206	10	303	5.76	86.7	2.86	98	0	1	4	2	0	0	0	0	1	1	0	0	1	52	35	32	45	16	0	0	57	0
0	0	0	1	1	0	M	85	23.42	0	132	5	0	0	106	130	80	9.72	331	0.86	6400	11.13	75.1	2.68	98	1	1	4	2	1	0	1	0	0	0	2	0	1	38	45	38	46	18	0	0	36	1
0	0	0	1	1	0	M	75	19.53	1	114	5	0	1	49	179	90	7.03	165	0.365	330	5.15	13.9	1.75	98	0	1	4	1	0	1	0	0	0	1	1	0	1	68	35	35	47	19	0	0	64	0
0	0	0	1	0	1	F	70	19.48	0	149	7	0	0	60	115	75	7.91	174	24	1038	13.95	73.2	3.55	98	1	1	5	2	1	1	0	0	2	1	1	0	1	46	36	35	48	17	0	0	26	1
0	0	0	1	0	0	M	80	24.09	1	114	5	0	0	76	142	80	16.56	295	5.2	3793	4.51	23.2	1.76	98	1	1	4	1	0	1	0	0	1	1	1	0	1	49	37	36	50	17	0	0	59	0
0	0	0	1	0	0	M	75	23.42	2	160	7	0	0	65	133	86	12.85	220	8.2	2800	5.52	23.1	2.64	98	1	1	4	2	0	1	0	0	0	0	0	0	1	42	31	37	52	19	0	0	49	0
0	0	0	1	1	0	M	76	25.95	1	146	0	0	0	74	96	60	6.34	233	0.5	2288	5.63	84.4	2.22	98	1	1	0	1	0	1	0	0	1	1	1	0	1	51	37	39	59	17	0	0	100	0
0	0	0	1	0	1	M	61	24.11	0	114	5	0	1	58	140	90	10.56	174	3.94	293	4.1	113.2	2.16	98.4	1	1	4	1	0	0	0	0	0	1	1	0	0	66	28	37	52	18	0	0	68	0
0	0	0	1	1	1	M	61	27.97	1	122	5	0	0	55	142	88	7.04	157	0.522	78	4.96	36.8	2.27	99	1	1	4	1	0	1	0	0	1	0	1	0	1	74	36	35	48	18	0	0	57	0
0	0	0	1	0	1	M	62	23.42	1	151	0	0	0	82	130	70	7.35	136	0.844	5400	5.82	29.9	2.73	99	1	1	4	1	0	0	0	0	1	1	1	0	1	50	28	32	50	16	0	0	29	1
0	0	0	1	1	0	F	69	23.42	0	141	5	0	0	77	114	67	16.97	243	0.875	10356	8.84	64.4	2.44	99	0	1	4	3	1	0	1	0	2	0	1	0	1	58	33	30	50	20	0	0	57	0
0	0	0	1	1	0	M	66	23.42	1	113	5	0	0	68	126	80	9.15	250	1.2	48	6.86	4.2	3.13	99	0	1	4	1	0	1	0	1	1	0	1	0	1	45	36	36	51	17	0	0	90	0
0	0	0	1	1	0	M	73	23.83	0	127	5	0	0	68	90	60	8.22	226	0.626	2400	9.8	90.5	1.62	99	1	1	4	1	0	1	0	0	1	1	1	0	1	42	37	38	51	19	0	0	48	0
0	0	0	1	1	0	F	69	22.83	0	142	5	0	0	105	130	90	6.49	197	2.2	3923	6.04	34.9	2.13	99	1	1	4	3	0	0	0	0	1	0	0	0	1	45	34	37	54	19	0	0	91	0
0	0	0	1	1	1	M	61	23.42	0	150	5	0	0	89	130	90	13.71	230	10	473	5	28.7	2.48	99	0	1	4	1	0	0	0	0	1	0	1	0	1	40	36	36	65	19	0	0	82	0
0	0	0	1	0	1	M	69	19.68	1	120	1	0	0	78	112	72	8.49	110	0.108	7076	4.26	59.1	1.5	99.5	0	1	4	4	0	0	0	0	1	1	1	0	1	51	35	35	55	19	0	0	67	0
0	0	0	1	0	1	M	78	17.58	1	126	5	0	0	50	110	65	14.92	195	10	2616	3.62	102.1	0.85	100	0	1	4	2	0	0	0	0	0	1	1	0	1	46	30	36	43	20	0	0	75	0
0	0	0	1	1	1	M	59	23.42	1	137	3	0	0	55	100	60	10.14	206	0.11	128	5.54	39	2.63	100	1	1	4	1	0	0	0	0	0	0	0	0	1	70	36	34	45	20	0	0	86	0
0	0	0	1	1	0	M	72	22.68	1	109	0	0	0	100	160	130	13.97	195	4.23	2725	6.86	67.5	2.77	100	1	1	4	1	0	0	1	0	1	1	1	0	1	60	32	30	49	18	0	0	77	0
0	0	0	1	1	0	M	74	23.44	1	156	5	0	0	70	195	120	24.11	296	2.62	3525	5.12	32.5	2.51	100	1	1	4	1	0	1	0	0	1	1	1	0	1	47	35	35	49	19	0	0	32	1
0	0	0	1	0	0	F	64	17.69	0	124	5	0	0	92	110	70	11.39	135	0.081	6985	6.85	41.6	2.5	100	1	1	4	1	0	1	0	0	1	0	1	1	1	45	33	34	49	19	0	0	62	0
0	0	0	1	0	0	M	44	22.49	1	119	0	0	0	98	110	85	7.92	238	0.022	3074	5.32	17	2.39	100	1	1	4	1	0	0	0	0	1	1	0	0	1	42	38	35	55	19	0	0	80	0
0	0	0	1	1	1	M	51	28.34	0	115	5	0	0	88	80	50	9.87	253	0.934	1429	6.28	11.8	2.39	100	1	1	4	4	0	1	0	0	1	1	1	0	1	32	35	35	63	19	0	0	99	0
0	0	0	1	1	0	M	56	36.18	1	140	5	0	0	50	140	80	15.25	176	2.35	74	6.78	17	2.45	100.2	1	1	4	2	1	1	0	0	1	0	2	0	1	54	34	40	53	18	0	0	65	0
0	0	0	1	0	0	F	75	23.42	0	132	5	0	0	78	117	77	15.3	251	10	224	19.1	102.7	2.25	100.4	1	1	4	3	1	1	1	0	0	1	1	0	1	31	29	38	47	17	0	0	66	0
0	0	0	1	1	0	M	83	20.57	1	130	3	0	0	80	92	56	20.4	168	9.29	160	4.89	78.2	1.15	101	1	1	4	2	0	1	0	1	1	1	2	0	1	46	34	35	42	20	0	0	28	1
0	0	0	1	1	0	F	71	26.67	0	136	3	0	0	92	140	80	12.94	161	1.73	2788	7.05	31.4	1.74	101	1	1	4	1	0	0	0	0	1	1	1	0	0	60	25	20	42	17	0	0	80	0
0	0	0	1	0	0	M	78	23.42	1	115	1	0	0	80	145	86	13.42	109	6.51	907	6.86	12.84	2.77	101	0	1	4	2	0	1	0	0	0	1	1	0	1	57	37	37	46	19	0	0	93	0
0	0	0	1	1	0	M	80	21.23	1	138	0	0	0	60	150	90	9.39	139	0.055	5600	8.98	44.3	2.87	101	1	1	4	1	0	0	1	0	1	0	1	0	0	42	26	32	46	16	0	0	80	0
0	0	0	1	0	1	M	46	24.87	1	113	0	0	0	56	80	55	4.99	165	0.014	40	20.17	7.5	4.95	101	1	1	4	4	1	0	0	0	1	0	1	0	1	60	29	32	48	18	0	0	67	0
0	0	0	1	0	0	M	65	21.01	1	125	5	0	0	67	140	80	13.2	220	0.073	2367	4.45	87.2	3.67	101	1	1	4	1	0	1	0	0	1	0	1	0	1	58	44	32	49	19	0	0	75	0
0	0	0	1	0	1	M	81	23.42	1	98	3	0	0	55	134	76	9.69	104	19	3000	6.82	18.38	1.93	101	0	1	4	2	0	0	0	0	2	1	2	0	1	43	38	35	50	18	0	0	51	0
0	0	0	1	0	1	F	76	19.76	0	119	5	0	0	75	144	84	9.02	260	10	3877	3.9	27.9	2.77	101	1	1	4	1	0	1	0	0	1	0	1	0	1	39	31	38	56	21	0	0	63	0
0	0	0	1	0	0	M	73	23.42	1	111	1	0	0	58	92	60	10.11	150	4.81	222	4.62	65.9	2.44	101.8	1	1	4	1	0	1	0	0	2	0	2	0	1	51	43	56	49	18	0	0	74	0
0	0	0	1	1	0	M	54	22.1	0	135	5	0	0	75	130	76	14.22	143	2.97	477	4.72	41.6	1.94	101.9	1	1	4	1	0	1	0	0	1	1	2	0	0	69	35	35	40	19	0	0	77	0
0	0	0	1	1	1	M	79	22.49	2	130	5	0	0	67	180	100	14.22	202	7.39	105	4.38	26.4	1.56	102	0	1	4	2	0	1	0	0	1	0	1	0	1	67	32	38	44	17	0	0	75	0
0	0	0	1	0	0	M	61	24.22	1	140	5	0	0	90	125	80	9.38	102	0.163	505	6.22	33.3	2.22	102	1	1	4	2	0	0	0	0	1	0	0	0	1	57	32	39	45	19	0	0	101	0
0	0	0	1	1	0	M	74	25.26	0	145	5	0	0	62	136	72	8.97	126	0.275	465	5.08	34.2	2.66	102	0	1	4	2	0	1	0	0	1	0	0	0	0	57	31	36	47	18	0	0	22	1
0	0	0	1	0	0	M	40	28.39	1	126	0	0	0	84	120	80	8.15	181	5.25	64	11.65	64.4	3.04	102	1	1	4	1	0	1	0	0	2	0	1	0	1	51	42	36	49	18	0	0	100	0
0	0	0	1	0	0	M	58	22.77	1	143	3	0	0	76	110	85	9.5	149	0.358	731	5.55	36.8	2.68	102	1	1	4	2	0	0	0	0	1	1	0	0	1	42	41	34	49	18	0	0	81	0
0	0	0	1	0	1	F	78	29.14	0	134	1	0	0	90	130	80	15.38	246	1.24	6565	6.18	41.6	2.41	102	0	1	4	1	0	1	0	0	1	1	1	0	1	51	42	33	55	20	0	0	9	1
0	0	0	1	0	1	M	46	23.53	1	103	1	0	0	78	130	87	11.77	300	2.42	119	7.21	8.4	3.26	102.1	1	1	4	1	0	1	0	0	1	0	1	0	1	46	33	35	41	19	0	0	75	0
0	0	0	1	1	1	M	80	19.83	1	123	5	0	0	58	120	70	11.27	149	64	553	6.41	75.8	2.84	102.6	1	1	5	2	0	1	0	0	2	0	1	0	1	50	35	33	47	18	0	0	90	0
0	0	0	1	0	0	M	70	23.88	1	141	5	0	0	90	123	67	11.94	217	0.309	386	5.48	60.3	2.07	102.7	1	1	4	1	0	1	0	0	1	0	1	0	1	57	34	27	43	19	0	0
0	0	0	1	0	1	M	65	21.26	0	114	0	1	1	56	130	70	8.99	205	0.064	25	6.8	28.8	1.66	102.7	0	1	4	1	0	1	0	0	0	0	1	0	1	56	35	35	45	19	0	0	87	0
0	0	0	1	1	1	M	65	25.26	0	126	5	0	0	72	124	70	6.31	159	0.125	1144	5.46	77.3	2.01	103	1	1	4	1	0	0	0	0	1	1	1	0	1	66	27	32	42	20	0	1	60	0
0	0	0	1	1	0	M	42	30.42	1	110	5	0	0	90	140	100	9.78	226	6.74	193	5.99	41.6	3.95	103	1	1	4	1	0	0	0	0	1	0	3	1	1	45	35	35	48	19	0	0	72	0
0	0	0	1	0	1	M	63	24.22	1	114	0	0	0	59	142	76	8	190	0.083	310	5.32	76.7	2.05	103	0	1	4	1	0	0	0	0	0	0	3	0	1	51	29	38	49	19	0	0	45	0
0	0	0	1	0	0	F	71	22.89	0	117	7	0	0	80	130	80	10.96	197	0.11	1022	10.78	32.4	2.59	103.4	0	1	4	2	1	1	0	0	1	0	1	0	1	70	40	38	49	19	0	0	73	0
0	0	0	1	0	0	M	69	23.42	0	95	5	0	0	72	107	62	8.32	440	1.49	121	5.75	7.9	1.57	104	1	1	4	1	0	1	1	0	1	0	1	0	1	55	34	35	42	19	0	0	52	0
0	0	0	1	1	0	M	78	28.37	0	157	5	0	0	90	155	78	10.6	219	4.1	1044	4.09	12.5	4.03	104	0	1	4	1	0	0	0	0	0	0	0	0	1	68	35	35	45	19	0	0
0	0	0	1	1	0	M	68	23.42	1	114	5	0	0	48	115	76	11.38	234	3.91	125.2	5.06	70.6	2.13	104	1	1	4	2	0	0	0	0	1	1	1	0	1	68	30	32	48	17	0	0	56	0
0	0	0	1	1	0	M	59	23.03	1	114	5	0	0	72	120	70	7.89	183	3.09	33	4.7	27.4	3.82	104	1	1	4	1	0	0	0	0	1	1	0	0	1	47	38	35	50	19	0	0	92	0
0	0	0	1	1	0	M	73	23.42	1	130	6	0	0	62	61	39	14.26	214	26	838	3.55	31.2	1.77	104	1	1	5	4	0	1	1	0	1	1	1	0	1	57	33	36	51	17	0	0	61	0
0	0	0	1	0	0	M	58	25.53	1	156	5	0	0	61	110	70	5.39	207	0.214	1320	4.83	7.8	1.65	104	1	1	4	1	0	0	0	0	1	0	1	0	1	39	35	35	60	19	0	0	73	0
0	0	0	1	0	1	M	51	23.42	1	126	1	1	0	74	162	91	9.64	251	0.383	340	5.34	34.5	2.41	105	0	1	4	1	0	1	0	0	1	1	1	1	1	48	44	37	44	18	0	0	44	0
0	0	0	1	0	0	M	69	21.88	1	110	0	1	0	62	126	88	9.32	97	10	110	5.49	41.6	1.51	105	1	1	4	2	0	0	0	0	2	0	2	0	1	51	38	40	49	15	0	0	97	0
0	0	0	1	1	1	M	65	18.29	0	139	1	0	0	70	115	70	12.76	189	0.146	1632	4.26	69.4	2.08	105	1	1	4	1	0	0	0	0	1	0	1	0	1	51	35	35	49	19	0	0	1	1
0	0	0	1	0	0	M	55	23.42	1	113	5	0	0	68	125	80	6.33	154	36	171	6.23	12.9	2.57	105	1	1	4	1	0	1	0	0	0	0	0	0	1	50	35	35	55	19	0	0	62	0
0	0	0	1	0	0	M	67	24.58	0	135	5	0	0	74	130	70	15.28	159	33	2115	9.29	36	2.96	105.5	0	1	4	2	0	0	0	0	1	0	0	0	1	51	35	35	49	19	0	0	69	0
0	0	0	1	1	1	M	61	21.97	0	142	5	0	0	87	160	100	8.71	209	1.12	759	10.12	37.2	2.86	105.8	1	1	4	2	0	1	0	0	2	0	1	0	1	51	40	35	49	20	0	0	83	0
0	0	0	1	1	0	M	77	21.3	1	114	5	0	0	90	130	80	12.77	226	2.72	89	4.61	30.2	3.87	106	1	1	4	2	0	1	1	0	1	1	1	0	1	60	35	35	48	19	0	0	52	1
0	0	0	1	1	0	M	68	23.42	1	127	5	0	0	67	106	75	10.76	235	36	4983	5.33	75.6	1.92	106	0	1	4	2	0	0	0	0	1	0	1	0	1	34	33	34	48	16	0	0	17	1
0	0	0	1	1	1	M	67	26.57	0	140	5	0	0	80	150	90	8.98	129	5.94	397	7.43	64.3	1.94	106	1	1	4	1	1	0	0	0	0	0	1	0	1	51	38	35	49	19	0	0	76	0
0	0	0	1	0	0	M	78	27.64	2	110	5	0	0	72	130	80	11.38	132	64	2014	5.96	28.3	3.4	106	1	1	4	2	0	1	0	0	1	1	1	0	1	62	42	39	49	19	0	0	69	0
0	0	0	1	0	0	M	88	23.83	1	137	4	1	0	48	102	65	9.99	134	3.85	2587	6.86	26.3	2.77	106	1	1	4	3	0	1	0	0	1	1	1	0	1	58	40	40	50	20	0	0	60	0
0	0	0	1	1	0	M	79	23.42	0	86	5	0	0	90	130	70	11.26	183	1.89	1106	9.97	15.3	2.14	106	0	1	4	2	1	1	0	0	0	0	3	0	1	42	39	38	55	16	0	0	78	0
0	0	0	1	0	0	M	65	23.42	1	144	3	0	0	61	143	90	9.37	228	1.54	190	6.99	65.1	3.29	106	1	1	4	2	0	0	0	0	0	0	1	0	0	52	33	38	59	20	0	0	46	0
0	0	0	1	1	0	M	78	20.31	1	112	5	0	0	52	130	70	7.07	164	8.7	1425	6.03	27	2.81	106.6	1	1	4	2	0	1	0	0	2	1	1	0	1	60	35	35	47	19	0	0	54	1
0	0	0	1	1	1	M	77	22.91	1	141	5	0	0	65	135	80	11.79	240	0.132	975	4.94	77.8	1.54	106.8	0	1	4	1	0	1	0	0	0	1	1	0	1	77	40	32	49	18	0	0	97	0
0	0	0	1	0	1	M	70	19.14	1	140	5	0	0	80	120	80	11.9	240	64	75	4.17	65.8	0.89	107	1	1	4	4	0	0	0	0	1	0	1	0	1	50	30	31	44	19	0	0	61	0
0	0	0	1	1	0	M	67	23.42	1	141	5	0	0	91	97	56	9.82	134	1.15	1778	6.42	20.8	2.77	107	0	1	4	1	0	1	0	0	0	1	1	0	1	66	34	37	48	17	0	0
0	0	0	1	0	1	F	66	22.67	0	77	5	0	0	74	120	85	7.76	203	0.5	2140	5.74	33.3	2.94	107	1	1	4	4	0	0	0	0	1	0	1	0	1	44	34	38	51	18	0	0	69	0
0	0	0	1	0	0	M	60	23.42	0	140	0	0	0	102	108	80	7.4	183	6	31647	5.01	13.63	2.78	107	1	1	5	2	0	0	0	0	1	0	2	0	1	16	36	34	67	15	0	0	1	1
0	0	0	1	0	1	M	82	23.42	0	149	1	0	0	78	137	85	17.01	209	4.99	360	15.46	45.1	2.3	107.4	0	1	4	1	0	1	0	0	1	1	1	0	1	40	35	35	55	19	0	0	73	0
0	0	0	1	1	1	M	54	23.05	0	156	5	0	0	90	140	80	6.87	166	0.008	420	4.8	84.4	3.28	108	1	1	4	2	0	1	0	0	1	0	1	0	1	56	29	30	47	18	0	0	48	0
0	0	0	1	1	0	F	73	18.37	0	144	5	0	0	48	130	77	14.63	158	29	15077	10.61	51	2.77	108	1	1	5	2	0	1	0	0	2	1	2	0	1	40	41	37	50	19	0	0	30	1
0	0	0	1	1	0	M	54	28.52	1	108	5	0	0	100	109	70	8.19	192	7.8	3700	7.75	51.8	1.72	108	0	1	4	3	0	0	0	0	0	1	1	0	1	45	27	30	55	17	0	0	51	0
0	0	0	1	1	0	M	54	23.42	1	132	5	0	0	120	120	85	12.48	268	4.78	2587	12.57	34.8	3.35	109	0	1	4	4	1	1	1	0	1	0	1	0	0	36	30	33	58	17	0	0	24	1
0	0	0	1	1	1	M	64	24.77	1	172	5	0	0	80	99	60	11.94	147	7.28	1200	6.86	85	2.77	110	1	1	4	2	0	0	0	0	1	0	0	0	1	50	37	33	46	14	0	0	50	0
0	0	0	1	1	1	M	76	23.53	1	147	5	0	0	55	190	92	5.97	165	9.6	470	5.92	52	3.45	110	1	1	5	2	0	0	0	0	1	1	1	0	1	58	29	36	50	18	0	0	80	0
0	0	0	1	1	0	M	72	25.18	1	133	7	0	0	60	112	70	6.06	217	21	2029	6.86	33.4	2.75	110	1	1	4	2	1	1	0	0	1	1	1	0	1	33	35	40	58	20	0	0	41	1
0	0	0	1	1	1	M	77	23.42	2	128	5	0	0	89	140	106	11.42	267	10	15797	6.52	55.5	4.55	110	1	1	4	2	0	1	0	0	1	1	1	0	0	20	35	32	66	17	0	0	52	0
0	0	0	1	0	0	M	88	23.42	1	149	5	0	0	70	102	70	8.1	216	0.014	15636	4.57	15.1	2.85	110.7	1	1	4	2	0	1	0	0	2	2	0	0	1	41	40	39	60	22	0	0	65	0
0	0	0	1	0	0	M	66	22.27	0	140	7	1	0	48	150	100	10.1	135	0.384	2587	7.45	24.5	3.27	111	1	1	4	1	1	1	0	0	0	2	2	0	1	58	31	39	52	18	0	0	1	1
0	0	0	1	0	0	M	62	24.54	1	131	5	0	0	67	148	72	6.24	209	0.336	676	6.86	54.6	7.63	111	1	1	4	1	0	1	0	0	1	2	0	0	1	48	35	35	55	19	0	0	54	0
0	0	0	1	1	1	M	63	26.44	1	152	5	0	0	104	200	120	18.28	277	64	2656	11.68	151	2.65	111.5	0	1	4	2	0	0	0	0	0	0	0	0	1	45	37	37	50	18	0	0	54	1
0	0	0	1	0	1	M	69	23.42	1	159	5	0	0	87	110	60	11.15	279	2.27	30	5.32	41.6	3.64	112	1	1	4	2	0	0	1	0	0	0	0	0	0	47	30	30	50	18	0	0	56	0
0	0	0	1	0	0	M	66	22.86	0	154	7	0	0	64	126	76	8.79	237	19	23000	9.96	14.12	3.18	112	1	1	4	3	0	1	1	0	1	1	1	0	1	51	36	28	55	20	0	0	44	0
0	0	0	1	0	0	F	64	18.03	0	110	1	0	0	70	123	90	9.52	113	4.37	4677	9.72	10.3	4.18	112	1	1	4	3	0	1	1	0	2	1	2	0	1	22	41	39	73	18	0	0	29	1
0	0	0	1	1	0	F	82	25.39	0	91	3	0	0	95	185	80	6.71	134	0.015	4548	9.18	14.5	2.82	112.5	1	1	4	2	0	1	0	0	1	1	0	0	1	51	30	26	49	17	0	0	90	0
0	0	0	1	0	1	M	72	17.72	2	138	5	0	0	70	97	56	7.34	237	64	3557	5.04	254.8	1.19	113	0	1	4	4	0	1	0	0	1	0	0	0	0	51	35	33	44	20	0	0	70	0
0	0	0	1	0	0	F	81	20.17	0	125	5	0	0	122	150	100	9.59	158	43	2400	8.49	41.6	3.66	113	1	1	4	4	0	0	0	0	1	1	1	0	1	42	31	40	45	18	0	0	13	1
0	0	0	1	0	0	M	49	23.42	1	111	1	0	0	80	170	110	6.43	269	0.76	2587	7.69	76.7	3.44	114	1	1	4	2	0	1	0	0	1	0	1	1	0	58	36	33	47	18	0	0	53	0
0	0	0	1	0	1	M	59	27.94	1	117	5	1	1	72	110	70	9.05	156	2.99	6871	3.75	54.9	3.46	114	1	1	4	2	0	1	0	0	1	1	0	0	1	21	42	35	60	18	0	0	62	0
0	0	0	1	1	1	M	82	26.45	1	119	6	0	1	100	200	100	10.16	80	0.14	6278	5.77	92.6	3.55	114.2	0	1	4	3	0	1	0	0	1	0	2	0	1	51	45	39	49	20	0	0	103	0
0	0	0	1	0	1	M	79	23.42	1	158	1	0	0	90	130	90	13.63	147	1.13	17688	6.69	120.2	0.99	114.8	0	1	4	3	1	1	0	1	1	0	1	0	1	29	35	35	72	19	0	0	1	1
0	0	0	1	0	1	M	67	22.27	0	132	5	0	0	75	150	86	11.84	205	1.51	310	4.78	20.5	2.47	115	0	1	4	1	0	1	0	0	1	1	1	0	1	72	35	35	43	19	0	0	89	0
0	0	0	1	0	0	M	63	23.38	0	136	5	0	0	56	90	60	9.41	122	1.5	112	6.39	17.3	2.99	115	1	1	4	1	0	0	0	0	1	0	2	0	1	47	32	52	50	19	0	0	73	0
0	0	0	1	0	0	M	68	26.77	1	135	5	0	0	40	80	50	8.08	232	0.299	100	8.07	28.7	2.39	116	1	1	4	1	0	0	0	0	1	1	0	0	1	58	35	35	45	19	0	0	47	0
0	0	0	1	0	1	M	79	19.72	0	146	5	0	0	83	140	90	14.11	242	64	10525	5.27	75.7	2.65	116	1	1	4	1	0	1	0	0	1	1	1	0	1	39	37	35	55	20	0	0	37	1
0	0	0	1	0	0	M	64	24.24	1	135	1	0	0	42	70	40	9.51	165	0.273	108	19.61	37.2	2.57	116.3	1	1	4	4	0	1	0	1	1	0	1	0	1	52	35	35	48	19	0	0	65	1
0	0	0	1	0	0	M	60	19.27	1	119	1	0	0	59	90	60	11.54	141	2.82	1577	7.99	36.9	1.76	116.5	1	1	4	4	0	0	0	0	1	0	2	0	1	58	30	20	44	20	0	0	103	0
0	0	0	1	1	1	M	59	23.42	1	151	5	0	0	60	120	70	9.11	156	0.142	100	6.69	86.7	2.98	118	1	1	4	2	0	1	0	0	1	0	1	0	1	49	33	52	48	26	0	0	48	0
0	0	0	1	1	0	M	87	22.41	0	122	1	0	0	68	125	70	12.43	257	32	3680	5.27	53.8	1.52	118	1	1	4	1	0	1	1	0	1	1	0	0	1	47	36	33	54	16	0	0	77	0
0	0	0	1	1	0	M	83	27.55	1	124	7	0	0	83	110	80	11.84	85	64	12286	5.25	83.3	3.37	118	1	1	4	3	0	1	0	0	2	0	1	0	1	37	36	30	56	14	0	0	64	0
0	0	0	1	1	0	M	70	23.88	1	103	5	0	0	102	170	90	11.32	207	3.18	3550	11.89	41.6	3.98	118	0	1	4	1	0	1	0	0	1	1	1	0	1	51	31	34	63	19	0	0	102	0
0	0	0	1	1	0	M	71	23.42	1	135	5	0	0	130	100	70	11.6	268	4.64	15777	13.62	52	2.28	119	1	1	4	4	1	1	0	0	1	1	1	0	1	34	32	35	57	18	0	0	33	1
0	0	0	1	0	0	M	66	21.48	1	140	7	0	0	64	130	100	12.01	269	0.045	900	5.16	22.2	2.1	120	0	1	4	1	0	1	0	0	0	0	0	0	1	64	36	35	46	20	0	0	46	0
0	0	0	1	1	1	M	48	23.42	1	113	5	0	0	58	130	95	10.5	309	6.11	1038	5.49	45.8	3.91	120	1	1	4	2	0	1	0	0	1	0	1	0	1	42	36	37	57	17	0	0	70	0
0	0	0	1	0	1	F	75	23.42	0	120	5	0	0	70	135	60	12.94	192	7.5	4009	5.83	49.4	1.54	120.5	0	1	4	3	0	0	0	0	0	1	1	0	1	63	33	38	45	19	0	0	5	1
0	0	0	1	1	0	F	67	23.42	0	135	5	0	0	80	140	100	13.34	176	2.58	21817	6.84	36.9	3.23	120.8	0	1	4	3	0	0	1	0	1	1	1	0	1	51	37	37	54	19	0	0	66	0
0	0	0	1	0	1	M	61	23.42	1	112	5	1	0	96	130	85	8.85	111	10	17404	18.53	62.2	3.78	121.9	1	1	4	2	1	1	1	0	2	1	1	0	1	40	44	35	56	21	0	1	67	0
0	0	0	1	0	0	M	72	25.01	1	121	0	0	0	88	120	72	10.5	86	2.73	5692	4.78	32	1.55	123	1	1	4	2	0	0	0	0	2	1	1	0	1	48	38	38	46	18	0	0	63	0
0	0	0	1	0	1	M	67	23.42	1	142	5	0	0	55	90	60	7.37	308	25	1447	5.47	54.7	4.1	123	0	1	4	2	0	1	0	0	1	1	1	0	1	60	35	35	48	19	0	0	63	0
0	0	0	1	1	0	M	77	23.42	1	133	7	0	0	65	169	98	7.72	150	0.618	4829	3.97	33.1	1.96	123	0	1	4	2	0	1	0	0	2	0	1	0	1	67	43	35	51	19	0	0	61	0
0	0	0	1	1	1	F	68	19.72	0	126	5	0	0	74	120	70	15.7	138	0.236	6293	2.9	29.7	2.95	123.6	1	1	4	2	1	1	0	0	1	1	1	0	1	49	33	36	40	19	0	0	69	0
0	0	0	1	1	1	M	71	21.05	0	94	5	0	0	104	120	70	11.95	128	64	872	6.18	18.2	1.73	123.7	0	1	4	1	0	1	0	0	0	1	1	0	1	39	19	31	49	17	0	0	76	0
0	0	0	1	0	0	M	64	21.3	2	126	7	0	0	110	100	60	10.47	175	40	15000	8.01	73.6	2.17	125	0	1	4	2	0	1	0	0	2	1	1	0	0	18	37	36	70	20	0	0	2	1
0	0	0	1	1	1	M	67	23.8	1	134	5	0	0	85	150	80	14.42	182	0.145	448	6.58	26.6	2.68	125.3	1	1	4	2	1	0	0	0	0	1	0	0	1	50	35	35	55	19	0	0	72	0
0	0	0	1	1	0	M	72	26.35	0	126	5	0	1	82	170	86	12.64	200	3.12	1935	8.44	23.9	2.89	126	0	1	4	2	0	0	0	0	2	1	2	0	0	64	42	48	46	20	0	0	77	0
0	0	0	1	0	1	M	65	17.31	1	142	5	0	0	82	92	65	13.23	142	0.017	5906	9.35	36.9	2.3	126.6	1	1	4	2	0	1	1	0	1	1	1	0	1	63	31	37	43	20	0	0	68	0
0	0	0	1	0	0	F	73	23.42	0	136	1	0	0	64	140	80	4.41	179	0.022	10865	5.71	7.3	2.42	127	1	1	0	2	0	1	0	0	2	1	1	0	1	57	35	35	43	19	0	0	68	0
0	0	0	1	1	0	M	76	21.08	1	131	5	0	0	75	128	67	10.43	100	10	3100	16.32	79.9	3.4	127	1	1	4	3	1	0	0	0	1	1	1	0	1	60	35	30	45	18	0	0	49	0
0	0	0	1	1	0	M	67	23.42	0	121	5	1	1	118	150	80	9.11	154	1.13	5100	14.76	64.5	2.22	127	0	1	4	3	0	0	0	0	1	1	1	0	1	36	35	35	63	19	0	1	5	1
0	0	0	1	0	0	M	72	23.42	1	101	0	0	0	118	165	100	8.51	187	33	213	15.06	42	2.53	127.2	1	1	4	2	1	0	0	0	2	0	2	0	1	63	40	44	53	17	0	0	103	0
0	0	0	1	1	0	M	88	24.45	1	111	5	0	0	50	120	80	6.22	192	5.71	10214	5.49	35	5.49	129	0	1	4	3	0	1	0	0	0	2	1	0	1	48	39	33	48	17	0	0	54	0
0	0	0	1	1	0	M	66	18.67	0	150	5	0	0	83	240	140	13.57	240	58	2696	4.55	35.8	3.55	130	0	1	5	1	0	1	0	0	1	1	0	0	1	41	30	36	56	18	0	0	78	0
0	0	0	1	0	0	F	72	24.97	1	118	3	0	1	88	140	90	8.62	213	4.86	6710	8.24	16.9	2.77	130.1	0	1	4	2	0	0	0	0	2	0	1	0	0	45	27	36	51	19	0	0	79	0
0	0	0	1	0	1	F	76	25.07	0	93	5	0	0	48	160	70	5.48	117	0.975	11147	21.29	11.1	4.29	131	0	1	4	1	1	1	0	0	1	1	1	0	1	60	35	35	43	19	0	0	10	1
0	0	0	1	1	0	M	74	23.42	1	102	5	0	0	90	134	81	11.87	281	3.61	5228	13.83	41.6	1.46	131	0	1	4	3	1	1	0	0	0	0	1	0	0	45	34	37	45	20	0	0	56	0
0	0	0	1	0	1	M	58	25.51	1	106	5	0	0	76	135	80	10.29	218	0.044	627	6.99	71.4	0.81	131	1	1	4	2	1	0	0	0	1	1	1	0	1	66	32	32	49	18	0	0	79	0
0	0	0	1	1	0	M	62	23.42	1	143	7	0	0	74	180	120	8.33	253	0.013	398	4.57	37.9	3.57	131	1	1	4	2	0	1	0	0	1	0	1	0	1	38	36	34	52	20	0	0	91	0
0	0	0	1	1	0	F	80	23.42	0	123	7	0	0	108	128	86	7.42	144	1.49	7706	7.5	36.5	3.22	131	0	1	4	3	0	1	0	0	1	1	1	0	1	37	35	35	56	19	0	0	80	0
0	0	0	1	0	1	F	60	21.93	0	153	5	0	0	54	98	60	8.34	154	0.024	7700	21.52	27.5	2.81	132	1	1	4	1	1	1	0	0	1	0	0	0	1	43	31	31	43	17	0	0	45	0
0	0	0	1	0	0	M	62	23.42	0	105	5	0	1	92	98	76	11.85	383	0.469	5483	7.08	76.5	2.77	132	1	1	4	2	0	1	0	0	1	1	1	0	1	60	33	32	47	17	0	0
0	0	0	1	1	0	M	84	27.34	0	136	1	0	0	105	125	70	13.35	251	4.59	2702	6.86	84.4	2.05	132	1	1	4	2	0	1	0	0	1	1	1	0	1	51	32	35	49	18	0	0	64	0
0	0	0	1	0	0	M	79	27.86	0	147	4	0	0	75	180	95	9.42	180	0.442	2304	5.22	16	2.31	132	1	1	4	1	0	1	0	0	1	0	1	0	1	45	33	27	55	15	0	0	67	0
0	0	0	1	0	0	M	70	23.66	1	127	0	0	0	83	140	82	11.99	179	14	8572	12.75	41.6	5.4	133	1	1	4	2	1	0	0	0	1	0	1	0	0	58	28	48	52	25	0	0	60	0
0	0	0	1	0	1	M	74	26.35	1	120	5	0	0	75	180	105	12.52	163	0.226	167	6.93	43.7	2.84	138	1	1	4	1	0	0	0	0	1	1	2	1	1	60	37	39	50	22	0	0	18	1
0	0	0	1	0	1	M	64	23.42	1	134	5	0	0	51	160	90	7.59	195	0.129	91	8.35	22.4	3.04	139.8	1	1	4	2	0	0	0	0	1	1	1	0	1	50	35	35	55	19	0	0	79	1
0	0	0	1	0	0	M	62	19.83	1	127	0	0	0	100	170	70	7.48	109	0.603	21000	7.33	48.1	3.01	140	0	1	4	3	0	1	1	0	1	1	1	0	1	40	34	42	51	20	0	0	48	0
0	0	0	1	0	0	M	64	23.42	1	133	7	0	0	50	70	50	8.5	245	0.615	3200	9.32	50.2	1.67	141	1	1	4	1	1	1	0	0	1	1	1	0	1	50	40	36	55	21	0	0	51	0
0	0	0	1	0	0	M	75	21.97	1	132	1	0	0	73	162	91	13.41	158	7.99	13442	7.52	62.8	3.27	142	1	1	4	2	1	0	0	0	1	1	0	0	1	29	40	31	59	18	0	0
0	0	0	1	0	0	M	60	23.42	2	114	0	0	0	68	160	120	6.63	138	1.05	459	3.87	15.2	2.93	142.6	0	1	4	2	0	0	0	0	1	0	1	0	1	70	27	32	45	19	0	0	89	0
0	0	0	1	1	0	M	77	23.95	1	159	5	0	0	127	138	96	7.56	184	0.314	33609	5.78	28.4	1.87	144.3	1	1	4	3	0	1	0	0	0	1	1	0	1	38	31	34	61	17	0	0	103	0
0	0	0	1	0	0	F	75	22.66	0	129	5	0	0	105	150	90	10.02	265	10.654	2072	3.93	41	3.35	145	1	1	5	2	0	0	0	0	0	1	1	0	0	50	34	34	53	32	0	0	16	1
0	0	0	1	0	1	M	77	17.85	0	117	4	0	0	100	112	76	14.44	170	0.099	31309	8.35	39.2	2.78	145.1	1	1	4	3	0	1	0	0	1	1	1	0	1	40	36	38	60	20	0	0	63	1
0	0	0	1	0	1	M	66	24.22	1	117	0	0	1	65	110	62	23.18	256	64	3500	6.39	310.9	2.67	146	0	1	4	2	0	0	0	0	1	0	1	0	1	57	35	35	48	19	0	0	46	0
0	0	0	1	0	1	M	73	23.18	1	133	0	0	0	82	165	92	9.63	229	0.117	4743	4.85	34	3.64	146	1	1	4	1	0	0	0	0	2	1	2	1	1	60	35	33	52	20	0	0	86	0
0	0	0	1	0	0	M	74	28.01	0	150	6	1	0	56	120	90	11.94	143	20	1193	3.96	10.2	2.53	146	0	1	5	2	0	1	0	0	0	1	0	0	1	52	38	32	58	18	0	0	101	0
0	0	0	1	0	1	M	79	23.42	1	128	0	1	0	68	100	60	6.81	153	5.5	25000	5.3	16.9	2.08	146	0	1	4	1	0	1	1	0	1	1	1	0	1	23	35	35	61	19	0	0	22	1
0	0	0	1	0	0	F	61	25.97	0	126	5	1	0	76	173	115	9.06	148	1.46	2587	6.82	46.4	3.35	147	1	1	4	2	1	0	1	0	1	1	1	0	1	55	38	38	49	21	0	0	54	0
0	0	0	1	0	0	F	74	23.42	0	140	0	0	1	92	105	79	19.44	143	7.03	15000	9.54	25.8	2.49	147	0	1	4	3	1	1	0	0	2	1	1	0	0	35	35	35	55	19	0	0	15	1
0	0	0	1	1	0	M	55	23.42	1	139	1	0	0	79	124	68	9.64	133	6.02	2587	8.22	84.3	2.77	149	0	1	4	4	0	0	0	1	1	0	1	0	1	51	35	35	49	19	0	0	1	1
0	0	0	1	0	1	M	77	27.97	1	103	1	0	0	85	124	87	7.52	149	9.61	4362	9.45	43.5	4.23	149	1	1	4	2	1	1	0	0	1	0	1	0	1	48	32	35	51	18	0	0
0	0	0	1	0	0	F	82	31.79	0	108	5	0	0	97	177	87	9.34	183	0.149	3117	5.42	25.9	3.13	150	0	1	4	1	0	1	1	0	0	0	2	0	1	60	35	32	49	17	0	0	9	1
0	0	0	1	0	1	F	78	14.34	1	126	0	0	0	50	88	49	9.71	193	4.89	2139	5.94	51.6	3.13	154	1	1	4	3	1	0	0	0	1	1	1	0	0	55	31	33	49	16	0	0	11	1
0	0	0	1	0	0	M	66	23.42	1	106	5	0	0	88	112	80	10.44	240	20	3605	5.89	33.3	1.35	154	1	1	4	4	0	0	0	0	1	1	1	0	1	50	37	38	51	16	0	0	64	0
0	0	0	1	1	0	M	76	18.67	1	152	5	0	0	78	140	90	11.81	148	4.91	2587	4.6	38.2	3.66	156	1	1	4	1	0	1	0	0	1	1	1	0	1	44	33	37	46	18	0	0	64	0
0	0	0	1	0	0	M	82	22.04	1	105	5	0	0	115	144	80	8.17	382	0.045	4867	3.55	25.7	2.87	156	0	1	4	2	0	1	0	0	1	1	1	0	1	50	35	35	55	19	0	0	56	0
0	0	0	1	1	0	M	79	23.42	1	113	1	0	0	94	140	80	10.37	333	1.48	8034	13.2	8.7	2.43	158	0	1	4	2	1	1	0	0	0	1	1	0	0	51	33	30	46	17	0	0
0	0	0	1	1	0	M	81	23.42	1	125	5	0	0	90	111	76	7.23	163	0.576	30000	6.86	22.8	2.59	158	0	1	4	2	0	1	0	0	2	1	1	0	1	48	38	26	49	17	0	0	45	0
0	0	0	1	1	1	M	72	23.42	1	129	0	0	0	85	120	80	9.39	162	8.84	5107	5.24	34.4	2.95	159	1	1	4	1	0	0	0	0	1	0	1	0	1	68	36	34	52	20	0	0	67	0
0	0	0	1	1	0	F	68	29.78	0	4.35	0	1	0	76	170	90	8.43	152	3.67	1039	5.62	42.4	2.13	161	1	1	4	2	0	0	1	0	1	1	1	0	1	65	30	32	46	18	0	0	57	0
0	0	0	1	1	1	F	68	23.42	0	149	5	0	0	100	98	58	10.94	373	33	19455	7.56	45.5	3.84	167	0	1	4	1	0	1	0	0	0	0	1	0	1	41	35	35	47	19	0	0	1	1
0	0	0	1	0	1	M	82	24.97	1	142	1	0	0	65	173	103	13.73	188	2.7	3013	4.78	24.6	1.92	172	1	1	5	2	0	0	0	0	1	1	0	0	1	62	37	35	43	17	0	0	30	1
0	0	0	1	1	1	M	72	23.44	1	136	0	0	0	112	113	80	11.26	162	0.098	989	8.61	157	4.17	172	1	1	4	2	0	1	0	0	2	1	2	1	0	48	36	39	46	18	0	0	55	0
0	0	0	1	0	0	M	66	24.8	0	157	7	0	0	40	115	65	14.24	219	3.92	8483	12.4	67.4	2.88	178.3	1	1	4	4	1	1	0	0	1	1	1	0	1	60	38	39	42	20	0	0	39	1
0	0	0	1	1	0	M	71	20.76	1	150	5	0	0	80	100	70	9.7	215	12	6949	5.69	21.7	3.26	182	1	1	4	3	0	0	0	0	1	0	0	0	1	46	37	38	49	20	0	0	58	0
0	0	0	1	1	1	M	69	26.3	0	130	5	0	0	66	100	80	9.88	268	10	9438	5.05	41.6	1.8	190	0	1	4	1	0	1	1	0	1	1	1	0	1	55	39	38	47	20	0	0	46	0
0	0	0	1	0	0	M	86	18.75	2	132	5	0	0	100	210	120	10.38	98	2.11	27251	5.11	37.4	2.14	192	0	1	4	3	0	0	0	0	1	1	1	0	0	35	35	35	57	19	0	0	90	0
0	0	0	1	1	0	M	77	23.42	1	119	5	0	0	45	110	75	5.3	145	1.08	1498	3.91	87.8	1.29	197.6	0	1	4	4	0	1	1	1	1	0	1	0	1	51	35	35	49	19	0	0	1	1
0	0	0	1	0	0	F	80	17.8	0	117	0	0	0	120	183	123	13.06	168	0.467	4753	5.2	130.2	1.47	198	0	1	4	4	1	0	0	0	1	1	1	0	1	50	35	35	47	19	0	0	27	1
0	0	0	1	0	0	M	68	18.37	1	93	0	1	0	63	83	57	5.7	90	1.29	15613	5.26	28.3	2.06	210.5	0	1	4	4	0	0	0	0	1	1	1	0	0	57	35	35	49	19	0	0	66	0
0	0	0	1	1	1	M	86	23.42	1	133	7	0	0	82	150	96	20.72	191	3.8	35000	6.19	100.5	3.47	219.8	0	1	4	1	0	1	1	0	3	0	2	0	1	51	40	36	49	20	0	0	91	0
0	0	0	1	1	0	F	81	23.42	0	114	5	0	0	92	124	72	13.68	225	2.95	9500	6.04	18.5	1.89	223	0	1	4	2	1	1	0	0	1	1	1	0	1	30	48	42	53	17	0	0	44	0
0	0	0	1	0	1	F	78	18.73	0	109	5	0	0	90	176	87	7.96	155	48	24807	5.11	37.6	4.09	225	0	1	4	2	0	1	0	0	1	1	1	0	1	70	39	35	41	18	0	0	1	1
0	0	0	1	1	1	M	71	25.78	0	116	5	0	0	80	120	80	9.42	217	15	21163	5.35	15.3	3.54	232	0	1	4	1	0	1	0	0	2	1	2	0	1	23	36	40	67	19	0	0	1	1
0	0	0	1	1	0	M	80	23.83	1	142	5	0	0	105	140	70	17.61	377	6.5	216	5.62	53.2	2.33	241	1	1	4	2	0	1	1	0	1	1	1	0	1	60	24	34	49	17	0	0	66	0
0	0	0	0	0	0	M	77	18.42	1	128	5	0	0	82	140	80	12.71	207	12	390	6.57	14.06	2.77	43.3	1	1	5	2	0	1	0	0	0	1	0	0	1	60	39	38	49	20	0	0	21	1
0	0	0	0	0	0	F	67	23.42	0	129	1	0	0	90	154	106	7.53	96	0.305	65	5.1	6	1.21	52	1	1	4	1	0	0	0	0	0	1	1	0	1	45	33	35	52	19	0	0	64	0
0	0	0	0	0	0	F	76	23.42	0	130	5	1	0	80	150	80	5.4	122	0.901	6266	9.16	32.2	3.51	53	1	1	4	2	0	1	0	0	1	0	1	0	1	52	38	31	48	20	0	0	77	0
0	0	0	0	0	0	M	63	21.09	1	144	5	0	0	79	137	79	10.81	161	1.11	386	6.01	31.6	2.53	54	1	1	4	1	0	1	0	0	1	0	0	0	1	77	37	36	40	20	0	0	48	0
0	0	0	0	0	0	M	61	23.42	1	119	1	0	0	79	110	70	11.58	254	0.489	450	12.96	13.5	2.65	54	1	1	4	2	1	1	0	0	1	1	1	0	1	34	34	35	57	19	0	0	70	0
0	0	0	0	0	1	F	56	22.03	0	114	3	0	0	78	130	85	9.46	242	0.057	833	4.97	45.9	2.54	55	0	1	4	1	0	0	0	0	1	0	0	0	1	55	27	27	42	16	0	0	80	0
0	0	0	0	0	0	F	67	23.42	0	172	5	0	0	78	167	98	9.11	162	45	3860	4.51	68.8	3.4	55	0	1	4	2	0	1	0	0	0	2	0	0	1	70	29	28	48	20	0	0	57	0
0	0	0	0	0	1	F	64	23.42	0	165	5	0	0	88	128	76	5.88	174	0.201	100	6.81	83.2	1.91	55	1	1	4	2	0	1	0	0	1	1	1	0	1	30	35	35	50	19	0	0	49	0
0	0	0	0	0	0	F	76	13.56	0	86	6	0	0	58	70	45	6.16	187	0.115	4792	4.23	10.7	2.47	55	0	1	4	4	0	1	0	0	1	1	1	0	1	43	34	35	50	19	0	0	40	1
0	0	0	0	0	0	M	71	20	0	141	2	1	0	78	138	86	7.12	163	0.164	796	5.01	31.7	3.01	55.6	0	1	4	2	0	1	0	0	1	1	1	0	0	38	31	27	56	20	0	0	74	0
0	0	0	0	0	0	F	72	23.42	0	144	5	0	0	70	135	75	8.18	146	2.2	2587	15.62	41.6	3.26	56	0	1	4	2	0	1	0	0	1	1	1	0	1	56	35	35	44	19	0	0	71	0
0	0	0	0	0	0	F	53	22.03	0	134	7	0	0	87	100	65	7.55	188	0.122	2587	14.8	25.1	3.49	56	1	1	4	1	1	1	0	0	1	0	0	0	1	47	36	35	46	19	0	0	55	0
0	0	0	0	0	0	M	62	18.34	0	141	5	0	0	110	120	90	10.29	164	0.152	1578	6.37	42.4	2.9	56.7	1	1	4	3	0	0	0	0	1	0	1	0	1	45	35	35	52	19	0	0	66	0
0	0	0	0	0	1	F	63	22.81	0	152	3	0	0	98	180	110	7.2	181	0.182	520	7.85	13.1	3.34	57	1	1	4	1	0	0	0	0	0	0	1	0	1	34	35	35	50	19	0	0	45	0
0	0	0	0	0	0	M	54	21.97	1	134	5	0	0	86	126	80	9.92	162	8.35	99	4.46	31.3	2.39	58	1	1	4	1	0	1	0	0	1	0	1	0	1	47	35	35	50	19	0	0	63	0
0	0	0	0	0	0	M	65	19.05	1	131	0	0	0	55	100	60	8.57	234	0.028	879	3.99	41.6	1.88	60	1	1	0	2	0	0	0	0	0	1	0	0	0	72	35	35	45	19	0	0	65	0
0	0	0	0	0	0	M	59	21.3	1	141	7	0	0	80	120	70	7.86	233	0.199	919	6.21	19.8	2.44	61	0	1	4	1	0	0	0	0	1	0	1	0	1	69	35	35	43	19	0	0	90	0
0	0	0	0	0	0	M	51	20.2	1	132	5	0	0	68	100	70	9.79	162	1.63	40	3.24	46.3	3.66	62	1	1	4	1	0	1	0	0	1	0	0	0	1	56	30	29	46	18	0	0	60	0
0	0	0	0	0	0	M	46	23.42	1	112	3	0	0	82	110	75	5.38	157	0.055	1939	13.05	36.6	2.29	63	1	1	5	1	0	0	0	0	1	0	0	0	1	50	35	35	45	19	0	0	52	0
0	0	0	0	0	0	M	83	24.46	0	119	5	1	0	70	120	70	11.55	149	0.214	85	5.05	21.2	2.44	64	0	1	4	1	0	1	0	0	1	1	1	0	1	65	35	35	43	19	0	0	72	0
0	0	0	0	0	0	M	60	21.8	1	150	5	0	0	49	90	56	6.72	120	0.49	814	5.9	16.3	1.6	64.9	1	1	4	1	0	1	0	0	1	1	1	0	1	46	35	35	49	19	0	0	95	0
0	0	0	0	0	1	M	45	23.42	1	151	5	0	0	80	110	70	13.43	237	2.35	2587	5.05	29.53	1.99	65	0	1	4	1	0	0	0	0	0	0	0	0	1	51	27	31	49	16	0	0	66	0
0	0	0	0	0	0	M	52	26.94	1	141	7	0	0	72	175	105	7.37	216	0.05	426	4.75	53.4	2.58	65	1	1	4	1	0	1	0	0	2	0	0	0	1	50	35	35	57	19	0	0	58	0
0	0	0	0	0	0	M	62	22.86	1	122	5	1	0	70	140	82	5.68	98	1.16	50	6.63	40.2	4.46	66.6	0	1	4	1	0	0	0	0	1	0	0	0	1	60	29	36	46	19	0	1	83	0
0	0	0	0	0	1	F	68	23.42	0	147	1	0	0	70	134	92	8.19	218	0.157	356	5.56	41.6	4.37	67	0	1	5	2	0	1	0	0	0	0	1	0	1	53	31	32	44	16	0	0	63	0
0	0	0	0	0	1	F	76	18.71	0	126	5	0	0	90	150	90	10.4	139	6.5	339	6.38	68.8	0.32	67.5	0	1	4	1	0	1	0	0	2	0	1	0	1	51	47	37	49	21	0	0	13	1
0	0	0	0	0	0	F	70	16.82	0	144	5	0	0	70	140	90	5.68	159	0.073	390	5.56	13.8	3.07	68	1	1	4	1	0	0	0	0	0	0	0	0	0	45	32	36	45	17	0	0	48	0
0	0	0	0	0	0	F	68	23.23	0	143	3	0	0	56	102	52	7.97	196	0.623	1200	4.8	17.5	2.39	68	1	1	4	1	0	0	0	0	0	0	1	0	1	51	29	35	49	17	0	0	46	0
0	0	0	0	0	0	F	66	26.67	0	137	5	0	0	80	120	80	6.02	268	0.029	887	4.7	15.9	2.66	68.4	1	1	4	2	0	1	0	0	1	0	1	0	1	62	35	35	44	19	0	0	84	0
0	0	0	0	0	0	M	67	23.31	1	153	0	0	0	87	145	88	10.21	310	0.251	39.2	6.44	18	1.26	69	0	1	4	1	0	0	0	0	1	0	0	0	1	63	21	37	44	20	0	0	64	0
0	0	0	0	0	0	F	79	24.12	0	122	5	0	0	75	160	90	7.09	273	5.9	1700	20.98	18.6	3.01	69	0	1	5	1	1	0	0	0	0	1	0	0	1	60	28	35	50	18	0	0	44	0
0	0	0	0	0	0	M	66	23.42	0	133	3	0	0	72	130	80	12.11	215	0.086	307	7.47	21.2	2.35	69.1	1	1	4	1	1	0	0	0	0	0	0	0	1	66	35	35	47	19	0	0	98	0
0	0	0	0	0	0	M	62	19.72	1	126	3	0	0	78	160	80	6.27	232	0.064	480	4.81	31.2	2.63	70	1	1	4	1	0	1	0	0	1	1	0	0	1	58	35	35	46	19	0	0	79	0
0	0	0	0	0	1	M	51	25.76	1	140	3	0	0	80	135	75	4.73	164	0.256	81	3.9	10.8	2.19	70.4	1	1	4	2	0	0	0	0	0	0	0	0	0	51	25	31	49	18	0	0
0	0	0	0	0	0	F	70	23.42	0	158	2	0	1	101	142	95	8.31	213	0.011	1687	4.76	13.2	2.77	70.9	1	1	2	1	0	1	1	0	1	1	1	0	1	60	41	45	47	19	0	0
0	0	0	0	0	0	M	85	19.03	2	128	5	0	0	99	120	85	8.07	291	0.516	2587	7.65	33.7	3.06	72	1	1	4	1	1	0	0	0	1	1	1	0	1	58	27	31	48	17	0	0	1	1
0	0	0	0	0	1	M	57	24.09	0	134	5	0	0	74	130	80	9.37	202	0.177	537	5.92	10	1.38	72	1	1	4	2	0	0	0	0	1	1	1	0	1	40	37	31	55	16	0	0	69	0
0	0	0	0	0	0	F	65	22.94	0	124	3	0	0	65	160	85	6.37	227	0.166	96	9.23	12.8	0.49	73.8	1	1	4	1	1	0	1	0	1	1	1	0	1	45	33	28	57	16	0	0	82	0
0	0	0	0	0	0	M	55	24.91	1	116	5	0	0	54	145	100	8.43	208	2.11	2300	13.1	29.5	2.77	74	1	1	4	1	0	1	0	0	0	0	0	0	1	55	34	35	42	19	0	0	45	0
0	0	0	0	0	0	M	56	22.5	0	155	5	0	0	80	130	80	9.98	249	0.13	2587	4.22	49	4.87	74	0	1	4	1	0	1	0	0	0	0	0	0	1	52	30	33	46	17	0	0	52	0
0	0	0	0	0	0	F	69	23.42	0	120	5	0	0	98	110	70	15.7	81	64	12579	7.71	67	2.18	75	0	1	4	4	0	1	0	0	2	1	2	0	1	32	38	35	47	16	0	0	1	1
0	0	0	0	0	0	M	67	23.03	1	115	3	0	0	80	120	70	5.94	133	0.249	890	5.83	11.2	3.24	75	1	1	4	1	0	0	0	0	1	0	0	0	1	49	31	34	50	17	0	0	65	0
0	0	0	0	0	0	M	64	23.42	0	129	5	0	0	76	123	77	13.58	181	0.304	171	5.85	14.8	3.15	75.6	0	1	4	1	0	1	0	0	1	1	1	0	1	48	35	35	50	19	0	0
0	0	0	0	0	0	M	78	20.03	1	99	0	0	0	85	90	60	7.72	321	0.241	441	4.12	7.3	1.31	76	1	1	4	4	0	1	0	0	2	1	2	0	1	45	35	35	42	19	0	0	52	1
0	0	0	0	0	0	F	82	19.11	0	119	5	0	0	110	140	90	7.61	186	0.099	589	22.22	10.8	3.79	77	0	1	4	3	0	1	0	0	2	0	1	0	1	59	40	35	46	19	0	0	62	0
0	0	0	0	0	0	M	63	23.42	1	146	1	0	0	60	115	70	18.39	208	2.53	173	5.33	33.7	3.02	77	1	1	4	2	0	0	0	0	1	1	0	0	1	53	39	33	50	18	0	0	66	0
0	0	0	0	0	0	M	71	23.42	1	153	5	0	0	72	110	60	5.52	175	0.063	2694	7.27	38.3	2.55	78	0	1	4	1	0	0	0	0	0	1	1	0	1	50	35	35	49	19	0	0	86	0
0	0	0	0	0	0	M	53	26.13	0	145	5	0	0	70	130	90	10.82	250	1.6	100	5.03	19	2.53	79	1	1	4	2	0	0	0	0	0	0	0	0	1	44	31	38	45	20	0	0	51	0
0	0	0	0	0	0	M	64	21.48	1	135	5	1	0	60	110	70	6.03	105	0.179	1563	4.24	44.2	1.64	79	1	1	4	1	0	1	0	0	1	1	1	0	1	72	28	35	51	19	0	0	64	0
0	0	0	0	0	0	M	73	20.24	1	129	7	1	0	60	110	70	6.56	153	1.56	1427	5.29	11.2	1.54	80	1	1	4	2	0	1	0	0	2	1	1	0	1	45	40	33	59	18	0	0	61	0
0	0	0	0	0	0	M	57	22.04	0	118	7	0	0	67	96	68	5.83	243	0.162	360	4.98	33.9	1.28	81	1	1	5	1	0	1	0	0	1	0	0	0	0	46	28	28	47	15	0	0	47	0
0	0	0	0	0	0	F	70	20.83	0	125	7	0	0	76	105	50	9.77	253	0.234	3104	5.93	32	2.6	81.1	1	1	4	4	0	1	0	0	0	0	0	0	1	44	35	35	50	19	0	0	68	0
0	0	0	0	0	1	M	66	25.71	0	122	0	0	0	60	120	60	15.03	198	0.104	2587	11.7	16.1	2.79	82	1	1	1	1	1	0	0	0	1	0	1	0	1	51	35	35	46	19	0	0	55	0
0	0	0	0	0	0	F	63	21.63	0	128	5	0	0	65	170	100	6.93	234	0.105	2587	8.41	24.2	2.37	83	1	1	4	1	0	0	0	0	0	0	0	0	1	51	24	27	49	16	0	0	88	0
0	0	0	0	0	0	M	77	23.42	0	137	5	0	0	112	96	69	14.51	198	0.268	13000	7.84	48.4	1.19	83.4	0	1	4	2	1	0	1	1	1	0	1	0	1	51	38	30	49	15	0	0	49	0
0	0	0	0	0	0	M	53	28.34	1	111	5	0	0	70	155	110	7.08	137	0.817	30	5.84	20.31	2.77	84.6	0	1	4	1	0	1	0	0	1	1	0	0	1	67	34	33	40	17	0	0	68	1
0	0	0	0	0	0	M	60	19.92	1	85	2	1	0	71	188	98	6.25	241	0.639	193	4.47	13.4	1.94	85.8	1	1	4	1	0	0	0	0	1	0	1	0	1	44	41	35	49	19	0	0	86	0
0	0	0	0	0	0	M	81	21.56	0	154	5	0	0	93	120	75	9.76	246	0.086	875	5.28	37.5	2.63	86	1	1	4	2	0	0	1	0	1	0	0	0	1	50	32	30	48	19	0	0	62	0
0	0	0	0	0	1	M	76	23.26	1	129	1	0	0	70	120	70	6.55	172	1.33	141	4.53	14.8	2.74	87	0	1	4	1	0	1	0	0	1	0	1	0	0	63	35	40	42	19	0	0	72	0
0	0	0	0	0	0	M	41	27.78	1	126	3	0	0	106	96	58	16.94	178	1.46	168.7	5.92	15.1	1.89	87	0	1	4	2	0	1	0	0	0	0	0	0	1	38	39	38	60	19	0	0	67	0
0	0	0	0	0	1	M	62	23.42	0	142	1	0	0	90	150	90	9.73	183	6.3	91	7.79	17.4	2.96	88	0	1	4	2	1	0	0	0	1	1	1	0	1	39	35	35	57	19	0	0	58	0
0	0	0	0	0	0	M	65	26.67	0	143	5	1	0	71	120	60	6.35	107	0.101	592	8.48	13.4	2.32	89.7	1	1	4	1	1	0	0	0	0	1	0	0	1	68	27	35	54	17	0	1	69	0
0	0	0	0	0	1	M	71	24.57	1	120	5	0	0	89	135	70	7.45	139	0.142	107	6.86	12.2	2.91	90	1	1	4	1	1	0	0	0	1	0	1	0	1	51	32	36	49	20	0	0	46	0
0	0	0	0	0	0	M	67	23.42	1	134	5	0	0	85	125	75	5.51	118	2.9	16000	17.65	37.2	3.88	90	1	1	4	2	1	1	0	0	2	0	1	0	1	33	28	31	57	16	0	0	47	0
0	0	0	0	0	0	F	72	26.67	1	105	1	1	0	58	122	76	5	171	0.297	180	8.71	5.7	2.43	92	1	1	4	1	0	1	0	0	2	0	1	0	1	44	40	34	45	18	0	0	83	0
0	0	0	0	0	0	M	73	23.42	1	119	1	0	0	69	128	79	12.94	207	0.258	554	4.71	37.3	2.66	92	1	1	4	1	0	0	0	0	1	0	1	0	1	53	35	35	53	19	0	0	67	0
0	0	0	0	0	0	M	61	23.42	1	145	5	0	0	78	110	78	6.39	250	1.3	6308	5.92	20.4	2.29	92	1	1	4	3	0	0	0	0	1	1	0	0	1	32	30	30	66	19	0	0	52	0
0	0	0	0	0	0	M	56	23.88	2	142	7	0	0	69	111	59	7.8	226	0.164	1228	5.88	30.9	3.16	93.2	0	1	4	1	0	1	0	0	0	0	0	0	1	60	29	32	49	15	0	0	67	0
0	0	0	0	0	0	M	75	21.26	1	120	0	0	0	77	121	71	5.44	158	0.433	1831	4.84	19.7	1.94	94.5	1	1	7	2	0	0	0	0	0	1	0	0	1	61	30	35	49	18	0	0	91	0
0	0	0	0	0	0	M	79	25.91	1	130	5	0	0	80	150	80	9.96	195	0.495	3300	4.64	41.6	2.02	96	0	1	4	1	0	0	0	0	1	2	1	0	1	61	35	35	55	19	0	0	47	0
